# Supplementary material for: Mild and selective base-free C–H arylation of heteroarenes: experiment and computation
Source: PubMed Central journal article supplement (PMC5356503; doi:10.1039/c6sc02595a), 2016-09-05

## Electronic Supporting Information (ESI)

### *Mild and selective base-free C–H arylation of heteroarenes: Experiment and computation.*

Hannes P. L. Gemoets,<sup>a</sup> Indrek Kalvet,<sup>b</sup> Alexander V. Nyuchev,<sup>a,c</sup> Nico Erdmann,<sup>a</sup> Volker Hessel,<sup>a</sup> Franziska Schoenebeck,<sup>b\*</sup> Timothy Noel<sup>a\*</sup>

<sup>a</sup>Department of Chemical Engineering and Chemistry, Micro Flow Chemistry & Process Technology, Eindhoven University of Technology, Den Dolech 2, 5612 AZ Eindhoven, The Netherlands.

<sup>b</sup>Institute of Organic Chemistry, RWTH Aachen University, Landoltweg 1, 52074 Aachen, Germany.

<sup>c</sup>Department of Chemistry, N. I. Lobachevsky State University of Nizhny Novgorod, 23 Gagarin Avenue, 603950 Nizhny Novgorod, Russian Federation.

E-mail: [t.noel@tue.nl](mailto:t.noel@tue.nl) for Timothy Noël

E-mail: [franziska.schoenebeck@rwth-aachen.de](mailto:franziska.schoenebeck@rwth-aachen.de) for Franziska Schoeneboeck

## Table of Contents

|                                                                                                                                                          |    |
|----------------------------------------------------------------------------------------------------------------------------------------------------------|----|
| 1. General information.....                                                                                                                              | 3  |
| 2. Optimization of reaction conditions. ....                                                                                                             | 4  |
| 2.1 Optimization for the Pd-catalyzed C–H arylation of 1-methylindole.....                                                                               | 4  |
| 2.2 Reaction progress analysis .....                                                                                                                     | 5  |
| 2.3 <sup>1</sup> H-NMR of the crude reaction mixture .....                                                                                               | 7  |
| 2.4 Optimization for the Pd-catalyzed C–H arylation of benzofuran.....                                                                                   | 8  |
| 3. Mechanistic Studies: DFT calculations and experimental investigations. ....                                                                           | 9  |
| 3.1 Progress NMR experiments.....                                                                                                                        | 9  |
| 3.1.1 Progress <sup>1</sup> H-NMR of mixing stoichiometric Pd(OAc) <sub>2</sub> and 1-methylindole in d <sub>8</sub> -THF .....                          | 9  |
| 3.1.2 Progress <sup>19</sup> F-NMR of the reaction 6-fluoro-1-methylindole with 4-fluorobenzenediazonium tetrafluoroborate in EtOAc: 2-MeTHF (1:1) ..... | 10 |
| 3.2 Radical scavenging experiments .....                                                                                                                 | 14 |
| 3.3 Control experiments regarding the non-innocent role of BF <sub>4</sub> <sup>-</sup> .....                                                            | 15 |
| 3.4 Control experiments regarding the oxidative addition step.....                                                                                       | 16 |
| 3.5 DFT calculations: Computational methods .....                                                                                                        | 18 |
| 4. General procedure for the synthesis of aryldiazonium tetrafluoroborates .....                                                                         | 19 |
| 5. General procedure for the Pd-catalyzed C–H arylation of heteroarenes .....                                                                            | 21 |
| 5.1 General procedure for the C–H arylation of 1-methylindole and derivatives (condition A) .....                                                        | 21 |
| 5.2 General procedure for the C–H arylation of NH-indole (conditions B).....                                                                             | 21 |
| 5.3 General procedure for the C–H arylation of benzofuran (condition C) .....                                                                            | 22 |
| 5.4 General procedure for the C–H arylation of benzothiophene (condition D).....                                                                         | 22 |
| 5.5 Procedure for the gram scale C–H arylation of 1-methylindole .....                                                                                   | 23 |
| 6. Procedure for synthesis of Sapisartan precursor .....                                                                                                 | 24 |
| 6.1 Synthesis of 5-methylbenzofuran substrate .....                                                                                                      | 24 |
| 6.2 Synthesis of Sapisartan precursor (8a) .....                                                                                                         | 24 |
| 7. Characterization data for the Pd-catalyzed C–H arylated heteroarenes .....                                                                            | 26 |
| 8. References.....                                                                                                                                       | 45 |
| 9. DFT calculations: XYZ and thermal Data .....                                                                                                          | 46 |
| 10. NMR spectra.....                                                                                                                                     | 59 |

## 1. General information

All components as well as reagents and solvents were used as received without further purification, unless stated otherwise. Reagents and solvents were bought from Sigma Aldrich and TCI and if applicable, kept under argon atmosphere. Technical solvents were bought from VWR International and used as received. Product isolation was performed using silica (60, F254, Merck™), and TLC analysis was performed using Silica on aluminum foils TLC plates (F254, Supelco Sigma-Aldrich™) with visualization under ultraviolet light (254 nm and 365 nm) or appropriate TLC staining. <sup>1</sup>H (400MHz or 500 MHz), <sup>13</sup>C (100MHz) and <sup>19</sup>F (376 MHz) NMR spectra were recorded on ambient temperature using a Bruker-Avance 400 or Mercury 400. <sup>1</sup>H NMR spectra are reported in parts per million (ppm) downfield relative to CDCl<sub>3</sub> (7.26 ppm) and all <sup>13</sup>C NMR spectra are reported in ppm relative to CDCl<sub>3</sub> (77.2 ppm). NMR spectra uses the following abbreviations to describe the multiplicity: s = singlet, d = doublet, t = triplet, q = quartet, p = pentet, h = hexet, hept = heptet, m = multiplet, dd = double doublet, td = triple doublet. Known products were characterized by comparing to the corresponding <sup>1</sup>H NMR and <sup>13</sup>C NMR from literature. GC analyses were performed on a GC-FID (Varian 430-GC) in combination with an auto sampler (Varian CP-8400) or GC-MS combination (Shimadzu GC-2010 Plus coupled to a Mass Spectrometer; Shimadzu GCMS-QP 2010 Ultra) with an auto sampler unit (AOC-20i, Shimadzu). Melting points were determined with a Buchi B-540 capillary melting point apparatus in open capillaries and are uncorrected. Infrared spectra were recorded on a Shimadzu IR Affinity-1 Fourier Transform Infrared Miracle 10 Single Reflection ATR Spectrometer.

## 2. Optimization of reaction conditions.

### 2.1 Optimization for the Pd-catalyzed C–H arylation of 1-methylindole

**Table S 1: Optimization table for Pd-catalyzed C–H arylation of 1-methylindole**

Reaction scheme: 1-methylindole (1a) + benzene diazonium tetrafluoroborate (2a)  $\xrightarrow[\text{open flask}]{\text{catalyst (x mol\%)}, \text{solvent (0.2 M)}}$  1-methyl-2-phenylindole (3a)

| Entry           | Catalyst (mol%)                                                         | Solvent              | Reaction time | Yield GC-FID (%)                 |
|-----------------|-------------------------------------------------------------------------|----------------------|---------------|----------------------------------|
| 1               | Pd(OAc) <sub>2</sub> (10.0), Ru(bpy) <sub>3</sub> Cl <sub>2</sub> (2.5) | DMF                  | 30 min        | 62 <sup>b</sup> ;65 <sup>c</sup> |
| 2               | Ru(bpy) <sub>3</sub> Cl <sub>2</sub> (2.5)                              | DMF                  | 2 h           | 0 <sup>b</sup>                   |
| 3               | Pd(OAc) <sub>2</sub> (5.0)                                              | H <sub>2</sub> O     | 30 min        | trace                            |
| 4               | Pd(OAc) <sub>2</sub> (5.0)                                              | AcOH                 | 30 min        | 22                               |
| 5               | Pd(OAc) <sub>2</sub> (5.0)                                              | MeOH                 | 30 min        | 57                               |
| 6               | Pd(OAc) <sub>2</sub> (5.0)                                              | EtOH                 | 30 min        | 69                               |
| 7               | Pd(OAc) <sub>2</sub> (5.0)                                              | iPrOH                | 30 min        | 72                               |
| 8               | Pd(OAc) <sub>2</sub> (5.0)                                              | n-BuOH               | 30 min        | 38                               |
| 9               | Pd(OAc) <sub>2</sub> (5.0)                                              | PC                   | 30 min        | 35                               |
| 10              | Pd(OAc) <sub>2</sub> (5.0)                                              | DMF                  | 30 min        | 34                               |
| 11              | Pd(OAc) <sub>2</sub> (5.0)                                              | EtOAc                | 30 min        | 22                               |
| 12              | Pd(OAc) <sub>2</sub> (5.0)                                              | DCM                  | 30 min        | 28                               |
| 13              | Pd(OAc) <sub>2</sub> (5.0)                                              | DCE                  | 30 min        | 27                               |
| 14              | Pd(OAc) <sub>2</sub> (5.0)                                              | CHCl <sub>3</sub>    | 30 min        | 16                               |
| 15              | Pd(OAc) <sub>2</sub> (5.0)                                              | 1,4-dioxane          | 30 min        | 26                               |
| 16              | Pd(OAc) <sub>2</sub> (5.0)                                              | solvent <sup>d</sup> | 30 min        | 0                                |
| 17              | Pd(OAc) <sub>2</sub> (0.2)                                              | EtOAc:2-MeTHF (1:0)  | 1 h           | 17                               |
| 18              | Pd(OAc) <sub>2</sub> (0.2)                                              | EtOAc:2-MeTHF (3:1)  | 1 h           | 10                               |
| 19              | Pd(OAc) <sub>2</sub> (0.2)                                              | EtOAc:2-MeTHF (1:3)  | 1 h           | trace                            |
| 20              | Pd(OAc) <sub>2</sub> (0.2)                                              | EtOAc:2-MeTHF (0:1)  | 1 h           | trace                            |
| 21 <sup>e</sup> | Pd(OAc) <sub>2</sub> (0.5)                                              | EtOAc:2-MeTHF (1:1)  | 1 h           | trace                            |
| 22 <sup>f</sup> | Pd(OAc) <sub>2</sub> (0.5)                                              | EtOAc:2-MeTHF (1:1)  | 1 h           | 72                               |
| 23 <sup>g</sup> | Pd(OAc) <sub>2</sub> (0.5)                                              | EtOAc:2-MeTHF (1:1)  | 1 h           | 37                               |

<sup>a</sup>reaction conditions: catalyst, 0.5 mmol heteroarene and 1.2 equiv. diazonium salt in 2.5 mL solvent, rt, 0.1 equiv. decafluorobiphenyl as internal standard for GC-FID, open flask; <sup>b</sup>CFL irradiation used as visible light source; <sup>c</sup>no presence of light; <sup>d</sup>solvent: acetone, diethyl ether, MeCN, toluene; <sup>e</sup>0.1 M; <sup>f</sup>0.5 M; <sup>g</sup>1.0 M;

Control experiments revealed that there was no dual catalysis present (Table S 1, entries 1-2).<sup>1</sup> It was found that the reaction was catalyzed by only palladium. Moreover, in the case of Ru(bpy)<sub>3</sub>Cl<sub>2</sub> in combination with visible light, a significant amount (<10%) of biphenyl formation was detected on GC-MS, indicating that the photo induced radical chemistry was working, although not participating in the palladium cycle. In the case only Pd(OAc)<sub>2</sub> was used, no biphenyl formation was detected. Table S 1, entries 3-16 show the calculated GC-FID yields for all other solvent tried during solvent screening.

It was demonstrated that the use of EtOAc:2-MeTHF (1:1) was superior as solvent mixture. Several other ratios between the two solvents were examined, but all resulted in lower yields (Table S 1, entries 17-20). A brief concentration screening was carried out (Table S 1, entries 21-23). Both as well as lower as higher concentration than 0.2M resulted in sluggish reaction conditions. Caution: 1.0M reaction resulted in uncontrollable heat buildup once the reaction started.

## 2.2 Reaction progress analysis

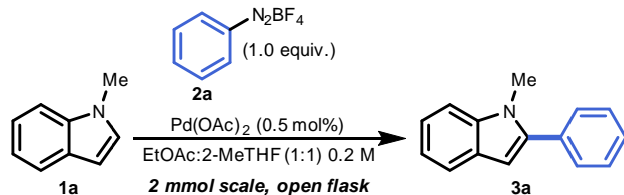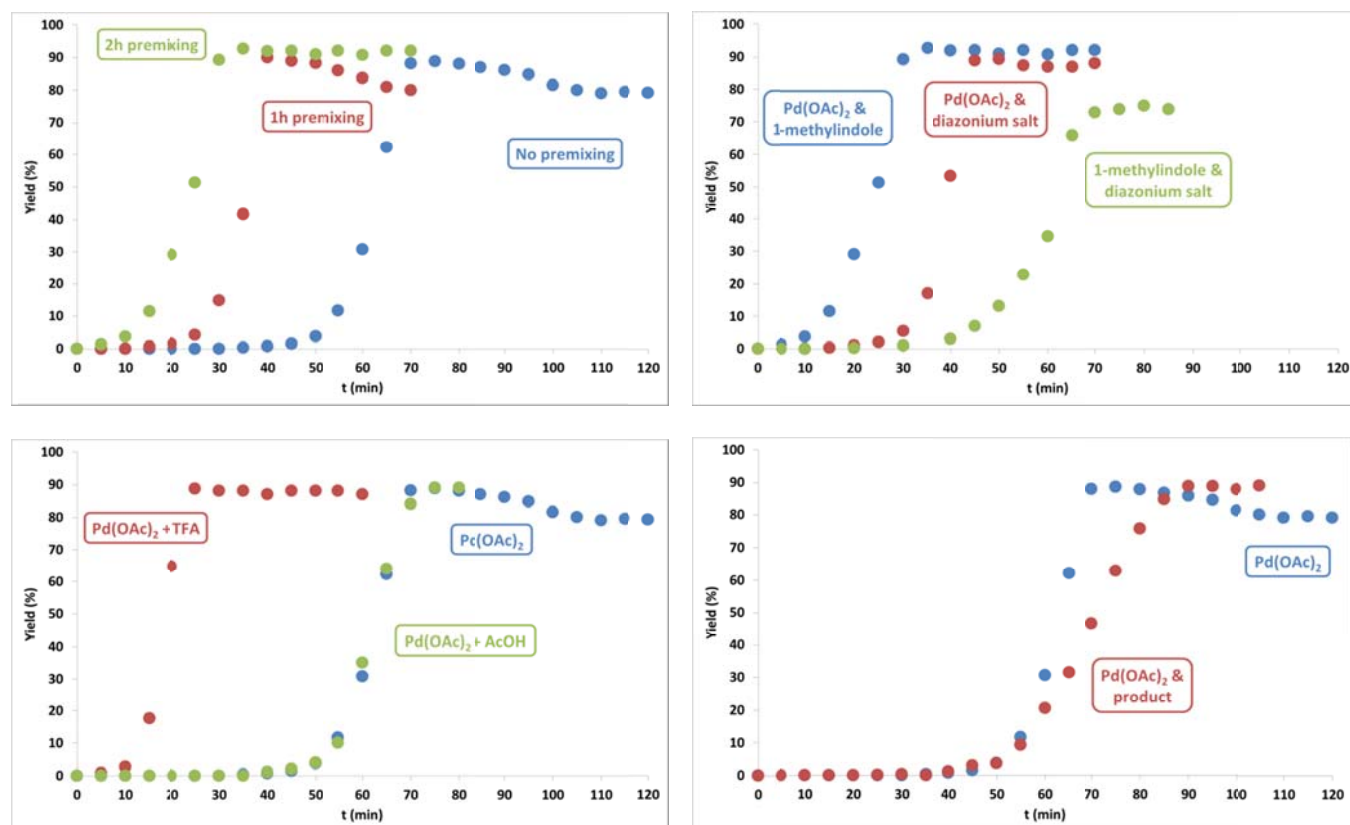

Figure S 1: Reaction progress analysis (yield as function of time). Upper left graph: A comparison of different pre-mixing times. For no and 1h pre-mixing, 1.1 equiv. of diazonium salt was used. Upper right graph: Different combinations of 2h pre-mixing. Down left graph: Comparison between addition of TFA and AcOH (1.0 equiv.). Down right graph: Product addition (0.5 equiv.) to the reaction mixture.

For the reaction progress analysis, reactions were performed on a 2.0 mmol scale. Samples were taken every 5 minutes with a syringe and were immediately quenched by performing a micro-column with silica (in order to filter of catalyst and remaining aryldiazonium salt). EtOAc was used as eluent. The collected phase was extracted by an saturated  $NaHCO_3$  (aq) solution. Finally, organic layer was analyzed on GC-FID. In order to calculate the appropriate yield, a calibration curve was made with decafluorobiphenyl as internal standard.

Upper left graph: Several experiments were conducted in order to find the necessary premixing time between Pd(OAc)<sub>2</sub> and 1-methylindole. No more induction time was present when premixing catalyst and substrate for 2 hours.

Upper right graph: Several combinations of premixing were conducted. In the case of premixing Pd(OAc)<sub>2</sub> with phenyldiazonium tetrafluoroborate for 2 hours, a slight shortening of induction period was observed. This can be related to the complexation of Pd(o) species with solvent. Although this effect was far less expressed than complexation with 1-methylindole. In case of premixing 1-methylindole with phenyldiazonium tetrafluoroborate, no decrease of induction period was observed. This observation correlates with theory of catalyst activation. After the reaction was complete, a slight lower yield was observed (approximate drop of 20%). This is due to byproduct (3-(arylo)-1-methylindole **1aa**) formation during 2 hours premixing.

Down left graph: A remarkable observation was in the case of acid addition. The addition of 1.0 equiv. of TFA resulted in no more induction period (approx. same effect as 2h premixing Pd(OAc)<sub>2</sub>). Although we are not sure, we consider that TFA acts as a better leaving group on the Pd(II) species, thereby allowing the reduction step of Pd(II) to Pd(o) to take place more easily. A control experiment with 1.0 equiv. of AcOH (excludes ligand effects) shows that indeed the induction period is unaffected by acidic conditions.

Down right graph: An experiment with the addition of 0.5 equiv. of 1-methyl-2-phenylindole (product) at start shows that there is a slight product inhibition behavior present during the reaction (less steep slope). This can be due to the fact that there is a competition between the ligation of substrate or product to the catalyst. As reported previously in the case of a C-H olefination protocol, the ligation state of the catalyst with product could lead to a slightly more stable complex, which in turn lower the catalyst performance for the desired reaction.<sup>2</sup> Although, no research has been done yet to proof this statement.

### 2.3 $^1\text{H-NMR}$ of the crude reaction mixture

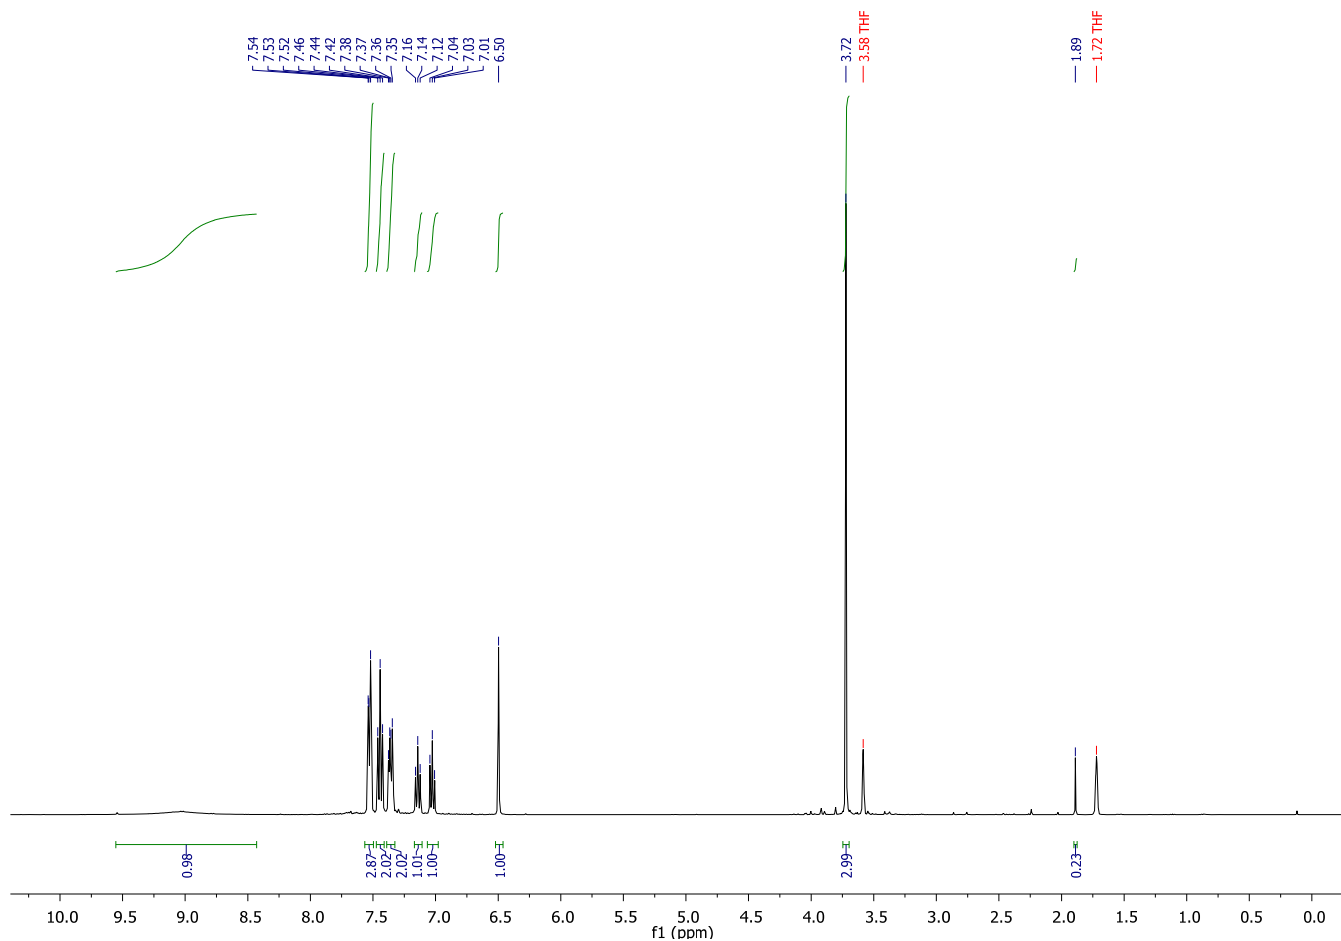

Figure S 2:  $^1\text{H-NMR}$  taken of crude reaction mixture. Reaction conditions: 1.0 mol %  $\text{Pd}(\text{OAc})_2$ , 1.0 mmol 1-methylindole and 1.0 equiv. benzenediazonium salt in 5 mL  $d_8\text{-THF}$  at rt, open flask, 1 h reaction;

A reaction was performed with the optimized reaction conditions in  $d_8\text{-THF}$ . Note that, apart from the solvent residual peaks of  $d_8\text{-THF}$ , only the product signals are observed. In addition, a broad singlet at around 9 ppm is observed. Which is proposed to be the  $\text{H}^+$  that is released after the anti- $\beta$ -deprotonation rearomatisation. With this crude  $^1\text{H-NMR}$  we would like to emphasize the clean nature of our optimized reaction conditions.

## 2.4 Optimization for the Pd-catalyzed C–H arylation of benzofuran

**Table S 2: Optimization table for Pd-catalyzed C–H arylation of benzofuran**

| Entry          | aryldiazonium salt (equiv.) | Pd(OAc) <sub>2</sub> (mol%) | Solvent              | TFA (equiv.) | Reaction time | Isolated Yield (%) |
|----------------|-----------------------------|-----------------------------|----------------------|--------------|---------------|--------------------|
| <sup>b</sup> 1 | 1.0                         | 0.5                         | EtOAc:2-MeTHF (1:1)  | -            | overnight     | 17 <sup>c</sup>    |
| 2              | 1.0                         | 0.5                         | solvent <sup>d</sup> | -            | overnight     | <25 <sup>c</sup>   |
| 3              | 1.0                         | 0.5                         | MeOH                 | -            | overnight     | 42 <sup>c</sup>    |
| 4              | 1.0                         | 0.5                         | MeOH                 | 1.0          | 30 min        | 42                 |
| 5              | 1.2                         | 0.5                         | MeOH                 | 1.0          | 30 min        | 48;52 <sup>c</sup> |
| 6              | 2.0                         | 0.5                         | MeOH                 | 1.0          | 30 min        | 48                 |
| 7              | 1.2                         | 1.0                         | MeOH                 | 1.0          | 30 min        | 49                 |
| 8 <sup>e</sup> | 1.2                         | 0.5                         | MeOH                 | 1.0          | 30 min        | 81                 |

<sup>a</sup>reaction conditions: 0.5 – 1.0 mol % Pd(OAc)<sub>2</sub>, 1.0 mmol heteroarene, 1.0 – 2.0 equiv. 3-trifluoromethylbenzenediazonium tetrafluoroborate and 0 – 1.0 equiv. TFA in 5 mL solvent at rt, <sup>b</sup>2h premixing of Pd(OAc)<sub>2</sub> with benzofuran; <sup>c</sup>F-NMR yield; <sup>d</sup>THF, EtOH, *i*PrOH, CF<sub>3</sub>CH<sub>2</sub>OH, EtOAc, MeCN; <sup>e</sup>after reaction 15 min reflux with acetyl chloride (5 equiv.);

A brief optimization in case of benzofuran was necessary, since optimized conditions for 1-methylindole did not give satisfying results (Table S 2, Entry 1). A solvent screening was conducted to find a more appropriate solvent (Table S 2, entries 2-3). It was found that MeOH offered the best results (42%). In the case of 1-methylindole, MeOH was considered a bad solvent since with polar protic solvents, the side reaction (electrophilic substitution) became significant (see main article). In the case of benzofuran no electrophilic substitution was observed, which allowed us to use the more reactive polar protic solvents. However, with the use of MeOH as solvent, overnight reaction was still necessary in order to obtain full conversion. Note, that it was found before in the optimization of 1-methylindole, that the addition of 1.0 equiv. of TFA helped accelerating the reaction (Figure S 1, down left graph), although it was not necessary in the case of 1-methylindole to add TFA (reaction was within 1 hour without TFA) for the scope. With this knowledge we considered that the addition of TFA could help accelerate the reaction in case of benzofuran. Satisfyingly, with the addition of TFA the reaction could be accelerated to only 30 minutes reaction time in order to obtain reaction completion (Table S 2, Entry 4). Selectivity was unaffected. Next, we sought out if it was possible to increase the yield of the desired product by using an excess of the 3-trifluoromethylbenzenediazonium tetrafluoroborate (Table S 2, entries 5-6). However, only a slight increase in the yield was noticed with the use of 1.2 equivalents. Next, a higher catalyst loading was carried out (Table S 2, Entry 7), but no increase was observed. What was found that there was a significant side reaction occurring with the solvent MeOH after the carbopalladation (this is discussed in the main article), forming a racemic mixture of 3-methoxy-2-(3-



trifluoromethyl)phenyl)-2,3-dihydrobenzofuran (**6ee**). Finally, after 15 minutes refluxing of the resulting reaction mixture with addition of 5.0 equiv. of acetyl chloride, the byproduct could easily be transformed to the desired product (Table S 2, Entry 8), obtaining a satisfying yield of 81%.

### 3. Mechanistic Studies: DFT calculations and experimental investigations.

#### 3.1 Progress NMR experiments

##### 3.1.1 Progress $^1\text{H}$ -NMR of mixing stoichiometric $\text{Pd}(\text{OAc})_2$ and 1-methylindole in $d_8$ -THF

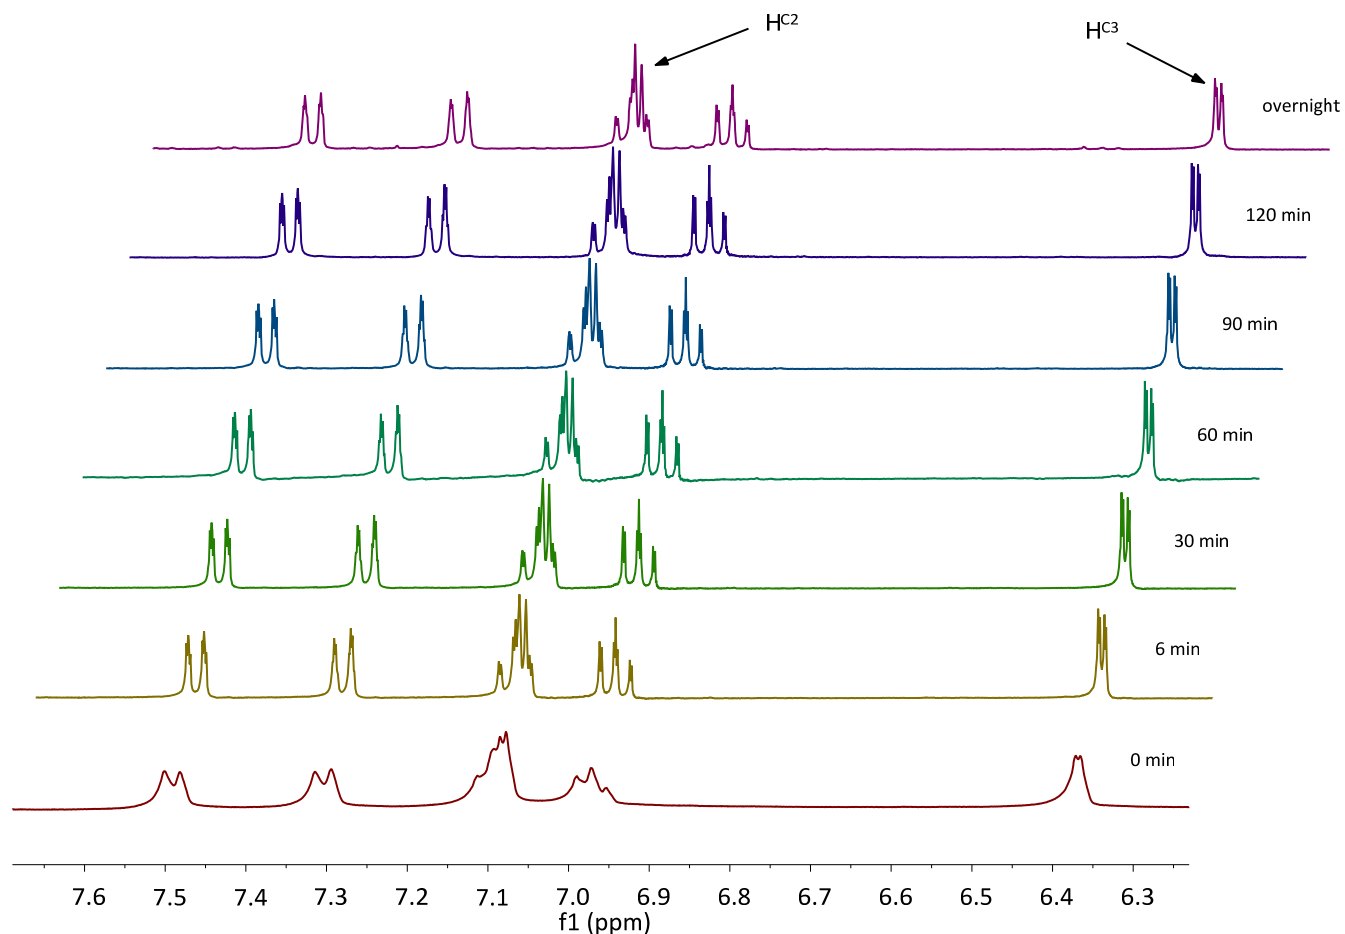

Figure S 3: Progress  $^1\text{H}$ -NMR waterfall plot of stoichiometric experiment with  $\text{Pd}(\text{OAc})_2$  and 1-methylindole in  $d_8$ -THF

A waterfall plot was made of premixing stoichiometric amount of  $\text{Pd}(\text{OAc})_2$  and 1-methylindole in  $d_8$ -THF (0.2 M). Graphical at 0 min was taken before addition of  $\text{Pd}(\text{OAc})_2$ . As can be seen from Figure S 3, both  $\text{H}_{\text{C}2}$  and  $\text{H}_{\text{C}3}$  remain unaffected throughout the plot. This indicates that there is no formal C-H activation occurring at the nucleophilic site of 1-methylindole. What was noted during progress  $^1\text{H}$ -NMR is the change of color of reaction mixture (from brown to dark green). It was postulated that rather instead of C-H activation on the C-3 carbon of 1-methylindole, the latter substrate helped forming a non-covalent complex through its  $\pi$ -donating character, stabilizing formed homogeneous  $\text{Pd}(0)$  species, which in turn acts as the active catalyst for the oxidative addition with the aryldiazonium salt.

### 3.1.2 Progress $^{19}\text{F}$ -NMR of the reaction 6-fluoro-1-methylindole with 4-fluorobenzenediazonium tetrafluoroborate in EtOAc: 2-MeTHF (1:1)

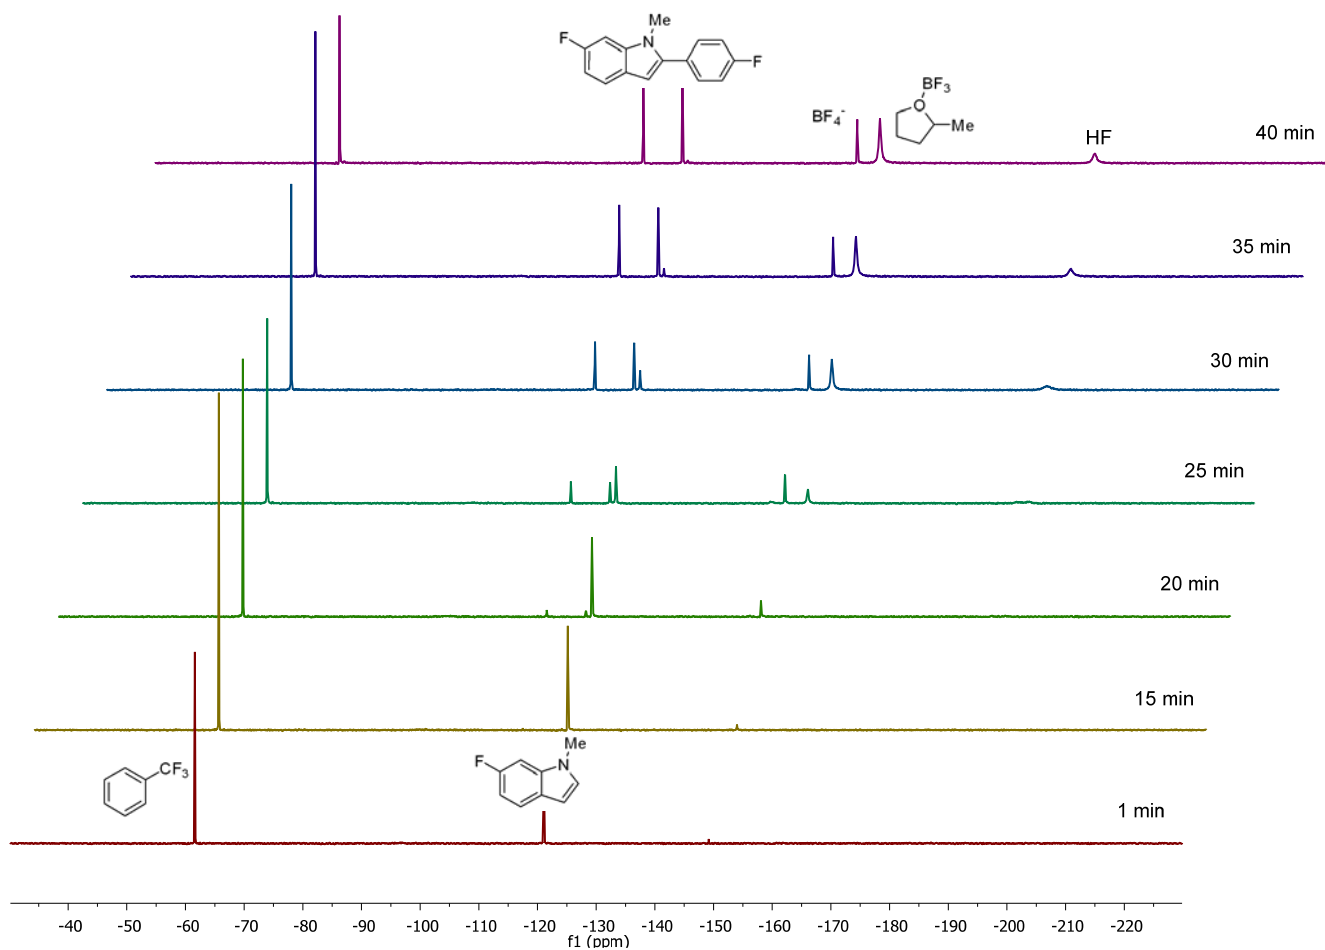

Figure S 4: Progress  $^{19}\text{F}$ -NMR waterfall plot of the reaction 6-fluoro-1-methyl with 4-fluorobenzenediazonium tetrafluoroborate in EtOAc: 2-MeTHF (1:1)

A progress  $^{19}\text{F}$ -NMR experiment was conducted in order to shed more light on the non-innocent behavior of the  $\text{BF}_4^-$  anion in the proposed Heck-catalytic cycle. The experiment was performed as following:

First a suspension of 4-fluorobenzenediazonium tetrafluoroborate (0.2 mmol) in 500  $\mu\text{L}$  EtOAc:2-MeTHF (1:1) was loaded into the NMR tube. Note, that the 4-fluorobenzenediazonium tetrafluoroborate was not well soluble in the presented reaction mixture. Therefore, the fluorine signals F (-88.44 ppm) and  $\text{BF}_4^-$  (-151.97 ppm) of the diazonium salt cannot be used as quantitative parameters.

Next, a homogeneous solution of  $\text{Pd}(\text{OAc})_2$  (2.87 mol%), 6-fluoro-1-methylindole (0.2 mmol) and  $\alpha,\alpha,\alpha$ -trifluorotoluene (0.067 mmol, as internal standard) in 500  $\mu\text{L}$  EtOAc:2-MeTHF was added to the NMR tube.

The resulted reaction mixture was then monitored via NMR at room temperature. A  $^{19}\text{F}$ -NMR of the reaction mixture was taken approximately every minute. Figure S 4 illustrates a waterfall plot of the  $^{19}\text{F}$ -NMRs taken at 1, 15, 20, 25, 30, 35 and 40 minutes reaction time. Moreover, Figure S 5 represents the calculated yield of the observed compounds based on the its  $^{19}\text{F}$  signal, as compared to the internal standard  $\alpha,\alpha,\alpha$ -trifluorotoluene (-63.72 ppm). The  $^{19}\text{F}$  signals in Figure S 6 at -155.82

ppm and -192.44 ppm could be distinguished as  $\text{BF}_3\cdot 2\text{-MeTHF}$  and HF respectively, when compared to the reference  $^{19}\text{F}$  signals of  $\text{BF}_3\cdot \text{OMe}_2$  (Figure S 7) and generated HF (Figure S 8) in EtOAc:2-MeTHF (1:1). Gratifyingly, taken into account the fluorine signal ratios (1:3 for  $\text{BF}_3\cdot 2\text{-MeTHF}$  and 1:1 for HF compared to the -122.17 ppm signal of the product), a strong correlation was observed, indicating that both  $\text{BF}_3\cdot 2\text{-MeTHF}$  and HF are generated in the same rate as the desired product. As example, Figure S 6 illustrates this for 40 minutes reaction time (note integration of the  $^{19}\text{F}$  signals). Derived from these experimental observations, we can postulate that the  $\text{BF}_4^-$  (which stabilizes the carbopalladation intermediate **II**) and the solvent 2-MeTHF both assist in the anti- $\beta$ -deprotonation rearomatisation, through the formation of HF and  $\text{BF}_3\cdot 2\text{-MeTHF}$  (see Scheme S 1). These experimental results present the first proof that  $\text{BF}_4^-$  anions play a non-innocent role in the Heck-catalytic cycle.

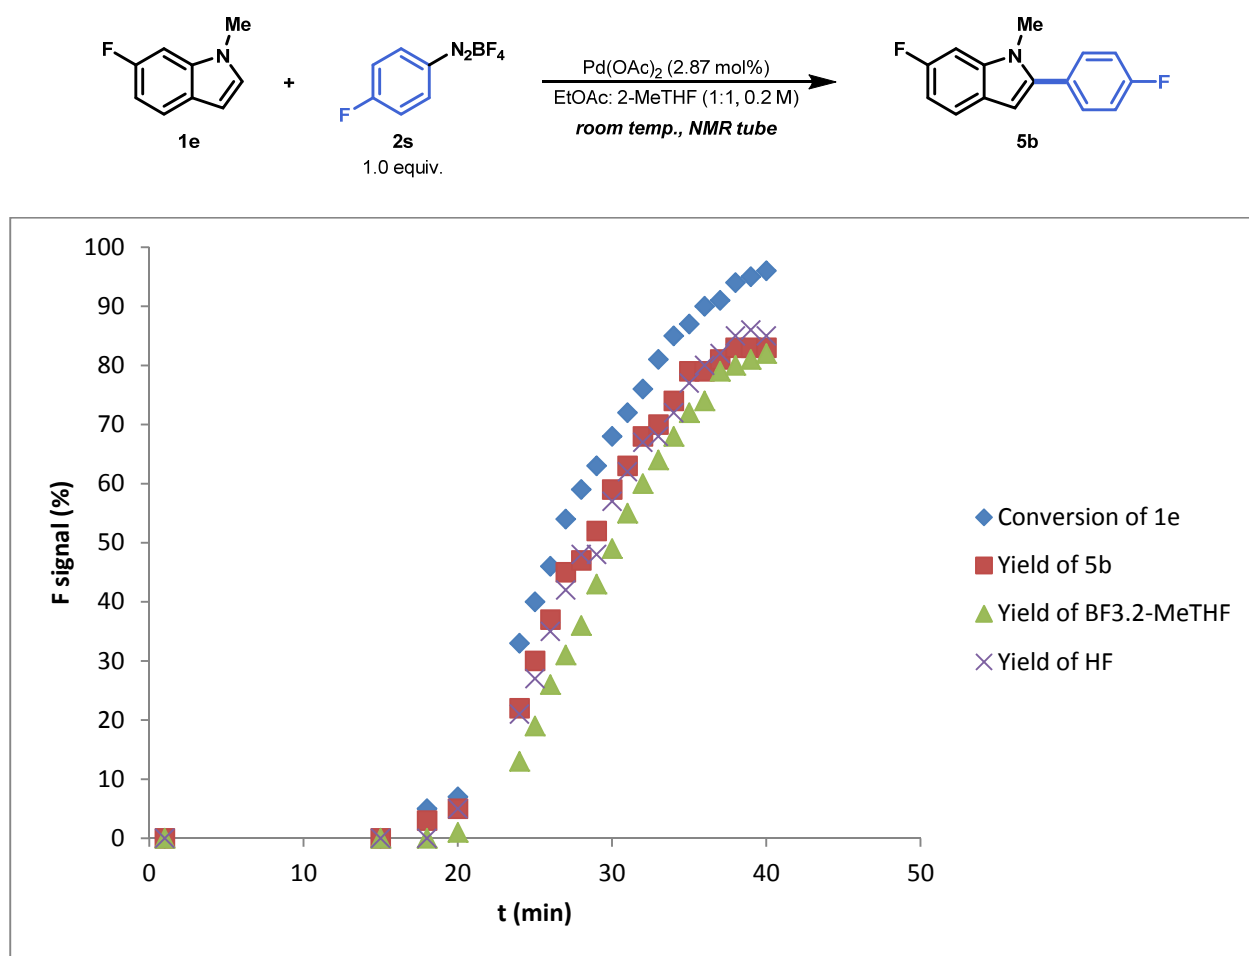

Figure S 5:  $^{19}\text{F}$ -NMR monitoring of the reaction 6-fluoro-1-methyl with 4-fluorobenzenediazonium tetrafluoroborate in EtOAc:2-MeTHF (1:1). Reaction conditions: 2.87 mol %  $\text{Pd}(\text{OAc})_2$ , 0.2 mmol 6-fluoro-1-methylindole and 1.0 equiv. 4-fluorobenzenediazonium tetrafluoroborate in 1 mL EtOAc:2-MeTHF (1:1) at rt, NMR tube; Conversion and Yield was monitored by the  $^{19}\text{F}$  signals of reaction mixture.  $\alpha,\alpha,\alpha$ -trifluorotoluene (-63.72 ppm) was used as internal standard.

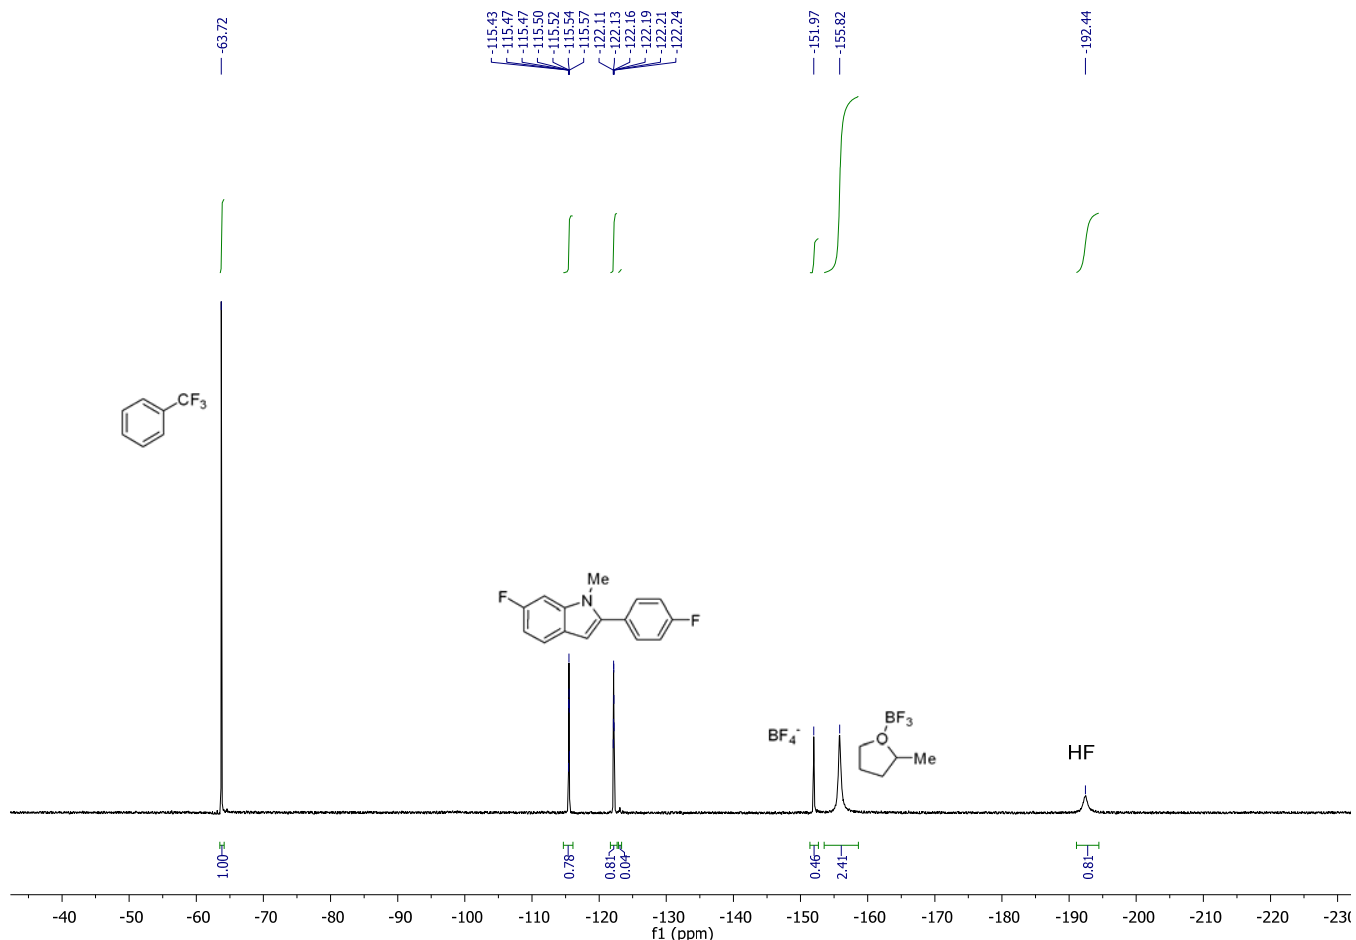

Figure S 6:  $^{19}\text{F}$ -NMR of the reaction 6-fluoro-1-methyl with 4-fluorobenzenediazonium tetrafluoroborate in EtOAc: 2-MeTHF (1:1) after 40 min reaction time. Note, that a strong correlation was found in the integration of the signals of  $\text{BF}_3\cdot 2\text{-MeTHF}$  (-155.82 ppm) and  $\text{F}^-$  (-192.44 ppm) with 6-fluoro-1-methylindole (-115.50 and -122.17 ppm multiplets).

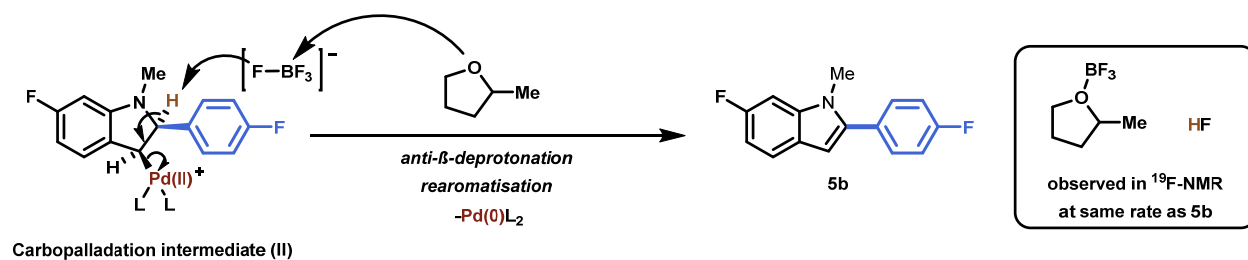

Scheme S 1: Proposed anti- $\beta$ -deprotonation rearomatization assisted by the  $\text{BF}_4^-$  anion. Both  $\text{BF}_3\cdot 2\text{-MeTHF}$  and  $\text{HF}$  were observed in F-NMR in quantitative correlation to the desired product (**5b**).

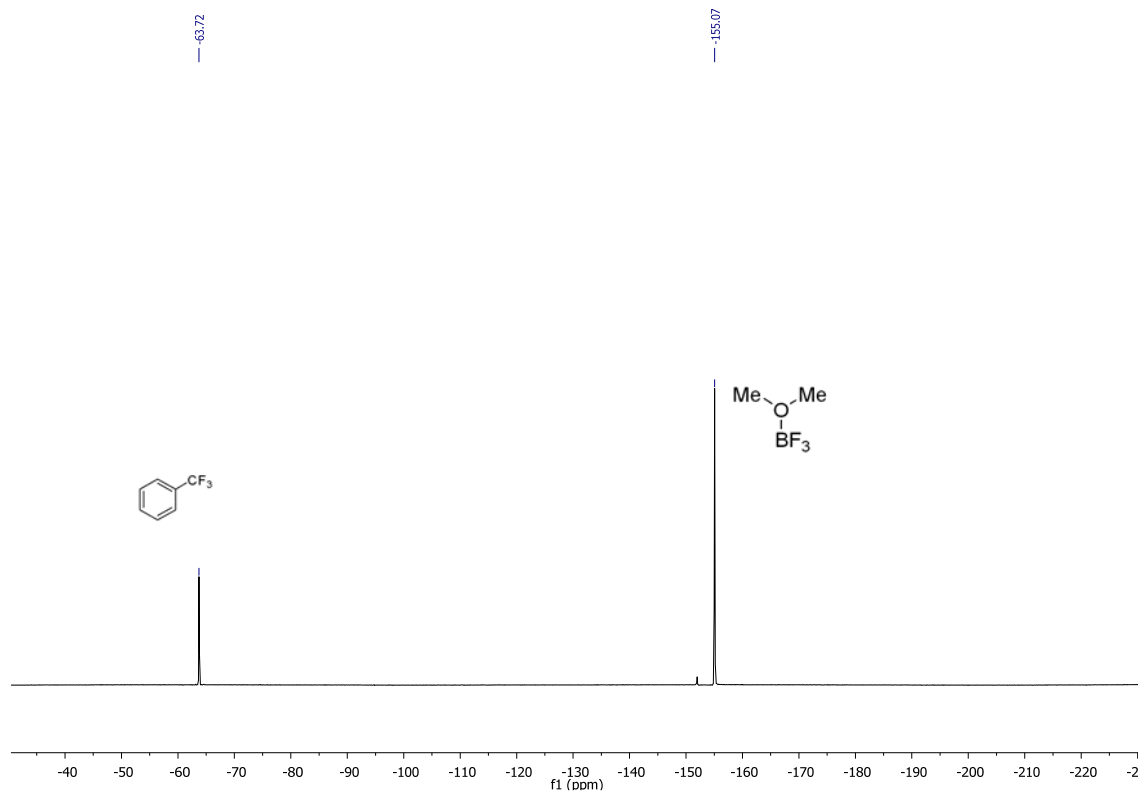

Figure S 7:  $^{19}\text{F}$ -NMR of  $\text{BF}_3\cdot\text{OMe}_2$  dissolved in  $\text{EtOAc}:2\text{-MeTHF}$  (1:1) with  $\alpha,\alpha,\alpha$ -trifluorotoluene (-63.72 ppm) used as internal standard. -155.07 ppm was identified as the  $^{19}\text{F}$  signal of  $\text{BF}_3\cdot\text{OMe}_2$ . Therefore, it is highly plausible that the signal at -155.82 ppm in the reaction mixture (Figure S 6) is that of  $\text{BF}_3\cdot 2\text{-MeTHF}$ .

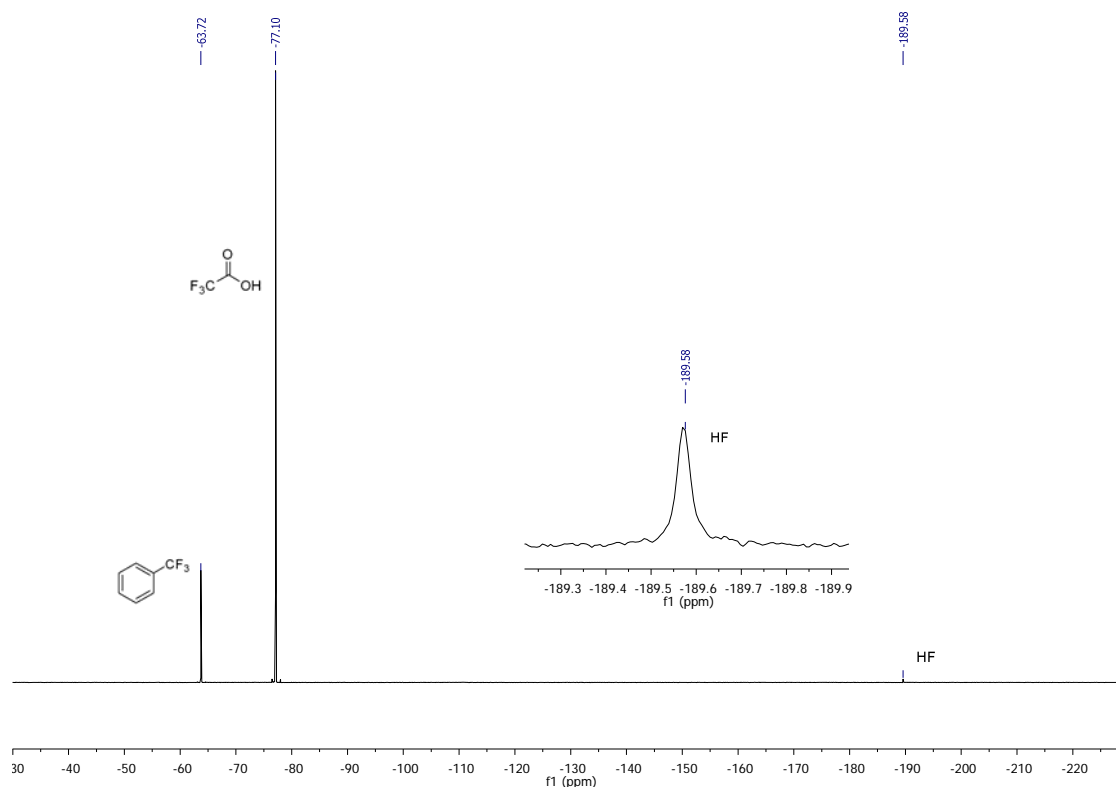

Figure S 8:  $^{19}\text{F}$ -NMR of  $\text{NaF}$  (0.1 mmol) + trifluoroacetic acid (excess.) in 1 mL of  $\text{EtOAc}:2\text{-MeTHF}$  (1:1) with  $\alpha,\alpha,\alpha$ -trifluorotoluene (-63.72 ppm) used as internal standard. -189.58 ppm was identified as the  $^{19}\text{F}$  signal of *in situ* generated HF (derived from  $\text{NaF}$  + acid). Therefore, it is highly plausible that the signal at -192.44 ppm in the reaction mixture (Figure S 6) is that of *in situ* generated HF. Note:  $\text{NaF}$  was insoluble in  $\text{EtOAc}:2\text{-MeTHF}$  (1:1), a precipitate was present.

### 3.2 Radical scavenging experiments

Table S 3: Radical scavenging experiments

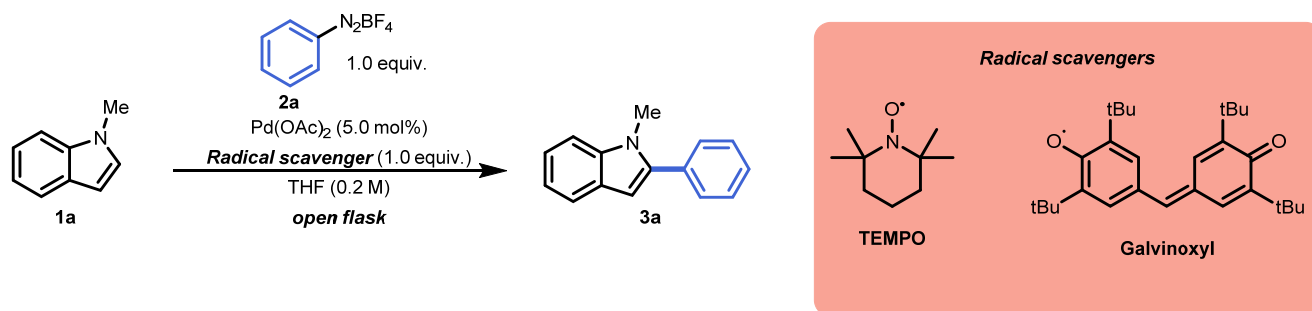

| Entry | Radical scavenger (equiv.) | Addition radical scavenger | GC-MS yield before addition (%) | GC-MS yield after 30 min (%) | Comments for GC-MS       |
|-------|----------------------------|----------------------------|---------------------------------|------------------------------|--------------------------|
| 1     | -                          | -                          | -                               | 76                           | -                        |
| 2     | TEMPO (1.0)                | 5 min                      | 5                               | 5                            | No trapped intermediates |
| 3     | Galvinoxyl (1.0)           | 5 min                      | 5                               | 5                            | No trapped intermediates |
| 4     | TEMPO (1.0)                | 15 min                     | 21                              | 21                           | No trapped intermediates |

<sup>a</sup>reaction conditions: 5.0 mol% Pd(OAc)<sub>2</sub>, 0.5 mmol heteroarene and 1.0 equiv. diazonium salt in 2.5 mL solvent, rt, 0.1 equiv. decafluorobiphenyl as internal standard for GC-FID, open flask, 1.0 equiv. of radical scavenger added at indicated reaction time

Radical scavenging was carried out in order to find possible trapped intermediates. Radical scavengers used were TEMPO or Galvinoxyl (1.0 equiv.). Radical scavenger was added to the reaction mixture on a certain time after the reaction was started. Both scavenger were unable to trap any possible radical intermediates. Note, that upon addition of radical scavenger, the reaction stopped immediately (Table S 3, entries 2 – 4). However, this is more likely due to catalyst poisoning.

### 3.3 Control experiments regarding the non-innocent role of $\text{BF}_4^-$

Table S 4: Control experiments with other counterions<sup>a</sup>

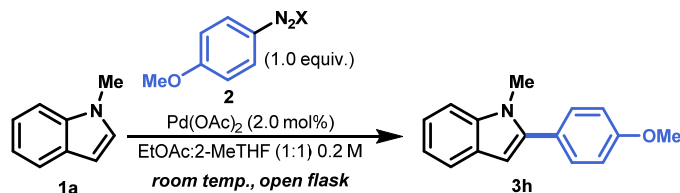

| Entry | Counterion (X)  | reaction time | isolated Yield (%) |
|-------|-----------------|---------------|--------------------|
| 1     | $\text{BF}_4^-$ | 2 h           | 82 <sup>b</sup>    |
| 2     | $\text{OMs}^-$  | 16 h          | 0                  |
| 3     | $\text{OTs}^-$  | 2 h           | 62 <sup>c</sup>    |

<sup>a</sup>Reaction conditions: 2.0 mol % Pd(OAc)<sub>2</sub>, 0.5 mmol 1-methylindole and 1.0 equiv. 4-methoxybenzenediazonium salt in 2.5 mL EtOAc:2-MeTHF (1:1) at rt, open flask; <sup>b</sup>0.5 mol % Pd(OAc)<sub>2</sub>; <sup>c</sup>addition of 0.5 equiv.  $\text{BF}_4^-$  (from a HBF<sub>4</sub> 48wt% in H<sub>2</sub>O solution) after 15 minutes;

Control experiments were conducted with 4-methoxybenzenediazonium mesylate (and tosylate) in order to verify the non-innocent behavior of  $\text{BF}_4^-$ . No desired product was observed using the latter aryldiazonium salts (Table S4). In case of 4-methoxybenzenediazonium tosylate, 0.5 equiv. of  $\text{BF}_4^-$  (as HBF<sub>4</sub>) was added to the reaction mixture after 15 minutes. Upon addition, immediate gas formation and color change was observed. After 2 hours, the reaction was completed and the desired product was obtained in 62% isolated yield.

The control experiments described above showcase that the presence of the counterion  $\text{BF}_4^-$  has a positive effect on the reaction performance. Thus, emphasizing the non-innocent behavior of  $\text{BF}_4^-$  (as hypothesized in the main manuscript).

### 3.4 Control experiments regarding the oxidative addition step

Table S 5: Trapping the aryldiazonium tetrafluoroborate via oxidative addition<sup>a</sup>

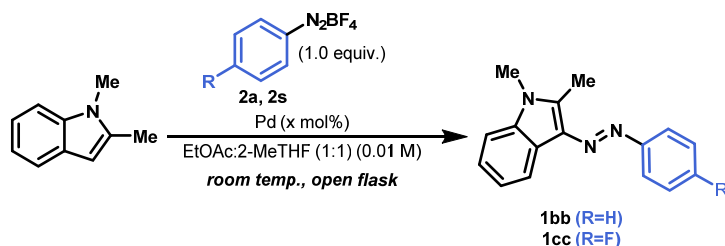

| Entry | R     | catalyst (mol %)                         | Reaction time | isolated Yield (%) |
|-------|-------|------------------------------------------|---------------|--------------------|
| 1     | R = H | Pd(OAc) <sub>2</sub> (0.5)               | 2 h           | 93 <sup>b,c</sup>  |
| 2     | R = H | Pd(OAc) <sub>2</sub> (100)               | 16 h          | 42 <sup>b</sup>    |
| 3     | R = H | Pd <sub>2</sub> (dba) <sub>3</sub> (100) | 16 h          | 0 <sup>d</sup>     |
| 4     | R = H | Pd(OAc) <sub>2</sub> (0.5)               | 30 min        | 98 <sup>c</sup>    |
| 5     | R = H | Pd(OAc) <sub>2</sub> (100)               | 16 h          | 0                  |

<sup>a</sup>Reaction conditions: 0.2 mmol 1,2-dimethylindole and 1.0 equiv. aryldiazonium tetrafluoroborate in 20 mL EtOAc:2-MeTHF (1:1) at rt, open flask; <sup>b</sup>2 h premixing of Pd(OAc)<sub>2</sub> with 1,2-dimethylindole; <sup>c</sup>0.2 M; <sup>d</sup>1 h premixing of Pd<sub>2</sub>(dba)<sub>3</sub> with benzenediazonium tetrafluoroborate; Note: With high palladium loadings, 0.01 M was used to ensure a homogeneous reaction conditions;

In order to characterize the first step of the catalytic cycle (oxidative addition), the following experiments were conducted (Table S5). First, the reaction with 1,2-dimethylindole was repeated with 100 mol % Pd(OAc)<sub>2</sub> (Table S5, entries 1 and 2). As expected, a lower yield of the side product **1bb** was obtained (42% vs 93%) in case of 100 mol % Pd(OAc)<sub>2</sub>. This can be explained by the fact that the uncatalyzed electrophilic substitution is competing with the oxidative addition. In Scheme S2, the competition between the oxidative addition with palladium and the uncatalyzed electrophilic substitution with 1,2-dimethylindole is illustrated:

- Case 1 (Table S5, entry 1): When only 0.5 mol% of Pd(OAc)<sub>2</sub> is used, only a marginal amount (about 0.5 mol %) of the aryldiazonium salt will be occupied in the catalytic cycle (*Pathway A*). Note, that in the latter pathway the catalytic cycle cannot be completed due to the presence of the methyl substituent on the C2 carbon (of 1,2-dimethylindole). Therefore, the leftover aryldiazonium salt can now follow the ‘slower’ *Pathway B*, generating the side-product, hence the high yield of **1bb** (93%).
- Case 2 (Table S5, entry 2): In this case, the aryldiazonium salt will undergo oxidative addition (*Pathway A*). However, due to the observed induction period for the oxidative addition with Pd(II) sources (as previously discussed in the manuscript), *Pathway B* will still be feasible during this induction period. Therefore, it is reasonable that compound **1bb** is still observed, although in a lower amount (42%).



- Case 3 (Table S5, entry 3): When using Pd<sub>2</sub>(dba)<sub>3</sub> it was previously shown (see manuscript) that no induction period was present for the oxidative addition step. Therefore, when conducting the experiment with 100 mol % Pd<sub>2</sub>(dba)<sub>3</sub>, no side product (**1bb**) formation was observed.

In order to further illustrate this observation, we conducted similar experiments with a more reactive aryldiazonium salt. Known from previous results (see manuscript), 4-fluorobenzenediazonium tetrafluoroborate did not show any induction period when using Pd(OAc)<sub>2</sub> as the catalyst. Therefore, the two reactions were conducted, one with 0.5 mol% Pd(OAc)<sub>2</sub> and another with 100 mol % Pd(OAc)<sub>2</sub> (in line with to case 1 and 2). In case of 0.5 mol % Pd(OAc)<sub>2</sub>, 98% of **1cc** was obtained. However, in case of 100 mol % Pd(OAc)<sub>2</sub>, no more side-product was observed (Table 2, entry 4 vs 5). This is in perfect alignment with our hypothesis.

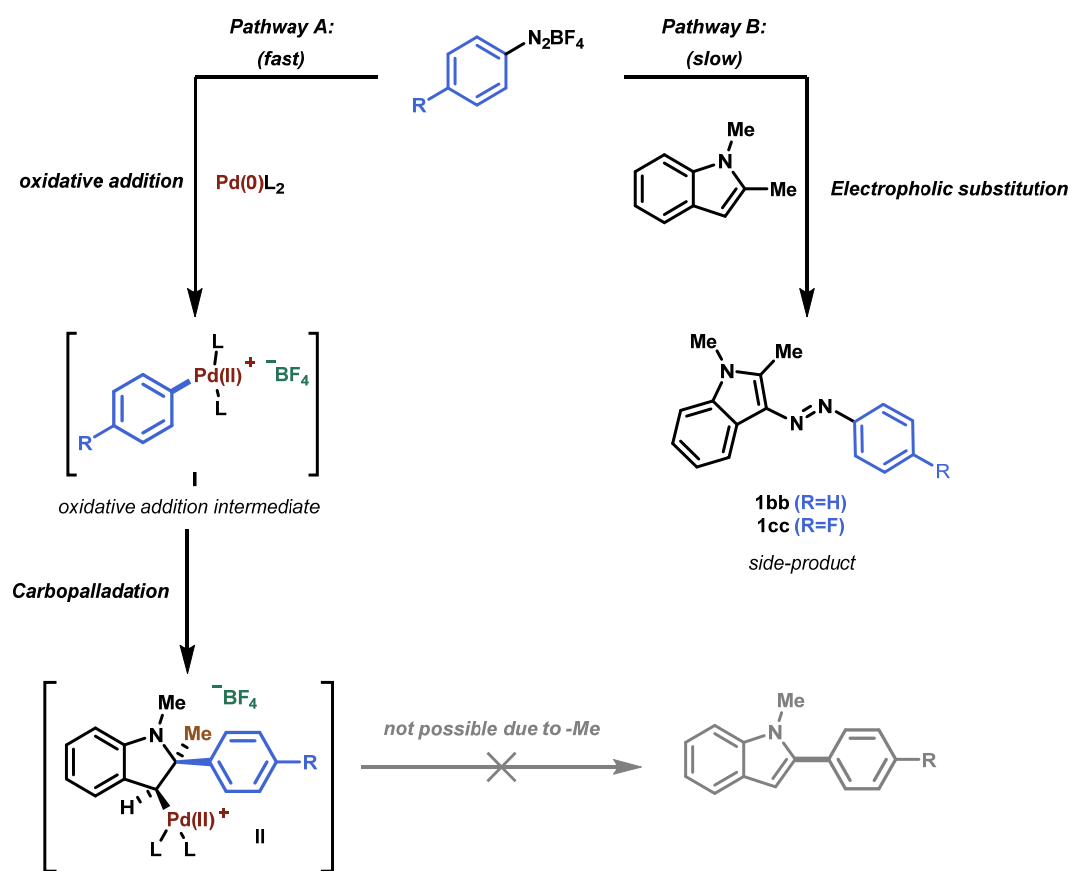

Scheme S 2: Competition reaction between Pathway A and B.

### 3.5 DFT calculations: Computational methods

All calculations were performed using the Gaussian 09 software.<sup>3</sup> Structural optimizations and frequency calculations were performed with  $\omega$ B97X-D along with 6-31G(d) basis set on all atoms except Pd, I and the effective core potential (ECP) SDD on Pd and I atoms. Single point energy calculations were performed with Mo6L functional and def2-TZVP basis set on all atoms. Solvent effects of THF and MeOH were taken into account using the CPCM solvation model.

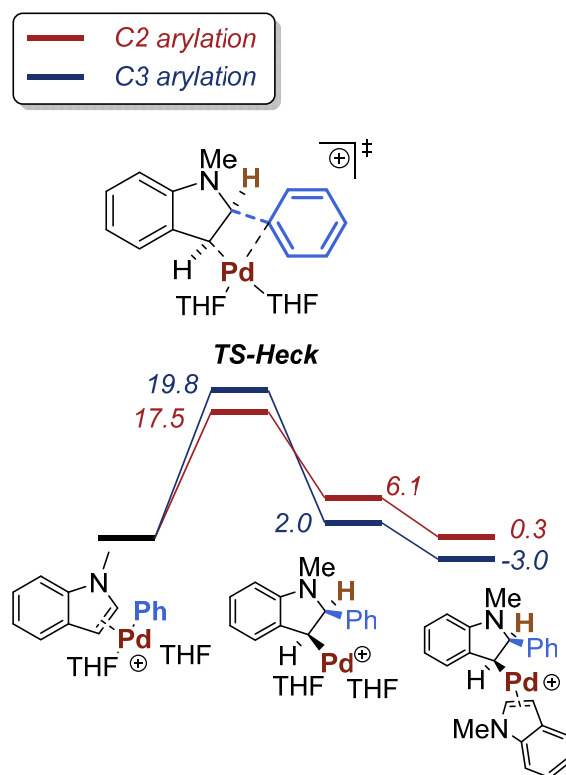

Figure S 9 Comparison of full pathways of the Heck-type carbopalladation of 1-methylindole. Ligand exchange with an additional substrate molecule makes the process thermodynamically feasible.

#### 4. General procedure for the synthesis of aryldiazonium tetrafluoroborates

All aryldiazonium tetrafluoroborates were synthesized by following reported procedures:<sup>4</sup>

General procedure A.

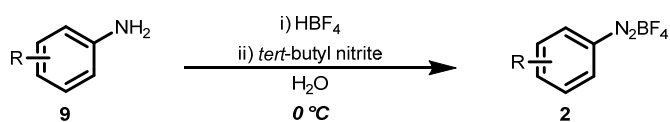

To a suspension of aniline (**9**) (10.0 mmol) in 5 mL water at rt was added HBF<sub>4</sub> (48wt% in water, 3.0 equiv.) and the reaction mixture was stirred for 2 min. The mixture was cooled to 0 °C and a solution of *tert*-butyl nitrite (1.2 equiv.) was added dropwise. After addition, the reaction mixture was stirred at 0 °C for 1 hour. The solids were filtered, washed with ice-cold diethyl ether to give the crude product. Recrystallization was done by dissolving crude product in a minimum of acetone followed by addition of ice-cold diethyl ether. Recrystallization was repeated until white solids were acquired (**2**).

In case the aryldiazonium tetrafluoroborate salt could not be precipitated by following general procedure A, general procedure B was carried out.

General procedure B.

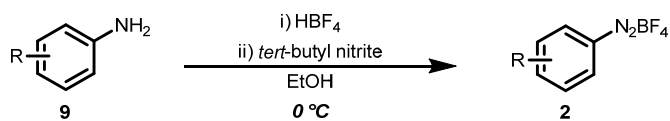

To a solution of aniline **9** (10.0 mmol) in 5 mL ethanol at rt was added HBF<sub>4</sub> (48% in water, 3.0 equiv.) and the reaction mixture was stirred for 2 min. The mixture was cooled to 0 °C and *tert*-butyl nitrite (1.5 equiv.) was added dropwise. After addition, the mixture was stirred at 0 °C for 2 hours. Diethyl ether was added to the reaction mixture and the resulting solids were filtered, washed with diethyl ether (3 x) and dried under high vacuum to give the title product (**2**).

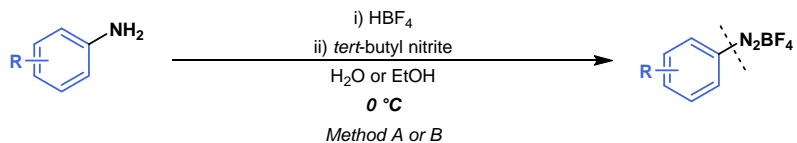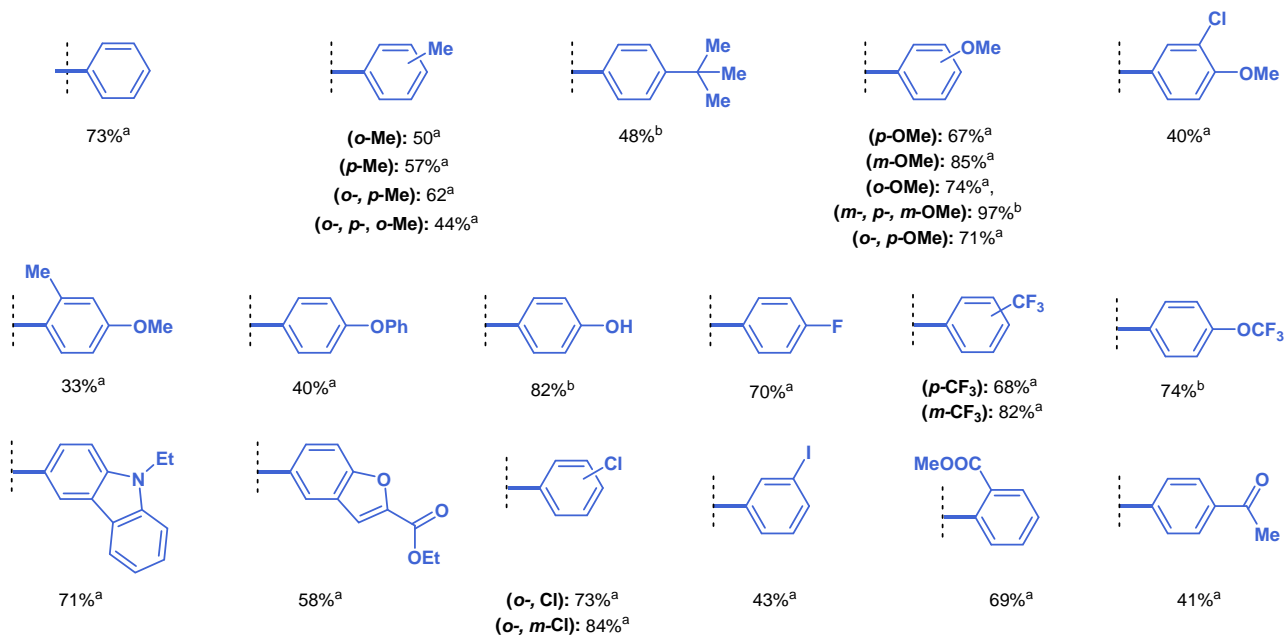

Commercially available

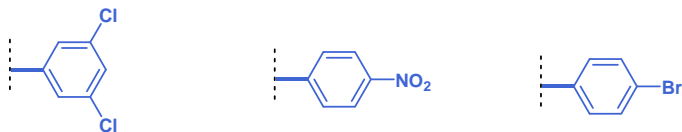

Scheme S 3: Unoptimized isolated yields for the prepared aryldiazonium tetrafluoroborates. <sup>a</sup>general procedure A was used; <sup>b</sup>general procedure B was used.

## 5. General procedure for the Pd-catalyzed C–H arylation of heteroarenes

Table S 6: Summary of conditions used for different substrates

| Condition | Substrate      | Pd(OAc) <sub>2</sub><br>(mol%) | Diazonium<br>salt<br>(equiv.) | Solvent<br>(v:v)       | Premixing<br>(2 h) | TFA<br>(equiv.) | Reflux<br>with ace-<br>tyl chlo-<br>ride | T<br>(°C) |
|-----------|----------------|--------------------------------|-------------------------------|------------------------|--------------------|-----------------|------------------------------------------|-----------|
| A         | 1-methylindole | 0.5                            | 1.0                           | EtOAc:2-MeTHF<br>(1:1) | yes                | -               | No                                       | 25        |
| B         | NH-indole      | 1.0                            | 1.0                           | EtOAc:2-MeTHF<br>(1:1) | yes                | -               | No                                       | 25        |
| C         | Benzofuran     | 0.5                            | 1.2                           | MeOH                   | no                 | 1.0             | Yes                                      | 25        |
| D         | benzothiophene | 2.0                            | 2.0                           | MeOH                   | no                 | 1.0             | No                                       | 40        |

### 5.1 General procedure for the C–H arylation of 1-methylindole and derivatives (condition A)

A stock solution was prepared by weighing Pd(OAc)<sub>2</sub> (5.6 mg, 0.5 mol%) and 1-methylindole (**1a**) (656 mg, 5.0 mmol) into a 50 mL round-bottom flask equipped with stirring bar. 25 mL freshly prepared EtOAc:2-MeTHF (1:1) mixture was added and the resulting solution was stirred for 2 h under air atmosphere at room temperature. Aryldiazonium salt (1.0 mmol, 1.0 equiv.) was weighted into a 20 mL reaction tube equipped with stirring bar. 5 mL of stock solution (containing 1.0 mmol of 1-methylindole and 0.5 mol% Pd(OAc)<sub>2</sub>) was added immediately via syringe. Reaction mixture was stirred vigorously at room temperature until 1-methylindole was completely consumed (monitored by TLC). Reaction was quenched by addition of saturated NaHCO<sub>3</sub> solution. The resulting mixture was moved to the separation funnel. Reaction vial was washed with EtOAc and added to the separating funnel. Layers were separated and the organic layer was washed with saturated aqueous NaHCO<sub>3</sub> and brine solution sequentially. Aqueous phase was washed with EtOAc. Remaining organic phase was dried over MgSO<sub>4</sub>, filtered and concentrated under reduced pressure. Purification by flash chromatography afforded the product. The final product was characterized by <sup>1</sup>H NMR, <sup>13</sup>C NMR, <sup>19</sup>F NMR (if applicable), HRMS, IR and melting point analysis (if applicable).

### 5.2 General procedure for the C–H arylation of NH-indole (conditions B)

A stock solution was prepared by weighing Pd(OAc)<sub>2</sub> (11.2 mg, 1.0 mol%) and NH-indole (**1b**) (586 mg, 5.0 mmol) into a 50 mL round-bottom flask equipped with stirring bar. 25 mL freshly prepared EtOAc:2-MeTHF (1:1) mixture was added and the resulting solution was stirred for 2 h under air atmosphere at room temperature. Aryldiazonium salt (1.0 mmol, 1.0

equiv.) was weighted into a 20 mL reaction tube equipped with stirring bar. 5 mL of stock solution (containing 1.0 mmol of NH-indole and 1.0 mol% Pd(OAc)<sub>2</sub>) was added immediately via syringe. Reaction mixture was stirred vigorously at room temperature until NH-indole was completely consumed (monitored by TLC). Reaction was quenched by addition of saturated NaHCO<sub>3</sub> solution. The resulting mixture was moved to the separation funnel. Reaction vial was washed with EtOAc and added to the separating funnel. Layers were separated and the organic layer was washed with saturated aqueous NaHCO<sub>3</sub> and brine solution sequentially. Aqueous phase was washed with EtOAc. Remaining organic phase was dried over MgSO<sub>4</sub>, filtered and concentrated under reduced pressure. Purification by flash chromatography afforded the product. The final product was characterized by <sup>1</sup>H NMR, <sup>13</sup>C NMR, <sup>19</sup>F NMR (if applicable), HRMS, IR and melting point analysis (if applicable).

### 5.3 General procedure for the C–H arylation of benzofuran (condition C)

A stock solution was prepared by weighing Pd(OAc)<sub>2</sub> (5.6 mg, 0.5 mol%) and benzofuran (**1g**) (591 mg, 5.0 mmol) into a 25 mL volumetric flask. TFA (370 μL, 1.0 equiv.) was added and the volumetric flask was filled up to 25 mL with anhydrous MeOH. Aryldiazonium salt (1.2 mmol, 1.2 equiv.) was weighted into a 20 mL reaction tube equipped with stirring bar. 5 mL of stock solution (containing 1.0 mmol of benzofuran, 0.5 mol% Pd(OAc)<sub>2</sub> and 1.0 equiv. of TFA) was added immediately via syringe. Reaction mixture was stirred vigorously at room temperature until benzofuran was completely consumed (monitored by TLC). Resulting reaction mixture was moved to a 50 mL round-bottom flask and acetyl chloride (350 μL, 5.0 equiv.) was added dropwise. A reflux condenser was mounted on top of the round-bottom flask. The reaction mixture was heated and refluxed for about 15 minutes. After cooling down to room temperature, the reaction was quenched by addition of saturated NaHCO<sub>3</sub> solution. The resulting mixture was moved to the separation funnel. Round-bottom flask was washed with EtOAc and added to the separating funnel. Layers were separated and the organic layer was washed with saturated aqueous NaHCO<sub>3</sub> and brine solution sequentially. Aqueous phase was washed with EtOAc. Remaining organic phase was dried over MgSO<sub>4</sub>, filtered and concentrated under reduced pressure. Purification by flash chromatography afforded the product. The final product was characterized by <sup>1</sup>H NMR, <sup>13</sup>C NMR, <sup>19</sup>F NMR (if applicable), HRMS, IR and melting point analysis (if applicable).

### 5.4 General procedure for the C–H arylation of benzothiophene (condition D)

A stock solution was prepared by weighing Pd(OAc)<sub>2</sub> (22.4 mg, 2.0 mol%) and benzothiophene (**1h**) (671 mg, 5.0 mmol) into a 25 mL volumetric flask. TFA (370 μL, 1.0 equiv.) was added and the volumetric flask was filled up to 25 mL with anhydrous MeOH. Aryldiazonium salt (2.0 mmol, 2.0 equiv.) was weighted into a 20 mL reaction tube equipped with stirring bar. 5 mL of stock solution (containing 1.0 mmol of benzothiophene, 2.0 mol% Pd(OAc)<sub>2</sub> and 1.0 equiv. of TFA) was added immediately via syringe. Reaction mixture was stirred vigorously at 40 °C until benzothiophene was completely consumed (monitored by TLC). The reaction was quenched by addition of saturated NaHCO<sub>3</sub> solution. The resulting

mixture was moved to the separation funnel. Reaction vial was washed with EtOAc and added to the separating funnel. Layers were separated and the organic layer was washed with saturated aqueous NaHCO<sub>3</sub> and brine solution sequentially. Aqueous phase was washed with EtOAc. Remaining organic phase was dried over MgSO<sub>4</sub>, filtered and concentrated under reduced pressure. Purification by flash chromatography afforded the product. The final product was characterized by <sup>1</sup>H NMR, <sup>13</sup>C NMR, <sup>19</sup>F NMR (if applicable), HRMS, IR and melting point analysis (if applicable).

### 5.5 Procedure for the gram scale C–H arylation of 1-methylindole

#### Scheme S 4: Reaction conditions for gram scale C–H arylation of 1-methylindole

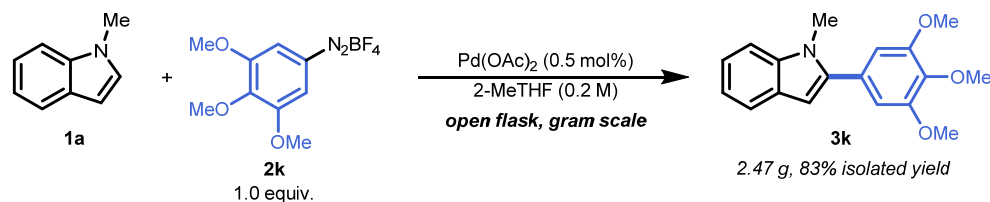

Pd(OAc)<sub>2</sub> (11.2 mg, 0.5 mol%) and 1-methylindole (**1a**) (1.31 g, 10.0 mmol) were weighted into a 250 mL round-bottom flask equipped with stirring bar. 50 mL anhydrous 2-MeTHF was added and the resulting solution was stirred for 2 h under air atmosphere at room temperature. 3,4,5-trimethoxyphenyldiazonium tetrafluoroborate (**2e**) (2.82 g, 1.0 equiv.) was weighted and added to the reaction mixture in portions. Reaction mixture was stirred vigorously at room temperature for 4 hours until 1-methylindole was completely consumed (monitored by TLC). Reaction was quenched by addition of saturated NaHCO<sub>3</sub> solution. The resulting mixture was moved to the separation funnel. Reaction vial was washed with EtOAc and added to the separating funnel. Layers were separated and the organic layer was washed with saturated aqueous NaHCO<sub>3</sub> and brine solution sequentially. Aqueous phase was washed with EtOAc. Remaining organic phase was dried over MgSO<sub>4</sub>, filtered and concentrated under reduced pressure. Purification by flash chromatography on silica (5% EtOAc in petroleum ether) afforded 1-methyl-2-(3,4,5-trimethoxyphenyl)-1H-indole (**3k**) (2.47 g, 83%) as an off-white solid. Mp. 105 °C; <sup>1</sup>H NMR (400 MHz, Chloroform-d) δ 7.64 (dt, J = 8.0, 1.0 Hz, 1H), 7.37 (d, J = 8.0 Hz, 1H), 7.29 – 7.23 (m, 1H), 7.16 (ddd, J = 8.0, 7.1, 1.0 Hz, 1H), 6.72 (s, 2H), 6.56 (s, 1H), 3.94 (s, 3H), 3.92 (s, 6H), 3.77 (s, 3H); <sup>13</sup>C NMR (101 MHz, Chloroform-d) δ 153.5, 141.8, 138.5, 138.3, 128.6, 128.1, 122.0, 120.7, 120.2, 109.9, 107.0, 101.7, 61.3, 56.5, 31.5; IR (ATR, cm<sup>-1</sup>): 2936, 2830, 1582, 1497, 1464, 1412, 1341, 1304, 1236, 1125, 1005; HRMS (ESI) calculated for C<sub>18</sub>H<sub>19</sub>NO<sub>3</sub> [M+H]<sup>+</sup>: 298.1438; found: 298.1441.

## 6. Procedure for synthesis of Sapisartan precursor

### 6.1 Synthesis of 5-methylbenzofuran substrate

Preparation of 1-(2,2-diethoxyethoxy)-4-methylbenzene (**3ab**)<sup>5</sup>

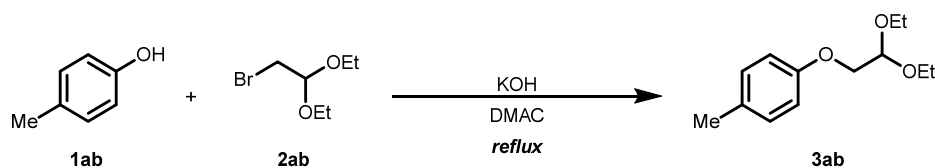

A 250 mL round-bottom flask was charged with p-cresol (**1ab**) (5.4 g, 50 mmol), DMAC (100 mL) and KOH (5.6 g, 100 mmol), followed by adding dropwise 2-bromoacetaldehyde diethyl acetal (**2ab**) (14.8 g, 75 mmol) at room temperature. After the addition, the mixture was stirred under refluxing for 2 hours until the reaction was completed (monitored by TLC). Then the mixture was cooled to room temperature and extracted with EtOAc and saturated brine solution. Next, the organic layer was washed subsequently with 5% NaOH aqueous solution, 10% HCl aqueous solution and saturated NaHCO<sub>3</sub> solution. Remaining organic phase was dried over MgSO<sub>4</sub>, filtered and concentrated under reduced pressure. Purification by flash chromatography on silica (5% EtOAc in petroleum ether) afforded 1-(2,2-diethoxyethoxy)-4-methylbenzene (**3ab**) (10.6 g, 95% yield).

Preparation of 5-methylbenzofuran (**ii**)<sup>6</sup>

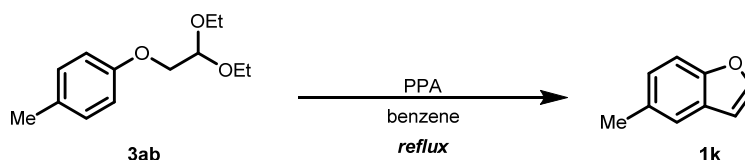

1-(2,2-diethoxyethoxy)-4-methylbenzene (**3ab**) (10.6 g, 47.5 mmol) and poly-phosphoric acid (10.2 g) were combined in 200 mL of benzene and brought to reflux for 2 days. The reaction mixture was cooled to room temperature and extracted with EtOAc and saturated brine solution. Next, the organic layer was washed subsequently with 5% NaOH aqueous solution, 10% HCl aqueous solution and saturated NaHCO<sub>3</sub> solution. Remaining organic phase was dried over MgSO<sub>4</sub>, filtered and concentrated under reduced pressure. Purification by flash chromatography on silica (petroleum ether) afforded 5-methylbenzofuran (**1k**) (2.0 g, 36% yield).

### 6.2 Synthesis of Sapisartan precursor (**8a**)

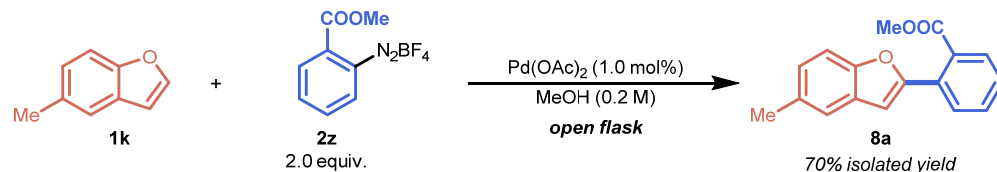

A stock solution was prepared by weighing Pd(OAc)<sub>2</sub> (11.2 mg, 1.0 mol%) and 5-methylbenzofuran (**ii**) (660 mg, 5.0 mmol) into a 25 mL volumetric flask. TFA (370  $\mu$ L, 1.0 equiv.) was added and the volumetric flask was filled up to 25 mL with



anhydrous MeOH. *o*-COOMe-benzenediazonium tetrafluoroborate (**2y**) (2.0 mmol, 2.0 equiv.) was weighted into a 20 mL reaction tube equipped with stirring bar. 5 mL of stock solution (containing 1.0 mmol of 5-methylbenzofuran, 1.0 mol% Pd(OAc)<sub>2</sub> and 1.0 equiv. of TFA) was added immediately via syringe. Reaction mixture was stirred vigorously at 40 °C until 5-methylbenzofuran was completely consumed (2 hours). The reaction was quenched by addition of saturated NaHCO<sub>3</sub> solution. The resulting mixture was moved to the separation funnel. Reaction vial was washed with EtOAc and added to the separating funnel. Layers were separated and the organic layer was washed with saturated aqueous NaHCO<sub>3</sub> and brine solution sequentially. Aqueous phase was washed with EtOAc. Remaining organic phase was dried over MgSO<sub>4</sub>, filtered and concentrated under reduced pressure. Purification by flash chromatography on silica (5% EtOAc in petroleum ether) afforded methyl 2-(5-methylbenzofuran-2-yl)benzoate (**8a**) (186 mg, 70%) as a yellow oil; <sup>1</sup>H NMR (399 MHz, Chloroform-d) δ 7.78 – 7.69 (m, 2H), 7.55 (td, J = 7.6, 1.3 Hz, 1H), 7.44 (td, J = 7.6, 1.3 Hz, 1H), 7.41 – 7.36 (m, 2H), 7.12 (dd, J = 8.4, 1.4 Hz, 1H), 6.87 (s, 1H), 3.82 (s, 3H), 2.46 (s, 3H); <sup>13</sup>C NMR (100 MHz, Chloroform-d) δ 169.6, 154.8, 153.7, 132.5, 131.1, 131.0, 129.8, 129.4, 129.1, 129.0, 128.6, 126.0, 121.1, 110.7, 104.3, 52.6, 21.5; IR (ATR, cm<sup>-1</sup>): 2949, 2920, 1726, 1449, 1289, 1265, 1123, 1090, 918, 754; HRMS (ESI) calculated for C<sub>17</sub>H<sub>14</sub>O<sub>3</sub> [M+H]<sup>+</sup>: 267.1016; found: 267.1016.

## 7. Characterization data for the Pd-catalyzed C–H arylated heteroarenes

### 1-methyl-2-phenyl-1*H*-indole (3a)<sup>7</sup>

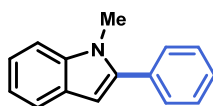

3a, 90% (1h)

Reaction conditions: 1.0 mmol scale, method A, 1 h reaction time; Purification by flash chromatography on silica (2% diethylether in petroleum ether) afforded 1-methyl-2-phenyl-1*H*-indole (186 mg, 90%) as white solids; Mp. 101 °C; <sup>1</sup>H-NMR (399 MHz, Chloroform-*d*) δ 7.63 (d, *J* = 7.8 Hz, 1H), 7.54 – 7.47 (m, 2H), 7.46 (t, *J* = 7.4 Hz, 2H), 7.42 – 7.33 (m, 2H), 7.23 (d, *J* = 7.8 Hz, 1H), 7.14 (t, *J* = 7.4 Hz, 1H), 6.56 (s, 1H), 3.74 (s, 3H); <sup>13</sup>C-NMR (100 MHz, Chloroform-*d*) δ 141.7, 138.4, 133.0, 129.5, 128.6, 128.1, 128.0, 121.8, 120.6, 120.0, 109.7, 101.8, 31.3; IR (ATR, cm<sup>-1</sup>): 3055, 2920, 2850, 1602, 1468, 1340, 1308, 796, 765, 748; HRMS (ESI) calculated for C<sub>15</sub>H<sub>14</sub>N [M+H]<sup>+</sup>: 208.1121; found: 208.1120.

### 1,3-dimethyl-2-phenyl-1*H*-indole (3b)<sup>8</sup>

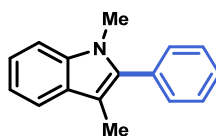

3b, 80% (1h)

Reaction conditions: 1.0 mmol scale, method A, 1 h reaction time; Purification by flash chromatography on silica (petroleum ether) afforded 1,3-dimethyl-2-phenyl-1*H*-indole (176 mg, 80%) as colorless oil; <sup>1</sup>H NMR (400 MHz, Chloroform-*d*) δ 7.65 (d, *J* = 7.9 Hz, 1H), 7.53 (t, *J* = 7.6 Hz, 2H), 7.45 (t, *J* = 6.8 Hz, 3H), 7.37 (d, *J* = 8.1 Hz, 1H), 7.30 (t, *J* = 7.6 Hz, 1H), 7.20 (t, *J* = 7.6 Hz, 1H), 3.65 (s, 3H), 2.33 (s, 3H); <sup>13</sup>C NMR (100 MHz, Chloroform-*d*) δ 137.8, 137.3, 132.3, 130.8, 128.6, 128.45, 127.9, 121.9, 119.2, 118.9, 109.4, 108.7, 31.1, 9.5; IR (ATR, cm<sup>-1</sup>): 3049, 2914, 1468, 1354, 1236, 1005, 818, 737, 700; HRMS (ESI) calculated for C<sub>16</sub>H<sub>16</sub>N [M+H]<sup>+</sup>: 222.1277; found: 222.1275.

### 1-methyl-2-(2-methylphenyl)-1*H*-indole (3c)<sup>9</sup>

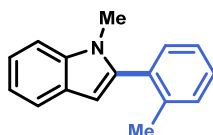

3c, 65% (1h)

Reaction conditions: 1.0 mmol scale, method A, 1 h reaction time; Purification by flash chromatography on silica (petroleum ether) afforded 1-methyl-2-(2-methylphenyl)-1*H*-indole (144 mg, 65%) as a yellowish solid; Mp. 90 °C; <sup>1</sup>H NMR (400 MHz, Chloroform-*d*) δ 7.83 (dd, *J* = 7.7, 1.0 Hz, 1H), 7.55 – 7.39 (m, 6H), 7.34 (td, *J* = 7.2, 1.0 Hz, 1H), 6.62 (s, 1H), 3.66 (s, 3H), 2.38 (s, 3H); <sup>13</sup>C NMR (101 MHz, Chloroform-*d*) δ 140.6, 138.2, 137.4, 132.7, 131.3, 130.2, 128.8, 128.1, 125.7, 121.4, 120.5,

119.8, 109.6, 101.7, 30.4, 20.2; IR (ATR, cm<sup>-1</sup>): 3419.8, 3053.7, 2954.6, 1603.3, 1573.1, 1465.5, 1431.4, 1360.2, 1336.7, 1313.5, 1274.2, 1235.0; HRMS (ESI) calculated for C<sub>16</sub>H<sub>16</sub>N [M+H]<sup>+</sup>: 222.1278; found: 222.1275.

### 1-methyl-2-(*p*-tolyl)-1*H*-indole (3d)<sup>7</sup>

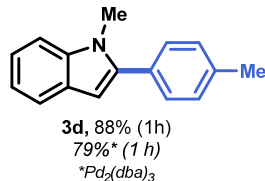

Reaction conditions: 1.0 mmol scale, method A, 1 h reaction time; Purification by flash chromatography on silica (1% diethyl ether in *n*-heptane) afforded 1-methyl-2-(*p*-tolyl)-1*H*-indole (195 mg, 88%) as white solids; Mp. 97 °C; <sup>1</sup>H NMR (500 MHz, Chloroform-d) δ 7.65 (dt, *J* = 7.8, 1.0 Hz, 1H), 7.45 – 7.40 (m, 2H), 7.37 (d, *J* = 8.2 Hz, 1H), 7.33 – 7.21 (m, 3H), 7.16 (ddd, *J* = 8.0, 7.1, 1.0 Hz, 1H), 6.56 (s, 1H), 3.75 (s, 3H), 2.44 (s, 3H); <sup>13</sup>C NMR (101 MHz, Chloroform-d) δ 141.8, 138.4, 137.9, 130.1, 129.5, 129.4, 128.2, 121.7, 120.5, 120.1, 109.7, 101.5, 31.3, 21.5; IR (ATR, cm<sup>-1</sup>): 3051, 3022, 2920, 1464, 1383, 1338, 1317, 827, 773, 734; HRMS (ESI) calculated for C<sub>16</sub>H<sub>16</sub>N [M+H]<sup>+</sup>: 222.1277; found: 222.1272.

### 2-(2',4'-dimethylphenyl)-1-methyl-1*H*-indole (3e)

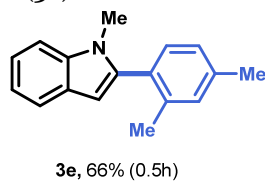

Reaction conditions: 1.0 mmol scale, method A, 0.5 h reaction time; Purification by flash chromatography on silica (petroleum ether) afforded 2-(2',4'-dimethylphenyl)-1-methyl-1*H*-indole (155 mg, 66%) as a yellowish solid; Mp. 80 °C; <sup>1</sup>H NMR (400 MHz, Chloroform-d) δ 7.70 (d, *J* = 7.9 Hz, 1H), 7.41 (d, *J* = 8.1 Hz, 1H), 7.35 – 7.18 (m, 4H), 7.14 (d, *J* = 7.7 Hz, 1H), 6.48 (s, 1H), 3.57 (s, 3H), 2.46 (s, 3H), 2.23 (s, 3H); <sup>13</sup>C NMR (101 MHz, Chloroform-d) δ 140.6, 138.5, 137.9, 137.4, 131.1, 130.94, 129.7, 128.1, 126.4, 121.3, 120.4, 119.7, 109.5, 101.6, 30.3, 21.6, 20.1; IR (ATR, cm<sup>-1</sup>): 3042, 2918, 2853, 1466, 1377, 1362, 1335, 1312, 1130, 1003; HRMS (ESI) calculated for C<sub>17</sub>H<sub>18</sub>N [M+H]<sup>+</sup>: 236.1434; found: 236.1433.

### 2-mesityl-1-methyl-1*H*-indole (3f - C-2)

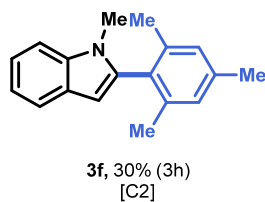

Reaction conditions: 1.0 mmol scale, slightly modified method A (1.0 mol% Pd, 1.2 equiv. aryldiazonium salt), 3 h reaction time; Purification by flash chromatography on silica (1% ethyl acetate in petroleum ether) afforded 2-mesityl-1-methyl-1*H*-

indole (76 mg, 30%) as white solids; Mp. 84 °C; <sup>1</sup>H NMR (399 MHz, Chloroform-d) δ 7.67 (d, *J* = 8.1 Hz, 1H), 7.38 (d, *J* = 8.1 Hz, 1H), 7.26 (td, *J* = 8.1, 7.0, 0.8 Hz, 1H), 7.17 (td, *J* = 8.1, 7.0, 0.8 Hz, 1H), 7.01 (s, 2H), 6.37 (s, 1H), 3.45 (s, 3H), 2.39 (s, 3H), 2.06 (s, 6H); <sup>13</sup>C NMR (100 MHz, Chloroform-d) δ 139.3, 138.8, 138.5, 137.2, 129.5, 128.5, 128.2, 121.0, 120.5, 119.5, 109.5, 101.1, 29.8, 21.4, 20.5; IR (ATR, cm<sup>-1</sup>): 3053, 2918, 2853, 1612, 1464, 1335, 1310, 856, 779, 748; HRMS (ESI) calculated for C<sub>18</sub>H<sub>20</sub>N [M+H]<sup>+</sup>: 250.1591; found: 250.1597.

### 3-mesityl-1-methyl-1*H*-indole (**3f** - C-3)<sup>10</sup>

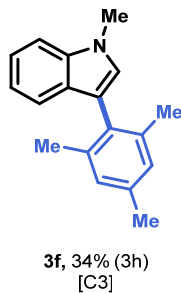

Reaction conditions: 1.0 mmol scale, slightly modified method A (1.0 mol% Pd, 1.2 equiv. aryldiazonium salt), 3 h reaction time; Purification by flash chromatography on silica (1% ethyl acetate in petroleum ether) afforded 3-mesityl-1-methyl-1*H*-indole (84 mg, 34%) as off-white solids; Mp. 106 °C; <sup>1</sup>H NMR (399 MHz, Chloroform-d) δ 7.38 (d, *J* = 8.2 Hz, 1H), 7.29 – 7.23 (m, 2H), 7.11 – 7.05 (m, 1H), 7.00 (s, 2H), 6.89 (s, 1H), 3.86 (s, 3H), 2.37 (s, 3H), 2.09 (s, 6H); <sup>13</sup>C NMR (100 MHz, Chloroform-d) δ 138.6, 137.0, 136.6, 131.2, 128.1, 128.0, 127.3, 121.6, 120.2, 119.2, 114.4, 109.3, 33.0, 29.9, 21.1; IR (ATR, cm<sup>-1</sup>): 2916, 2849, 1549, 1462, 1371, 1323, 1223, 847, 740; HRMS (ESI) calculated for C<sub>18</sub>H<sub>20</sub>N [M+H]<sup>+</sup>: 250.1591; found: 250.1591.

### 2-(4-(*tert*-butyl)phenyl)-1-methyl-1*H*-indole (**3g**)<sup>11</sup>

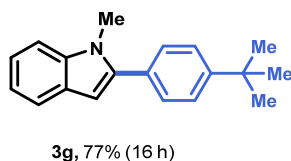

Reaction conditions: 1.0 mmol scale, method A, 16 h reaction time; Purification by flash chromatography on silica (2% diethyl ether in n-heptane) afforded 2-(4-(*tert*-butyl)phenyl)-1-methyl-1*H*-indole (202 mg, 77%) as white solids; Mp. 115 °C; <sup>1</sup>H NMR (400 MHz, Chloroform-d) δ 7.67 (d, *J* = 7.8 Hz, 1H), 7.51 (q, *J* = 8.5 Hz, 4H), 7.39 (d, *J* = 8.1 Hz, 1H), 7.32 – 7.23 (m, 1H), 7.17 (t, *J* = 7.4 Hz, 1H), 6.58 (s, 1H), 3.79 (s, 3H), 1.42 (s, 9H); <sup>13</sup>C NMR (101 MHz, Chloroform-d) δ 151.1, 141.8, 138.5, 130.1, 129.2, 128.2, 125.6, 121.7, 120.5, 112.0, 109.7, 101.5, 34.9, 31.5, 31.4; IR (ATR, cm<sup>-1</sup>): 3049, 2961, 2864, 1466, 1360, 1339, 1165, 847, 781, 737; HRMS (ESI) calculated for C<sub>19</sub>H<sub>22</sub>N [M+H]<sup>+</sup>: 264.1747; found: 264.1740.

### 2-(4-methoxyphenyl)-1-methyl-1*H*-indole (**3h**)<sup>7</sup>

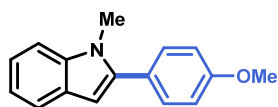

**3h**, 82% (2h)

Reaction conditions: 1.0 mmol scale, method A, 2 h reaction time; Purification by flash chromatography on silica (4% diethyl ether in petroleum ether) afforded 2-(4-methoxyphenyl)-1-methyl-1*H*-indole (194mg, 82%) as white solids; Mp. 120 °C; <sup>1</sup>H NMR (400 MHz, Chloroform-*d*) δ 7.62 (d, *J* = 7.8 Hz, 1H), 7.44 (d, *J* = 8.8 Hz, 2H), 7.35 (d, *J* = 8.2 Hz, 1H), 7.22 (td, *J* = 7.9, 7.0, 1.1 Hz, 1H), 7.13 (td, *J* = 7.7, 6.9, 1.0 Hz, 1H), 7.01 (d, *J* = 8.8 Hz, 2H), 6.50 (s, 1H), 3.87 (s, 3H), 3.73 (s, 3H); <sup>13</sup>C NMR (101 MHz, Chloroform-*d*) δ 159.6, 141.6, 138.3, 130.8, 128.2, 125.4, 121.6, 120.4, 119.9, 114.1, 109.7, 101.2, 55.5, 31.2; IR (ATR, cm<sup>-1</sup>): 3007, 2939, 2835, 1606, 1494, 1452, 1285, 1242, 1178, 744; HRMS (ESI) calculated for C<sub>16</sub>H<sub>15</sub>NO [M+H]<sup>+</sup>: 238.1227; found: 238.1230.

2-(3-methoxyphenyl)-1-methyl-1*H*-indole (**3i**)<sup>12</sup>

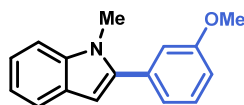

**3i**, 71% (1h)

Reaction conditions: 1.0 mmol scale, method A, 1 h reaction time; Purification by flash chromatography on silica (2% diethyl ether in petroleum ether) afforded 2-(3-methoxyphenyl)-1-methyl-1*H*-indole (168 mg, 71%) as a greenish solid; Mp. 63 °C; <sup>1</sup>H NMR (400 MHz, Chloroform-*d*) δ 7.67 (d, *J* = 8.0 Hz, 1H), 7.45 – 7.36 (m, 2H), 7.31 – 7.25 (m, 1H), 7.20 – 7.16 (m, 1H), 7.13 (dt, *J* = 8.0, 1.1 Hz, 1H), 7.10 – 7.08 (m, 1H), 7.00 – 6.96 (m, 1H), 6.61 (s, 1H), 3.89 (s, 3H), 3.78 (s, 3H); <sup>13</sup>C NMR (101 MHz, Chloroform-*d*) δ 159.8, 141.6, 138.5, 134.3, 129.7, 128.1, 122.0, 121.9, 120.7, 120.1, 115.2, 113.5, 109.8, 101.9, 55.5, 31.4; IR (ATR, cm<sup>-1</sup>): 2938, 1738, 1603, 1578, 1464, 1339, 1283, 1233, 1161, 1047; HRMS (ESI) calculated for C<sub>16</sub>H<sub>16</sub>NO [M+H]<sup>+</sup>: 238.1227; found: 238.1227.

2-(2-methoxyphenyl)-1-methyl-1*H*-indole (**3j**)<sup>13</sup>

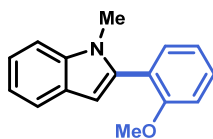

**3j**, 90% (2h)

Reaction conditions: 1.0 mmol scale, method A, 2 h reaction time; Purification by flash chromatography on silica (2% diethyl ether in petroleum ether) afforded 2-(2-methoxyphenyl)-1-methyl-1*H*-indole (214 mg, 90%) as a pink solid; Mp. 108 °C; <sup>1</sup>H NMR (400 MHz, Chloroform-*d*) δ 7.54 (ddd, *J* = 8.0, 1.2, 0.8 Hz, 1H), 7.34 – 7.23 (m, 3H), 7.13 (ddd, *J* = 8.3, 7.0, 1.1 Hz, 1H), 7.02 (ddd, *J* = 8.0, 7.0, 1.1 Hz, 1H), 6.94 (td, *J* = 7.5, 1.1 Hz, 1H), 6.89 (dd, *J* = 8.3, 1.0 Hz, 1H), 6.40 (s, 1H), 3.68 (s, 3H),

3.47 (s, 3H);  $^{13}\text{C}$  NMR (101 MHz, Chloroform- $d$ )  $\delta$  157.6, 138.7, 137.7, 132.6, 130.2, 128.1, 122.1, 121.4, 120.8, 120.5, 119.5, 111.0, 109.5, 101.8, 55.6, 30.8; IR (ATR,  $\text{cm}^{-1}$ ): 3049, 2936, 1738, 1464, 1435, 1339, 1312, 1246, 1115, 1024, 777, 746; HRMS (ESI) calculated for  $\text{C}_{16}\text{H}_{16}\text{NO}$   $[\text{M}+\text{H}]^+$ : 238.1226; found: 238.1224.

#### 1-methyl-2-(3,4,5-trimethoxyphenyl)-1H-indole (3k)<sup>14</sup>

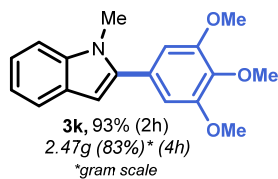

Reaction conditions: 1.0 mmol scale, method A, 2 h reaction time; Purification by flash chromatography on silica (10% ethyl acetate in petroleum ether) afforded 1-methyl-2-(3,4,5-trimethoxyphenyl)-1H-indole (277 mg, 93%) as a white solid; Mp. 105 °C;  $^1\text{H}$  NMR (400 MHz, Chloroform- $d$ )  $\delta$  7.64 (dt,  $J$  = 8.0, 1.0 Hz, 1H), 7.37 (d,  $J$  = 8.0 Hz, 1H), 7.29 – 7.23 (m, 1H), 7.16 (ddd,  $J$  = 8.0, 7.1, 1.0 Hz, 1H), 6.72 (s, 2H), 6.56 (s, 1H), 3.94 (s, 3H), 3.92 (s, 6H), 3.77 (s, 3H);  $^{13}\text{C}$  NMR (101 MHz, Chloroform- $d$ )  $\delta$  153.5, 141.8, 138.5, 138.3, 128.6, 128.1, 122.0, 120.7, 120.2, 109.9, 107.0, 101.7, 61.3, 56.5, 31.5; IR (ATR,  $\text{cm}^{-1}$ ): 2936, 2830, 1582, 1497, 1464, 1412, 1341, 1304, 1236, 1125, 1005; HRMS (ESI) calculated for  $\text{C}_{18}\text{H}_{20}\text{NO}_3$   $[\text{M}+\text{H}]^+$ : 298.1438; found: 298.1441.

#### 2-(2,4-dimethoxyphenyl)-1-methyl-1H-indole (3l)

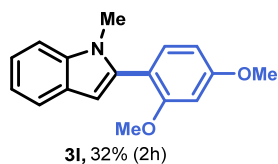

Reaction conditions: 1.0 mmol scale, method A, 2 h reaction time; Purification by flash chromatography on silica (4% diethyl ether in petroleum ether) afforded 2-(2,4-dimethoxyphenyl)-1-methyl-1H-indole (86 mg, 32%) as a greenish solid; Mp. 125 °C;  $^1\text{H}$  NMR (400 MHz, Chloroform- $d$ )  $\delta$  7.65 (d,  $J$  = 7.9 Hz, 1H), 7.37 (d,  $J$  = 7.9 Hz, 1H), 7.33 – 7.28 (m, 1H), 7.27 – 7.22 (m, 1H), 7.14 (t,  $J$  = 7.4 Hz, 1H), 6.64 – 6.58 (m, 2H), 6.48 (s, 1H), 3.90 (s, 3H), 3.81 (s, 3H), 3.60 (s, 3H);  $^{13}\text{C}$  NMR (101 MHz, Chloroform- $d$ )  $\delta$  161.8, 158.9, 138.8, 137.8, 133.3, 128.2, 121.3, 120.6, 119.6, 115.0, 109.5, 104.7, 101.7, 98.9, 55.7, 55.6, 30.9; IR (ATR,  $\text{cm}^{-1}$ ): 2938, 2835, 1738, 1611, 1464, 1300, 1206, 1157, 1030, 833; HRMS (ESI) calculated for  $\text{C}_{17}\text{H}_{18}\text{NO}_2$   $[\text{M}+\text{H}]^+$ : 268.1332; found: 268.1332.

#### 2-(3-chloro-4-methoxyphenyl)-1-methyl-1H-indole (3m)

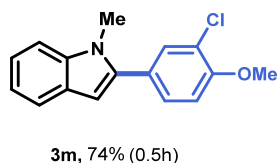

Reaction conditions: 1.0 mmol scale, method A, 0.5 h reaction time; Purification by flash chromatography on silica (4% diethyl ether in petroleum ether) afforded 2-(3-chloro-4-methoxyphenyl)-1-methyl-1*H*-indole (200 mg, 74%) as a white solid; Mp. 119 °C; <sup>1</sup>H NMR (400 MHz, Chloroform-*d*) δ 7.65 (dt, *J* = 8.0, 1.0 Hz, 1H), 7.55 (d, *J* = 2.1 Hz, 1H), 7.40 – 7.35 (m, 2H), 7.27 (ddd, *J* = 8.0, 7.0, 1.0 Hz, 1H), 7.17 (ddd, *J* = 8.0, 7.0, 1.0 Hz, 1H), 7.03 (d, *J* = 8.5 Hz, 1H), 6.54 (s, 1H), 3.98 (s, 3H), 3.74 (s, 3H); <sup>13</sup>C NMR (101 MHz, Chloroform-*d*) δ 155.0, 140.1, 138.4, 131.2, 128.9, 128.0, 126.4, 122.7, 121.9, 120.6, 120.1, 112.1, 109.8, 101.8, 56.4, 31.3; IR (ATR, cm<sup>-1</sup>): 3055, 2926, 2839, 1491, 1464, 1431, 1288, 1256, 1063, 1020; HRMS (ESI) calculated for C<sub>16</sub>H<sub>15</sub>ClNO [M+H]<sup>+</sup>: 272.0837; found: 272.0831.

2-(4-methoxy-2-methylphenyl)-1-methyl-1*H*-indole (3n)

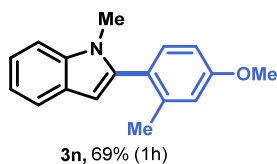

Reaction conditions: 1.0 mmol scale, method A, 1 h reaction time; Purification by flash chromatography on silica (2% diethyl ether in petroleum ether) afforded 2-(4-methoxy-2-methylphenyl)-1-methyl-1*H*-indole (176 mg, 69%) as a white solid; Mp. 95 °C; <sup>1</sup>H NMR (400 MHz, Chloroform-*d*) δ 7.66 (dt, *J* = 7.5, 1.0 Hz, 1H), 7.37 (d, *J* = 8.3 Hz, 1H), 7.30 – 7.22 (m, 2H), 7.17 (td, *J* = 7.5, 7.1, 1.1 Hz, 1H), 6.90 (d, *J* = 2.7 Hz, 1H), 6.84 (dd, *J* = 8.3, 2.7 Hz, 1H), 6.44 (s, 1H), 3.88 (s, 3H), 3.53 (s, 3H), 2.21 (s, 3H); <sup>13</sup>C NMR (101 MHz, Chloroform-*d*) δ 160.0, 140.5, 139.8, 137.4, 132.4, 128.2, 125.1, 121.3, 120.4, 119.7, 115.6, 111.1, 109.5, 101.7, 55.5, 30.4, 20.5; IR (ATR, cm<sup>-1</sup>): 3001, 2938, 1738, 1609, 1464, 1366, 1292, 1234, 1207, 1161; HRMS (ESI) calculated for C<sub>17</sub>H<sub>18</sub>NO [M+H]<sup>+</sup>: 252.1383; found: 252.1379.

1-methyl-2-(4-phenoxyphenyl)-1*H*-indole (3o)

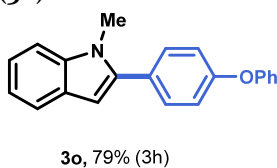

Reaction conditions: 1.0 mmol scale, method A, 3 h reaction time; Purification by flash chromatography on silica (2% diethyl ether in petroleum ether) afforded 1-methyl-2-(4-phenoxyphenyl)-1*H*-indole (236 mg, 79%) as a white solid; Mp. 85 °C; <sup>1</sup>H NMR (400 MHz, Chloroform-*d*) δ 7.65 (d, *J* = 7.6 Hz, 1H), 7.52 – 7.46 (m, 2H), 7.44 – 7.35 (m, 3H), 7.27 (t, *J* = 7.6 Hz, 1H), 7.21 – 7.06 (m, 6H), 6.56 (s, 1H), 3.77 (s, 3H); <sup>13</sup>C NMR (101 MHz, Chloroform-*d*) δ 157.6, 156.9, 141.2, 138.4, 131.0, 130.1, 128.1, 127.8, 123.9, 121.8, 120.6, 120.0, 119.6, 118.6, 109.7, 101.6, 31.3; IR (ATR, cm<sup>-1</sup>): 3017, 2926, 1738, 1589, 1487, 1364, 1231, 1165, 783, 750; HRMS (ESI) calculated for C<sub>21</sub>H<sub>18</sub>NO [M+H]<sup>+</sup>: 300.1383; found: 300.1375.

2-(4'-hydroxyphenyl)-1-methyl-1*H*-indole (3p)<sup>15</sup>

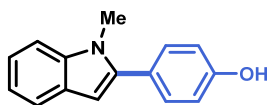

**3p**, 16% (2h)

Reaction conditions: 1.0 mmol scale, method A, 2 h reaction time; Purification by flash chromatography on silica (25% ethyl acetate in petroleum ether) afforded 2-(4'-hydroxyphenyl)-1-methyl-1H-indole (35 mg, 16%) as orange solid; Mp. 109 °C; <sup>1</sup>H NMR (399 MHz, Chloroform-d) δ 7.65 (d, J = 7.8 Hz, 1H), 7.43 – 7.35 (m, 3H), 7.30 – 7.23 (m, 1H), 7.17 (t, J = 7.4 Hz, 1H), 6.95 – 6.90 (m, 2H), 6.52 (s, 1H), 5.05 (s, 1H), 3.73 (s, 3H); <sup>13</sup>C NMR (100 MHz, Chloroform-d) δ 155.5, 141.5, 138.2, 131.0, 128.1, 125.6, 121.6, 120.4, 119.9, 115.6, 109.7, 101.1, 31.2; IR (ATR, cm<sup>-1</sup>): 3447, 3053, 2945, 1612, 1548, 1497, 1465, 1260, 1240, 1171; HRMS (ESI) calculated for C<sub>15</sub>H<sub>14</sub>NO [M+H]<sup>+</sup>: 224.1070; found: 224.1076.

### 9-ethyl-3-(1'-methyl-1'H-indol-2'-yl)-9H-carbazole (3q)

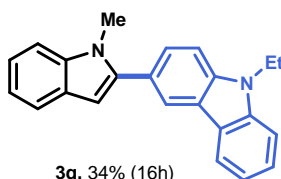

**3q**, 34% (16h)

Reaction conditions: 1.0 mmol scale, method A, 16 h reaction time; Purification by flash chromatography on silica (1% ethyl acetate in petroleum ether) afforded 9-ethyl-3-(1'-methyl-1'H-indol-2'-yl)-9H-carbazole (110 mg, 34%) as yellow solids; Mp. 137 °C; <sup>1</sup>H NMR (400 MHz, Chloroform-d) δ 8.25 (d, J = 1.2 Hz, 1H), 8.16 (d, J = 7.7 Hz, 1H), 7.69 (d, J = 7.7 Hz, 1H), 7.63 (dd, J = 8.4, 1.7 Hz, 1H), 7.57 – 7.45 (m, 3H), 7.42 (d, J = 8.2 Hz, 1H), 7.34 – 7.24 (m, 2H), 7.22 – 7.16 (m, 1H), 6.65 (s, 1H), 4.44 (q, J = 7.2 Hz, 2H), 3.82 (s, 3H), 1.51 (t, J = 7.2 Hz, 3H). <sup>13</sup>C NMR (101 MHz, Chloroform-d) δ 142.9, 140.5, 139.7, 138.3, 128.3, 127.4, 126.2, 123.6, 123.2, 122.9, 121.6, 121.4, 120.7, 120.4, 119.9, 119.3, 109.7, 108.8, 108.5, 101.4, 37.8, 31.3, 14.0; IR (ATR, cm<sup>-1</sup>): 3049, 2945, 2891, 1626, 1601, 1458, 1429, 1340, 1281, 1229, 789, 737; HRMS (ESI) calculated for C<sub>23</sub>H<sub>21</sub>N<sub>2</sub> [M+H]<sup>+</sup>: 325.1700; found: 325.1700.

### Ethyl 5-(1-methyl-1H-indol-2-yl)benzofuran-2-carboxylate (3r)

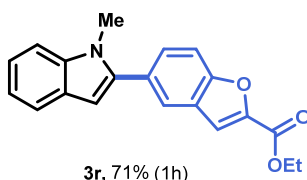

**3r**, 71% (1h)

Reaction conditions: 1.0 mmol scale, method A, 1 h reaction time; Purification by flash chromatography on silica (5% ethyl acetate in petroleum ether) afforded ethyl 5-(1-methyl-1H-indol-2-yl)benzofuran-2-carboxylate (227 mg, 71%) as off-white solids; Mp. 113 °C; <sup>1</sup>H NMR (399 MHz, Chloroform-d) δ 7.80 (d, J = 1.5 Hz, 1H), 7.68 (dd, J = 13.2, 8.2 Hz, 2H), 7.62 – 7.57 (m,



2H), 7.39 (d,  $J = 8.2$  Hz, 1H), 7.29 (dd,  $J = 7.0, 1.1$  Hz, 1H), 7.21 – 7.14 (m, 1H), 6.59 (s, 1H), 4.49 (q,  $J = 7.1$  Hz, 2H), 3.75 (s, 3H), 1.46 (t,  $J = 7.1$  Hz, 3H);  $^{13}\text{C}$  NMR (100 MHz, Chloroform- $d$ )  $\delta$  159.6, 155.5, 146.7, 141.2, 138.4, 129.4, 129.0, 128.1, 127.4, 123.7, 122.0, 120.6, 120.1, 113.9, 112.6, 109.8, 102.2, 61.9, 31.3, 14.5; IR (ATR,  $\text{cm}^{-1}$ ): 3094, 2922, 2853, 1730, 1570, 1373, 1335, 1300, 1237, 1200; HRMS (ESI) calculated for  $\text{C}_{20}\text{H}_{18}\text{NO}_3$   $[\text{M}+\text{H}]^+$ : 320.1281; found: 320.1284.

### 2-(4-fluorophenyl)-1-methyl-1H-indole (3s)<sup>11</sup>

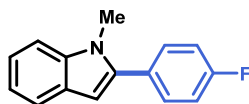

3s, 87% (20 min)

Reaction conditions: 1.0 mmol scale, method A, 20 min reaction time; Purification by flash chromatography on silica (1% ethyl acetate in petroleum ether) afforded 2-(4-fluorophenyl)-1-methyl-1H-indole (196 mg, 87%) as a white solid; Mp. 119 °C;  $^1\text{H}$  NMR (400 MHz, Chloroform- $d$ )  $\delta$  7.66 (dt,  $J = 7.8, 0.9$  Hz, 1H), 7.52 – 7.47 (m, 2H), 7.39 (dd,  $J = 8.2, 1.2$  Hz, 1H), 7.29 (ddd,  $J = 8.2, 7.0, 1.2$  Hz, 1H), 7.23 – 7.15 (m, 3H), 6.56 (d,  $J = 0.6$  Hz, 1H), 3.74 (s, 3H);  $^{13}\text{C}$  NMR (101 MHz, Chloroform- $d$ )  $\delta$  162.8 (d,  $J = 246.2$  Hz), 140.6, 138.4, 131.2 (d,  $J = 8.0$  Hz), 129.1 (d,  $J = 3.4$  Hz), 128.0, 122.0, 120.6, 120.1, 115.7 (d,  $J = 21.5$  Hz), 109.8, 101.9, 31.2;  $^{19}\text{F}$  NMR (282 MHz, Chloroform- $d$ )  $\delta$  -113.72 – -113.90 (m); IR (ATR,  $\text{cm}^{-1}$ ): 3026, 1738, 1495, 1464, 1366, 1217, 1155, 841, 787, 731; HRMS (ESI) calculated for  $\text{C}_{15}\text{H}_{13}\text{FN}$   $[\text{M}+\text{H}]^+$ : 226.1027; found: 226.1022.

### 1,3-dimethyl-2-(3-(trifluoromethyl)phenyl)-1H-indole (3t)

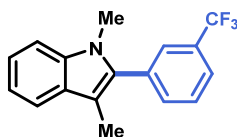

3t, 91% (1h)

Reaction conditions: 1.0 mmol scale, method B, 1 hour reaction time; Purification by flash chromatography on silica (petroleum ether  $R_f = 0.35$ ) afforded 1,3-dimethyl-2-(3-(trifluoromethyl)phenyl)-1H-indole (263 mg, 91%) as an orange oil;  $^1\text{H}$  NMR (400 MHz, Chloroform- $d$ )  $\delta$  7.75 – 7.60 (m, 5H), 7.38 (d,  $J = 8.1$  Hz, 1H), 7.33 (t,  $J = 7.3$  Hz, 1H), 7.22 (t,  $J = 7.4$  Hz, 1H), 3.65 (s, 3H), 2.33 (s, 3H);  $^{13}\text{C}$  NMR (101 MHz, Chloroform- $d$ )  $\delta$  137.6, 136.0, 134.0, 133.2, 131.1 (q,  $J = 32.4$  Hz), 129.0, 128.5, 127.3 (q,  $J = 3.8$  Hz), 124.6 (q,  $J = 3.8$  Hz), 124.2 (q,  $J = 272.4$  Hz), 122.5, 119.5, 119.2, 109.7, 109.5, 31.1, 9.4;  $^{19}\text{F}$  NMR (376 MHz, Chloroform- $d$ )  $\delta$  -62.6; IR (ATR,  $\text{cm}^{-1}$ ): 3057, 2916, 2860, 1614, 1589, 1415, 1361, 1321, 1310, 1231; HRMS (ESI) calculated for  $\text{C}_{17}\text{H}_{15}\text{F}_3\text{N}$   $[\text{M}+\text{H}]^+$ : 290.1151; found: 290.1147.

### 1,3-dimethyl-2-(4-nitrophenyl)-1H-indole (3u)

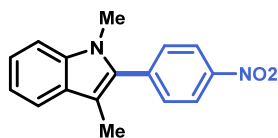

**3u**, 80% (16h)

Reaction conditions: 1.0 mmol scale, method B, 16 hours reaction time; Purification by flash chromatography on silica (2% ethyl acetate in petroleum ether  $R_f = 0.20$ ) afforded 1,3-dimethyl-2-(4-nitrophenyl)-1H-indole (213 mg, 80%) as a orange solid; Mp. 150 °C;  $^1\text{H}$  NMR (400 MHz, Chloroform- $d$ )  $\delta$  8.37 (d,  $J = 8.7$  Hz, 2H), 7.63 (d,  $J = 7.9$  Hz, 1H), 7.58 (d,  $J = 8.7$  Hz, 2H), 7.40 – 7.28 (m, 2H), 7.19 (t,  $J = 6.9$  Hz, 1H), 3.66 (s, 3H), 2.33 (s, 3H);  $^{13}\text{C}$  NMR (101 MHz, Chloroform- $d$ )  $\delta$  147.1, 139.1, 138.2, 135.3, 131.2, 128.5, 123.8, 123.1, 119.9, 119.5, 111.1, 109.7, 31.5, 9.6; IR (ATR,  $\text{cm}^{-1}$ ): 3072, 2932, 1593, 1506, 1468, 1362, 1337, 1236, 1109, 1070; HRMS (ESI) calculated for  $\text{C}_{16}\text{H}_{15}\text{N}_2\text{O}_2$   $[\text{M}+\text{H}]^+$ : 267.1128; found: 267.1124.

### 2-(2-chlorophenyl)-1-methyl-1H-indole (3v)

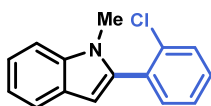

**3v**, 92% (2h)

Reaction conditions: 1.0 mmol scale, method B, 2 hours reaction time; Purification by flash chromatography on silica (1% ethyl acetate in petroleum ether  $R_f = 0.45$ ) afforded 2-(2-chlorophenyl)-1-methyl-1H-indole (235 mg, 92%) as a orange solid; Mp. 75 °C;  $^1\text{H}$  NMR (400 MHz, Chloroform- $d$ )  $\delta$  7.64 (d,  $J = 7.8$  Hz, 1H), 7.56 (d,  $J = 6.9$  Hz, 1H), 7.40 (ddd,  $J = 13.9$ , 6.7, 3.7 Hz, 4H), 7.29 (d,  $J = 7.8$  Hz, 1H), 7.17 (t,  $J = 7.4$  Hz, 1H), 3.53 (s, 3H), 2.20 (s, 3H);  $^{13}\text{C}$  NMR (101 MHz, Chloroform- $d$ )  $\delta$  137.1, 135.8, 134.9, 133.3, 131.6, 130.0, 129.9, 128.2, 126.8, 121.9, 119.1, 109.6, 109.3, 30.6, 9.3; IR (ART,  $\text{cm}^{-1}$ ): 3051, 2913, 1466, 1429, 1381, 1360, 1329, 1244, 1229, 1055; HRMS (ESI) calculated for  $\text{C}_{16}\text{H}_{15}\text{ClN}$   $[\text{M}+\text{H}]^+$ : 256.0888; found: 256.0883.

### 2-(3-iodophenyl)-1-methyl-1H-indole (3w)

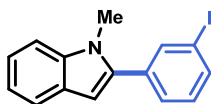

**3w**, 40% (1h)

Reaction conditions: 1.0 mmol scale, method B modified (2 mol%  $\text{Pd}(\text{OAc})_2$ ), 1 hour reaction time; Purification by flash chromatography on silica (2% ethyl acetate in petroleum ether  $R_f = 0.40$ ) afforded 2-(3-iodophenyl)-1-methyl-1H-indole (132 mg, 40%) as a orange solid; Mp. 116 °C;  $^1\text{H}$  NMR (400 MHz, Chloroform- $d$ )  $\delta$  7.90 (t,  $J = 1.58$  Hz, 1H), 7.74 (d,  $J = 7.94$  Hz, 1H), 7.65 (d,  $J = 7.85$  Hz, 1H), 7.48 (d,  $J = 7.73$  Hz, 1H), 7.37 (d,  $J = 8.21$  Hz, 1H), 7.29 (d,  $J = 7.13$  Hz, 1H), 7.19 (dt,  $J = 17.41$ , 7.52 Hz, 2H), 6.58 (s, 1H), 3.75 (s, 3H);  $^{13}\text{C}$  NMR (101 MHz, Chloroform- $d$ )  $\delta$  139.8, 138.6, 138.2, 136.9, 135.1, 130.2, 128.6, 127.9,

122.2, 120.8, 120.2, 109.8, 102.5, 94.4, 31.3; IR (ATR, cm<sup>-1</sup>): 3048, 2928, 1722, 1591, 1557, 1533, 1466, 1429, 1381, 1339; HRMS (ESI) calculated for C<sub>15</sub>H<sub>13</sub>N [M+H]<sup>+</sup>: 334.0087; found: 334.0083.

### 2-(4-bromophenyl)-1,3-dimethyl-1H-indole (3x)<sup>16</sup>

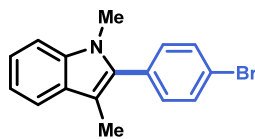

3x, 84% (16h)

Reaction conditions: 1.0 mmol scale, method B modified (2 mol% Pd(OAc)<sub>2</sub>, 1.2 equiv. aryldiazonium salt), 16 hours reaction time; Purification by flash chromatography on silica (petroleum ether R<sub>f</sub> = 0.35) afforded 2-(4-bromophenyl)-1,3-dimethyl-1H-indole (251 mg, 84%) as a orange solid; Mp. 128 °C; <sup>1</sup>H NMR (400 MHz, Chloroform-*d*) δ 7.65 – 7.55 (m, 3H), 7.31 (d, *J* = 8.1 Hz, 1H), 7.29 – 7.21 (m, 3H), 7.14 (t, *J* = 7.4 Hz, 1H), 3.58 (s, 3H), 2.25 (s, 3H); <sup>13</sup>C NMR (101 MHz, Chloroform-*d*) δ 137.5, 136.5, 132.3, 131.7, 131.2, 128.5, 122.2, 122.2, 119.4, 119.0, 109.4, 109.2, 31.1, 9.5; IR (ATR, cm<sup>-1</sup>): 3050, 2916, 2858, 1466, 1354, 1329, 1234, 1072, 1003; HRMS (ESI) calculated for C<sub>16</sub>H<sub>15</sub>BrN [M+H]<sup>+</sup>: 300.0383; found: 300.0379.

### 1-(4-(1-methyl-1H-indol-2-yl)phenyl)ethan-1-one (3ya)<sup>17</sup>

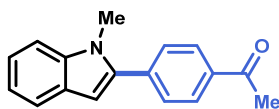

3ya, 58% (1h)

Reaction conditions: 1.0 mmol scale, method B, 1 hour reaction time; Purification by flash chromatography on silica (10% ethyl acetate in petroleum ether R<sub>f</sub> = 0.20) afforded 1-(4-(1-methyl-1H-indol-2-yl)phenyl)ethan-1-one (144 mg, 58%) as a white solid; Mp. 129 °C; <sup>1</sup>H NMR (400 MHz, Chloroform-*d*) δ 8.07 (d, *J* = 8.3 Hz, 2H), 7.65 (dd, *J* = 11.9, 8.1 Hz, 3H), 7.39 (d, *J* = 8.2 Hz, 1H), 7.29 (t, *J* = 7.6 Hz, 1H), 7.17 (t, *J* = 7.4 Hz, 1H), 6.67 (s, 1H), 3.79 (s, 3H), 2.66 (s, 3H); <sup>13</sup>C NMR (101 MHz, Chloroform-*d*) δ 197.7, 140.4, 139.1, 137.6, 136.2, 129.3, 128.7, 128.0, 122.5, 120.9, 120.3, 109.9, 103.2, 31.6, 26.8; IR (ATR, cm<sup>-1</sup>): 3051, 2945, 1676, 1600, 1465, 1408, 1354, 1340, 1263, 1184; HRMS (ESI) calculated for C<sub>17</sub>H<sub>16</sub>NO [M+H]<sup>+</sup>: 250.1227; found: 250.1221.

### 1-(4-(1,3-dimethyl-1H-indol-2-yl)phenyl)ethan-1-one (3y)

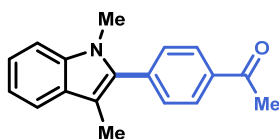

3y, 80% (3h)

Reaction conditions: 1.0 mmol scale, method B, 3 hours reaction time; Purification by flash chromatography on silica (10% ethyl acetate in petroleum ether R<sub>f</sub> = 0.20) afforded 1-(4-(1,3-dimethyl-1H-indol-2-yl)phenyl)ethan-1-one (210 mg, 80%) as a

orange solid; Mp. 132 °C; <sup>1</sup>H NMR (400 MHz, Chloroform-*d*) δ 8.09 (d, *J* = 8.3 Hz, 2H), 7.62 (d, *J* = 7.8 Hz, 1H), 7.52 (d, *J* = 8.3 Hz, 2H), 7.35 (d, *J* = 8.1 Hz, 1H), 7.29 (t, *J* = 7.5 Hz, 1H), 7.18 (t, *J* = 7.4 Hz, 1H), 3.65 (s, 3H), 2.68 (s, 3H), 2.32 (s, 3H); <sup>13</sup>C NMR (101 MHz, Chloroform-*d*) δ 197.8, 137.9, 137.2, 136.5, 136.2, 130.8, 128.5, 128.5, 122.5, 119.6, 119.2, 110.0, 109.5, 31.3, 26.8, 9.6; IR (ATR, cm<sup>-1</sup>): 2980, 2916, 1676, 1606, 1467, 1355, 1329, 1258, 1247, 1238; HRMS (ESI) calculated for C<sub>18</sub>H<sub>18</sub>NO [M+H]<sup>+</sup>: 264.1383; found: 264.1379.

#### 2-(*o*-tolyl)-*1H*-indole (4a)<sup>18</sup>

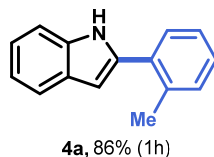

Reaction conditions: 1.0 mmol scale, method B, 1 h reaction time; Purification by flash chromatography on silica (5% ethyl acetate in petroleum ether) afforded 2-(*o*-tolyl)-*1H*-indole (186 mg, 86%) as white solids; Mp. 84 °C<sup>19</sup>; <sup>1</sup>H NMR (400 MHz, Chloroform-*d*) δ 8.15 (s, 1H), 7.67 (d, *J* = 7.8 Hz, 1H), 7.49 (dd, *J* = 5.1, 3.7 Hz, 1H), 7.42 (d, *J* = 8.0 Hz, 1H), 7.36 – 7.28 (m, 3H), 7.22 (t, *J* = 7.5 Hz, 1H), 7.15 (t, *J* = 7.5 Hz, 1H), 6.63 (s, 1H), 2.52 (s, 3H); <sup>13</sup>C NMR (101 MHz, Chloroform-*d*) δ 137.5, 136.3, 136.2, 132.7, 131.2, 129.1, 129.0, 128.1, 126.2, 122.2, 120.6, 120.2, 110.9, 103.1, 21.2; IR (ATR, cm<sup>-1</sup>): 3399, 3049, 1485, 1454, 1344, 1302, 1119, 1057, 799, 745, 719; HRMS (ESI) calculated for C<sub>15</sub>H<sub>14</sub>N [M+H]<sup>+</sup>: 208.1121; found: 208.1119.

#### 2-(2,4-dimethylphenyl)-*1H*-indole (4b)

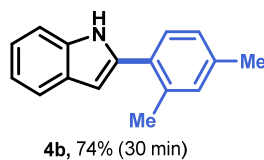

Reaction conditions: 1.0 mmol scale, method B, 30 min reaction time; Purification by flash chromatography on silica (5% ethyl acetate in petroleum ether) afforded 2-(2,4-dimethylphenyl)-*1H*-indole (163 mg, 74%) as white solids; Mp. 130 °C; <sup>1</sup>H NMR (400 MHz, Chloroform-*d*) δ 8.11 (s, 1H), 7.65 (d, *J* = 8.3 Hz, 1H), 7.43 – 7.36 (m, 2H), 7.23 – 7.08 (m, 4H), 6.60 (s, 1H), 2.48 (s, 3H), 2.38 (s, 3H); <sup>13</sup>C NMR (101 MHz, Chloroform-*d*) δ 137.9, 137.7, 136.1, 136.0, 132.0, 129.8, 129.0, 129.0, 126.9, 122.0, 120.5, 120.1, 110.8, 102.8, 21.3, 21.1; IR (ATR, cm<sup>-1</sup>): 3393, 2916, 1485, 1456, 1346, 1302, 1231, 907, 795, 743, 723, 675; HRMS (ESI) calculated for C<sub>16</sub>H<sub>16</sub>N [M+H]<sup>+</sup>: 222.1278; found: 222.1273.

#### 2-mesityl-*1H*-indole (4c –C-2)<sup>20</sup>

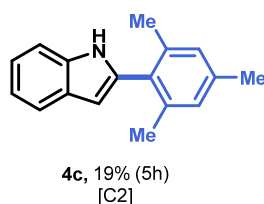

Reaction conditions: 1.0 mmol scale, slightly modified method B (1.2 equiv. aryldiazonium salt at 40 °C), 5 h reaction time; Purification by flash chromatography on silica (5% ethyl acetate in petroleum ether) afforded 2-mesityl-1*H*-indole (45 mg, 19%) as white solids; Mp. 159 °C; <sup>1</sup>H NMR (400 MHz, Chloroform-*d*) δ 7.86 (s, 1H), 7.67 (d, *J* = 7.7 Hz, 1H), 7.40 (d, *J* = 8.0 Hz, 1H), 7.21 (t, *J* = 7.5 Hz, 1H), 7.16 (t, *J* = 7.5 Hz, 1H), 6.99 (s, 2H), 6.40 (s, 1H), 2.37 (s, 3H), 2.17 (s, 6H); <sup>13</sup>C NMR (101 MHz, Chloroform-*d*) δ 138.4, 138.3, 136.4, 136.0, 130.2, 129.0, 128.3, 121.5, 120.4, 119.9, 110.8, 102.7, 21.3, 20.6; IR (ATR, cm<sup>-1</sup>): 3385, 2914, 1456, 1342, 1290, 1034, 851, 783, 756, 702; HRMS (ESI) calculated for C<sub>17</sub>H<sub>18</sub>N [M+H]<sup>+</sup>: 236.1434; found: 236.1431.

### 3-mesityl-1*H*-indole (4c – C-3)<sup>20</sup>

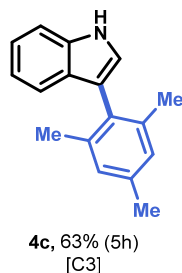

Reaction conditions: 1.0 mmol scale, slightly modified method B (1.2 equiv. aryldiazonium salt at 40 °C), 5 h reaction time; Purification by flash chromatography on silica (5% ethyl acetate in petroleum ether) afforded 3-mesityl-1*H*-indole (148 mg, 63%) as colorless oil; <sup>1</sup>H NMR (399 MHz, Chloroform-*d*) δ 8.18 (s, 1H), 7.44 (d, *J* = 8.1 Hz, 1H), 7.29 – 7.20 (m, 2H), 7.09 (t, *J* = 7.0 Hz, 1H), 7.04 (d, *J* = 2.3 Hz, 1H), 7.00 (s, 2H), 2.37 (s, 3H), 2.07 (s, 6H); <sup>13</sup>C NMR (101 MHz, Chloroform-*d*) δ 138.6, 136.7, 136.2, 131.0, 128.1, 127.5, 122.6, 122.1, 120.1, 119.7, 116.0, 111.2, 21.2, 20.9; IR (ATR, cm<sup>-1</sup>): 3410, 2916, 1558, 1454, 1341, 1250, 1236, 1092, 853, 743; HRMS (ESI) calculated for C<sub>17</sub>H<sub>18</sub>N [M+H]<sup>+</sup>: 236.1434; found: 236.1431.

### 2-(4-methoxy-2-methylphenyl)-1*H*-indole (4d)<sup>21</sup>

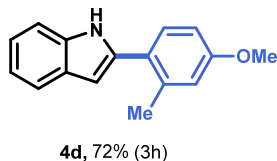

Reaction conditions: 1.0 mmol scale, slightly modified method B (1.2 equiv. aryldiazonium salt at 40 °C), 3 h reaction time; Purification by flash chromatography on silica (10% ethyl acetate in petroleum ether) afforded 2-(4-methoxy-2-methylphenyl)-1*H*-indole (170 mg, 72%) as white solids; Mp. 132 °C; <sup>1</sup>H NMR (400 MHz, Chloroform-*d*) δ 8.08 (s, 1H), 7.64 (d, *J* = 8.2 Hz, 1H), 7.40 (d, *J* = 8.5 Hz, 2H), 7.20 (td, *J* = 7.5, 1.3 Hz, 1H), 7.14 (td, *J* = 7.3, 1.1 Hz, 1H), 6.89 – 6.81 (m, 2H), 6.55 (dd, *J* = 2.1, 0.9 Hz, 1H), 3.85 (s, 3H), 2.48 (s, 3H); <sup>13</sup>C NMR (101 MHz, Chloroform-*d*) δ 159.3, 137.9, 137.5, 136.1, 130.3, 129.0, 125.5, 121.8, 120.4, 120.1, 116.5, 111.5, 110.8, 102.4, 55.4, 21.4; IR (ATR, cm<sup>-1</sup>): 3397, 1605, 1570, 1493, 1454, 1346, 1296, 1246, 1229, 1161; HRMS (ESI) calculated for C<sub>16</sub>H<sub>16</sub>NO [M+H]<sup>+</sup>: 238.1227; found: 238.1226.

### 2-(4-methoxyphenyl)-3-methyl-1*H*-indole (4e)<sup>22</sup>

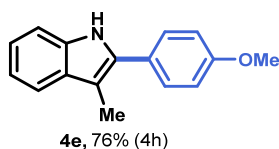

Reaction conditions: 1.0 mmol scale, method B, 4 h reaction time; Purification by flash chromatography on silica (5% ethyl acetate in petroleum ether) afforded 2-(4-methoxyphenyl)-3-methyl-1*H*-indole (180 mg, 76%) as off-white solids; Mp. 126 °C; <sup>1</sup>H NMR (399 MHz, Chloroform-*d*) δ 7.95 (s, 1H), 7.60 (d, *J* = 7.7 Hz, 1H), 7.55 – 7.48 (m, 2H), 7.35 (d, *J* = 7.7 Hz, 1H), 7.24 – 7.12 (m, 2H), 7.06 – 6.98 (m, 2H), 3.88 (s, 3H), 2.45 (s, 3H); <sup>13</sup>C NMR (100 MHz, Chloroform-*d*) δ 159.1, 135.8, 134.1, 130.2, 129.1, 126.0, 122.1, 119.6, 118.9, 114.4, 110.7, 107.9, 55.5, 9.7; IR (ATR, cm<sup>-1</sup>): 3412, 3051, 2914, 2860, 2835, 1609, 1508, 1244, 1036, 744; HRMS (ESI) calculated for C<sub>16</sub>H<sub>16</sub>NO [M+H]<sup>+</sup>: 238.1227; found: 238.1229.

### 6-fluoro-1-methyl-2-phenyl-indole (**5a**)<sup>23</sup>

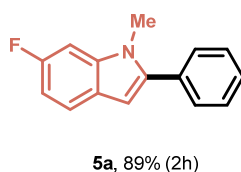

Reaction conditions: 1.0 mmol scale, method A, 2 h reaction time; Purification by flash chromatography on silica (2% ethyl acetate in petroleum ether) afforded 6-fluoro-1-methyl-2-phenyl-indole (200 mg, 89%) as white solids; Mp. 159 °C; <sup>1</sup>H NMR (400 MHz, Chloroform-*d*) δ 7.57 (dd, *J* = 8.6, 5.4 Hz, 1H), 7.55 – 7.47 (m, 3H), 7.45 (d, *J* = 6.8 Hz, 1H), 7.07 (dd, *J* = 9.9, 2.2 Hz, 1H), 6.95 (ddd, *J* = 9.7, 8.6, 2.3 Hz, 1H), 6.57 (s, 1H), 3.72 (s, 3H); <sup>13</sup>C NMR (101 MHz, Chloroform-*d*) δ 159.9 (d, *J* = 237.6 Hz), 142.2 (d, *J* = 4.0 Hz), 138.56 (d, *J* = 12.1 Hz), 132.7, 129.4, 128.7, 128.1, 124.5, 121.3 (d, *J* = 10.1 Hz), 108.6 (d, *J* = 24.4 Hz), 101.7, 96.2 (d, *J* = 26.1 Hz), 31.5; <sup>19</sup>F NMR (376 MHz, Chloroform-*d*) δ -120.6 (td, *J* = 9.5, 5.4 Hz); IR (ATR, cm<sup>-1</sup>): 1624, 1489, 1464, 1354, 1186, 1159, 1082, 957, 827, 766, 702; HRMS (ESI) calculated for C<sub>15</sub>H<sub>13</sub>FN [M+H]<sup>+</sup>: 226.1027; found: 226.1029.

### 6-fluoro-2-(4-fluorophenyl)-1-methyl-1*H*-indole (**5b**)

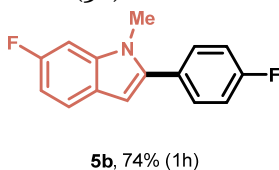

Reaction conditions: 1.0 mmol scale, method A, 1 h reaction time; Purification by flash chromatography on silica (petroleum ether R<sub>f</sub> = 0.35) afforded 6-fluoro-2-(4-fluorophenyl)-1-methyl-1*H*-indole (180 mg, 74%) as white solids; Mp. 124 °C; <sup>1</sup>H NMR (399 MHz, Chloroform-*d*) δ 7.53 (dd, *J* = 8.6, 5.4 Hz, 1H), 7.48 – 7.42 (m, 2H), 7.22 – 7.12 (m, 2H), 7.03 (dd, *J* = 9.9, 2.2 Hz, 1H), 6.91 (ddd, *J* = 9.6, 8.6, 2.3 Hz, 1H), 6.50 (s, 1H), 3.67 (s, 3H); <sup>13</sup>C NMR (101 MHz, Chloroform-*d*) δ 164.0, 161.6, 161.2, 158.8, 141.1 (d, *J* = 3.7 Hz), 138.5 (d, *J* = 11.9 Hz), 131.1 (d, *J* = 8.1 Hz), 128.8 (d, *J* = 3.5 Hz), 124.4, 121.3 (d, *J* = 10.0 Hz), 115.8 (d, *J* = 21.6 Hz), 108.7 (d, *J* = 24.4 Hz), 101.8, 96.2 (d, *J* = 26.2 Hz), 31.4; <sup>19</sup>F NMR (376 MHz, Chloroform-*d*) δ -113.65 (ddd, *J* = 14.0,

8.5, 5.3 Hz), -120.39 (td,  $J = 10.0, 5.4$  Hz); IR (ATR,  $\text{cm}^{-1}$ ): 3065, 2955, 2920, 1620, 1583, 1549, 1495, 1466, 1427, 1358; HRMS (ESI) calculated for  $\text{C}_{15}\text{H}_{12}\text{F}_2\text{N}$   $[\text{M}+\text{H}]^+$ : 244.0933; found: 244.0928.

#### 5-methoxy-1-methyl-2-phenyl-indole (5c)<sup>24</sup>

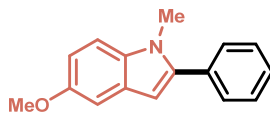

5c, 62% (2h)

Reaction conditions: 1.0 mmol scale, method A, 2h reaction time; Purification by flash chromatography on silica (2% ethyl acetate in petroleum ether) afforded 5-methoxy-1-methyl-2-phenyl-indole (146 mg, 62%) as white solids; Mp. 127 °C;  $^1\text{H}$  NMR (400 MHz, Chloroform- $d$ )  $\delta$  7.55 – 7.46 (m, 4H), 7.45 – 7.39 (m, 1H), 7.28 (d,  $J = 8.8$  Hz, 1H), 7.14 (d,  $J = 2.4$  Hz, 1H), 6.95 (dd,  $J = 8.8, 2.5$  Hz, 1H), 6.53 (s, 1H), 3.90 (s, 3H), 3.74 (s, 3H);  $^{13}\text{C}$  NMR (101 MHz, Chloroform- $d$ )  $\delta$  154.5, 142.3, 133.9, 133.0, 129.4, 128.6, 128.4, 127.9, 112.0, 110.5, 102.3, 101.4, 56.1, 31.4; IR (ATR,  $\text{cm}^{-1}$ ): 1734, 1474, 1348, 1219, 1180, 1136, 1030, 843, 800, 766, 704; HRMS (ESI) calculated for  $\text{C}_{17}\text{H}_{18}\text{FN}$   $[\text{M}+\text{H}]^+$ : 236.1434; found: 236.1432.

#### methyl 1-methyl-2-phenyl-1H-indole-6-carboxylate (5d)<sup>25</sup>

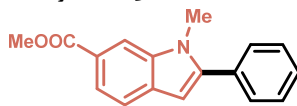

5d, 22% (16h)

Reaction conditions: 1.0 mmol scale, method B modified (1.2 equiv. aryldiazonium salt at 40 °C), 16h reaction time; Purification by flash chromatography on silica (10% ethyl acetate in petroleum ether  $R_f = 0.30$ ) afforded methyl 1-methyl-2-phenyl-1H-indole-6-carboxylate (59 mg, 22%) as orange solids; Mp. 100 °C;  $^1\text{H}$  NMR (400 MHz, Chloroform- $d$ )  $\delta$  8.15 (s, 1H), 7.85 (d,  $J = 8.3$  Hz, 1H), 7.64 (d,  $J = 8.3$  Hz, 1H), 7.56 – 7.41 (m, 5H), 6.60 (s, 1H), 3.97 (s, 3H), 3.82 (s, 3H);  $^{13}\text{C}$  NMR (101 MHz, Chloroform- $d$ )  $\delta$  168.4, 145.0, 137.8, 132.3, 131.8, 129.5, 128.8, 128.6, 123.2, 121.1, 120.1, 112.2, 102.2, 52.1, 31.5; IR (ATR,  $\text{cm}^{-1}$ ): 3073, 2949, 1705, 1609, 1464, 1435, 1337, 1302, 1250, 1227; HRMS (ESI) calculated for  $\text{C}_{17}\text{H}_{16}\text{NO}_2$   $[\text{M}+\text{H}]^+$ : 266.1176; found: 266.1173.

#### 1,2-dimethyl-3-(phenyldiazenyl)-indole (1bb)

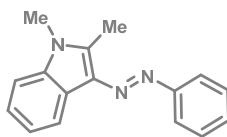

1bb, 93% (5h)

Reaction conditions: 1.0 mmol scale, method A, 5h reaction time; Purification by flash chromatography on silica (15% ethyl acetate in petroleum ether) afforded methyl 1,2-dimethyl-3-(phenyldiazenyl)-indole (231 mg, 93%) as a brown solid;

Mp. 125 °C; <sup>1</sup>H NMR (399 MHz, DMSO-d<sub>6</sub>) δ 8.45 – 8.38 (m, 1H), 7.85 – 7.78 (m, 2H), 7.59 – 7.46 (m, 3H), 7.36 (t, J = 7.2 Hz, 1H), 7.26 (p, J = 7.2 Hz, 2H), 3.79 (s, 3H), 2.80 (s, 3H); <sup>13</sup>C NMR (100 MHz, DMSO-d<sub>6</sub>) δ 153.5, 146.6, 136.8, 131.4, 129.1, 128.3, 123.2, 122.7, 121.6, 121.1, 118.2, 110.0, 30.0, 9.9; IR (ATR, cm<sup>-1</sup>): 3055, 2924, 1534, 1446, 1387, 1059; HRMS (ESI) calculated for C<sub>16</sub>H<sub>16</sub>N<sub>3</sub> [M+H]<sup>+</sup>: 250.1339; found: 250.1340.

### 2-phenylbenzofuran (6a)<sup>26</sup>

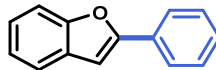

6a, 70% (6h)

Reaction conditions: 1.0 mmol scale, method C, 6 h reaction time; Purification by flash chromatography on silica (petroleum ether) afforded ethyl 2-phenylbenzofuran (136 mg, 70%) as white solids; Mp. 120 °C; <sup>1</sup>H NMR (400 MHz, Chloroform-d) δ 7.88 (d, J = 7.5 Hz, 2H), 7.60 (d, J = 7.5 Hz, 1H), 7.54 (d, J = 7.5 Hz, 1H), 7.46 (t, J = 7.5 Hz, 2H), 7.36 (t, J = 7.5 Hz, 1H), 7.33 – 7.21 (m, 2H), 7.04 (s, 1H); <sup>13</sup>C NMR (101 MHz, Chloroform-d) δ 156.1, 155.1, 130.7, 129.4, 129.0, 128.7, 125.1, 124.4, 123.1, 121.1, 111.4, 101.5; IR (ATR, cm<sup>-1</sup>): 3051, 3034, 2922, 2853, 1562, 1483, 1470, 1454, 1441, 1350, 1306; HRMS (ESI) calculated for C<sub>14</sub>H<sub>11</sub>O [M+H]<sup>+</sup>: 195.0805; found: 195.0803.

### 2-(3-chloro-4-methoxyphenyl)benzofuran (6b)

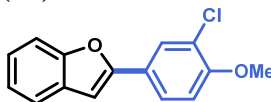

6b, 66% (16h)

Reaction conditions: 1.0 mmol scale, method C, 16 h reaction time; Purification by flash chromatography on silica (5% ethyl acetate in petroleum ether) afforded ethyl 2-(3-chloro-4-methoxyphenyl)benzofuran (171 mg, 66%) as white solids; Mp. 150 °C; <sup>1</sup>H NMR (399 MHz, Chloroform-d) δ 7.88 (d, J = 2.1 Hz, 1H), 7.72 (dd, J = 8.6, 2.1 Hz, 1H), 7.58 – 7.55 (m, 1H), 7.51 (d, J = 8.1 Hz, 1H), 7.32 – 7.18 (m, 2H), 6.99 (d, J = 8.6 Hz, 1H), 6.91 (s, 1H), 3.96 (s, 3H); <sup>13</sup>C NMR (100 MHz, Chloroform-d) δ 155.37, 154.95, 154.74, 129.40, 127.06, 124.63, 124.38, 124.36, 123.21, 123.18, 120.97, 112.37, 111.26, 100.81, 56.46; IR (ATR, cm<sup>-1</sup>): 3005, 2941, 2845, 1605, 1495, 1450, 1439, 1263, 1061, 804; HRMS (ESI) calculated for C<sub>15</sub>H<sub>12</sub>ClO<sub>2</sub> [M+H]<sup>+</sup>: 259.0520; found: 259.0514.

### 2-(4-fluorophenyl)benzofuran (6c)<sup>26</sup>

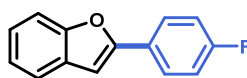

6c, 71% (4h)



Reaction conditions: 1.0 mmol scale, method C, 4 h reaction time; Purification by flash chromatography on silica (petroleum ether) afforded 2-(4-fluorophenyl)benzofuran (151 mg, 71%) as white solids; Mp. 120 °C; <sup>1</sup>H NMR (400 MHz, Chloroform-d) δ 7.88 – 7.81 (m, 2H), 7.62 – 7.56 (m, 1H), 7.56 – 7.49 (m, 1H), 7.32 – 7.21 (m, 2H), 7.19 – 7.10 (m, 2H), 6.97 – 6.95 (m, 1H); <sup>13</sup>C NMR (100 MHz, Chloroform-d) δ 163.1 (d, *J* = 247.7 Hz), 155.2, 155.0, 129.4, 127.0, 126.9, 124.5, 123.2, 121.1, 116.1 (d, *J* = 21.8 Hz), 111.3, 101.2 (d, *J* = 1.4 Hz); <sup>19</sup>F NMR (376 MHz, Chloroform-d) δ -112.4 (m); IR (ATR, cm<sup>-1</sup>): 3046, 1599, 1499, 1450, 1223, 1206, 1157, 1098, 839, 800; HRMS (ESI) calculated for C<sub>14</sub>H<sub>10</sub>FO [M+H]<sup>+</sup>: 213.0710; found: 213.0717.

### 2-(4'-(trifluoromethyl)phenyl)benzofuran (6d)<sup>27</sup>

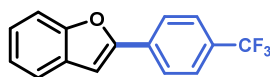

6d, 82% (16h)

Reaction conditions: 1.0 mmol scale, method C, 16 h reaction time; Purification by flash chromatography on silica (petroleum ether) afforded 2-(4'-(trifluoromethyl)phenyl)benzofuran (215 mg, 82%) as white solids; Mp. 164 °C; <sup>1</sup>H NMR (500 MHz, Chloroform-d) δ 7.95 (d, *J* = 7.8 Hz, 2H), 7.69 (d, *J* = 7.8 Hz, 2H), 7.61 (ddd, *J* = 7.8, 1.4, 0.7 Hz, 1H), 7.54 (ddd, *J* = 7.8, 1.4, 0.7 Hz, 1H), 7.33 (ddd, *J* = 8.0, 7.5, 1.3 Hz, 1H), 7.30 – 7.21 (m, 1H), 7.12 (d, *J* = 0.7 Hz, 1H); <sup>13</sup>C NMR (101 MHz, Chloroform-d) δ 155.3, 154.4, 133.9, 130.3 (q, *J* = 31.3 Hz), 129.0, 126.0 (q, *J* = 3.8 Hz), 125.3, 125.2, 124.2 (q, *J* = 271.9 Hz), 123.5, 121.5, 111.6, 103.4; <sup>19</sup>F NMR (282 MHz, Chloroform-d) δ -62.6; IR (ATR, cm<sup>-1</sup>): 1738, 1373, 1323, 1229, 1163, 1107, 1069, 1013, 841, 810, 748.

### 2-(3-(trifluoromethyl)phenyl)benzofuran (6e)<sup>28</sup>

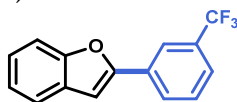

6e, 81% (30 min)

Reaction conditions: 1.0 mmol scale, method C, 30 min reaction time; Purification by flash chromatography on silica (petroleum ether) afforded 2-(3-(trifluoromethyl)phenyl)benzofuran (212 mg, 81%) as off-white solids; Mp. 67 °C; <sup>1</sup>H NMR (400 MHz, Chloroform-d) δ 8.12 (s, 1H), 8.03 (d, *J* = 7.5 Hz, 1H), 7.64 – 7.53 (m, 4H), 7.33 (ddd, *J* = 8.4, 7.3, 1.3 Hz, 1H), 7.26 (ddd, *J* = 7.7, 1.1 Hz, 1H), 7.13 (d, *J* = 0.8 Hz, 1H); <sup>13</sup>C NMR (100 MHz, Chloroform-d) δ 155.1, 154.3, 131.5 (q, *J* = 32 Hz), 131.4, 129.5, 129.0, 128.0, 125.1, 125.1 (q, *J* = 4 Hz), 123.4, 122.8 (q, *J* = 272 Hz), 121.77 (q, *J* = 4 Hz), 121.4, 111.5, 102.8; <sup>19</sup>F NMR (376 MHz, Chloroform-d) δ -62.88; IR (ATR, cm<sup>-1</sup>): 3109, 3036, 2928, 1726, 1616, 1601, 1450, 1329, 1273, 1107.

### 2-(4-(trifluoromethoxyphenyl) benzofuran (6f)<sup>29</sup>

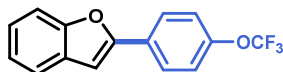

**6f**, 60% (2h)

Reaction conditions: 1.0 mmol scale, method C, 2 h reaction time; Purification by flash chromatography on silica (petroleum ether) afforded 2-(4-(trifluoromethoxyphenyl) benzofuran (167 mg, 60%) as white solids; Mp. 120 °C; <sup>1</sup>H NMR (500 MHz, Chloroform-d) δ 7.93 – 7.89 (m, 2H), 7.63 (ddd, *J* = 7.6, 1.4, 0.6 Hz, 1H), 7.58 – 7.55 (m, 1H), 7.39 – 7.24 (m, 4H), 7.05 (d, *J* = 0.9 Hz, 1H); <sup>13</sup>C NMR (101 MHz, Chloroform-d) δ 155.2, 154.7, 149.4, 129.4, 129.2, 126.5, 124.8, 123.3, 121.9, 121.5, 121.3, 119.4, 111.4, 102.1; <sup>19</sup>F NMR (376 MHz, Chloroform-d) δ -57.8; IR (ATR, cm<sup>-1</sup>): 3049, 2930, 1570, 1499, 1450, 1300, 1206, 1153, 804, 752.

### 2-(2,3-dichlorophenyl)benzofuran (6g)

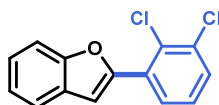

**6g**, 68% (3h)

Reaction conditions: 1.0 mmol scale, method C, 3 h reaction time; Purification by flash chromatography on silica (petroleum ether) afforded 2-(2,3-dichlorophenyl)benzofuran (178 mg, 68%) as white solids; Mp. 71 °C; <sup>1</sup>H NMR (399 MHz, Chloroform-d) δ 7.97 (dd, *J* = 7.9, 1.5 Hz, 1H), 7.68 – 7.63 (m, 1H), 7.57 – 7.52 (m, 2H), 7.48 (dd, *J* = 7.9, 1.5 Hz, 1H), 7.40 – 7.23 (m, 3H); <sup>13</sup>C NMR (100 MHz, Chloroform-d) δ 154.4, 151.6, 134.6, 131.4, 130.1, 129.8, 129.0, 127.5, 125.5, 123.3, 121.8, 111.3, 108.4; IR (ATR, cm<sup>-1</sup>): 3063, 3040, 1582, 1549, 1439, 1414, 1344, 1184, 1032, 781.

### 2-(3,5-dichlorophenyl)benzofuran (6h)<sup>30</sup>

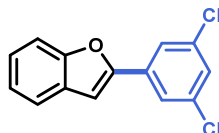

**6h**, 92% (1h)

Reaction conditions: 1.0 mmol scale, method C, 1 h reaction time; Purification by flash chromatography on silica (petroleum ether) afforded 2-(3,5-dichlorophenyl)benzofuran (242 mg, 92%) as bright yellow solids; Mp. 103 °C; <sup>1</sup>H NMR (400 MHz, Chloroform-d) δ 7.73 (d, *J* = 1.9 Hz, 2H), 7.63 – 7.59 (m, 1H), 7.55 – 7.50 (m, 1H), 7.37 – 7.30 (m, 2H), 7.30 – 7.23 (m, 1H), 7.07 (d, *J* = 0.8 Hz, 1H); <sup>13</sup>C NMR (100 MHz, Chloroform-d) δ 155.2, 153.1, 135.7, 133.4, 128.8, 128.4, 125.5, 123.5, 123.3, 121.6, 111.6, 103.6; IR (ATR, cm<sup>-1</sup>): 3069, 2922, 1599, 1578, 1552, 1454, 1412, 1260, 1121, 795.

### 3-(3-(trifluoromethyl)phenyl)benzo[*b*]thiophene (7a)<sup>31</sup>

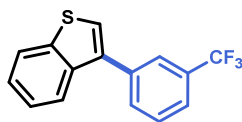

**7a**, 80%<sup>b</sup> (16h)  
[C2:C3 4:96]

Reaction conditions: 1.0 mmol scale, method D, 16 h reaction time; Purification by flash chromatography on silica (petroleum ether) afforded 3-(3-(trifluoromethyl)phenyl)benzo[b]thiophene (222 mg, 80% [C-2:C-3 4:96]) as a colorless oil; <sup>1</sup>H NMR (399 MHz, Chloroform-d)  $\delta$  7.97 – 7.93 (m, 1H), 7.90 – 7.85 (m, 2H), 7.78 (d,  $J$  = 7.7 Hz, 1H), 7.69 (d,  $J$  = 7.7 Hz, 1H), 7.62 (t,  $J$  = 7.7 Hz, 1H), 7.48 (s, 1H), 7.46 – 7.42 (m, 2H); <sup>13</sup>C NMR (100 MHz, Chloroform-d)  $\delta$  140.9, 137.6, 136.9, 136.7, 132.1, 131.4 (q,  $J$  = 32.0 Hz), 129.4, 125.6 (q,  $J$  = 4.0 Hz), 124.9, 124.8, 124.7, 124.4 (q,  $J$  = 4.0 Hz), 124.3 (q,  $J$  = 273.0 Hz), 123.2, 122.6; <sup>19</sup>F NMR (376 MHz, Chloroform-d)  $\delta$  -62.6 (s); IR (ATR, cm<sup>-1</sup>): 3061, 2930, 1431, 1319, 1312, 1163, 1119, 1094, 1072, 758.

### 3-(4-(trifluoromethoxy)phenyl)benzo[b]thiophene (7b)

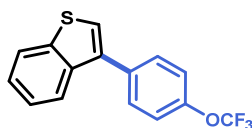

**7b**, 73%<sup>b</sup>  
(16h)  
[C2:C3 2:98]

Reaction conditions: 1.0 mmol scale, method D, 16 h reaction time; Purification by flash chromatography on silica (petroleum ether) afforded 3-(4-(trifluoromethoxy)phenyl)benzo[b]thiophene (215 mg, 73%, [C-2:C-3 2:98]) as a yellow oil; <sup>1</sup>H NMR (399 MHz, Chloroform-d)  $\delta$  7.98 – 7.92 (m, 1H), 7.91 – 7.86 (m, 1H), 7.62 (d,  $J$  = 8.6 Hz, 2H), 7.49 – 7.40 (m, 3H), 7.36 (d,  $J$  = 8.6 Hz, 2H); <sup>13</sup>C NMR (100 MHz, Chloroform-d)  $\delta$  148.8, 140.9, 137.8, 136.8, 134.9, 130.2, 124.8, 124.7, 124.2, 123.2, 122.8, 121.4, 120.7 (q,  $J$  = 257.2 Hz); <sup>19</sup>F NMR (376 MHz, Chloroform-d)  $\delta$  -57.8; IR (ATR, cm<sup>-1</sup>): 3061, 2930, 1431, 11319, 1312, 1163, 1119, 1094, 1072, 758.

### methyl 2-(5-methylbenzofuran-2-yl)benzoate (8a)<sup>32</sup>

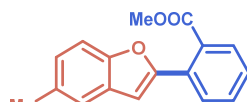

**8a**, 70% (2h)

Reaction conditions: 1.0 mmol scale, slightly modified method C (1.0 mol% Pd at 40 °C, no reflux work up), 2h reaction time; Purification by flash chromatography on silica (5% ethyl acetate in petroleum ether) afforded methyl 2-(5-methylbenzofuran-2-yl)benzoate (186 mg, 70%) as a yellow oil; <sup>1</sup>H NMR (399 MHz, Chloroform-d)  $\delta$  7.78 – 7.69 (m, 2H), 7.55 (td,  $J$  = 7.6, 1.3 Hz, 1H), 7.44 (td,  $J$  = 7.6, 1.3 Hz, 1H), 7.41 – 7.36 (m, 2H), 7.12 (dd,  $J$  = 8.4, 1.4 Hz, 1H), 6.87 (s, 1H), 3.82 (s, 3H), 2.46 (s, 3H); <sup>13</sup>C NMR (100 MHz, Chloroform-d)  $\delta$  169.6, 154.8, 153.7, 132.5, 131.1, 131.0, 129.8, 129.4, 129.1, 129.0, 128.6,

126.0, 121.1, 110.7, 104.3, 52.6, 21.5; IR (ATR, cm<sup>-1</sup>): 2949, 2920, 1726, 1449, 1289, 1265, 1123, 1090, 918, 754; HRMS (ESI) calculated for C<sub>17</sub>H<sub>15</sub>O<sub>3</sub> [M+H]<sup>+</sup>: 267.1016; found: 267.1016.

## 8. References

- (1) Kalyani, D.; McMurtrey, K. B.; Neufeldt, S. R.; Sanford, M. S. *J. Am. Chem. Soc.* **2011**, *133*, 18566.
- (2) Baxter, R. D.; Sale, D.; Engle, K. M.; Yu, J. Q.; Blackmond, D. G. *J. Am. Chem. Soc.* **2012**, *134*, 4600.
- (3) Frisch, M. J. *et al.*; Gaussian 09, Revision D.01, Gaussian, Inc.: Wallingford CT, 2009.
- (4) Erb, W.; Hellal, A.; Albini, M.; Rouden, J.; Blanchet, J. *Chem. - Eur. J.* **2014**, *20*, 6608.
- (5) Sun, N.; Huang, P.; Wang, Y.; Mo, W.; Hu, B.; Shen, Z.; Hu, X. *Tetrahedron* **2015**, *71*, 4835.
- (6) Cody, W. L.; Holsworth, D. D.; Powell, N. A.; Jalaie, M.; Zhang, E.; Wang, W.; Samas, B.; Bryant, J.; Ostroski, R.; Ryan, M. J.; Edmunds, J. J. *Bioorg. Med. Chem.* **2005**, *13*, 59.
- (7) Deprez, N. R.; Kalyani, D.; Krause, A.; Sanford, M. S. *J. Am. Chem. Soc.* **2006**, *128*, 4972.
- (8) Chen, Y.-y.; Chen, J.-h.; Zhang, N.-n.; Ye, L.-m.; Zhang, X.-j.; Yan, M. *Tetrahedron Lett.* **2015**, *56*, 478.
- (9) So, C. M.; Chow, W. K.; Choy, P. Y.; Lau, C. P.; Kwong, F. Y. *Chem. - Eur. J.* **2010**, *16*, 7996.
- (10) Zou, Y.; Yue, G.; Xu, J.; Zhou, J. *Eur. J. Org. Chem.* **2014**, *2014*, 5901.
- (11) Zhang, L.; Li, P.; Liu, C.; Yang, J.; Wang, M.; Wang, L. *Cat. Sci. Technol.* **2014**, *4*, 1979.
- (12) Shi, Z.; Ding, S.; Cui, Y.; Jiao, N. *Angew. Chem. Int. Ed.* **2009**, *48*, 7895.
- (13) Huang, Y.; Lin, Z.; Cao, R. *Chem. - Eur. J.* **2011**, *17*, 12706.
- (14) Nandi, D.; Jhou, Y.-M.; Lee, J.-Y.; Kuo, B.-C.; Liu, C.-Y.; Huang, P.-W.; Lee, H. M. *J. Org. Chem.* **2012**, *77*, 9384.
- (15) Lebrasseur, N.; Larrosa, I. *J. Am. Chem. Soc.* **2008**, *130*, 2926.
- (16) Wei, W.-t.; Dong, X.-j.; Nie, S.-z.; Chen, Y.-y.; Zhang, X.-j.; Yan, M. *Org. Lett.* **2013**, *15*, 6018.
- (17) Yanagisawa, S.; Sudo, T.; Noyori, R.; Itami, K. *J. Am. Chem. Soc.* **2006**, *128*, 11748.
- (18) Fang, Y.-Q.; Lautens, M. *J. Org. Chem.* **2008**, *73*, 538.
- (19) Jadhav, J.; Gaikwad, V.; Kurane, R.; Salunkhe, R.; Rashinkar, G. *Synlett* **2012**, DOI: 10.1055/s-0032-1317320, 2511.
- (20) Alsabeh, P. G.; Lundgren, R. J.; Longobardi, L. E.; Stradiotto, M. *Chem. Commun.* **2011**, *47*, 6936.
- (21) Fang, Y.-Q.; Lautens, M. *The Journal of Organic Chemistry* **2008**, *73*, 538.
- (22) Nguyen, Q.; Nguyen, T.; Driver, T. G. *J. Am. Chem. Soc.* **2013**, *135*, 620.
- (23) Lavery, C. B.; McDonald, R.; Stradiotto, M. *Chem. Commun.* **2012**, *48*, 7277.
- (24) Liang, Z.; Yao, B.; Zhang, Y. *Org. Lett.* **2010**, *12*, 3185.
- (25) Lane, B. S.; Brown, M. A.; Sames, D. *J. Am. Chem. Soc.* **2005**, *127*, 8050.
- (26) Gao, H.; Xu, Q. L.; Keene, C.; Kurti, L. *Chem. - Eur. J.* **2014**, *20*, 8883.
- (27) Denmark, S. E.; Smith, R. C.; Chang, W.-T. T.; Muhuhi, J. M. *J. Am. Chem. Soc.* **2009**, *131*, 3104.
- (28) Fürstner, A.; Davies, P. W. *J. Am. Chem. Soc.* **2005**, *127*, 15024.
- (29) Moure, M. J.; SanMartin, R.; Dominguez, E. *Adv. Synth. Catal.* **2014**, *356*, 2070.
- (30) Loukotova, L.; Yuan, K. D.; Doucet, H. *ChemCatChem* **2014**, *6*, 1303.
- (31) Tang, D. T.; Collins, K. D.; Glorius, F. *J. Am. Chem. Soc.* **2013**, *135*, 7450.
- (32) Judd, D. B.; Dowle, M. D.; Middlemiss, D.; Scopes, D. I. C.; Ross, B. C.; Jack, T. I.; Pass, M.; Tranquillini, E.; Hobson, J. E. *J. Med. Chem.* **1994**, *37*, 3108.

## 9. DFT calculations: XYZ and thermal Data

*Int1*

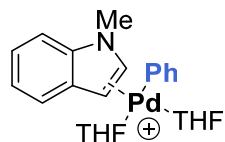

|    |                 |                 |                 |
|----|-----------------|-----------------|-----------------|
| Pd | 0.401845000000  | -0.081752000000 | -0.049681000000 |
| C  | -2.123926000000 | -1.541797000000 | -0.795201000000 |
| C  | -2.772787000000 | -1.392679000000 | 0.443846000000  |
| C  | -4.104267000000 | -0.994782000000 | 0.548681000000  |
| C  | -4.789415000000 | -0.773771000000 | -0.638393000000 |
| C  | -4.166985000000 | -0.941578000000 | -1.886867000000 |
| C  | -2.835989000000 | -1.324123000000 | -1.976954000000 |
| C  | -0.738307000000 | -1.888858000000 | -0.509997000000 |
| C  | -0.661362000000 | -1.984974000000 | 0.898164000000  |
| H  | -4.593227000000 | -0.874374000000 | 1.510169000000  |
| H  | -5.833290000000 | -0.478913000000 | -0.600910000000 |
| H  | -4.740189000000 | -0.774509000000 | -2.792808000000 |
| H  | -2.357184000000 | -1.451088000000 | -2.943301000000 |
| H  | 0.128938000000  | -2.416673000000 | 1.498773000000  |
| N  | -1.862427000000 | -1.684302000000 | 1.455929000000  |
| C  | -2.145914000000 | -1.612773000000 | 2.875268000000  |
| H  | -2.306117000000 | -0.577043000000 | 3.191376000000  |
| H  | -3.038100000000 | -2.201043000000 | 3.104931000000  |
| H  | -1.301056000000 | -2.025880000000 | 3.428151000000  |
| H  | -0.084240000000 | -2.432503000000 | -1.181633000000 |
| O  | -1.349534000000 | 1.273550000000  | 0.025559000000  |
| C  | -2.968898000000 | 2.779973000000  | -0.735440000000 |
| C  | -2.595566000000 | 3.160214000000  | 0.701599000000  |
| C  | -1.754608000000 | 1.973567000000  | -1.165841000000 |
| C  | -1.896267000000 | 1.898079000000  | 1.199717000000  |
| H  | -3.143872000000 | 3.646518000000  | -1.376467000000 |
| H  | -1.967216000000 | 1.222863000000  | -1.928995000000 |
| H  | -3.459275000000 | 3.422269000000  | 1.316420000000  |
| H  | -2.604978000000 | 1.193761000000  | 1.649209000000  |
| H  | -1.903025000000 | 4.008276000000  | 0.703501000000  |
| H  | -1.081285000000 | 2.093737000000  | 1.902509000000  |
| H  | -0.927014000000 | 2.614865000000  | -1.493463000000 |
| H  | -3.860801000000 | 2.144835000000  | -0.749814000000 |
| O  | 1.612549000000  | 1.728165000000  | 0.005945000000  |
| C  | 3.586750000000  | 2.765574000000  | 0.816409000000  |
| C  | 3.860628000000  | 2.142165000000  | -0.555666000000 |
| C  | 2.303190000000  | 2.059893000000  | 1.240011000000  |
| C  | 2.459525000000  | 2.043958000000  | -1.131073000000 |
| H  | 3.425917000000  | 3.844180000000  | 0.722074000000  |
| H  | 2.518386000000  | 1.126857000000  | 1.767438000000  |
| H  | 4.293819000000  | 1.141307000000  | -0.450118000000 |
| H  | 2.339649000000  | 1.254487000000  | -1.873439000000 |
| H  | 4.521543000000  | 2.749534000000  | -1.177806000000 |
| H  | 2.112128000000  | 2.996400000000  | -1.546120000000 |
| H  | 1.629317000000  | 2.676832000000  | 1.838922000000  |
| H  | 4.393949000000  | 2.599682000000  | 1.532879000000  |
| C  | 2.061701000000  | -1.129860000000 | -0.158011000000 |
| C  | 2.764478000000  | -1.454919000000 | 1.003654000000  |
| C  | 2.610614000000  | -1.429233000000 | -1.406305000000 |
| C  | 4.025157000000  | -2.047311000000 | 0.914143000000  |
| C  | 3.873051000000  | -2.017673000000 | -1.489581000000 |
| C  | 4.583086000000  | -2.322981000000 | -0.331016000000 |
| H  | 2.345130000000  | -1.243724000000 | 1.985541000000  |
| H  | 2.067316000000  | -1.202755000000 | -2.321328000000 |
| H  | 4.568181000000  | -2.293071000000 | 1.822068000000  |
| H  | 4.298352000000  | -2.240269000000 | -2.463650000000 |
| H  | 5.562945000000  | -2.784278000000 | -0.399211000000 |

Zero-point correction= 0.496034 (Hartree/Particle)  
Thermal correction to Energy= 0.523177  
Thermal correction to Enthalpy= 0.524121  
Thermal correction to Gibbs Free Energy= 0.435883

Sum of electronic and zero-point Energies= -1226.605378  
 Sum of electronic and thermal Energies= -1226.578235  
 Sum of electronic and thermal Enthalpies= -1226.577291  
 Sum of electronic and thermal Free Energies= -1226.665530  
 E(RM06L) = -1227.81949251

### Int1-C2-Pd

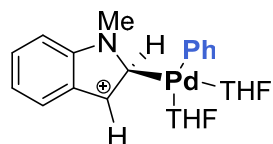

|    |                 |                 |                 |
|----|-----------------|-----------------|-----------------|
| Pd | 0.517202000000  | -0.037791000000 | -0.051690000000 |
| C  | -2.731718000000 | -1.480706000000 | -0.868203000000 |
| C  | -2.813778000000 | -1.300302000000 | 0.542623000000  |
| C  | -4.006833000000 | -0.878097000000 | 1.164253000000  |
| C  | -5.094272000000 | -0.662801000000 | 0.350090000000  |
| C  | -5.033409000000 | -0.840768000000 | -1.060510000000 |
| C  | -3.872863000000 | -1.241861000000 | -1.672593000000 |
| C  | -1.417214000000 | -1.888430000000 | -1.146304000000 |
| C  | -0.687554000000 | -1.858039000000 | 0.061068000000  |
| H  | -4.071114000000 | -0.742888000000 | 2.238997000000  |
| H  | -6.033884000000 | -0.350332000000 | 0.795073000000  |
| H  | -5.925590000000 | -0.659416000000 | -1.650125000000 |
| H  | -3.824126000000 | -1.383016000000 | -2.747788000000 |
| H  | 0.105276000000  | -2.566276000000 | 0.292890000000  |
| N  | -1.611247000000 | -1.583362000000 | 1.093207000000  |
| C  | -1.299901000000 | -1.574875000000 | 2.508646000000  |
| H  | -1.301943000000 | -0.557271000000 | 2.912710000000  |
| H  | -2.027274000000 | -2.181270000000 | 3.055266000000  |
| H  | -0.307915000000 | -2.006888000000 | 2.650013000000  |
| H  | -1.002197000000 | -2.171893000000 | -2.104590000000 |
| O  | -1.269380000000 | 1.272893000000  | -0.039332000000 |
| C  | -3.052184000000 | 2.544377000000  | -0.824630000000 |
| C  | -2.664504000000 | 3.097979000000  | 0.552091000000  |
| C  | -1.766468000000 | 1.859304000000  | -1.253760000000 |
| C  | -1.718415000000 | 2.025997000000  | 1.102254000000  |
| H  | -3.367066000000 | 3.322263000000  | -1.523408000000 |
| H  | -1.905132000000 | 1.048281000000  | -1.970940000000 |
| H  | -3.525172000000 | 3.256292000000  | 1.205097000000  |
| H  | -2.230454000000 | 1.325224000000  | 1.768867000000  |
| H  | -2.141439000000 | 4.053018000000  | 0.443515000000  |
| H  | -0.846105000000 | 2.443045000000  | 1.614608000000  |
| H  | -1.025638000000 | 2.571251000000  | -1.639891000000 |
| H  | -3.852840000000 | 1.803096000000  | -0.737769000000 |
| O  | 1.784609000000  | 1.717592000000  | -0.025927000000 |
| C  | 3.776479000000  | 2.739862000000  | 0.749817000000  |
| C  | 4.031613000000  | 2.104821000000  | -0.620399000000 |
| C  | 2.504741000000  | 2.030211000000  | 1.196678000000  |
| C  | 2.623570000000  | 2.000724000000  | -1.178840000000 |
| H  | 3.608206000000  | 3.816782000000  | 0.648791000000  |
| H  | 2.732714000000  | 1.089870000000  | 1.705597000000  |
| H  | 4.466162000000  | 1.105098000000  | -0.510634000000 |
| H  | 2.493268000000  | 1.194227000000  | -1.900652000000 |
| H  | 4.684875000000  | 2.705950000000  | -1.256507000000 |
| H  | 2.275289000000  | 2.944364000000  | -1.611977000000 |
| H  | 1.844329000000  | 2.638678000000  | 1.818776000000  |
| H  | 4.595194000000  | 2.583664000000  | 1.455328000000  |
| C  | 2.126325000000  | -1.154168000000 | -0.124193000000 |
| C  | 2.775333000000  | -1.516779000000 | 1.056938000000  |
| C  | 2.682444000000  | -1.495851000000 | -1.357592000000 |
| C  | 4.001156000000  | -2.182335000000 | 1.001814000000  |
| C  | 3.909175000000  | -2.159563000000 | -1.405933000000 |
| C  | 4.571751000000  | -2.497426000000 | -0.228318000000 |
| H  | 2.338765000000  | -1.281644000000 | 2.025945000000  |
| H  | 2.173525000000  | -1.244728000000 | -2.285844000000 |
| H  | 4.506033000000  | -2.455832000000 | 1.923681000000  |
| H  | 4.344153000000  | -2.414554000000 | -2.367780000000 |
| H  | 5.524849000000  | -3.014690000000 | -0.269854000000 |

Zero-point correction= 0.495804 (Hartree/Particle)  
 Thermal correction to Energy= 0.523099  
 Thermal correction to Enthalpy= 0.524044  
 Thermal correction to Gibbs Free Energy= 0.434790  
 Sum of electronic and zero-point Energies= -1226.588998  
 Sum of electronic and thermal Energies= -1226.561703  
 Sum of electronic and thermal Enthalpies= -1226.560758  
 Sum of electronic and thermal Free Energies= -1226.650012  
 E(RM06L) = -1227.80388747

### TS-Heck-C2-Indole

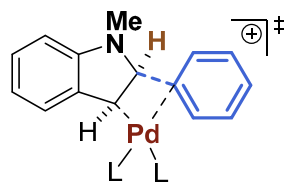

|    |              |              |              |
|----|--------------|--------------|--------------|
| Pd | 0.327144000  | 0.253948000  | -0.399260000 |
| C  | -2.535492000 | 0.317255000  | -0.328346000 |
| C  | -3.069938000 | -0.935740000 | 0.021232000  |
| C  | -4.064298000 | -1.069085000 | 0.988363000  |
| C  | -4.541719000 | 0.097587000  | 1.574226000  |
| C  | -4.043901000 | 1.357970000  | 1.213554000  |
| C  | -3.037518000 | 1.475908000  | 0.264271000  |
| C  | -1.463479000 | 0.082644000  | -1.303887000 |
| C  | -1.403762000 | -1.375075000 | -1.440210000 |
| H  | -4.461785000 | -2.038270000 | 1.270792000  |
| H  | -5.322701000 | 0.030025000  | 2.324665000  |
| H  | -4.450296000 | 2.246536000  | 1.684948000  |
| H  | -2.643225000 | 2.450010000  | -0.010794000 |
| H  | -1.105941000 | -1.862777000 | -2.361297000 |
| N  | -2.463421000 | -1.921976000 | -0.752403000 |
| C  | -2.680584000 | -3.341133000 | -0.592564000 |
| H  | -2.204704000 | -3.718302000 | 0.321527000  |
| H  | -3.753186000 | -3.544577000 | -0.556420000 |
| H  | -2.254382000 | -3.865877000 | -1.449638000 |
| H  | -1.366569000 | 0.693079000  | -2.203835000 |
| C  | 0.240502000  | -1.810399000 | -0.424619000 |
| C  | -0.035299000 | -2.334751000 | 0.851773000  |
| C  | 1.242169000  | -2.414297000 | -1.204240000 |
| C  | 0.692957000  | -3.413458000 | 1.344688000  |
| C  | 1.975241000  | -3.485929000 | -0.704430000 |
| C  | 1.699980000  | -3.987199000 | 0.568253000  |
| H  | -0.830347000 | -1.897782000 | 1.452244000  |
| H  | 1.442902000  | -2.045176000 | -2.207578000 |
| H  | 0.475702000  | -3.807369000 | 2.332797000  |
| H  | 2.750466000  | -3.942064000 | -1.312530000 |
| H  | 2.262115000  | -4.833674000 | 0.949824000  |
| O  | 2.382530000  | 0.432162000  | 0.493089000  |
| C  | 4.423411000  | -0.675487000 | 0.928396000  |
| C  | 4.713295000  | 0.665219000  | 0.247032000  |
| C  | 2.998607000  | -0.480046000 | 1.430537000  |
| C  | 3.373211000  | 0.974027000  | -0.405446000 |
| H  | 5.119356000  | -0.907832000 | 1.737368000  |
| H  | 2.412376000  | -1.398461000 | 1.450627000  |
| H  | 5.525204000  | 0.612974000  | -0.481664000 |
| H  | 3.275432000  | 0.474185000  | -1.377313000 |
| H  | 4.965203000  | 1.429034000  | 0.990224000  |
| H  | 3.160218000  | 2.038285000  | -0.527034000 |
| H  | 2.969648000  | -0.009142000 | 2.419136000  |
| H  | 4.457267000  | -1.491444000 | 0.198244000  |
| O  | 0.385729000  | 2.451830000  | -0.307455000 |
| C  | 0.461094000  | 4.549410000  | 0.725821000  |
| C  | -0.409987000 | 4.670358000  | -0.529671000 |
| C  | 0.400358000  | 3.056063000  | 1.002913000  |
| C  | -0.073654000 | 3.393819000  | -1.299655000 |
| H  | 0.087663000  | 5.143354000  | 1.562677000  |
| H  | 1.265058000  | 2.650834000  | 1.531011000  |



|   |              |             |              |
|---|--------------|-------------|--------------|
| H | -0.200186000 | 5.568459000 | -1.114165000 |
| H | 0.739958000  | 3.536870000 | -2.017248000 |
| H | -1.470145000 | 4.686535000 | -0.254635000 |
| H | -0.935618000 | 2.966903000 | -1.819688000 |
| H | -0.517904000 | 2.772643000 | 1.532414000  |
| H | 1.490516000  | 4.857341000 | 0.515090000  |

Zero-point correction= 0.494986 (Hartree/Particle)  
 Thermal correction to Energy= 0.521502  
 Thermal correction to Enthalpy= 0.522446  
 Thermal correction to Gibbs Free Energy= 0.435148  
 Sum of electronic and zero-point Energies= -1226.584587  
 Sum of electronic and thermal Energies= -1226.558071  
 Sum of electronic and thermal Enthalpies= -1226.557127  
 Sum of electronic and thermal Free Energies= -1226.644425  
 E(RM06L) = -1227.79090820

### TS-Heck-C3-Indole

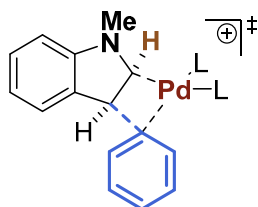

|    |              |              |              |
|----|--------------|--------------|--------------|
| Pd | 0.390619000  | -0.240639000 | -0.436032000 |
| C  | -2.998520000 | -0.203442000 | -0.451407000 |
| C  | -2.876433000 | -1.459045000 | 0.168369000  |
| C  | -3.771917000 | -1.883508000 | 1.152161000  |
| C  | -4.808788000 | -1.021475000 | 1.477455000  |
| C  | -4.952109000 | 0.231350000  | 0.856607000  |
| C  | -4.045394000 | 0.652417000  | -0.103437000 |
| C  | -1.878222000 | -0.061863000 | -1.373488000 |
| C  | -1.154302000 | -1.314250000 | -1.291062000 |
| H  | -3.673205000 | -2.850276000 | 1.634600000  |
| H  | -5.530962000 | -1.324855000 | 2.228684000  |
| H  | -5.780367000 | 0.873356000  | 1.136477000  |
| H  | -4.138851000 | 1.627581000  | -0.571328000 |
| H  | -0.676948000 | -1.796626000 | -2.142789000 |
| N  | -1.786616000 | -2.127399000 | -0.357375000 |
| C  | -1.378324000 | -3.467495000 | 0.001305000  |
| H  | -1.234504000 | -3.548819000 | 1.084133000  |
| H  | -2.130280000 | -4.199490000 | -0.310988000 |
| H  | -0.429521000 | -3.686023000 | -0.490894000 |
| H  | -1.963432000 | 0.460637000  | -2.316860000 |
| C  | -0.701583000 | 1.474289000  | -0.642092000 |
| C  | -0.232327000 | 2.318321000  | -1.658409000 |
| C  | -1.190050000 | 2.027559000  | 0.547203000  |
| C  | -0.186642000 | 3.695372000  | -1.454592000 |
| C  | -1.141330000 | 3.404717000  | 0.743608000  |
| C  | -0.637282000 | 4.239740000  | -0.252907000 |
| H  | 0.092161000  | 1.902828000  | -2.609705000 |
| H  | -1.621911000 | 1.384716000  | 1.309683000  |
| H  | 0.183696000  | 4.344465000  | -2.242335000 |
| H  | -1.515180000 | 3.828192000  | 1.670989000  |
| H  | -0.618661000 | 5.314557000  | -0.103082000 |
| O  | 2.146192000  | 0.839225000  | 0.530201000  |
| C  | 3.063243000  | 3.014725000  | 0.501799000  |
| C  | 3.019851000  | 2.515777000  | 1.948761000  |
| C  | 2.962550000  | 1.713822000  | -0.280974000 |
| C  | 1.999075000  | 1.388849000  | 1.858836000  |
| H  | 3.971292000  | 3.573080000  | 0.263980000  |
| H  | 2.477634000  | 1.828395000  | -1.253007000 |
| H  | 2.716508000  | 3.286186000  | 2.660781000  |
| H  | 0.977064000  | 1.765324000  | 1.964626000  |
| H  | 3.998413000  | 2.130339000  | 2.253524000  |
| H  | 2.162979000  | 0.579798000  | 2.575390000  |
| H  | 3.939523000  | 1.234424000  | -0.413702000 |

|   |             |              |              |
|---|-------------|--------------|--------------|
| H | 2.194813000 | 3.646682000  | 0.288010000  |
| O | 1.668046000 | -2.051098000 | -0.257108000 |
| C | 3.137319000 | -3.506450000 | 0.818267000  |
| C | 3.902597000 | -2.873530000 | -0.350920000 |
| C | 2.053625000 | -2.470960000 | 1.064586000  |
| C | 2.804492000 | -2.161534000 | -1.149184000 |
| H | 3.764691000 | -3.673023000 | 1.696416000  |
| H | 1.155642000 | -2.851381000 | 1.555453000  |
| H | 4.438681000 | -3.607342000 | -0.955954000 |
| H | 2.468046000 | -2.732060000 | -2.018875000 |
| H | 4.631147000 | -2.148271000 | 0.024406000  |
| H | 3.100225000 | -1.158494000 | -1.469734000 |
| H | 2.438099000 | -1.606493000 | 1.618804000  |
| H | 2.689985000 | -4.461541000 | 0.524731000  |

Zero-point correction= 0.495133 (Hartree/Particle)  
 Thermal correction to Energy= 0.521740  
 Thermal correction to Enthalpy= 0.522684  
 Thermal correction to Gibbs Free Energy= 0.435225  
 Sum of electronic and zero-point Energies= -1226.575570  
 Sum of electronic and thermal Energies= -1226.548963  
 Sum of electronic and thermal Enthalpies= -1226.548019  
 Sum of electronic and thermal Free Energies= -1226.635478  
 E(RM06L) = -1227.78721045

## Int2

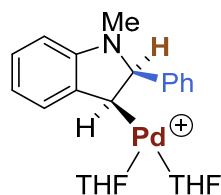

|    |              |              |              |
|----|--------------|--------------|--------------|
| Pd | 0.370736000  | -0.255477000 | -0.490080000 |
| C  | -2.377025000 | 0.589006000  | -0.434681000 |
| C  | -3.071118000 | -0.248751000 | 0.461581000  |
| C  | -3.995152000 | 0.280905000  | 1.362892000  |
| C  | -4.207710000 | 1.656180000  | 1.346282000  |
| C  | -3.537215000 | 2.496698000  | 0.449227000  |
| C  | -2.622362000 | 1.961238000  | -0.449520000 |
| C  | -1.494169000 | -0.244746000 | -1.252726000 |
| C  | -1.838068000 | -1.688067000 | -0.871245000 |
| H  | -4.548937000 | -0.353516000 | 2.046506000  |
| H  | -4.928598000 | 2.083074000  | 2.036721000  |
| H  | -3.747985000 | 3.560786000  | 0.445509000  |
| H  | -2.116610000 | 2.597264000  | -1.170327000 |
| H  | -2.320949000 | -2.258009000 | -1.677940000 |
| N  | -2.708455000 | -1.570842000 | 0.282727000  |
| C  | -3.572495000 | -2.673745000 | 0.648941000  |
| H  | -3.848561000 | -2.600411000 | 1.704235000  |
| H  | -4.489312000 | -2.703007000 | 0.043547000  |
| H  | -3.030584000 | -3.613433000 | 0.512910000  |
| H  | -1.386823000 | -0.017625000 | -2.316455000 |
| C  | -0.464025000 | -2.308898000 | -0.523835000 |
| C  | -0.157400000 | -2.778855000 | 0.775217000  |
| C  | 0.480926000  | -2.512080000 | -1.559110000 |
| C  | 1.035344000  | -3.440073000 | 1.015427000  |
| C  | 1.682145000  | -3.184454000 | -1.300197000 |
| C  | 1.953086000  | -3.647276000 | -0.021638000 |
| H  | -0.882457000 | -2.627311000 | 1.567880000  |
| H  | 0.228251000  | -2.240392000 | -2.581294000 |
| H  | 1.250998000  | -3.813378000 | 2.011505000  |
| H  | 2.387612000  | -3.351533000 | -2.107334000 |
| H  | 2.877462000  | -4.180884000 | 0.175401000  |
| O  | 2.430995000  | -0.448735000 | 0.463910000  |
| C  | 4.000854000  | 1.265198000  | 0.609997000  |
| C  | 3.721963000  | 0.788120000  | 2.046734000  |
| C  | 3.581820000  | 0.059545000  | -0.217466000 |
| C  | 2.634662000  | -0.293249000 | 1.877484000  |
| H  | 5.045157000  | 1.543365000  | 0.452261000  |

|   |              |              |              |
|---|--------------|--------------|--------------|
| H | 3.282564000  | 0.291304000  | -1.241647000 |
| H | 3.394171000  | 1.602774000  | 2.697114000  |
| H | 1.670907000  | -0.019103000 | 2.314444000  |
| H | 4.622374000  | 0.356502000  | 2.491464000  |
| H | 2.941940000  | -1.257851000 | 2.294856000  |
| H | 4.359509000  | -0.715209000 | -0.236213000 |
| H | 3.370820000  | 2.121702000  | 0.350155000  |
| O | 0.753139000  | 1.899840000  | -0.462991000 |
| C | 0.485216000  | 4.163719000  | -1.102807000 |
| C | 0.939320000  | 4.084705000  | 0.359448000  |
| C | 0.770921000  | 2.756987000  | -1.625334000 |
| C | 0.542016000  | 2.667133000  | 0.740543000  |
| H | 1.015603000  | 4.928166000  | -1.674186000 |
| H | 0.022810000  | 2.393901000  | -2.335296000 |
| H | 0.459389000  | 4.832574000  | 0.994080000  |
| H | -0.513125000 | 2.592499000  | 1.025517000  |
| H | 2.024271000  | 4.213900000  | 0.435951000  |
| H | 1.165277000  | 2.223089000  | 1.519884000  |
| H | 1.763568000  | 2.670188000  | -2.078715000 |
| H | -0.585676000 | 4.384127000  | -1.154588000 |

Zero-point correction= 0.497205 (Hartree/Particle)  
 Thermal correction to Energy= 0.523717  
 Thermal correction to Enthalpy= 0.524661  
 Thermal correction to Gibbs Free Energy= 0.438725  
 Sum of electronic and zero-point Energies= -1226.602377  
 Sum of electronic and thermal Energies= -1226.575865  
 Sum of electronic and thermal Enthalpies= -1226.574921  
 Sum of electronic and thermal Free Energies= -1226.660857  
 E(RM06L) = -1227.81264787

### TS-Heck-C2-Benzothiophene

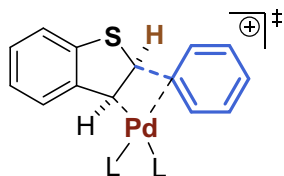

|    |              |              |              |
|----|--------------|--------------|--------------|
| Pd | 0.143896000  | 0.149672000  | -0.500582000 |
| C  | -2.432907000 | -1.094279000 | -0.462392000 |
| C  | -2.389153000 | -2.142320000 | 0.470657000  |
| C  | -3.366504000 | -2.284229000 | 1.453088000  |
| C  | -4.420597000 | -1.378760000 | 1.464248000  |
| C  | -4.500119000 | -0.352226000 | 0.514648000  |
| C  | -3.510620000 | -0.202344000 | -0.445961000 |
| C  | -1.268980000 | -1.088397000 | -1.353212000 |
| C  | -0.386167000 | -2.189950000 | -1.071117000 |
| H  | -3.321651000 | -3.089865000 | 2.178416000  |
| H  | -5.200704000 | -1.480338000 | 2.211661000  |
| H  | -5.344369000 | 0.329387000  | 0.530308000  |
| H  | -3.557614000 | 0.599135000  | -1.176127000 |
| H  | 0.132791000  | -2.703370000 | -1.869286000 |
| S  | -1.020726000 | -3.219792000 | 0.205990000  |
| H  | -1.356780000 | -0.723449000 | -2.377076000 |
| C  | 1.466989000  | -1.416693000 | -0.488015000 |
| C  | 1.885360000  | -1.841734000 | 0.775951000  |
| C  | 2.370458000  | -1.408979000 | -1.558653000 |
| C  | 3.219558000  | -2.175771000 | 0.986931000  |
| C  | 3.702643000  | -1.755539000 | -1.342998000 |
| C  | 4.129213000  | -2.128675000 | -0.069902000 |
| H  | 1.168010000  | -1.922935000 | 1.588685000  |
| H  | 2.038922000  | -1.134608000 | -2.557451000 |
| H  | 3.545297000  | -2.495444000 | 1.972215000  |
| H  | 4.403810000  | -1.744373000 | -2.171677000 |
| H  | 5.164702000  | -2.409058000 | 0.094040000  |
| O  | 1.642053000  | 1.513084000  | 0.462360000  |
| C  | 3.419014000  | 1.520635000  | 2.024194000  |
| C  | 3.803801000  | 2.379712000  | 0.815915000  |
| C  | 1.905384000  | 1.428818000  | 1.882842000  |
| C  | 2.855072000  | 1.852070000  | -0.249378000 |

|   |              |             |              |
|---|--------------|-------------|--------------|
| H | 3.718947000  | 1.957911000 | 2.978777000  |
| H | 1.487564000  | 0.491515000 | 2.257209000  |
| H | 4.850481000  | 2.265328000 | 0.526396000  |
| H | 3.245683000  | 0.946181000 | -0.722698000 |
| H | 3.613665000  | 3.439199000 | 1.016196000  |
| H | 2.589615000  | 2.580149000 | -1.019505000 |
| H | 1.395060000  | 2.269691000 | 2.365177000  |
| H | 3.867134000  | 0.525146000 | 1.938026000  |
| O | -1.180381000 | 1.882877000 | -0.516562000 |
| C | -2.571973000 | 3.508659000 | 0.366504000  |
| C | -1.814971000 | 4.153476000 | -0.813985000 |
| C | -1.672412000 | 2.346112000 | 0.752631000  |
| C | -0.855351000 | 3.049310000 | -1.298498000 |
| H | -3.545248000 | 3.126948000 | 0.044295000  |
| H | -0.824308000 | 2.668539000 | 1.371257000  |
| H | -1.251644000 | 5.031633000 | -0.489240000 |
| H | 0.193190000  | 3.309647000 | -1.117221000 |
| H | -2.498567000 | 4.471900000 | -1.603213000 |
| H | -0.984662000 | 2.771299000 | -2.345806000 |
| H | -2.183286000 | 1.506960000 | 1.227048000  |
| H | -2.733412000 | 4.203586000 | 1.193140000  |

Zero-point correction= 0.451369 (Hartree/Particle)  
 Thermal correction to Energy= 0.476466  
 Thermal correction to Enthalpy= 0.477410  
 Thermal correction to Gibbs Free Energy= 0.393463  
 Sum of electronic and zero-point Energies= -1530.145197  
 Sum of electronic and thermal Energies= -1530.120100  
 Sum of electronic and thermal Enthalpies= -1530.119156  
 Sum of electronic and thermal Free Energies= -1530.203103  
 E(RM06L) = -1531.29891797

### TS-Heck-C3-Benzothiophene

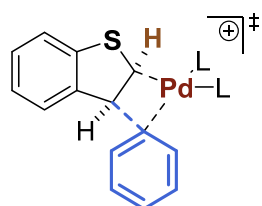

|    |              |              |              |
|----|--------------|--------------|--------------|
| Pd | 0.606964000  | -0.219749000 | -0.454179000 |
| C  | -2.874121000 | -0.842943000 | -0.509316000 |
| C  | -2.714013000 | -1.860845000 | 0.441200000  |
| C  | -3.706615000 | -2.127301000 | 1.386384000  |
| C  | -4.870759000 | -1.374529000 | 1.340812000  |
| C  | -5.048761000 | -0.364450000 | 0.382414000  |
| C  | -4.052487000 | -0.088387000 | -0.536620000 |
| C  | -1.696956000 | -0.674497000 | -1.348865000 |
| C  | -0.690247000 | -1.662237000 | -1.076556000 |
| H  | -3.580347000 | -2.909340000 | 2.127638000  |
| H  | -5.659603000 | -1.575098000 | 2.058658000  |
| H  | -5.972666000 | 0.203740000  | 0.367933000  |
| H  | -4.167672000 | 0.710497000  | -1.263160000 |
| H  | -0.163703000 | -2.154162000 | -1.894196000 |
| S  | -1.183186000 | -2.706526000 | 0.278542000  |
| H  | -1.789282000 | -0.273633000 | -2.351827000 |
| C  | -0.921234000 | 1.135891000  | -0.600523000 |
| C  | -0.838202000 | 2.070822000  | -1.637819000 |
| C  | -1.456758000 | 1.513360000  | 0.637936000  |
| C  | -1.228751000 | 3.390975000  | -1.415875000 |
| C  | -1.834651000 | 2.832474000  | 0.856224000  |
| C  | -1.720649000 | 3.772646000  | -0.169972000 |
| H  | -0.469633000 | 1.774254000  | -2.617046000 |
| H  | -1.596282000 | 0.771244000  | 1.420692000  |
| H  | -1.161404000 | 4.115907000  | -2.221209000 |
| H  | -2.238617000 | 3.125023000  | 1.820534000  |
| H  | -2.037431000 | 4.797334000  | -0.003423000 |
| O  | 1.980189000  | 1.365445000  | 0.316278000  |

|   |             |              |              |
|---|-------------|--------------|--------------|
| C | 2.171438000 | 3.698363000  | 0.583656000  |
| C | 2.542147000 | 3.018721000  | 1.905236000  |
| C | 2.339555000 | 2.561833000  | -0.412898000 |
| C | 1.916725000 | 1.640413000  | 1.734639000  |
| H | 2.805708000 | 4.555058000  | 0.345888000  |
| H | 1.686092000 | 2.639159000  | -1.282672000 |
| H | 2.150196000 | 3.538934000  | 2.781750000  |
| H | 0.864245000 | 1.637238000  | 2.037398000  |
| H | 3.629448000 | 2.941477000  | 2.008416000  |
| H | 2.446274000 | 0.835533000  | 2.250397000  |
| H | 3.378261000 | 2.451445000  | -0.745059000 |
| H | 1.127445000 | 4.029224000  | 0.600260000  |
| O | 2.329743000 | -1.588274000 | -0.353992000 |
| C | 4.550179000 | -2.030767000 | 0.276403000  |
| C | 3.775686000 | -3.351997000 | 0.267901000  |
| C | 3.683921000 | -1.151418000 | -0.611846000 |
| C | 2.323807000 | -2.884562000 | 0.286006000  |
| H | 5.567721000 | -2.130747000 | -0.107404000 |
| H | 3.734040000 | -0.088505000 | -0.375815000 |
| H | 4.009551000 | -3.993842000 | 1.119794000  |
| H | 1.935195000 | -2.759712000 | 1.301721000  |
| H | 3.986647000 | -3.910334000 | -0.649672000 |
| H | 1.654854000 | -3.540756000 | -0.277162000 |
| H | 3.894705000 | -1.305921000 | -1.675866000 |
| H | 4.601879000 | -1.617895000 | 1.289605000  |

Zero-point correction= 0.450787 (Hartree/Particle)  
 Thermal correction to Energy= 0.476062  
 Thermal correction to Enthalpy= 0.477006  
 Thermal correction to Gibbs Free Energy= 0.392933  
 Sum of electronic and zero-point Energies= -1530.146644  
 Sum of electronic and thermal Energies= -1530.121368  
 Sum of electronic and thermal Enthalpies= -1530.120424  
 Sum of electronic and thermal Free Energies= -1530.204497  
 E(RM06L) = -1531.29908460

### TS-Heck-C2-Benzofuran

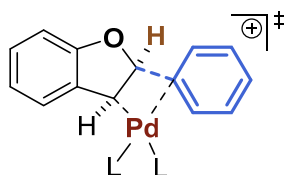

|    |                 |                 |                 |
|----|-----------------|-----------------|-----------------|
| Pd | 0.280159000000  | 0.922344000000  | -0.198332000000 |
| C  | -2.183552000000 | -0.461690000000 | -0.485018000000 |
| C  | -1.897079000000 | -1.805120000000 | -0.239188000000 |
| C  | -2.639915000000 | -2.611458000000 | 0.605284000000  |
| C  | -3.738774000000 | -2.009775000000 | 1.211603000000  |
| C  | -4.061256000000 | -0.664832000000 | 0.977552000000  |
| C  | -3.289337000000 | 0.123781000000  | 0.134074000000  |
| C  | -1.125967000000 | 0.022930000000  | -1.382831000000 |
| C  | -0.289035000000 | -1.131542000000 | -1.580064000000 |
| H  | -2.387390000000 | -3.653014000000 | 0.766708000000  |
| H  | -4.364029000000 | -2.598961000000 | 1.874080000000  |
| H  | -4.929997000000 | -0.235439000000 | 1.464838000000  |
| H  | -3.538799000000 | 1.166323000000  | -0.032995000000 |
| H  | 0.299813000000  | -1.353942000000 | -2.458299000000 |
| O  | -0.795744000000 | -2.214346000000 | -0.958931000000 |
| H  | -1.292630000000 | 0.726864000000  | -2.197369000000 |
| C  | 1.449049000000  | -0.727225000000 | -0.448603000000 |
| C  | 1.519767000000  | -1.591962000000 | 0.649265000000  |
| C  | 2.581225000000  | -0.507688000000 | -1.245971000000 |
| C  | 2.734349000000  | -2.183906000000 | 0.984112000000  |
| C  | 3.794145000000  | -1.100144000000 | -0.900671000000 |
| C  | 3.870546000000  | -1.932648000000 | 0.215202000000  |
| H  | 0.628906000000  | -1.808970000000 | 1.233182000000  |
| H  | 2.516482000000  | 0.115289000000  | -2.135221000000 |
| H  | 2.791258000000  | -2.852259000000 | 1.837705000000  |

|   |                 |                 |                 |
|---|-----------------|-----------------|-----------------|
| H | 4.673324000000  | -0.927446000000 | -1.513618000000 |
| H | 4.812592000000  | -2.406571000000 | 0.471494000000  |
| C | 1.917375000000  | 1.476882000000  | 2.483088000000  |
| H | 0.935150000000  | 1.626790000000  | 2.931236000000  |
| H | 2.184622000000  | 0.417581000000  | 2.524699000000  |
| H | 2.657251000000  | 2.081326000000  | 3.013268000000  |
| O | 1.814654000000  | 1.920445000000  | 1.116813000000  |
| H | 2.678088000000  | 1.811634000000  | 0.693352000000  |
| C | -1.511392000000 | 3.546553000000  | -0.840823000000 |
| H | -2.272943000000 | 2.865026000000  | -1.219195000000 |
| H | -1.999463000000 | 4.413886000000  | -0.390149000000 |
| H | -0.858964000000 | 3.860175000000  | -1.661269000000 |
| O | -0.777536000000 | 2.825990000000  | 0.157621000000  |
| H | -0.132470000000 | 3.414242000000  | 0.574740000000  |

Zero-point correction= 0.321644 (Hartree/Particle)  
 Thermal correction to Energy= 0.342407  
 Thermal correction to Enthalpy= 0.343351  
 Thermal correction to Gibbs Free Energy= 0.270061  
 Sum of electronic and zero-point Energies= -973.883109  
 Sum of electronic and thermal Energies= -973.862345  
 Sum of electronic and thermal Enthalpies= -973.861401  
 Sum of electronic and thermal Free Energies= -973.934691  
 E(RM06L) = -974.825379782

### TS-Heck-C3-Benzofuran

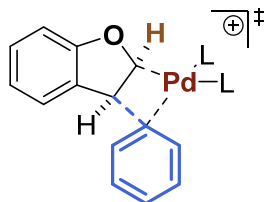

|    |                 |                 |                 |
|----|-----------------|-----------------|-----------------|
| Pd | 1.005532000000  | -0.549383000000 | -0.217237000000 |
| C  | -2.295179000000 | -0.094717000000 | -0.587742000000 |
| C  | -2.355265000000 | -1.371630000000 | -0.026960000000 |
| C  | -3.359531000000 | -1.769106000000 | 0.843470000000  |
| C  | -4.340200000000 | -0.823565000000 | 1.120521000000  |
| C  | -4.309823000000 | 0.464425000000  | 0.559626000000  |
| C  | -3.284814000000 | 0.845601000000  | -0.292742000000 |
| C  | -1.087132000000 | -0.057759000000 | -1.400105000000 |
| C  | -0.524772000000 | -1.373448000000 | -1.273835000000 |
| H  | -3.382331000000 | -2.765520000000 | 1.269118000000  |
| H  | -5.153961000000 | -1.091028000000 | 1.786739000000  |
| H  | -5.098595000000 | 1.168088000000  | 0.802208000000  |
| H  | -3.243682000000 | 1.844973000000  | -0.713622000000 |
| H  | -0.079615000000 | -1.932693000000 | -2.094273000000 |
| O  | -1.320454000000 | -2.160038000000 | -0.450988000000 |
| H  | -0.992441000000 | 0.515547000000  | -2.312341000000 |
| C  | 0.218739000000  | 1.322281000000  | -0.473644000000 |
| C  | 0.907218000000  | 2.127214000000  | -1.389560000000 |
| C  | -0.326219000000 | 1.881070000000  | 0.686715000000  |
| C  | 1.104858000000  | 3.477926000000  | -1.106445000000 |
| C  | -0.123007000000 | 3.231242000000  | 0.960603000000  |
| C  | 0.594397000000  | 4.027952000000  | 0.068626000000  |
| H  | 1.291283000000  | 1.706007000000  | -2.315332000000 |
| H  | -0.914106000000 | 1.269766000000  | 1.366500000000  |
| H  | 1.646617000000  | 4.101472000000  | -1.810776000000 |
| H  | -0.538047000000 | 3.664324000000  | 1.865471000000  |
| H  | 0.738649000000  | 5.082738000000  | 0.278837000000  |
| C  | 2.730257000000  | 0.294387000000  | 2.302367000000  |
| H  | 2.692118000000  | -0.767447000000 | 2.544530000000  |
| H  | 3.648983000000  | 0.728752000000  | 2.704055000000  |
| H  | 1.855554000000  | 0.802005000000  | 2.720754000000  |
| O  | 2.733260000000  | 0.380119000000  | 0.868890000000  |
| H  | 2.780957000000  | 1.311274000000  | 0.607181000000  |
| C  | 3.161412000000  | -2.878027000000 | -0.260361000000 |
| H  | 3.838503000000  | -2.037031000000 | -0.114914000000 |

|   |                |                 |                 |
|---|----------------|-----------------|-----------------|
| H | 3.544025000000 | -3.753580000000 | 0.268970000000  |
| H | 3.058087000000 | -3.092765000000 | -1.327923000000 |
| O | 1.900584000000 | -2.480615000000 | 0.306112000000  |
| H | 1.280780000000 | -3.222090000000 | 0.292387000000  |

Zero-point correction= 0.321681 (Hartree/Particle)  
 Thermal correction to Energy= 0.342468  
 Thermal correction to Enthalpy= 0.343412  
 Thermal correction to Gibbs Free Energy= 0.269381  
 Sum of electronic and zero-point Energies= -973.881054  
 Sum of electronic and thermal Energies= -973.860267  
 Sum of electronic and thermal Enthalpies= -973.859323  
 Sum of electronic and thermal Free Energies= -973.933354  
 E(RM06L) = -974.823750776

### Int2 (C3-Ar)

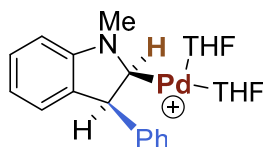

|    |                 |                 |                 |
|----|-----------------|-----------------|-----------------|
| Pd | -0.316205000000 | -0.094490000000 | -0.635938000000 |
| C  | 3.141634000000  | -0.436239000000 | -0.050176000000 |
| C  | 2.987707000000  | 0.930545000000  | 0.200741000000  |
| C  | 3.736560000000  | 1.590956000000  | 1.165050000000  |
| C  | 4.665388000000  | 0.837110000000  | 1.884584000000  |
| C  | 4.836703000000  | -0.524516000000 | 1.641269000000  |
| C  | 4.074580000000  | -1.170226000000 | 0.663740000000  |
| C  | 2.201929000000  | -0.835595000000 | -1.160469000000 |
| C  | 1.450583000000  | 0.474878000000  | -1.440287000000 |
| H  | 3.618688000000  | 2.653928000000  | 1.349088000000  |
| H  | 5.269595000000  | 1.326071000000  | 2.642020000000  |
| H  | 5.572018000000  | -1.085303000000 | 2.208132000000  |
| H  | 4.218653000000  | -2.228556000000 | 0.464532000000  |
| H  | 1.227882000000  | 0.759753000000  | -2.472133000000 |
| N  | 2.023937000000  | 1.470767000000  | -0.659073000000 |
| C  | 1.857994000000  | 2.890892000000  | -0.873641000000 |
| H  | 1.552060000000  | 3.393476000000  | 0.050148000000  |
| H  | 2.796111000000  | 3.339364000000  | -1.221120000000 |
| H  | 1.079405000000  | 3.048675000000  | -1.619899000000 |
| H  | 2.744064000000  | -1.206372000000 | -2.038877000000 |
| C  | 1.079411000000  | -1.830234000000 | -0.793755000000 |
| C  | 0.142035000000  | -2.175220000000 | -1.799953000000 |
| C  | 1.000367000000  | -2.489545000000 | 0.454952000000  |
| C  | -0.825216000000 | -3.164896000000 | -1.562639000000 |
| C  | 0.042027000000  | -3.465775000000 | 0.670720000000  |
| C  | -0.870678000000 | -3.806996000000 | -0.336274000000 |
| H  | 0.256329000000  | -1.774181000000 | -2.804398000000 |
| H  | 1.715193000000  | -2.240014000000 | 1.231661000000  |
| H  | -1.516255000000 | -3.436750000000 | -2.353913000000 |
| H  | 0.009731000000  | -3.980820000000 | 1.625809000000  |
| H  | -1.603680000000 | -4.587870000000 | -0.158850000000 |
| O  | -2.249705000000 | -0.655522000000 | 0.547133000000  |
| C  | -3.708806000000 | -0.815962000000 | 2.383664000000  |
| C  | -4.520243000000 | -0.895834000000 | 1.065709000000  |
| C  | -2.253915000000 | -1.006220000000 | 1.933134000000  |
| C  | -3.457510000000 | -1.191059000000 | 0.003167000000  |
| H  | -4.004075000000 | -1.583571000000 | 3.102186000000  |
| H  | -1.532651000000 | -0.359476000000 | 2.437166000000  |
| H  | -5.015297000000 | 0.056745000000  | 0.859716000000  |
| H  | -3.629264000000 | -0.707683000000 | -0.960648000000 |
| H  | -5.288529000000 | -1.671372000000 | 1.091226000000  |

|   |                 |                 |                 |
|---|-----------------|-----------------|-----------------|
| H | -3.330287000000 | -2.269456000000 | -0.157952000000 |
| H | -1.928295000000 | -2.048629000000 | 2.038858000000  |
| H | -3.845099000000 | 0.156108000000  | 2.864294000000  |
| O | -1.109605000000 | 1.974194000000  | -0.428684000000 |
| C | -1.729475000000 | 3.906495000000  | 0.685893000000  |
| C | -2.758162000000 | 3.692824000000  | -0.441574000000 |
| C | -1.191226000000 | 2.501941000000  | 0.902502000000  |
| C | -2.292378000000 | 2.396568000000  | -1.134310000000 |
| H | -2.174197000000 | 4.330059000000  | 1.588797000000  |
| H | -0.190581000000 | 2.445177000000  | 1.335897000000  |
| H | -2.787411000000 | 4.537335000000  | -1.132630000000 |
| H | -2.004380000000 | 2.527241000000  | -2.179093000000 |
| H | -3.762820000000 | 3.564309000000  | -0.030512000000 |
| H | -3.046928000000 | 1.605824000000  | -1.065079000000 |
| H | -1.881246000000 | 1.886381000000  | 1.495076000000  |
| H | -0.922224000000 | 4.568046000000  | 0.357270000000  |

Zero-point correction= 0.497469 (Hartree/Particle)  
 Thermal correction to Energy= 0.524380  
 Thermal correction to Enthalpy= 0.525324  
 Thermal correction to Gibbs Free Energy= 0.435860  
 Sum of electronic and zero-point Energies= -1226.604699  
 Sum of electronic and thermal Energies= -1226.577788  
 Sum of electronic and thermal Enthalpies= -1226.576844  
 Sum of electronic and thermal Free Energies= -1226.666308  
 E(RM06L) = -1227.81620867

### Int2 (C2-Ar/Indole)

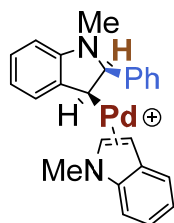

|    |                 |                 |                 |
|----|-----------------|-----------------|-----------------|
| Pd | -0.242468000000 | 0.291420000000  | -0.358682000000 |
| C  | 2.347710000000  | -1.039511000000 | -0.828840000000 |
| C  | 3.270026000000  | -0.516235000000 | 0.103604000000  |
| C  | 4.172327000000  | -1.358660000000 | 0.757731000000  |
| C  | 4.118449000000  | -2.716814000000 | 0.467277000000  |
| C  | 3.207417000000  | -3.247128000000 | -0.460155000000 |
| C  | 2.321260000000  | -2.407052000000 | -1.117173000000 |
| C  | 1.551583000000  | 0.061565000000  | -1.337902000000 |
| C  | 2.184820000000  | 1.331429000000  | -0.769970000000 |
| H  | 4.901223000000  | -0.974757000000 | 1.463090000000  |
| H  | 4.814480000000  | -3.385501000000 | 0.964233000000  |
| H  | 3.212968000000  | -4.310637000000 | -0.672059000000 |
| H  | 1.621957000000  | -2.798843000000 | -1.851331000000 |
| H  | 2.698364000000  | 1.918732000000  | -1.546147000000 |
| N  | 3.118204000000  | 0.847304000000  | 0.227316000000  |
| C  | 4.130326000000  | 1.730680000000  | 0.765314000000  |
| H  | 4.501591000000  | 1.339524000000  | 1.715661000000  |
| H  | 4.976991000000  | 1.858344000000  | 0.077367000000  |
| H  | 3.681192000000  | 2.708366000000  | 0.960396000000  |
| H  | 1.234999000000  | 0.070770000000  | -2.382062000000 |
| C  | 1.025860000000  | 2.154562000000  | -0.167937000000 |
| C  | 0.714383000000  | 2.065701000000  | 1.205281000000  |
| C  | 0.255049000000  | 3.007309000000  | -0.988890000000 |
| C  | -0.336188000000 | 2.822882000000  | 1.736834000000  |
| C  | -0.778894000000 | 3.760304000000  | -0.447127000000 |
| C  | -1.074523000000 | 3.668347000000  | 0.915982000000  |
| H  | 1.341886000000  | 1.458944000000  | 1.851091000000  |
| H  | 0.494409000000  | 3.091437000000  | -2.045838000000 |
| H  | -0.553982000000 | 2.762032000000  | 2.798122000000  |
| H  | -1.354969000000 | 4.421498000000  | -1.085602000000 |
| H  | -1.877847000000 | 4.265136000000  | 1.335300000000  |
| C  | -2.960276000000 | -1.329302000000 | 0.545459000000  |
| C  | -2.704841000000 | -1.091545000000 | -0.820964000000 |



|   |                 |                 |                 |
|---|-----------------|-----------------|-----------------|
| C | -3.712645000000 | -0.547244000000 | -1.627885000000 |
| C | -1.325781000000 | -1.486050000000 | -1.065715000000 |
| C | -4.179009000000 | -1.006955000000 | 1.144306000000  |
| N | -1.823624000000 | -1.895459000000 | 1.113580000000  |
| C | -5.157335000000 | -0.464398000000 | 0.325674000000  |
| H | -4.362001000000 | -1.182335000000 | 2.199337000000  |
| C | -4.930959000000 | -0.242834000000 | -1.045193000000 |
| H | -6.122889000000 | -0.211580000000 | 0.751347000000  |
| H | -5.727458000000 | 0.173902000000  | -1.652605000000 |
| H | -3.539069000000 | -0.370598000000 | -2.684805000000 |
| C | -0.846211000000 | -1.970158000000 | 0.168029000000  |
| H | -0.902608000000 | -1.734242000000 | -2.031640000000 |
| H | 0.085949000000  | -2.479600000000 | 0.379148000000  |
| C | -1.658477000000 | -2.170441000000 | 2.526905000000  |
| H | -1.678338000000 | -1.241520000000 | 3.106662000000  |
| H | -2.459073000000 | -2.829056000000 | 2.872886000000  |
| H | -0.700744000000 | -2.668936000000 | 2.682689000000  |

Zero-point correction= 0.416551 (Hartree/Particle)  
 Thermal correction to Energy= 0.440350  
 Thermal correction to Enthalpy= 0.441294  
 Thermal correction to Gibbs Free Energy= 0.360790  
 Sum of electronic and zero-point Energies= -1164.890466  
 Sum of electronic and thermal Energies= -1164.866668  
 Sum of electronic and thermal Enthalpies= -1164.865724  
 Sum of electronic and thermal Free Energies= -1164.946227  
 E(RM06L) = -1166.01372381

### Int2 (C3-Ar/Indole)

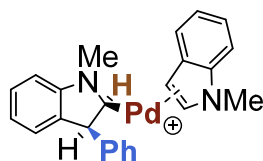

|    |                 |                 |                 |
|----|-----------------|-----------------|-----------------|
| Pd | 0.396938000000  | 0.199250000000  | -0.867607000000 |
| C  | -3.030636000000 | 0.423809000000  | 0.038943000000  |
| C  | -2.986577000000 | -0.947448000000 | -0.230966000000 |
| C  | -3.694893000000 | -1.875655000000 | 0.518548000000  |
| C  | -4.490214000000 | -1.384743000000 | 1.556241000000  |
| C  | -4.569646000000 | -0.018634000000 | 1.820776000000  |
| C  | -3.840667000000 | 0.897865000000  | 1.057431000000  |
| C  | -2.147944000000 | 1.141494000000  | -0.954027000000 |
| C  | -1.505149000000 | -0.034899000000 | -1.700961000000 |
| H  | -3.652325000000 | -2.938650000000 | 0.303415000000  |
| H  | -5.065039000000 | -2.081021000000 | 2.158010000000  |
| H  | -5.208879000000 | 0.337656000000  | 2.621354000000  |
| H  | -3.917113000000 | 1.962725000000  | 1.257689000000  |
| H  | -1.238480000000 | 0.053662000000  | -2.756518000000 |
| N  | -2.164717000000 | -1.179607000000 | -1.344344000000 |
| C  | -1.951658000000 | -2.480022000000 | -1.938699000000 |
| H  | -1.350684000000 | -3.127199000000 | -1.288429000000 |
| H  | -2.914825000000 | -2.963395000000 | -2.124080000000 |
| H  | -1.431782000000 | -2.356698000000 | -2.890485000000 |
| H  | -2.742573000000 | 1.767296000000  | -1.633556000000 |
| C  | -0.969582000000 | 1.952556000000  | -0.388851000000 |
| C  | -0.034739000000 | 2.492566000000  | -1.307081000000 |
| C  | -0.780356000000 | 2.196589000000  | 0.988633000000  |
| C  | 1.056265000000  | 3.254028000000  | -0.845543000000 |
| C  | 0.292259000000  | 2.958760000000  | 1.423664000000  |
| C  | 1.218412000000  | 3.481670000000  | 0.510566000000  |
| H  | -0.228727000000 | 2.441927000000  | -2.376543000000 |
| H  | -1.486720000000 | 1.790112000000  | 1.703985000000  |
| H  | 1.753989000000  | 3.671510000000  | -1.563794000000 |
| H  | 0.412662000000  | 3.155400000000  | 2.484436000000  |
| H  | 2.053654000000  | 4.075731000000  | 0.866017000000  |
| C  | 2.658409000000  | -1.088281000000 | 1.060318000000  |
| C  | 2.678234000000  | -1.385265000000 | -0.319359000000 |

|   |                 |                 |                 |
|---|-----------------|-----------------|-----------------|
| C | 3.866567000000  | -1.217693000000 | -1.044620000000 |
| C | 1.333208000000  | -1.808519000000 | -0.677843000000 |
| C | 3.774539000000  | -0.582893000000 | 1.730249000000  |
| N | 1.390820000000  | -1.370466000000 | 1.553274000000  |
| C | 4.932663000000  | -0.417031000000 | 0.988711000000  |
| H | 3.745126000000  | -0.341434000000 | 2.787709000000  |
| C | 4.982014000000  | -0.738207000000 | -0.381203000000 |
| H | 5.824598000000  | -0.036493000000 | 1.475616000000  |
| H | 5.912996000000  | -0.604270000000 | -0.921861000000 |
| H | 3.906453000000  | -1.456391000000 | -2.102941000000 |
| C | 0.595508000000  | -1.766402000000 | 0.517471000000  |
| H | 1.062798000000  | -2.378377000000 | -1.558794000000 |
| H | -0.410019000000 | -2.115412000000 | 0.717300000000  |
| C | 0.910735000000  | -0.975457000000 | 2.861052000000  |
| H | 1.605970000000  | -1.319279000000 | 3.630009000000  |
| H | 0.809083000000  | 0.114851000000  | 2.920339000000  |
| H | -0.062513000000 | -1.436363000000 | 3.037825000000  |

Zero-point correction= 0.417184 (Hartree/Particle)  
 Thermal correction to Energy= 0.440648  
 Thermal correction to Enthalpy= 0.441592  
 Thermal correction to Gibbs Free Energy= 0.362480  
 Sum of electronic and zero-point Energies= -1164.896585  
 Sum of electronic and thermal Energies= -1164.873121  
 Sum of electronic and thermal Enthalpies= -1164.872177  
 Sum of electronic and thermal Free Energies= -1164.951289  
 E(RM06L) = -1166.02062986

## 10. NMR spectra

### 1-methyl-2-phenyl-1H-indole (3a)

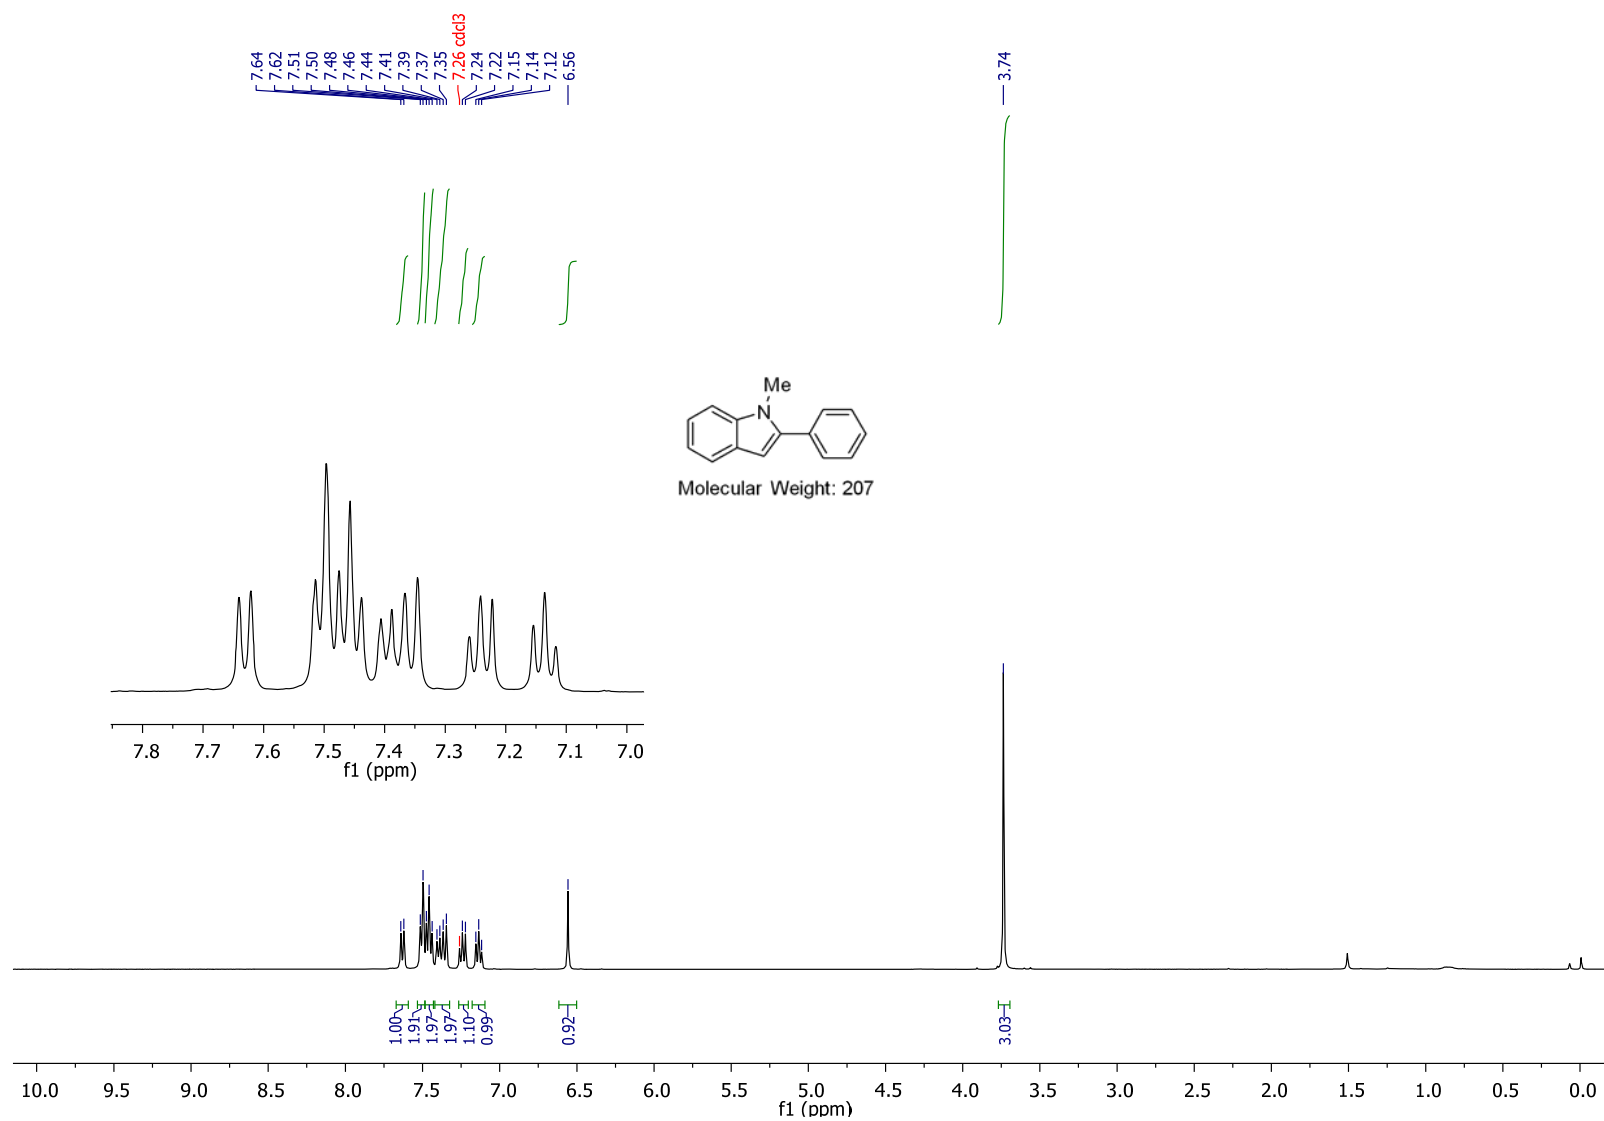

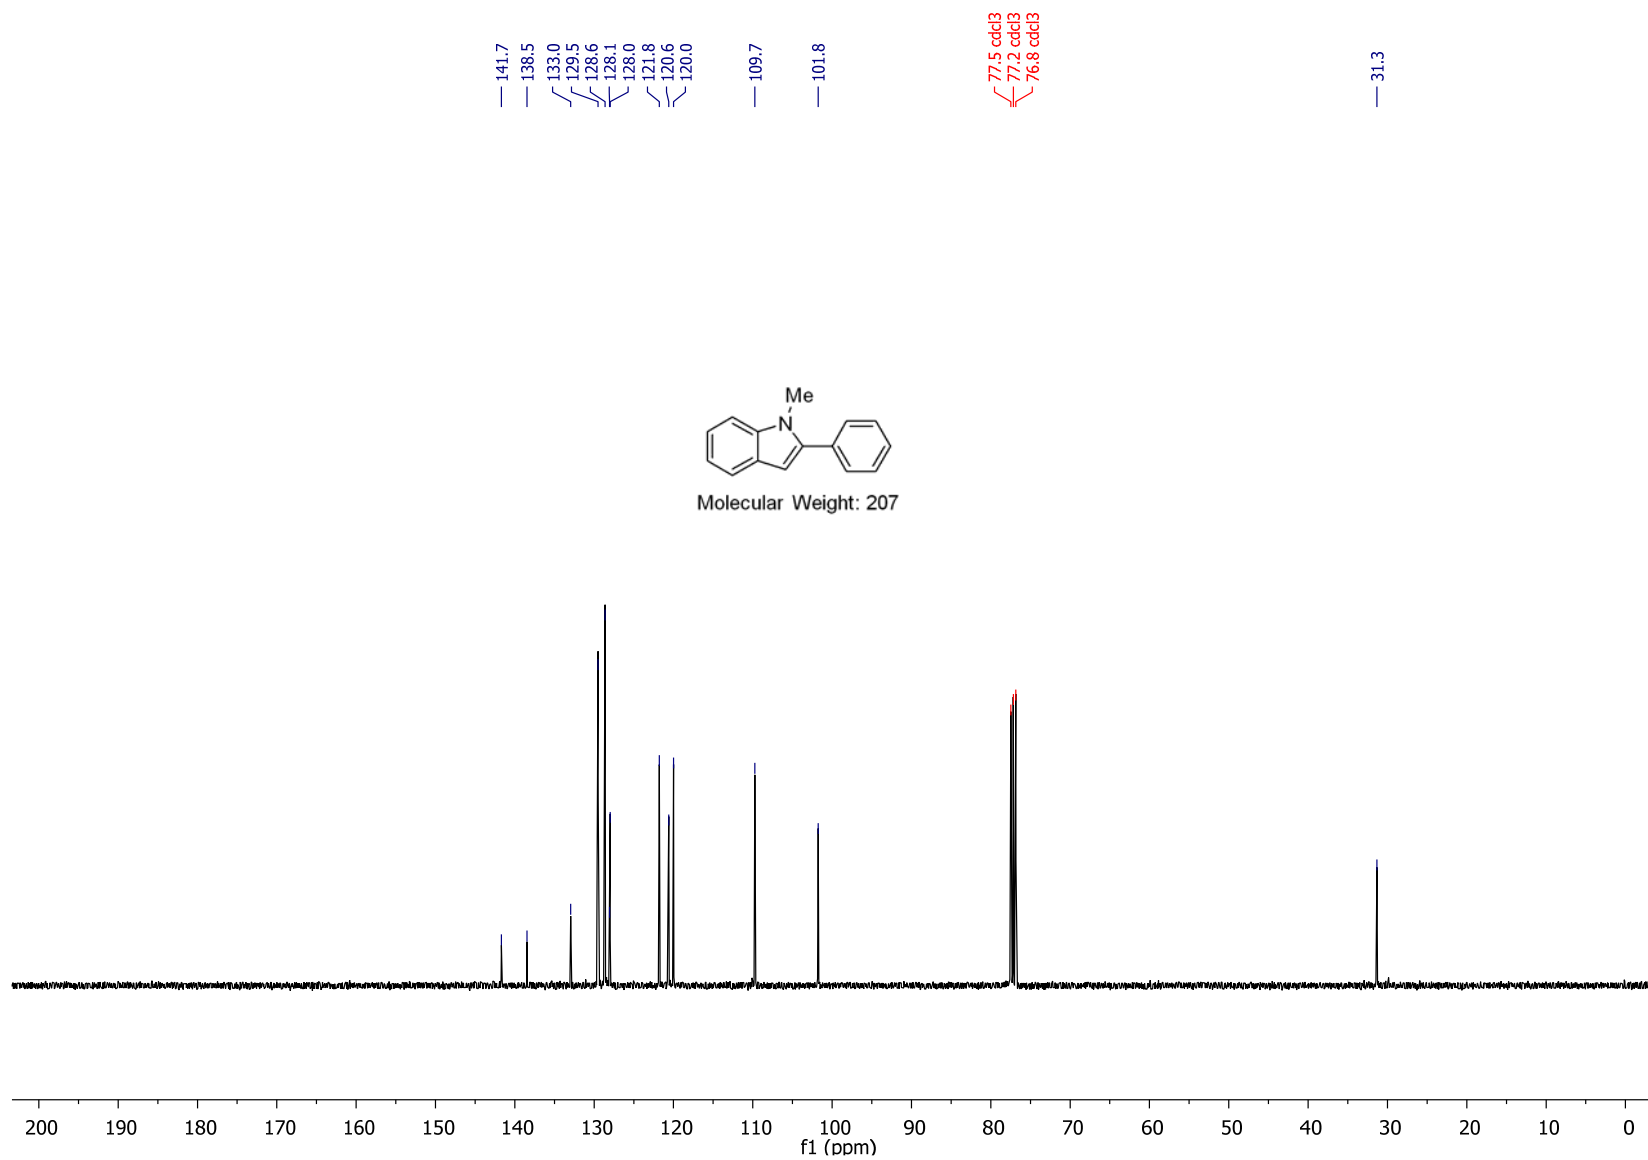

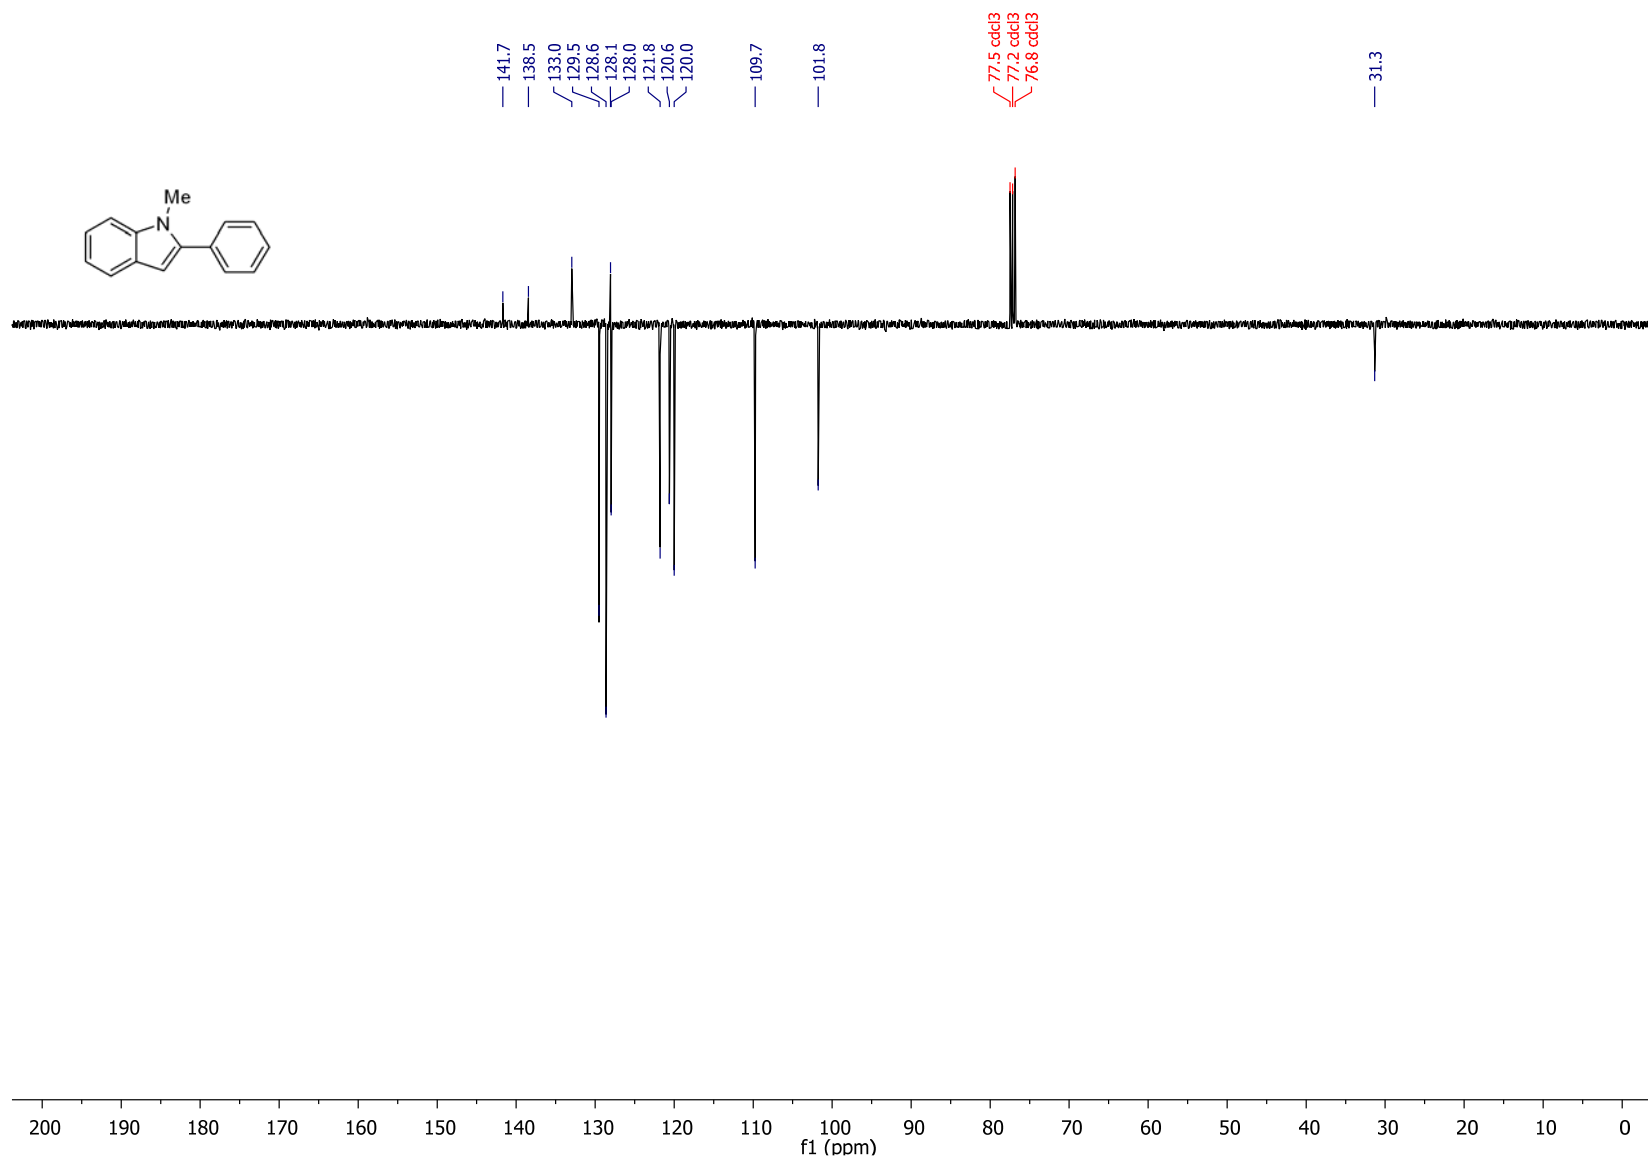

1,3-dimethyl-2-phenyl-1H-indole (3b)

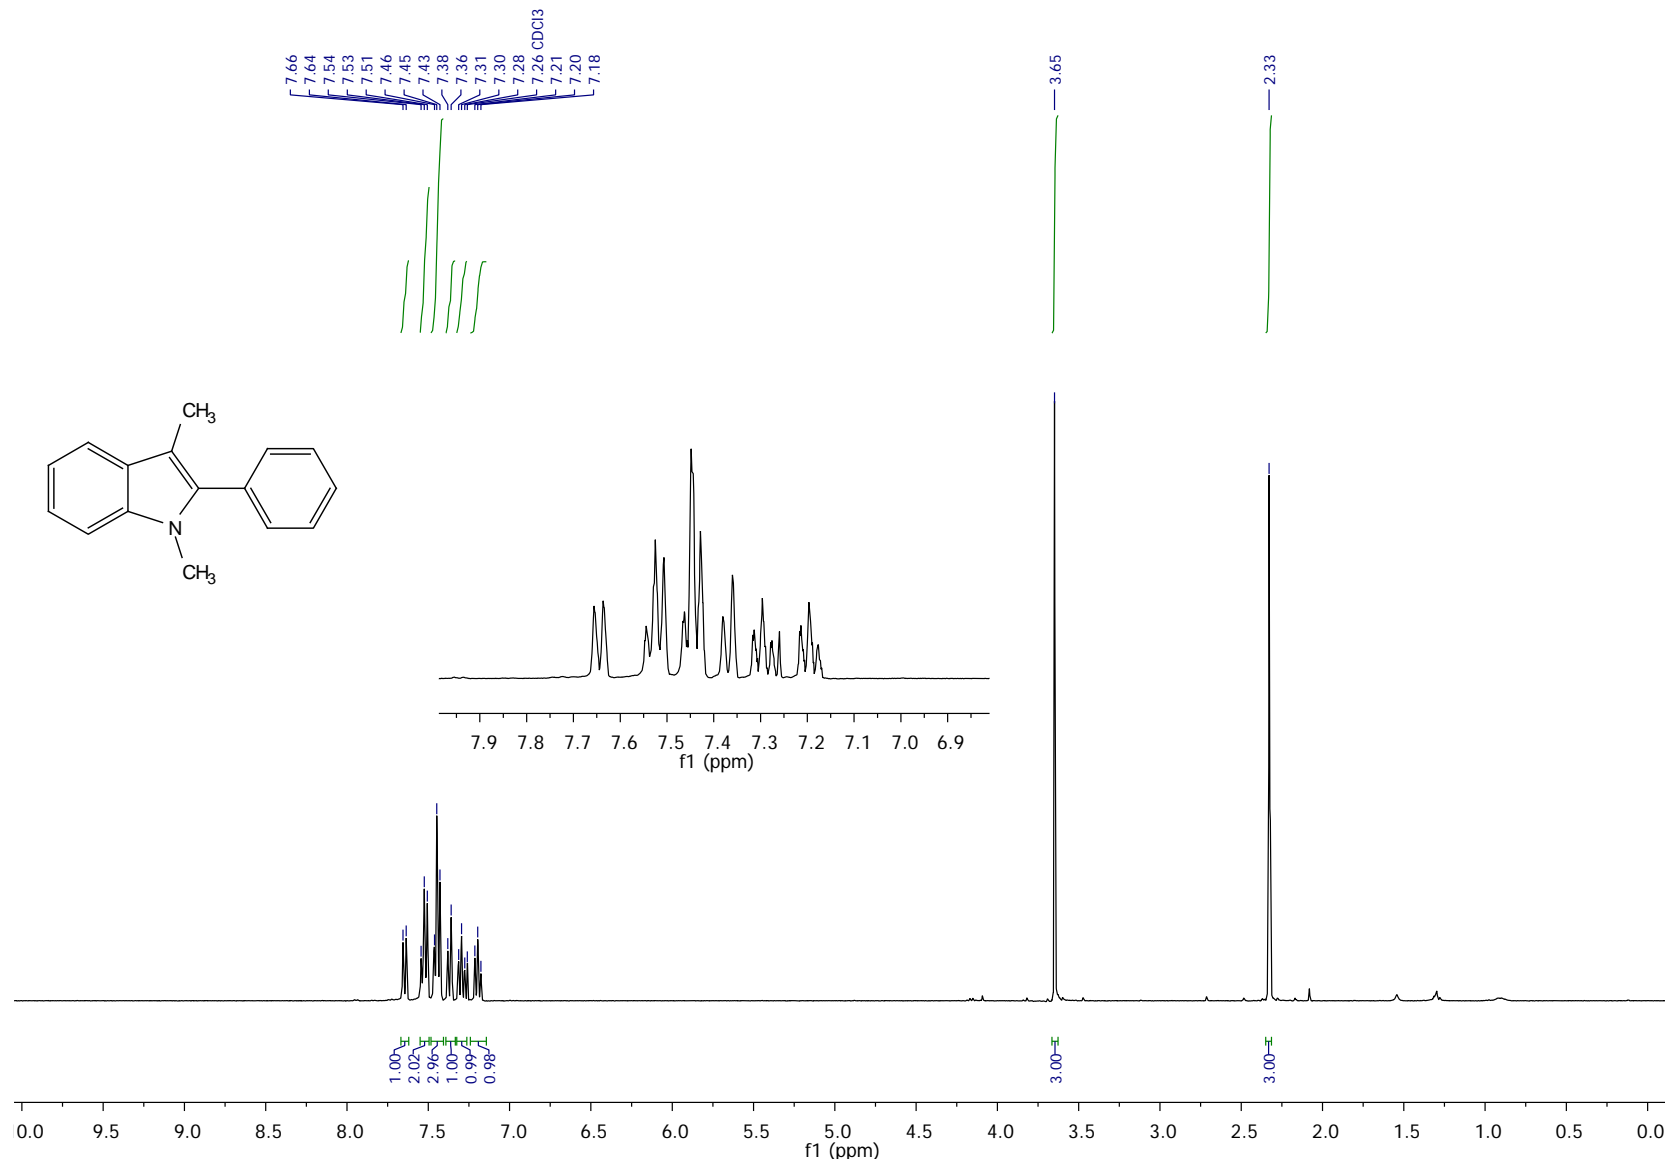

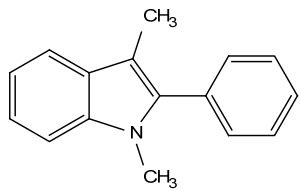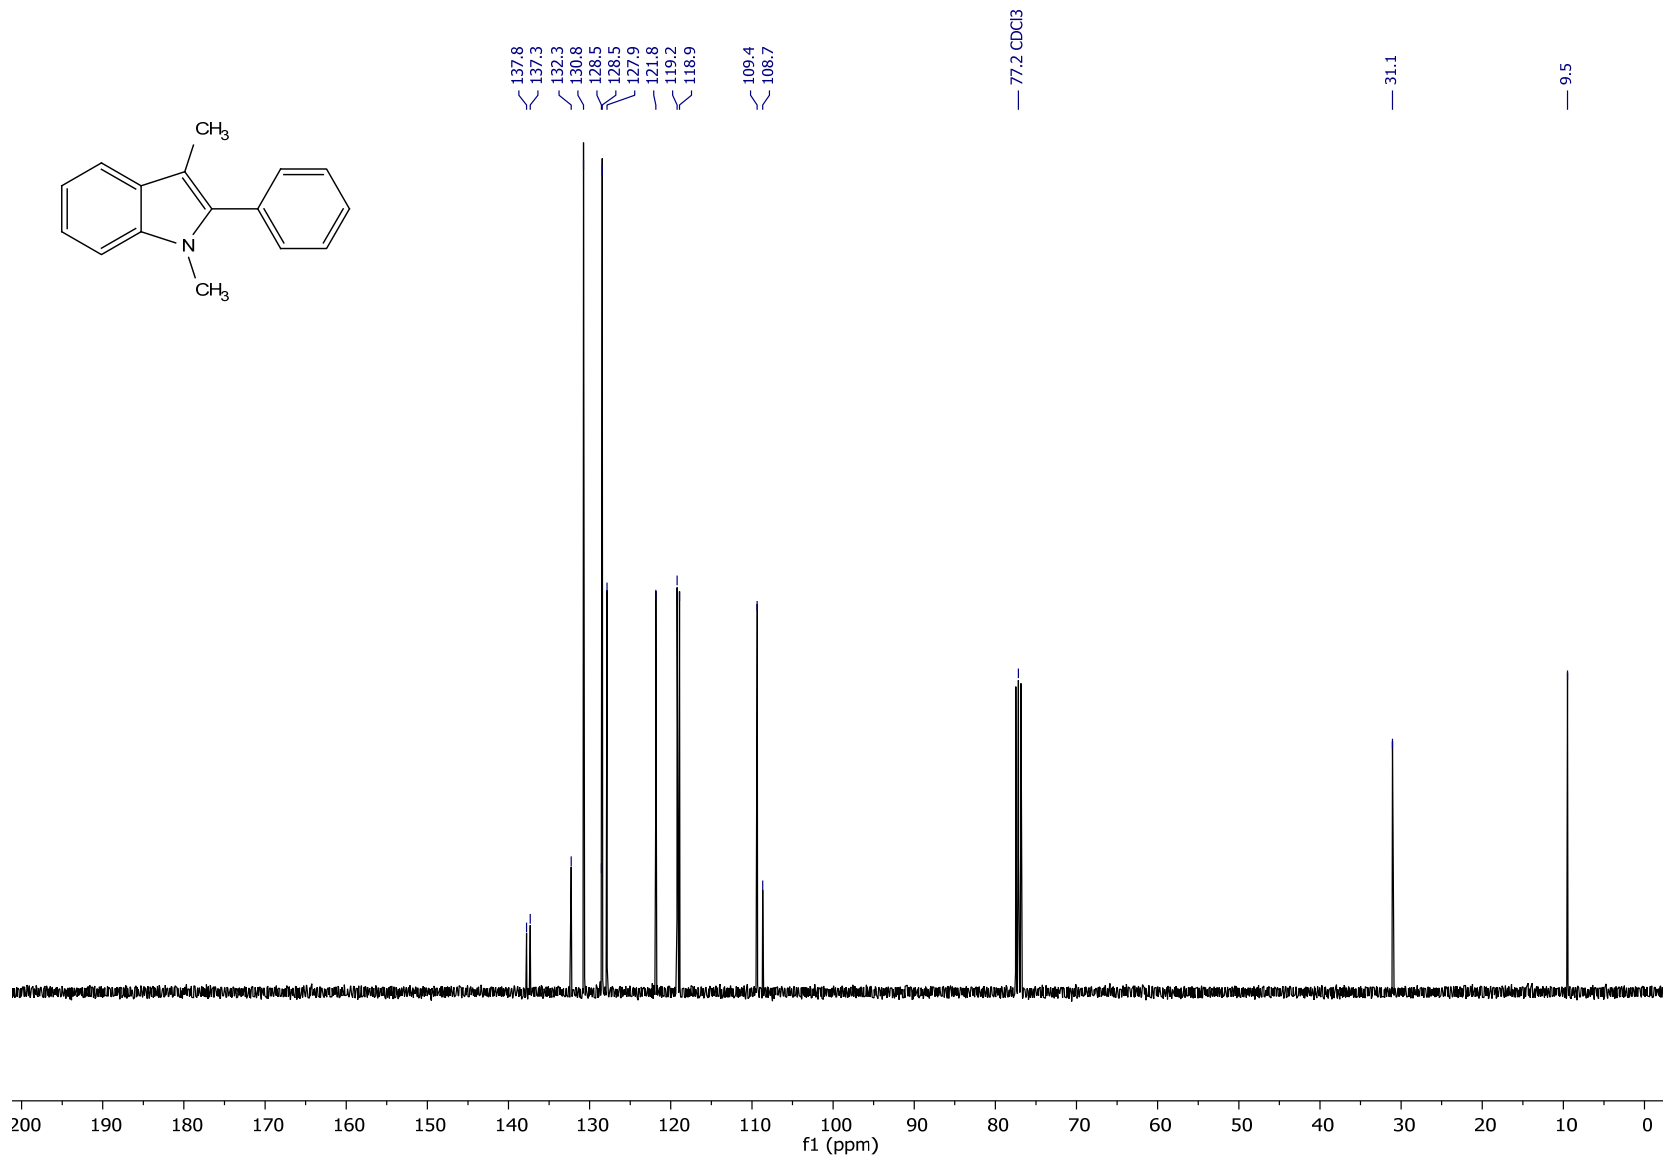

1-methyl-2-(2-methylphenyl)-1H-indole (3c)

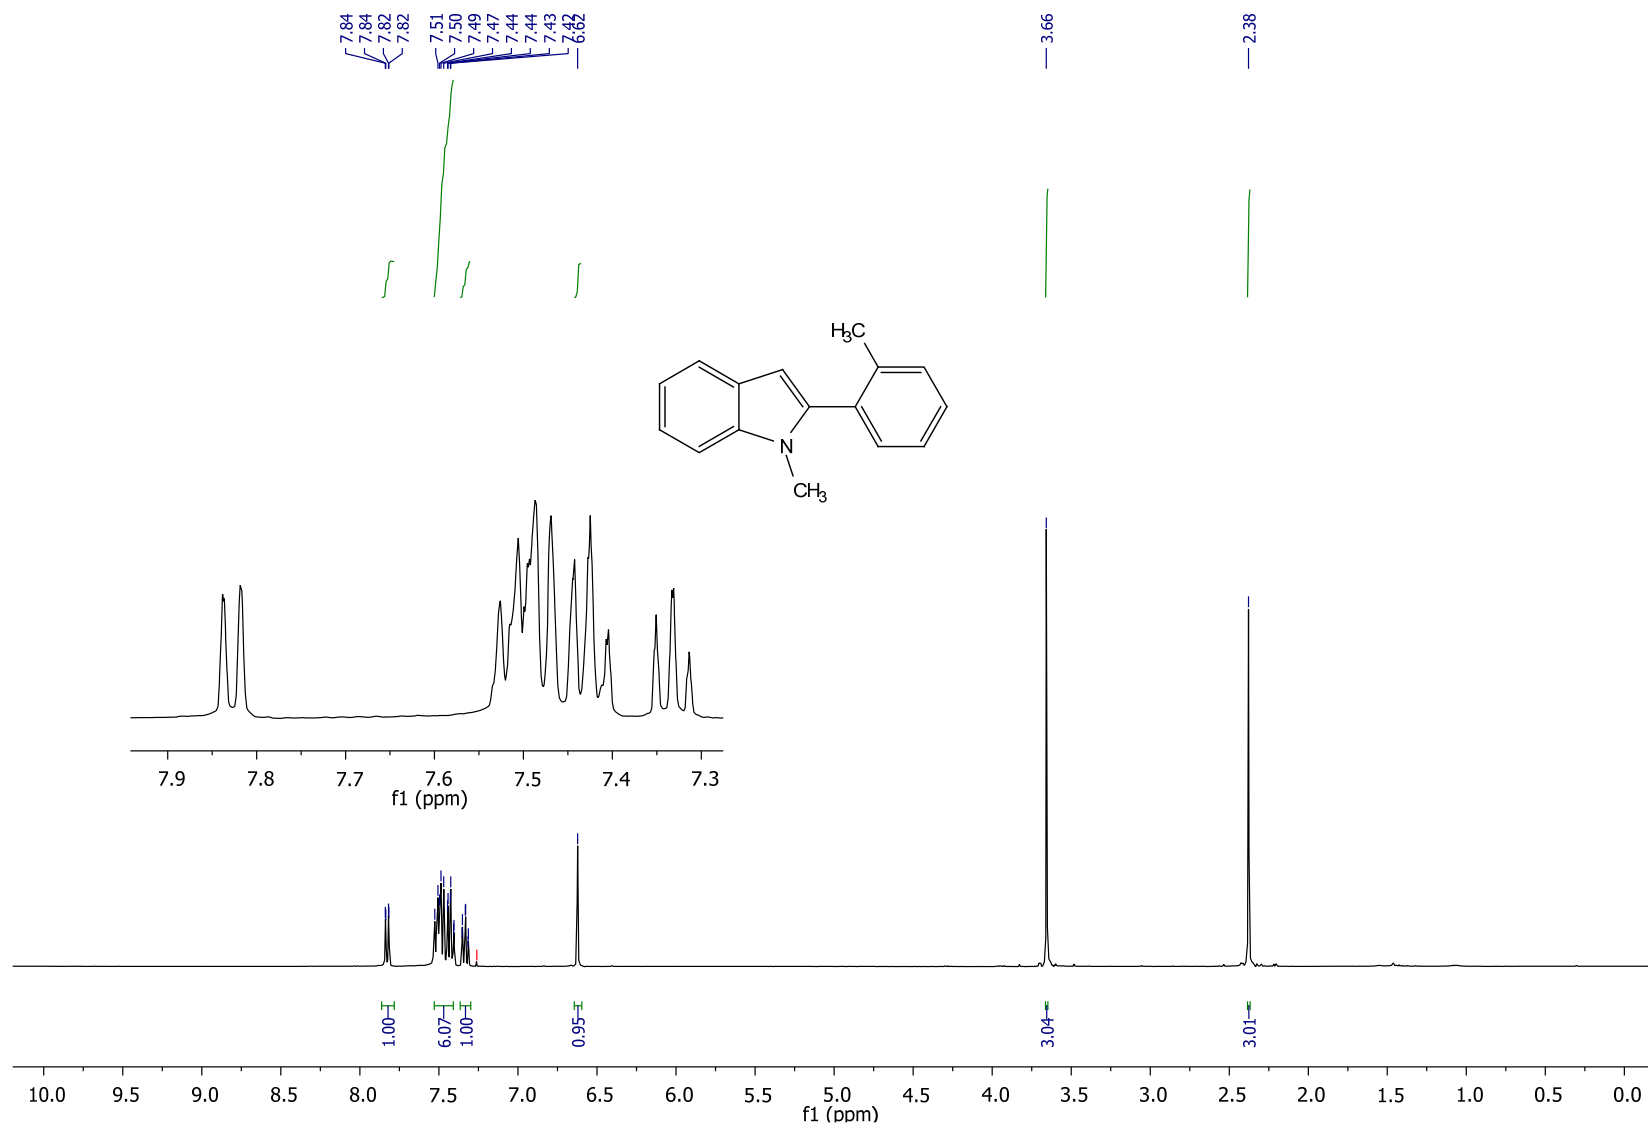



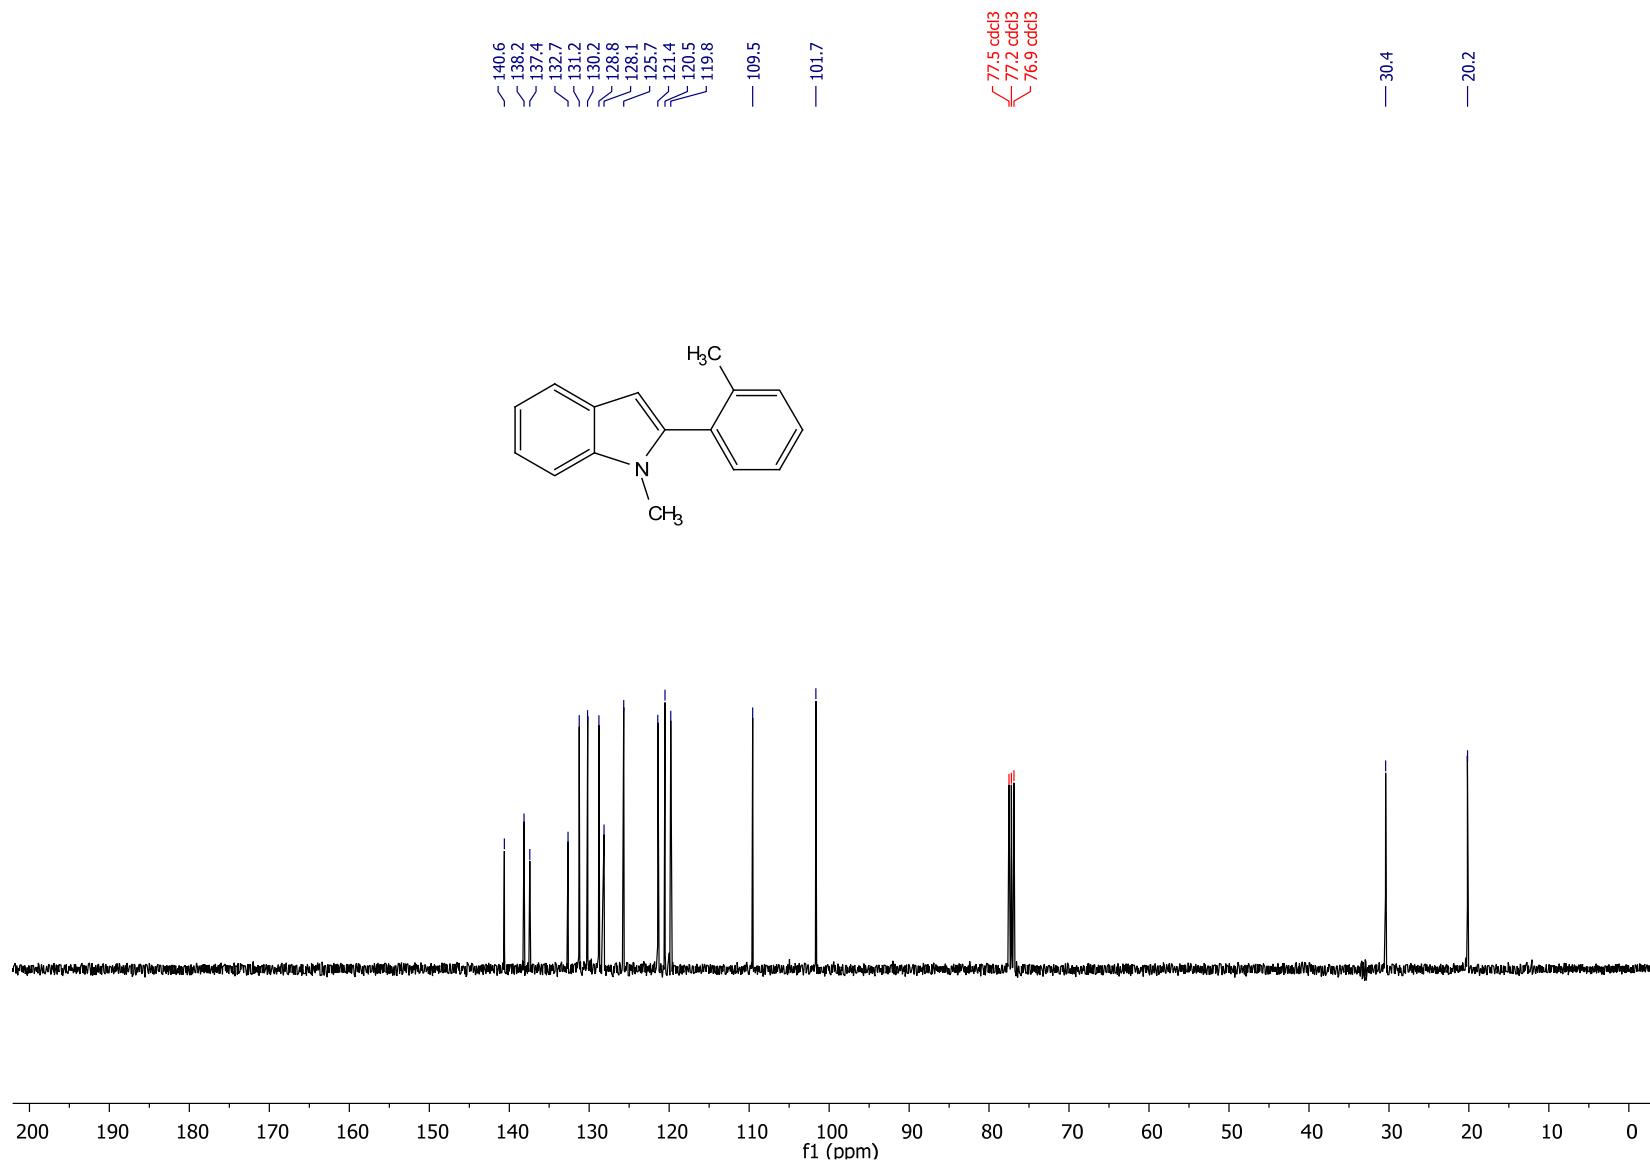

1-methyl-2-(*p*-tolyl)-1*H*-indole (3d)

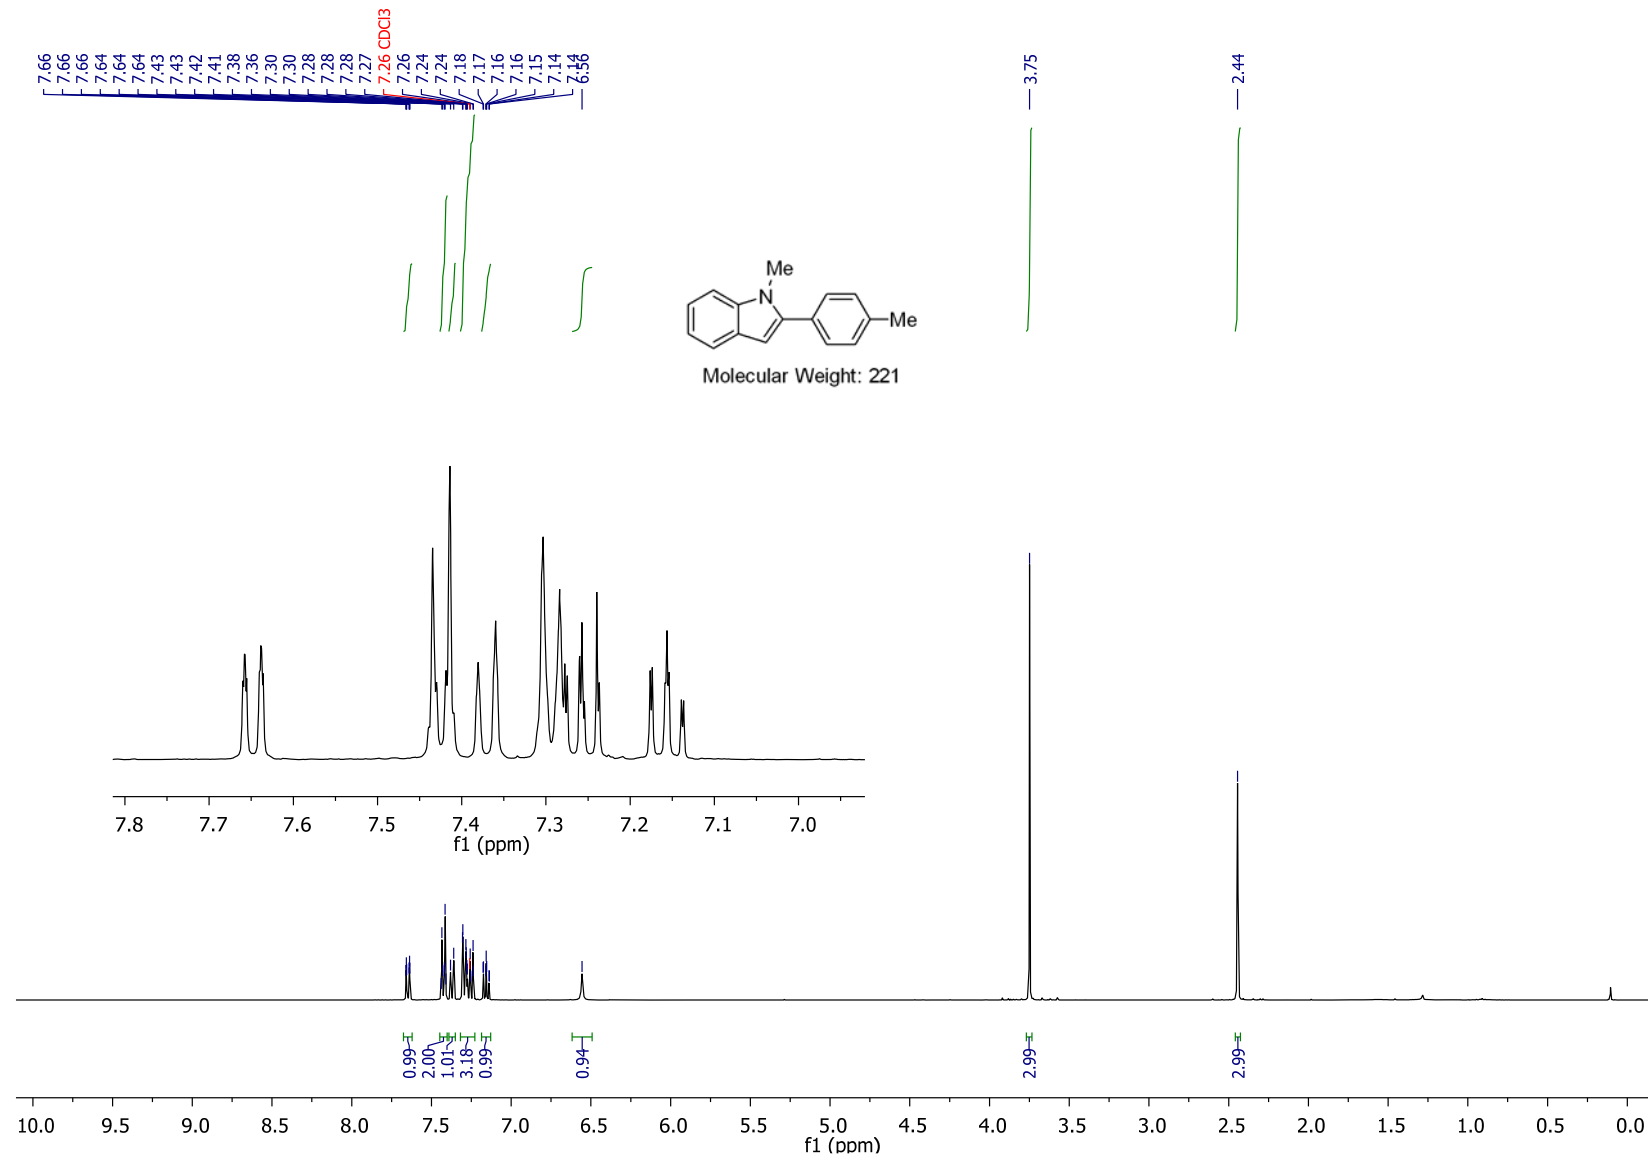

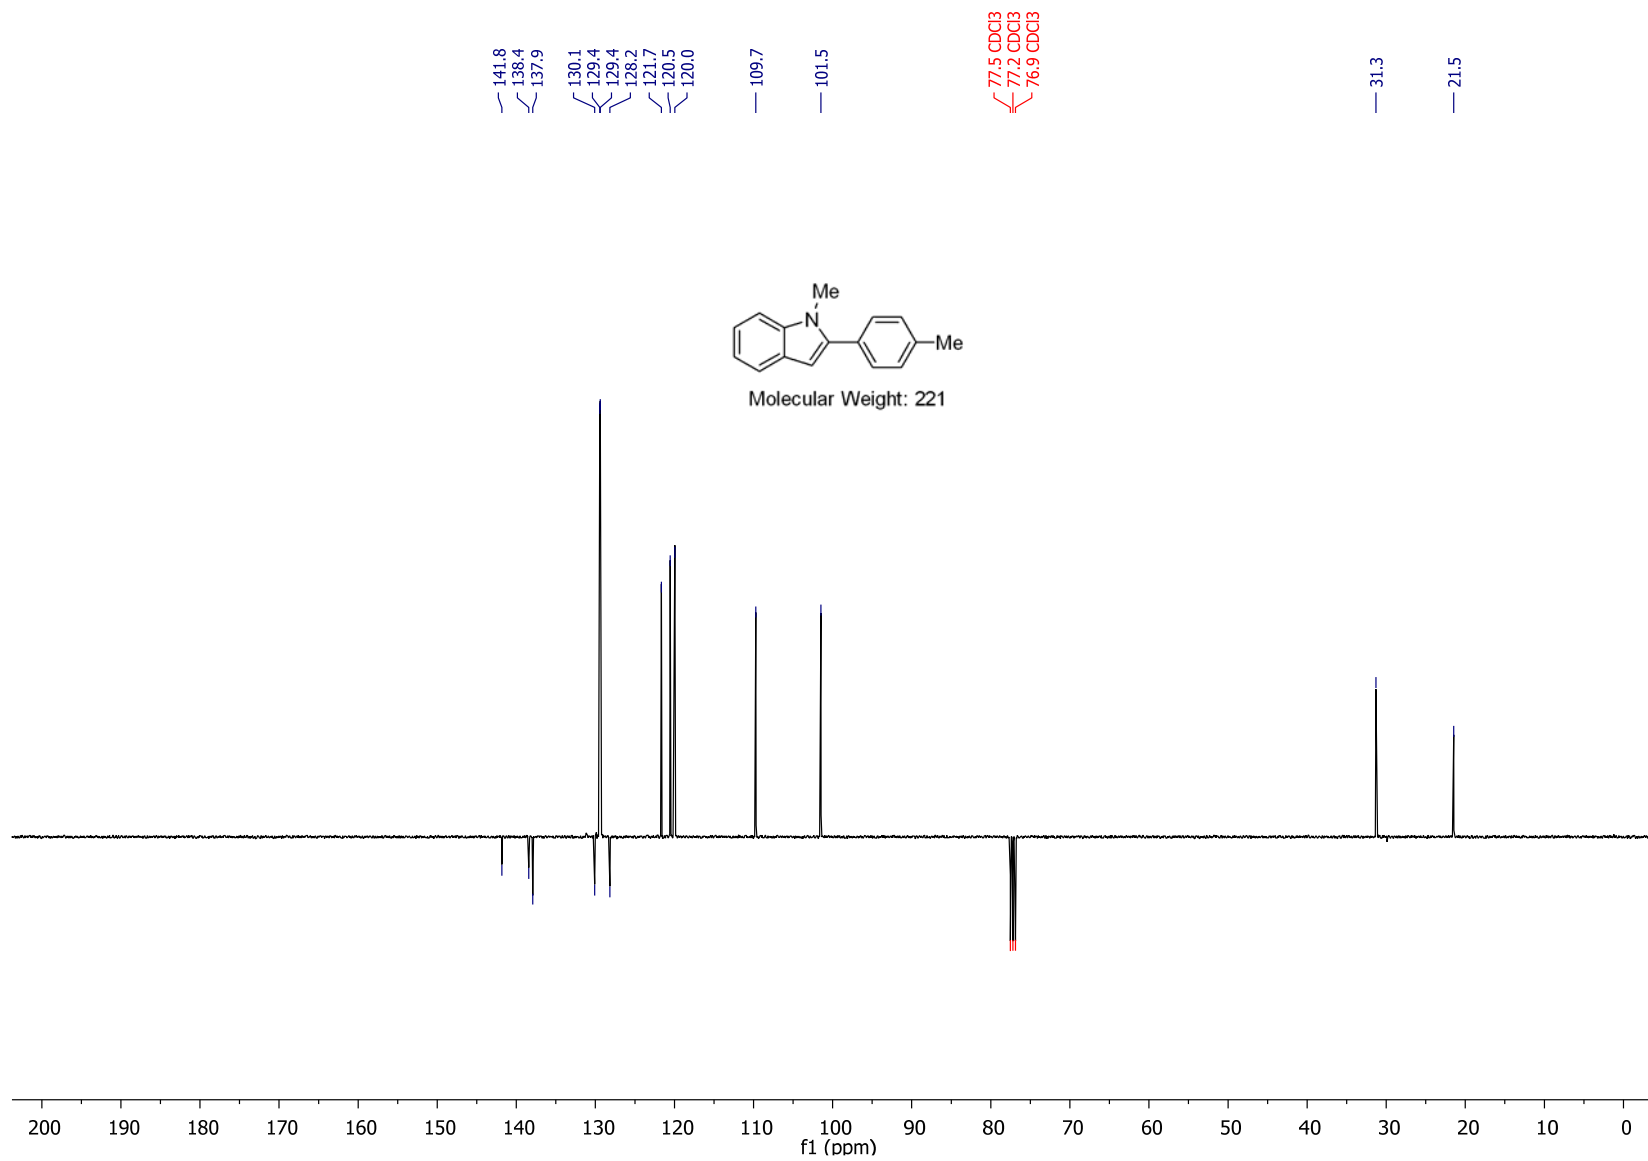

2-(2',4'-dimethylphenyl)-1-methyl-1H-indole (3e)

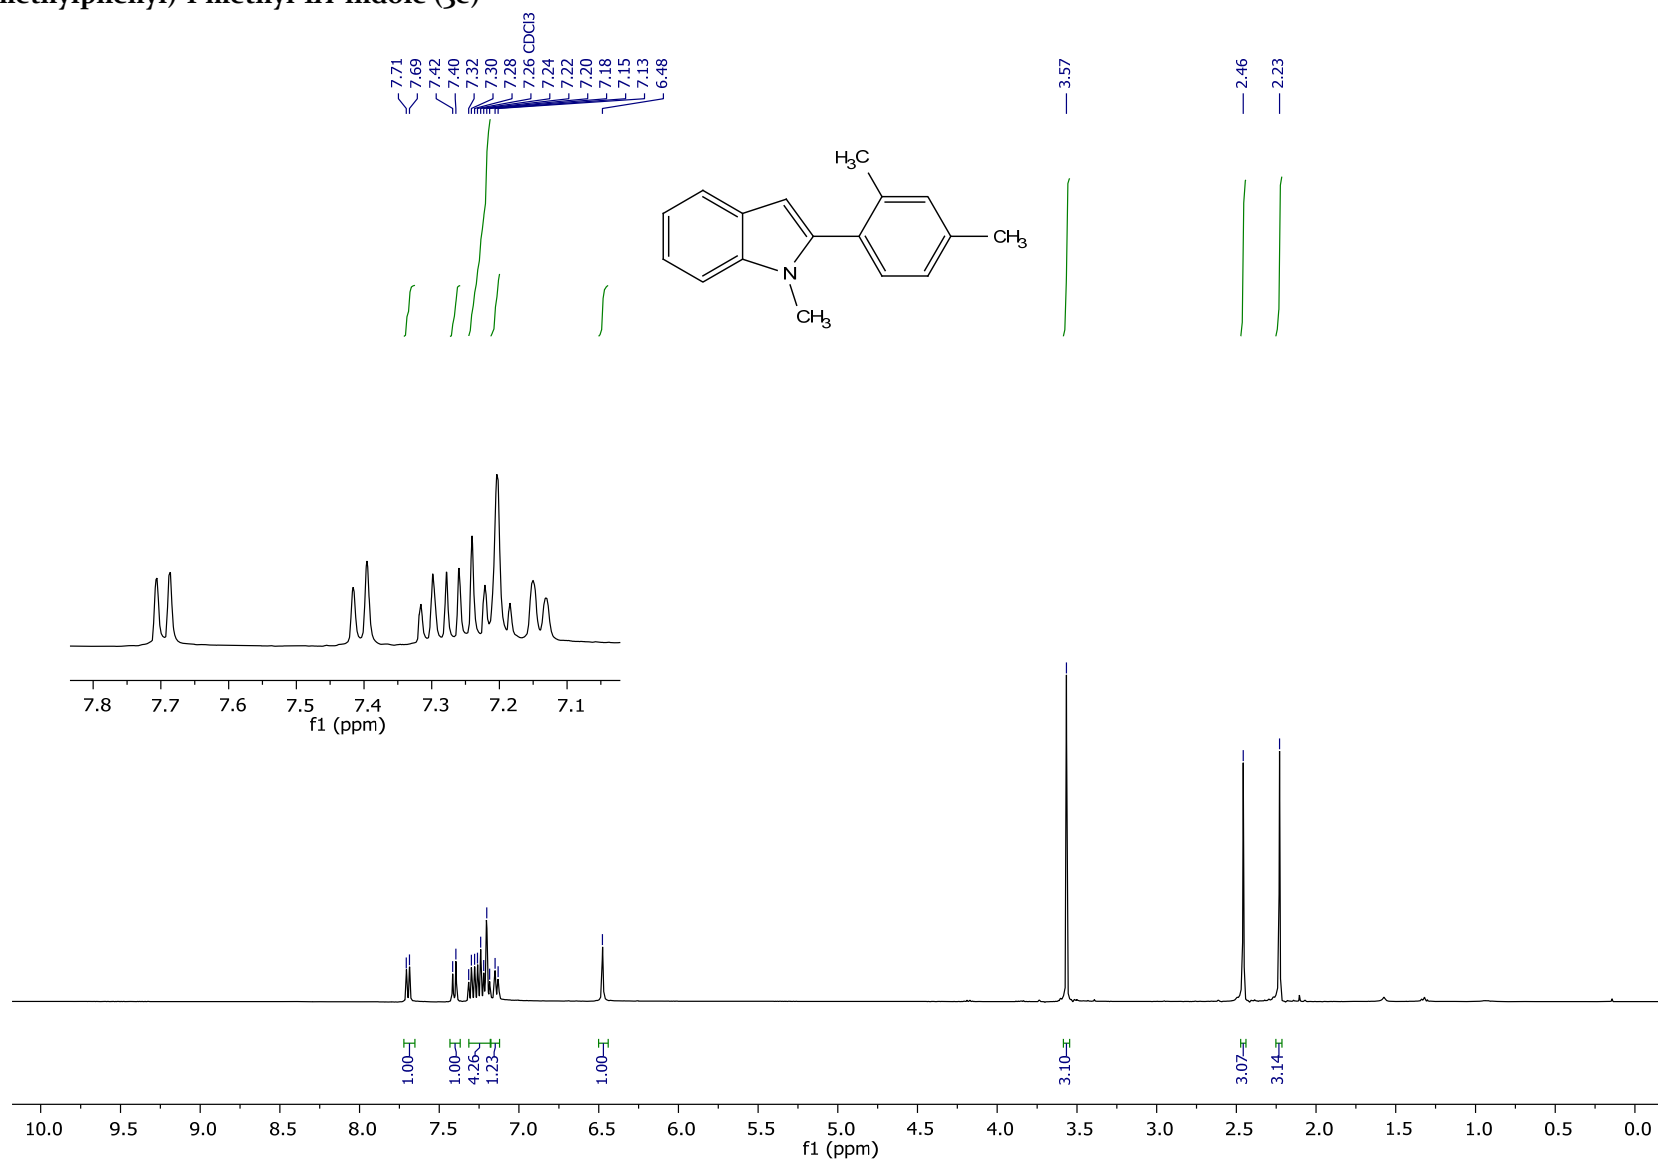

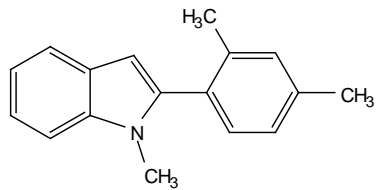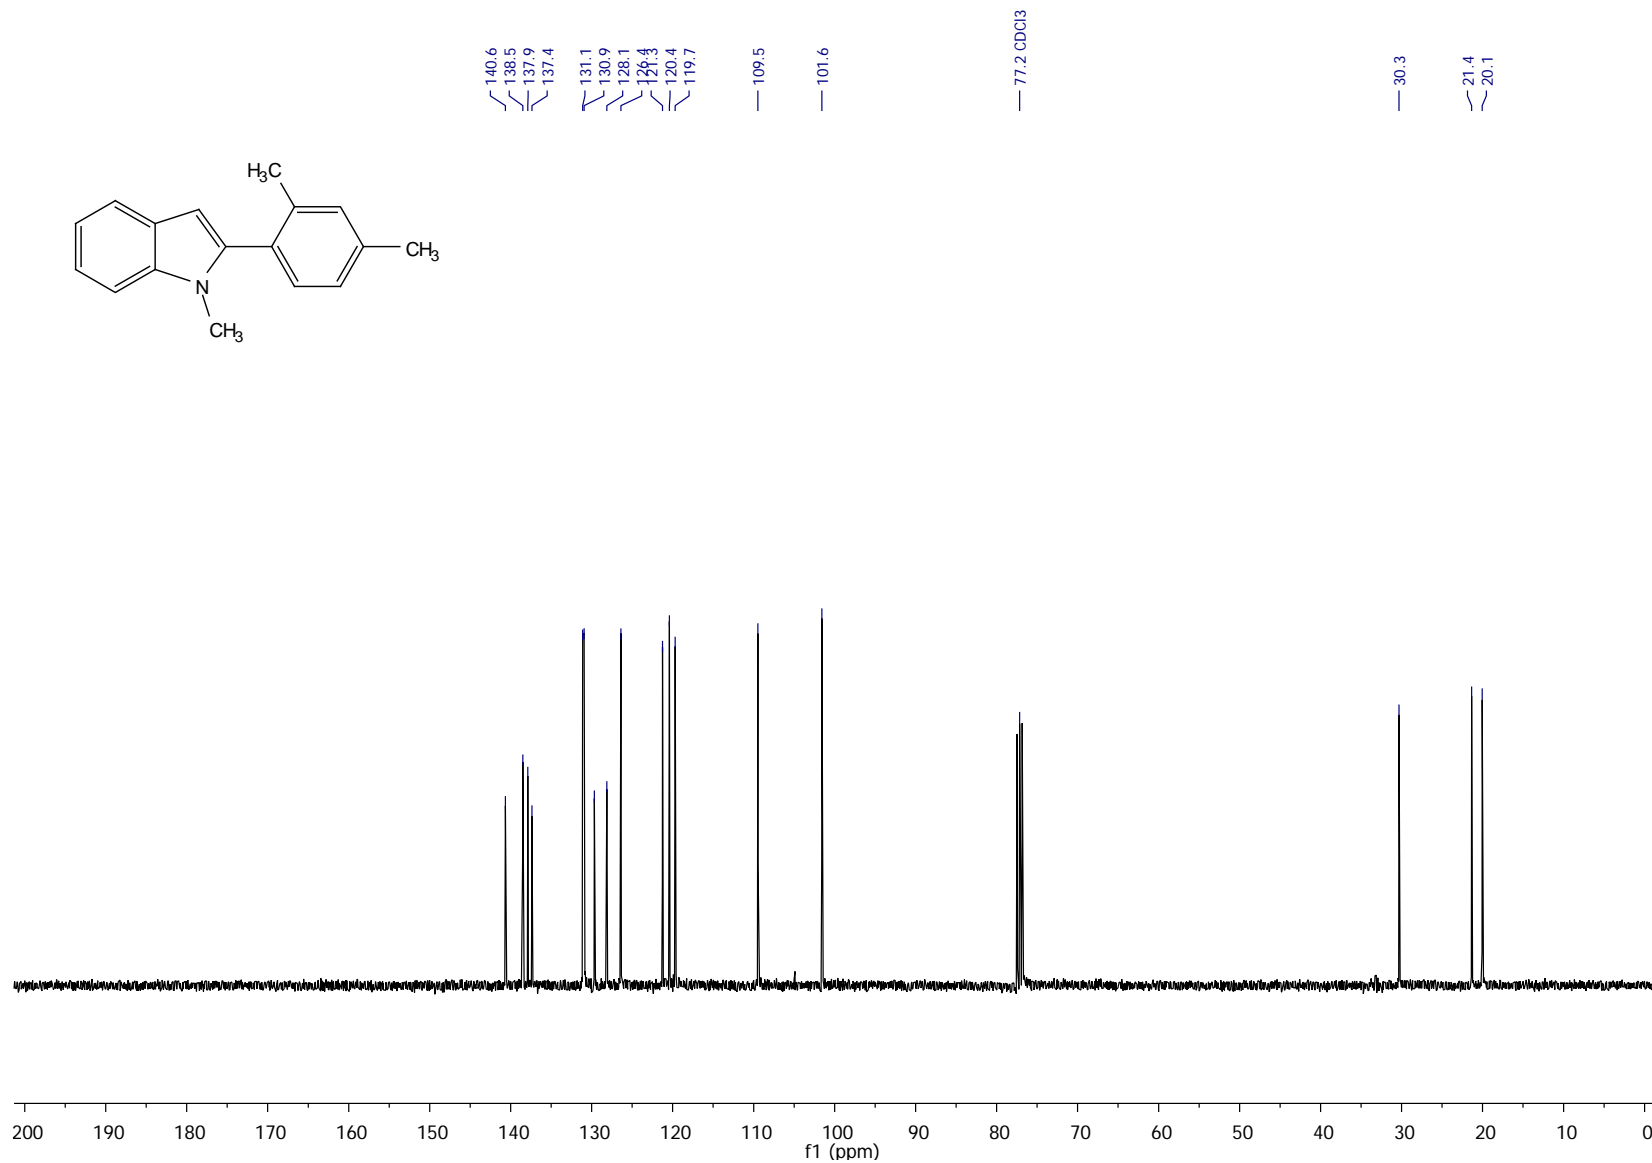

2-mesityl-1-methyl-1H-indole (3f - C-2)

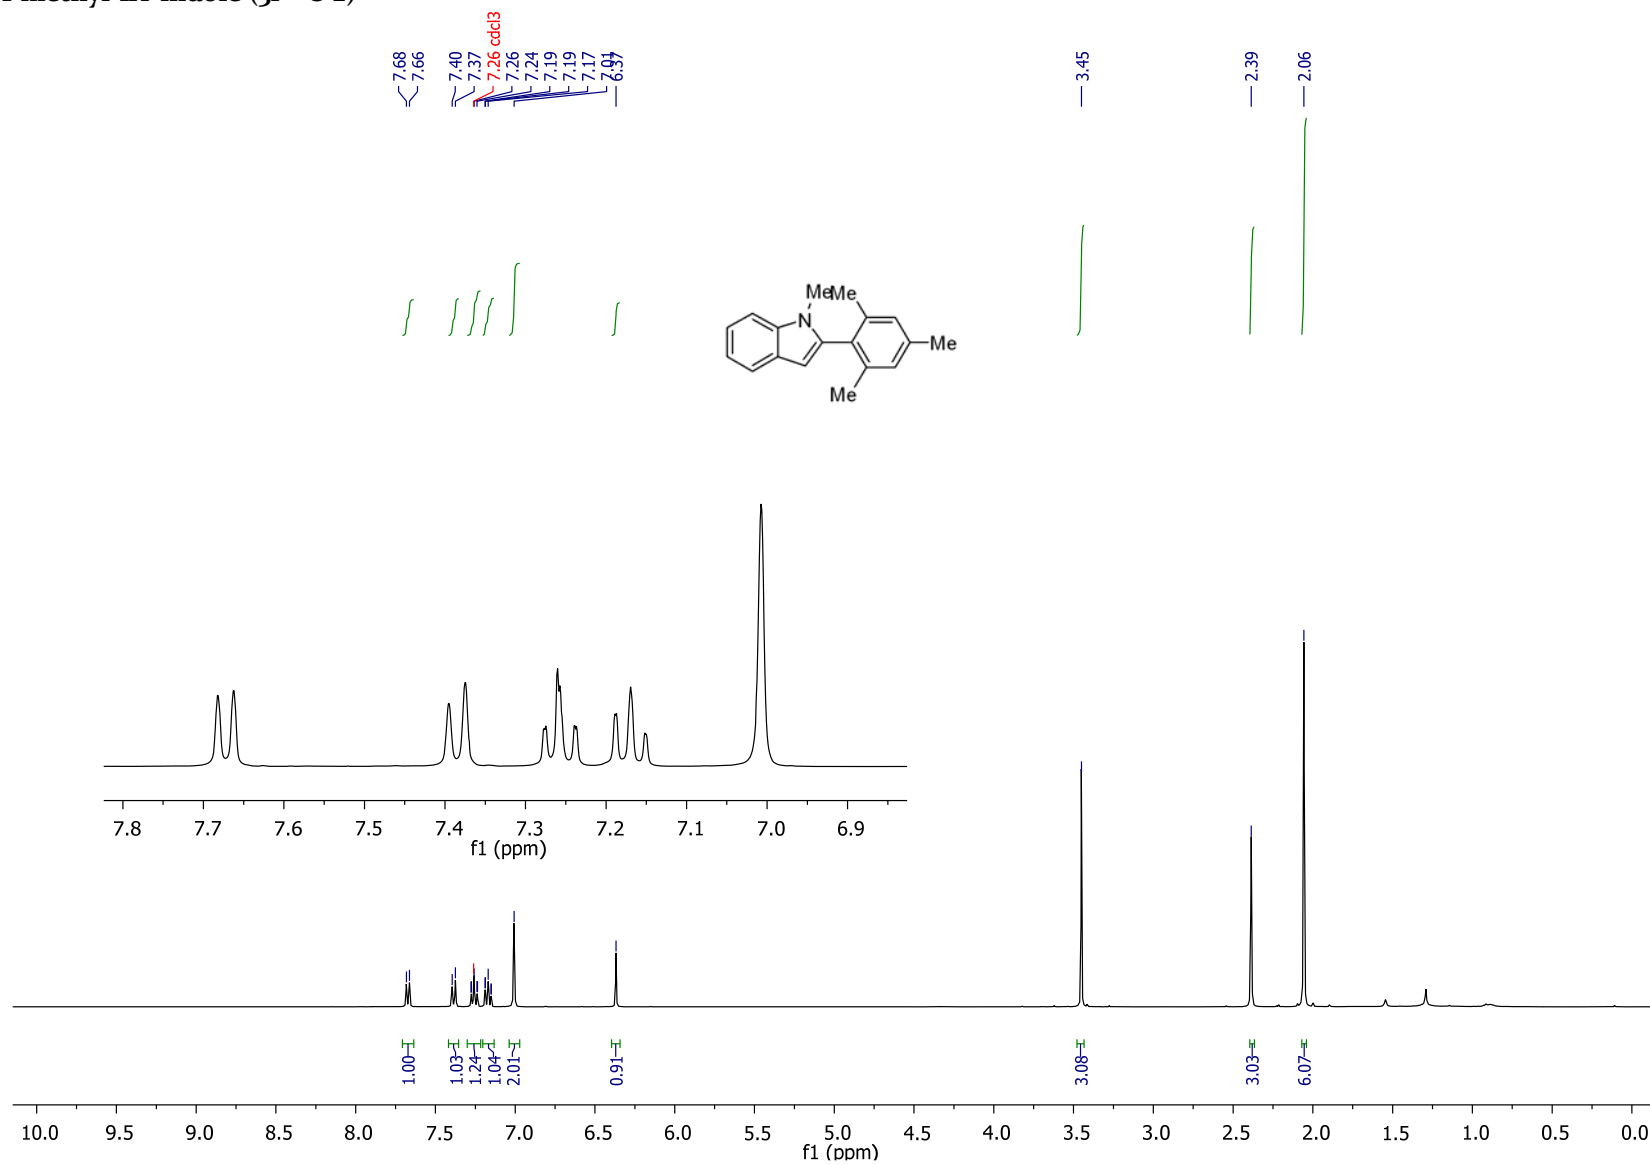

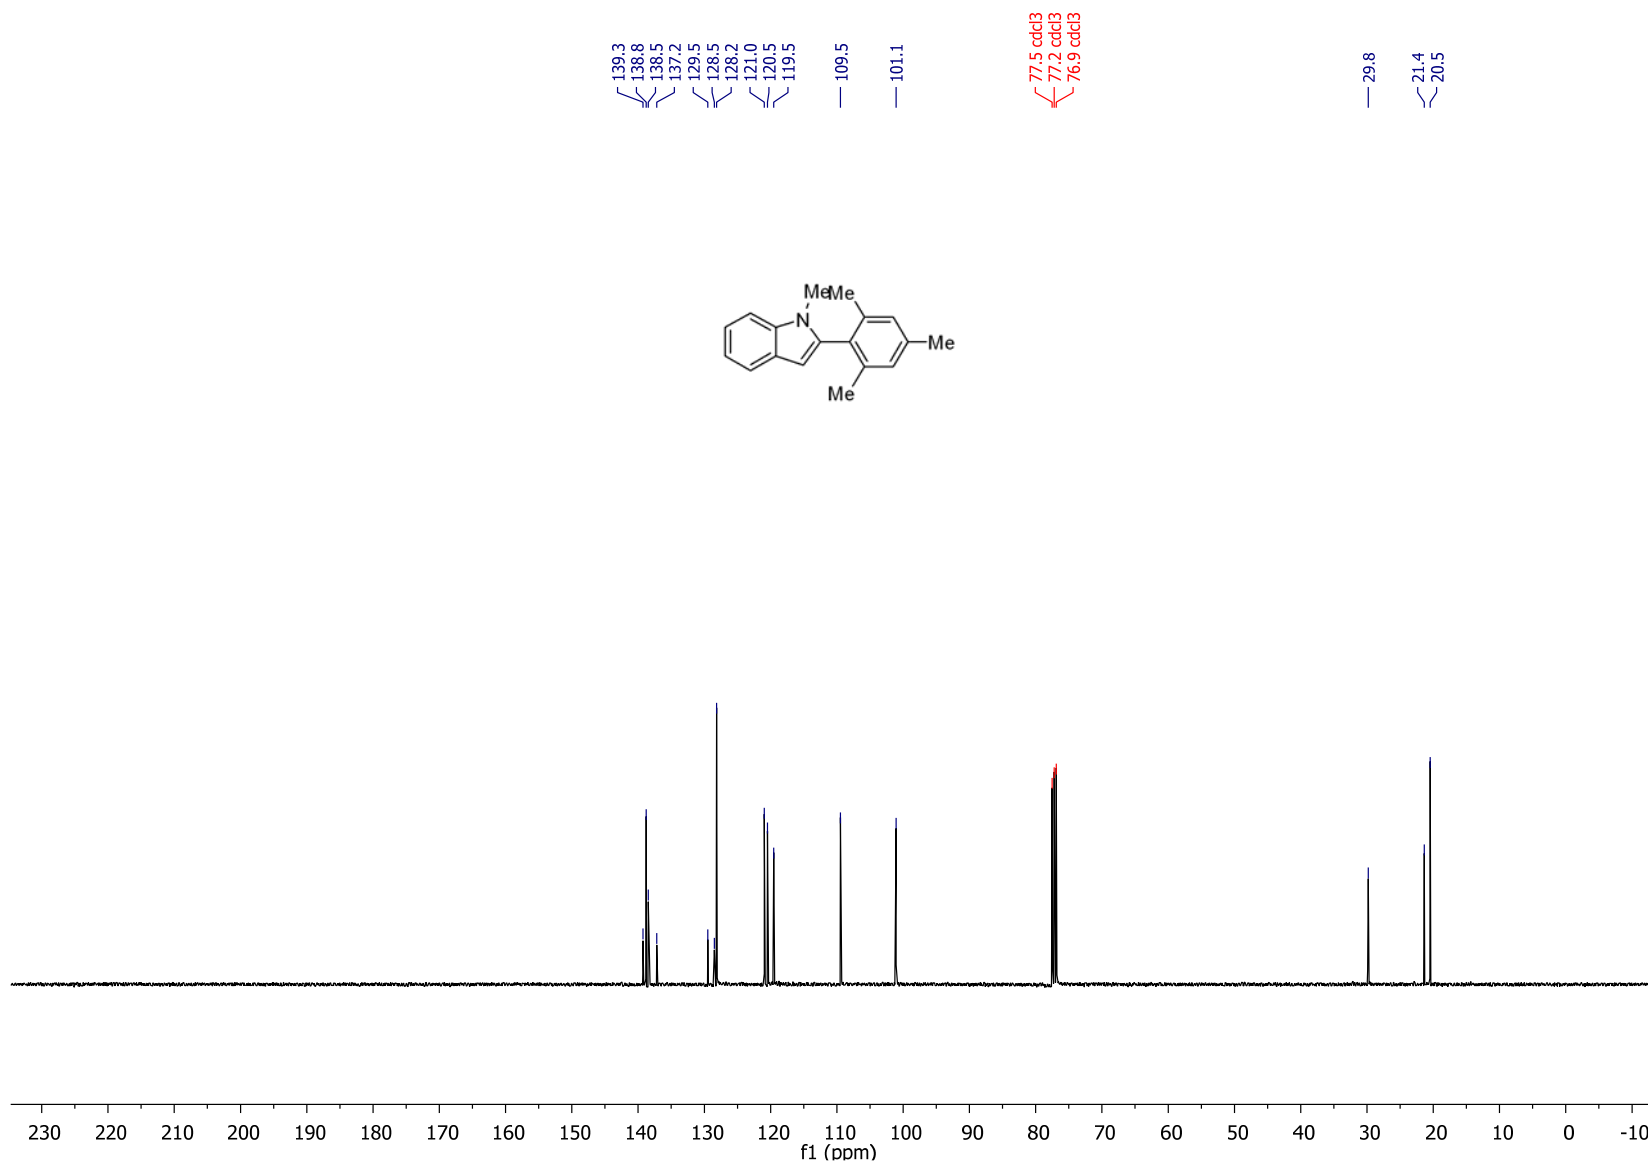

3-mesityl-1-methyl-1H-indole (3f - C-3)

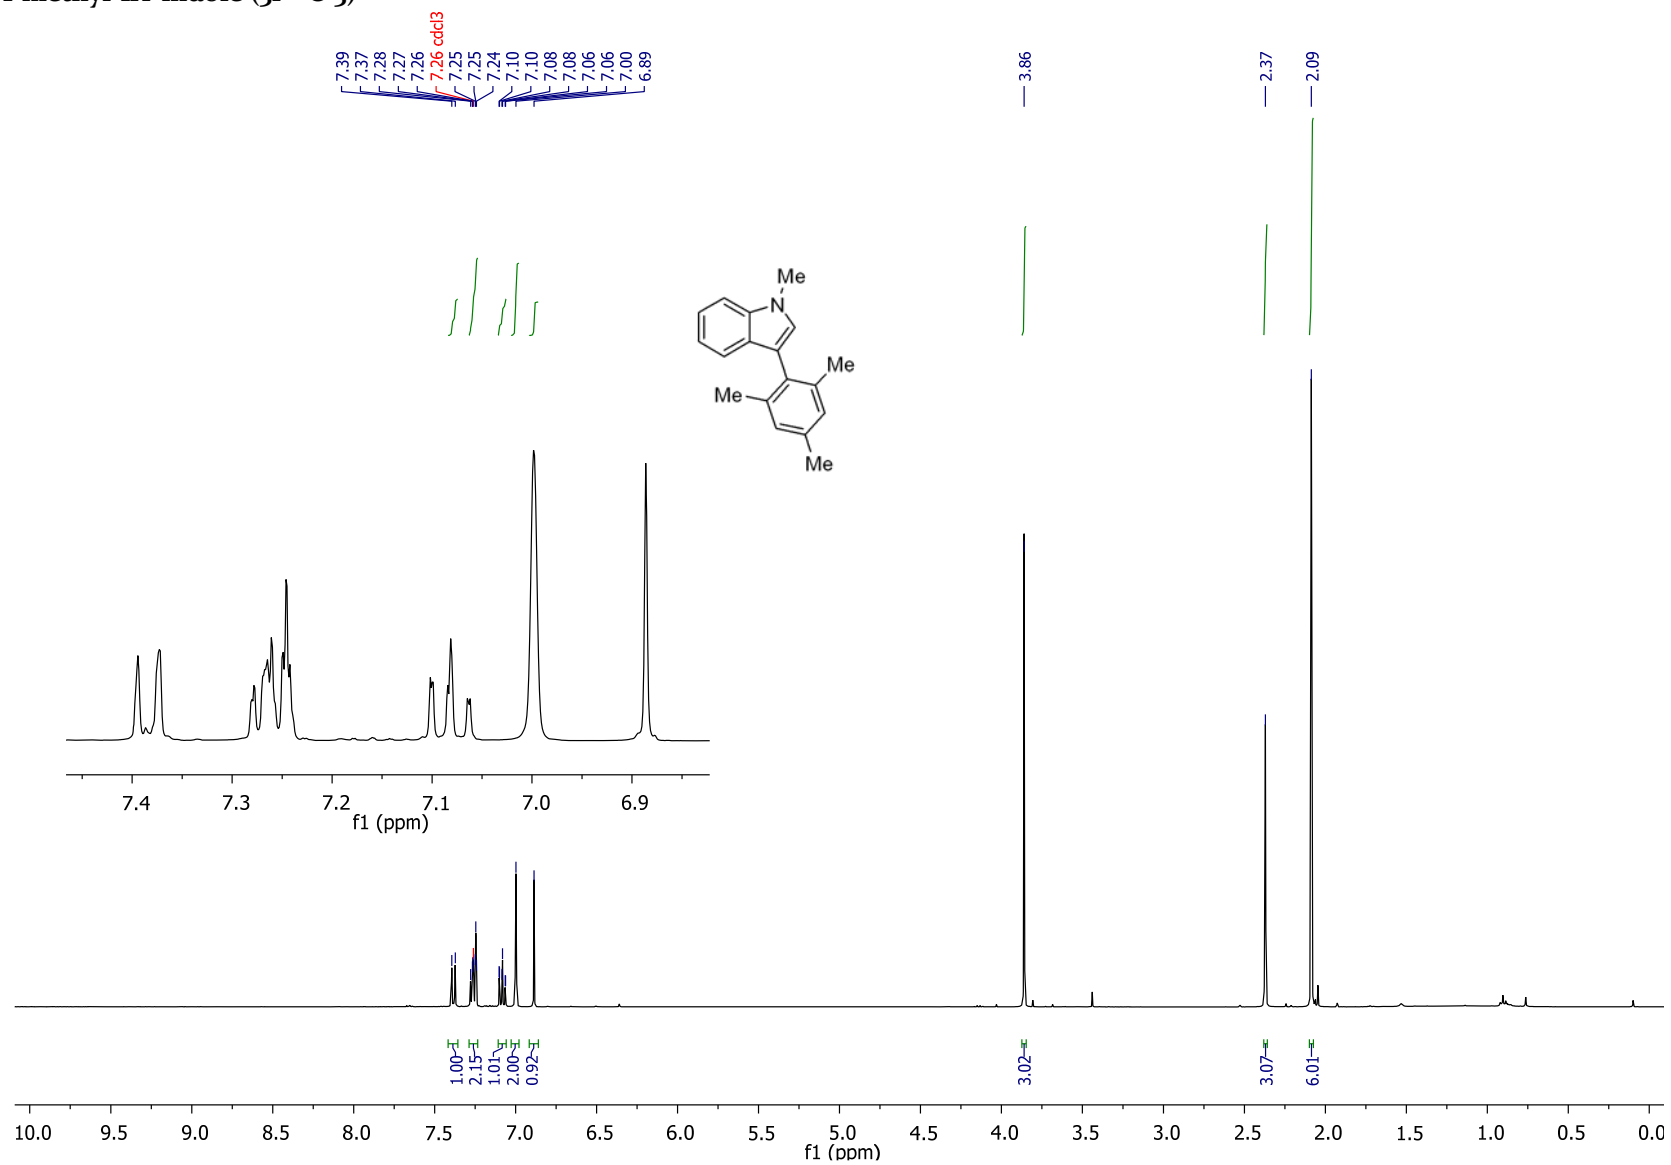



138.6  
137.0  
136.5  
131.2  
128.1  
128.0  
127.3  
121.6  
120.2  
119.2  
114.4  
109.3

77.5 cdCl3  
77.2 cdCl3  
76.9 cdCl3

33.0  
29.9  
21.3  
21.1

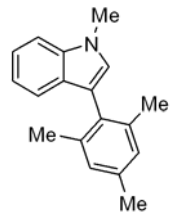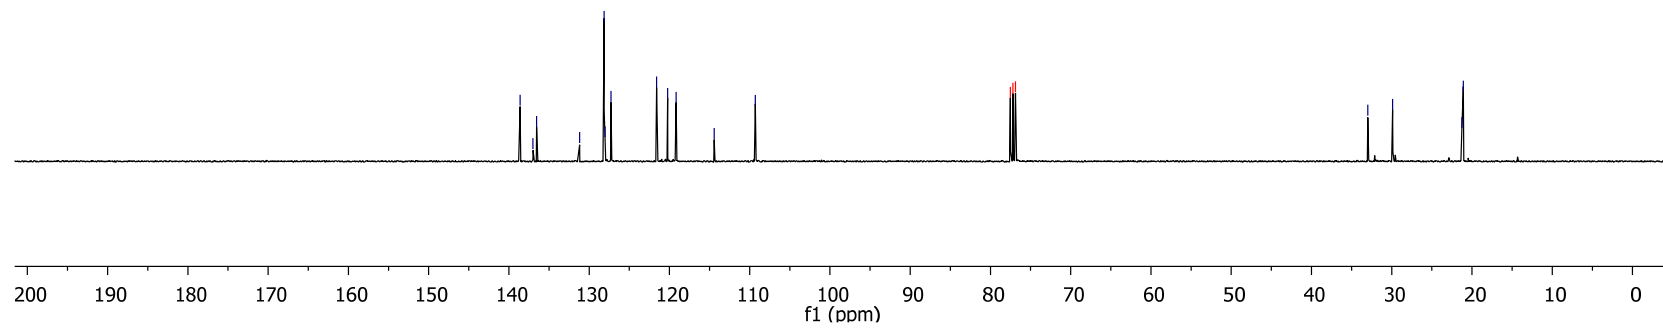

2-(4-(*tert*-butyl)phenyl)-1-methyl-1*H*-indole (3g)

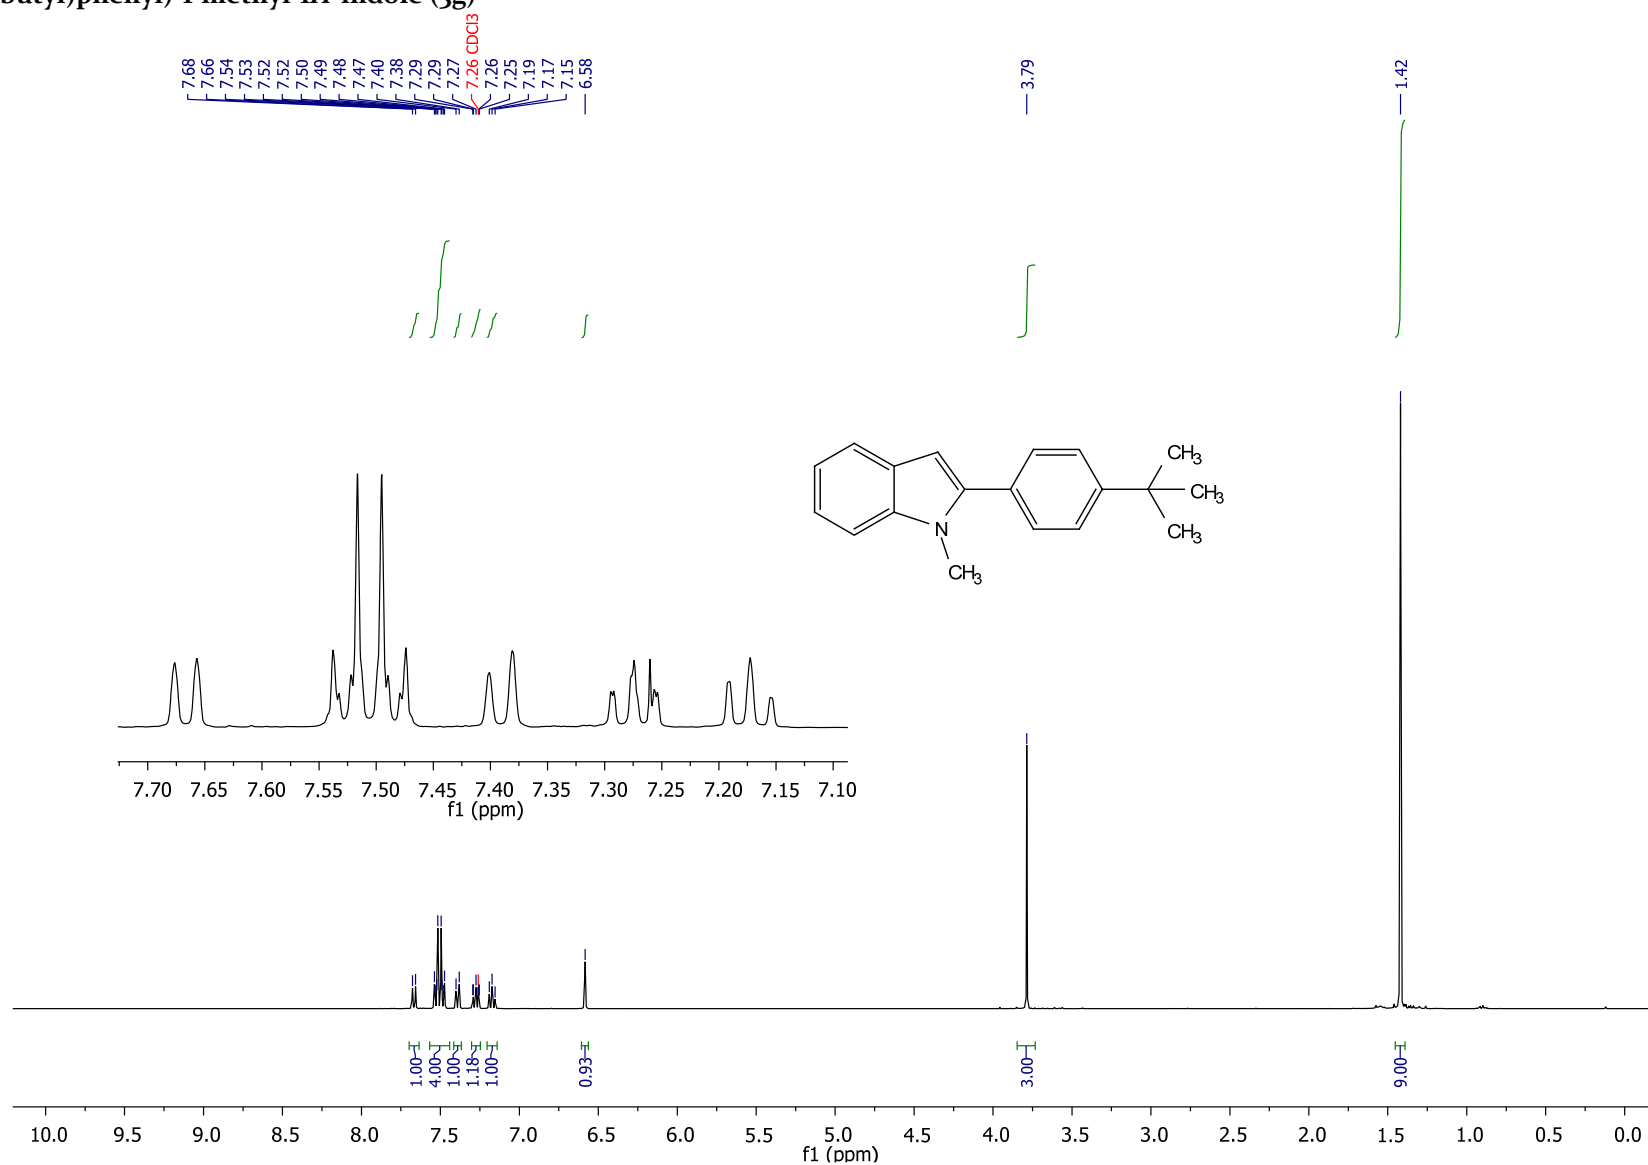

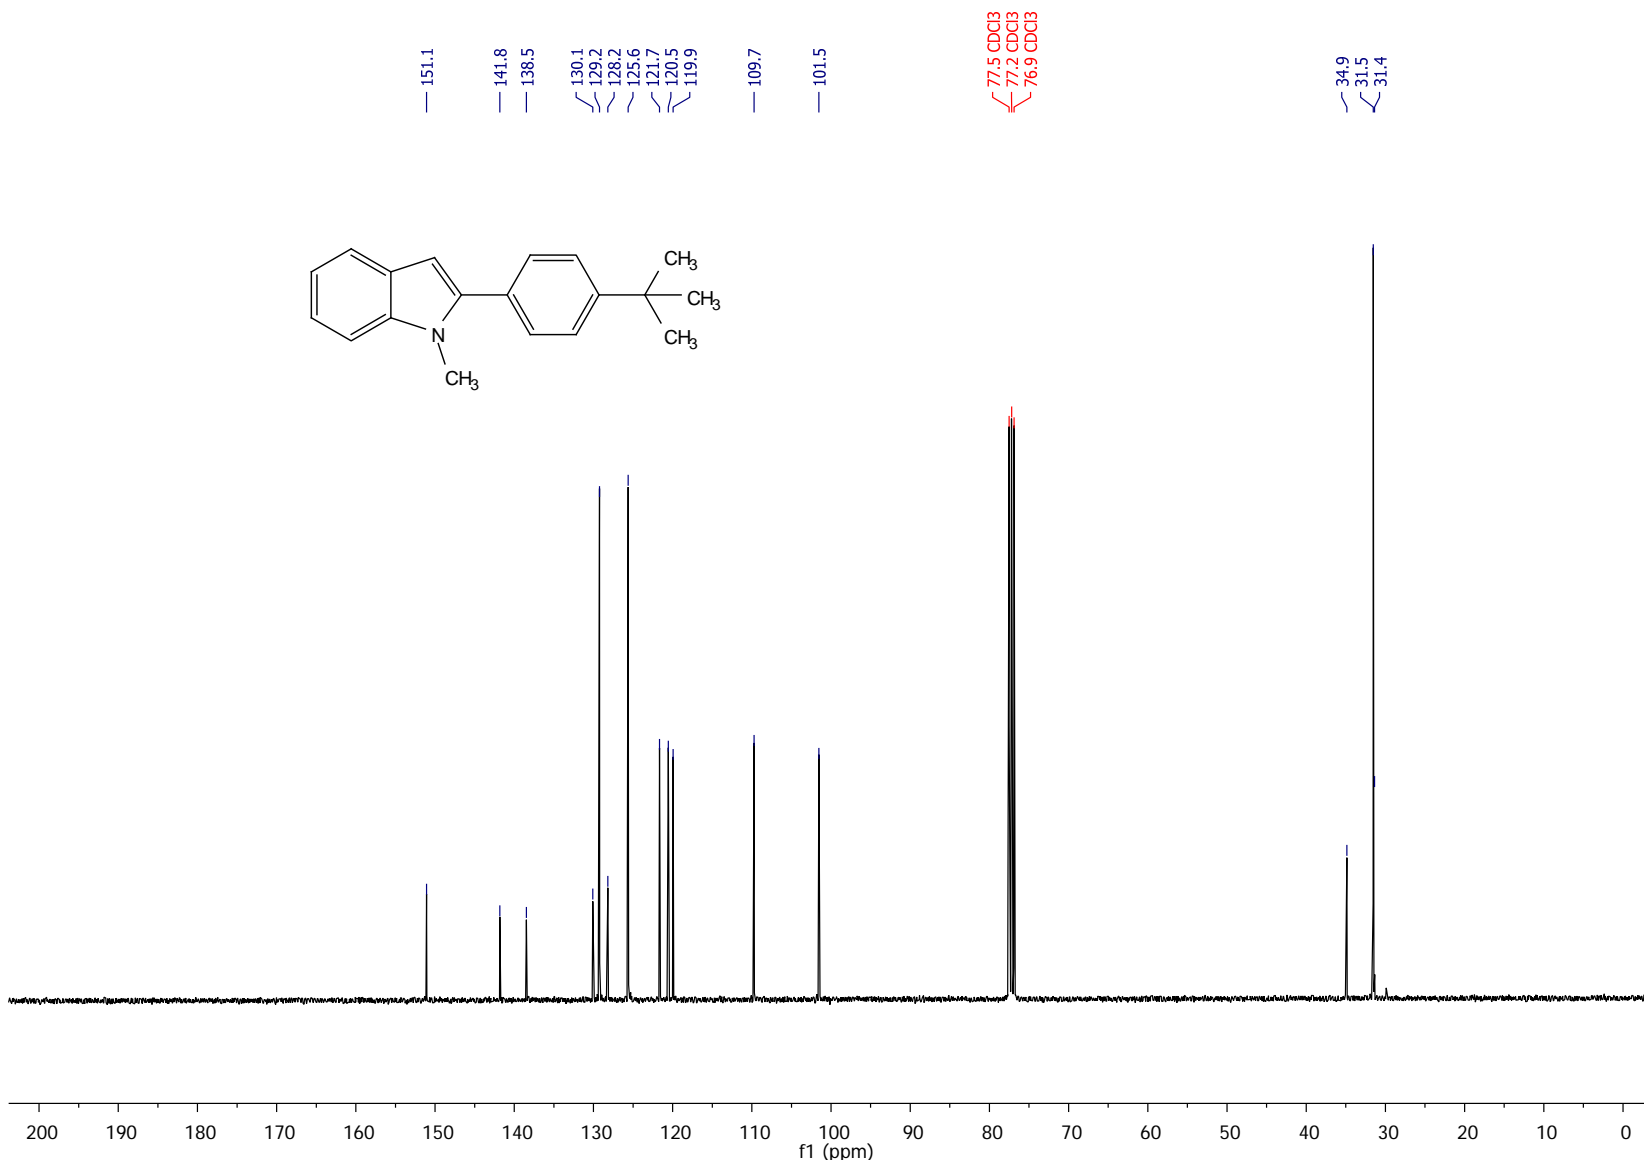

2-(4-methoxyphenyl)-1-methyl-1H-indole (3h)

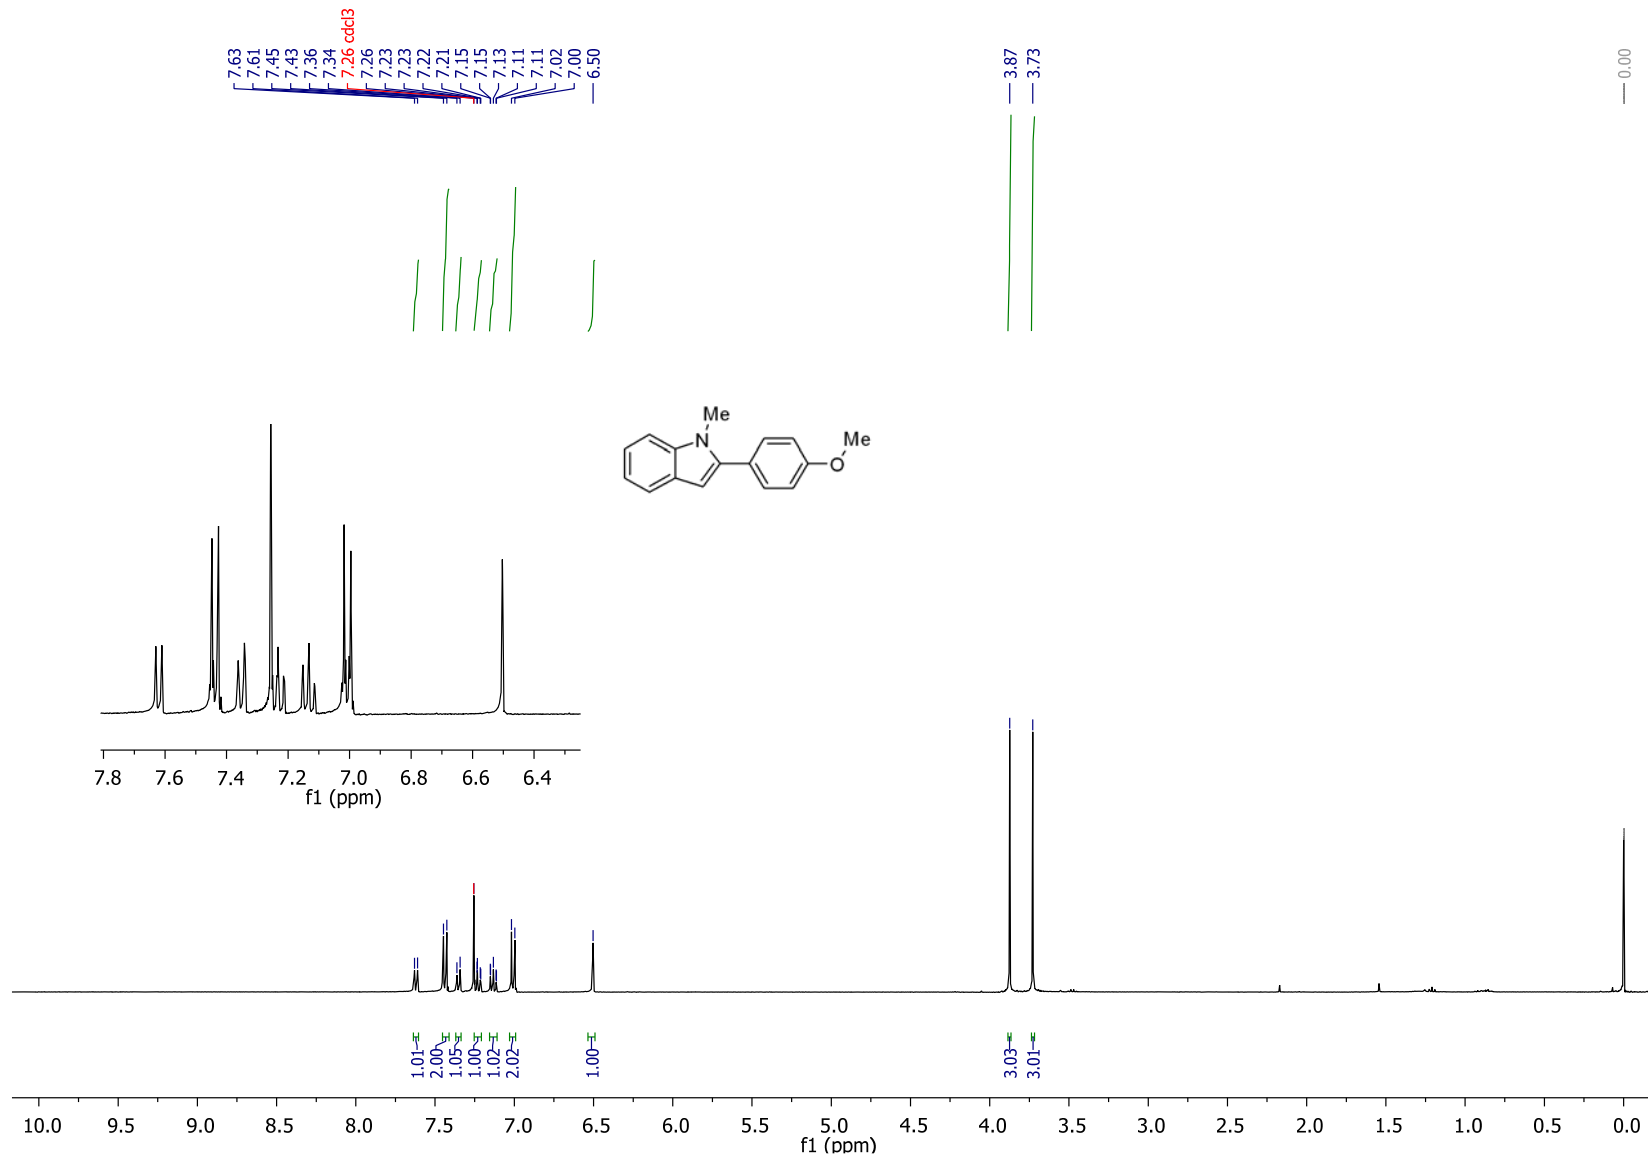

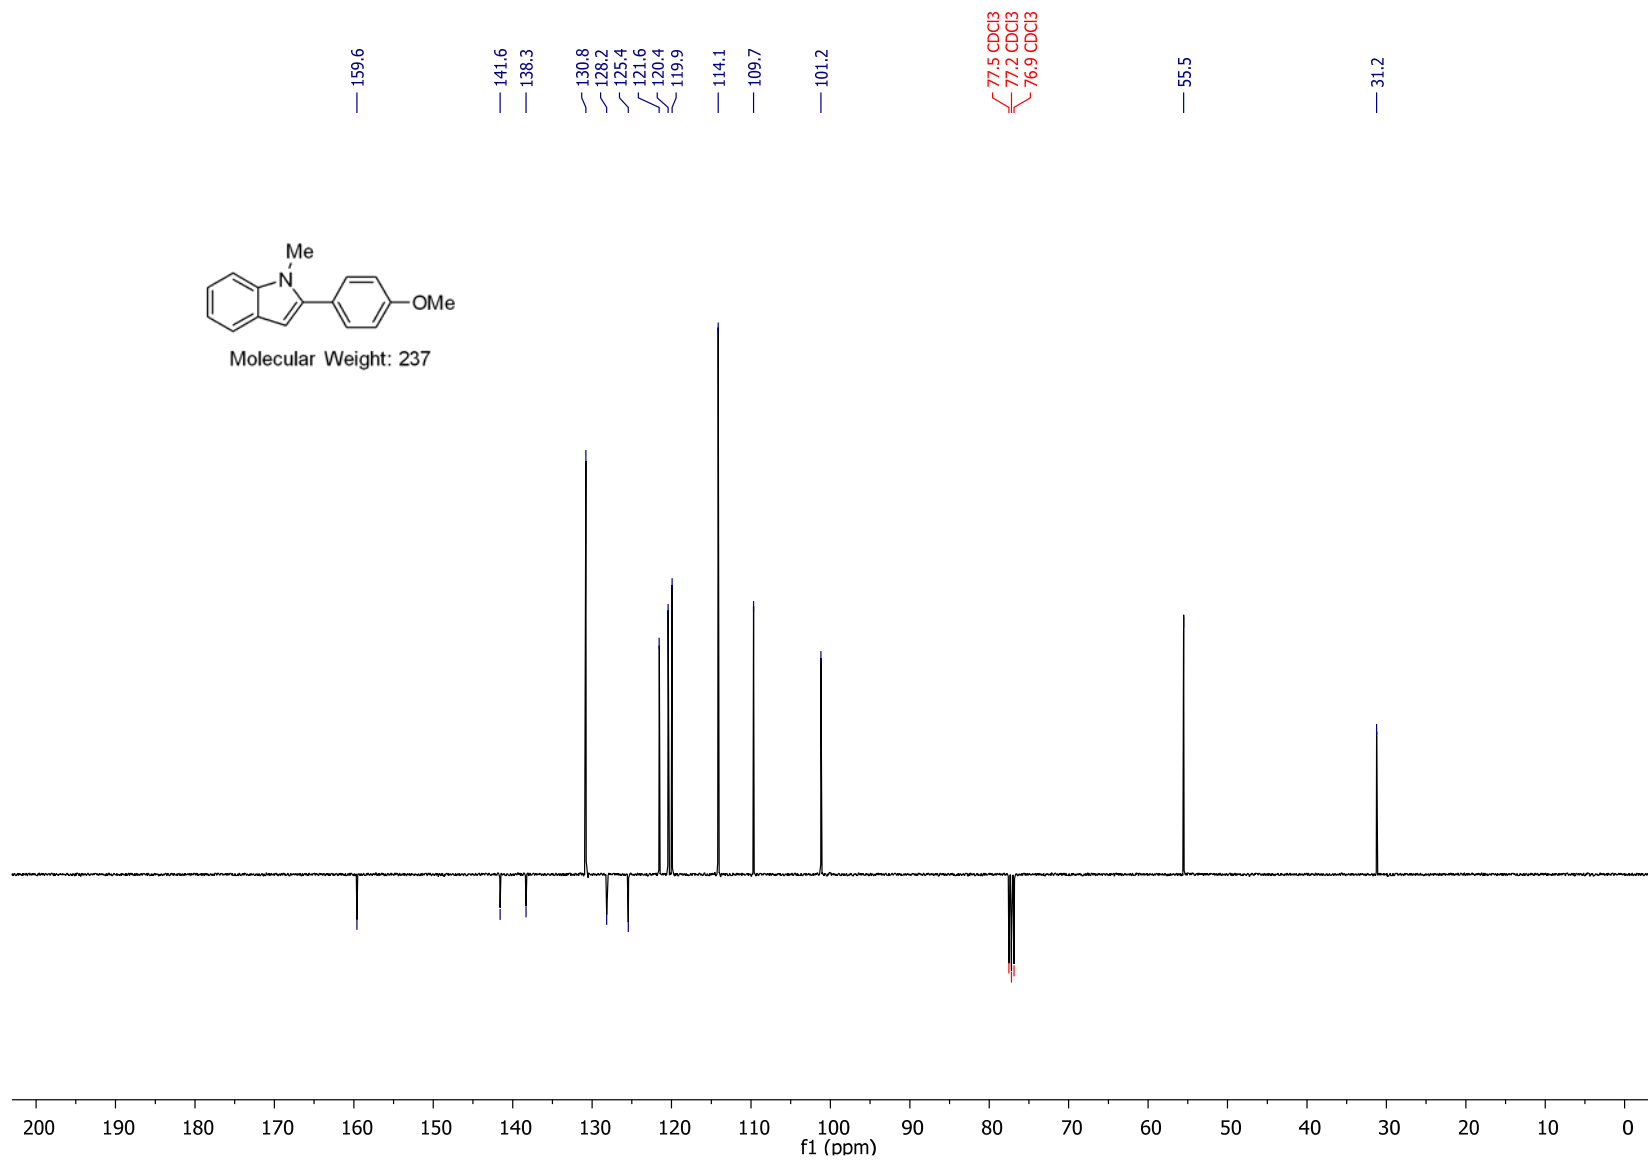

2-(3-methoxyphenyl)-1-methyl-1H-indole (3i)

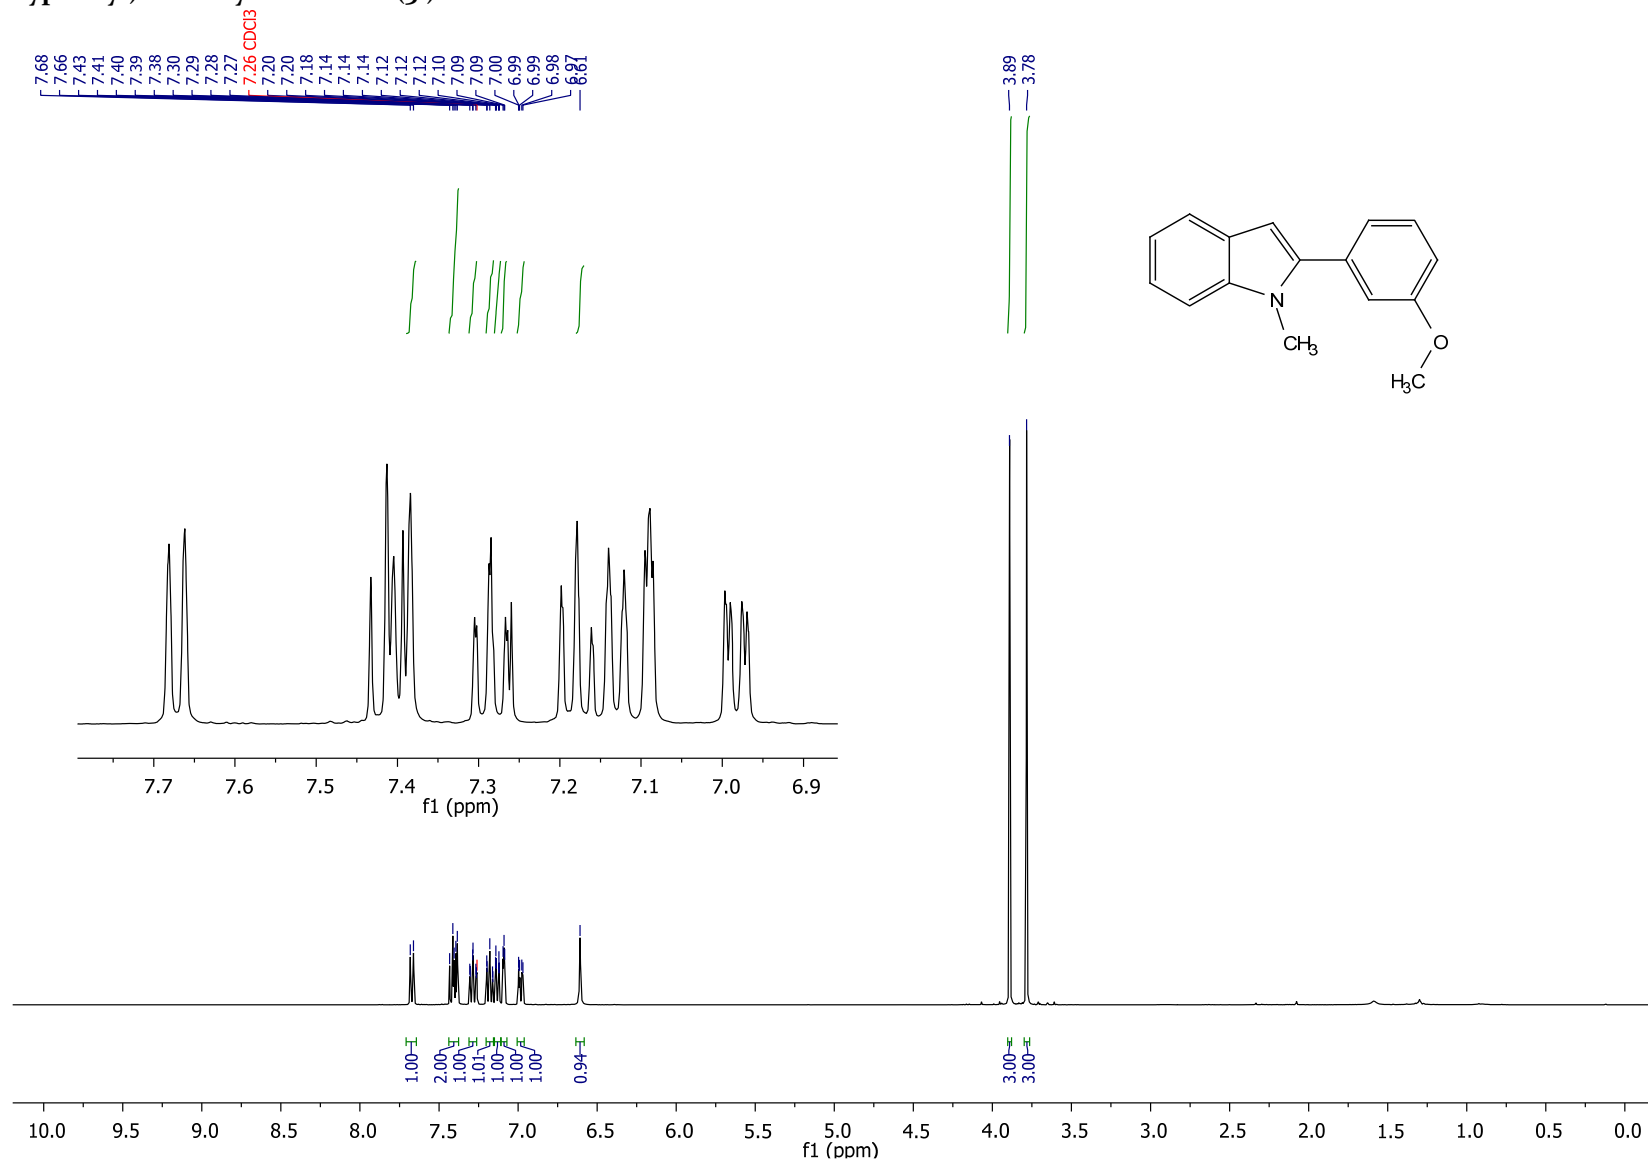

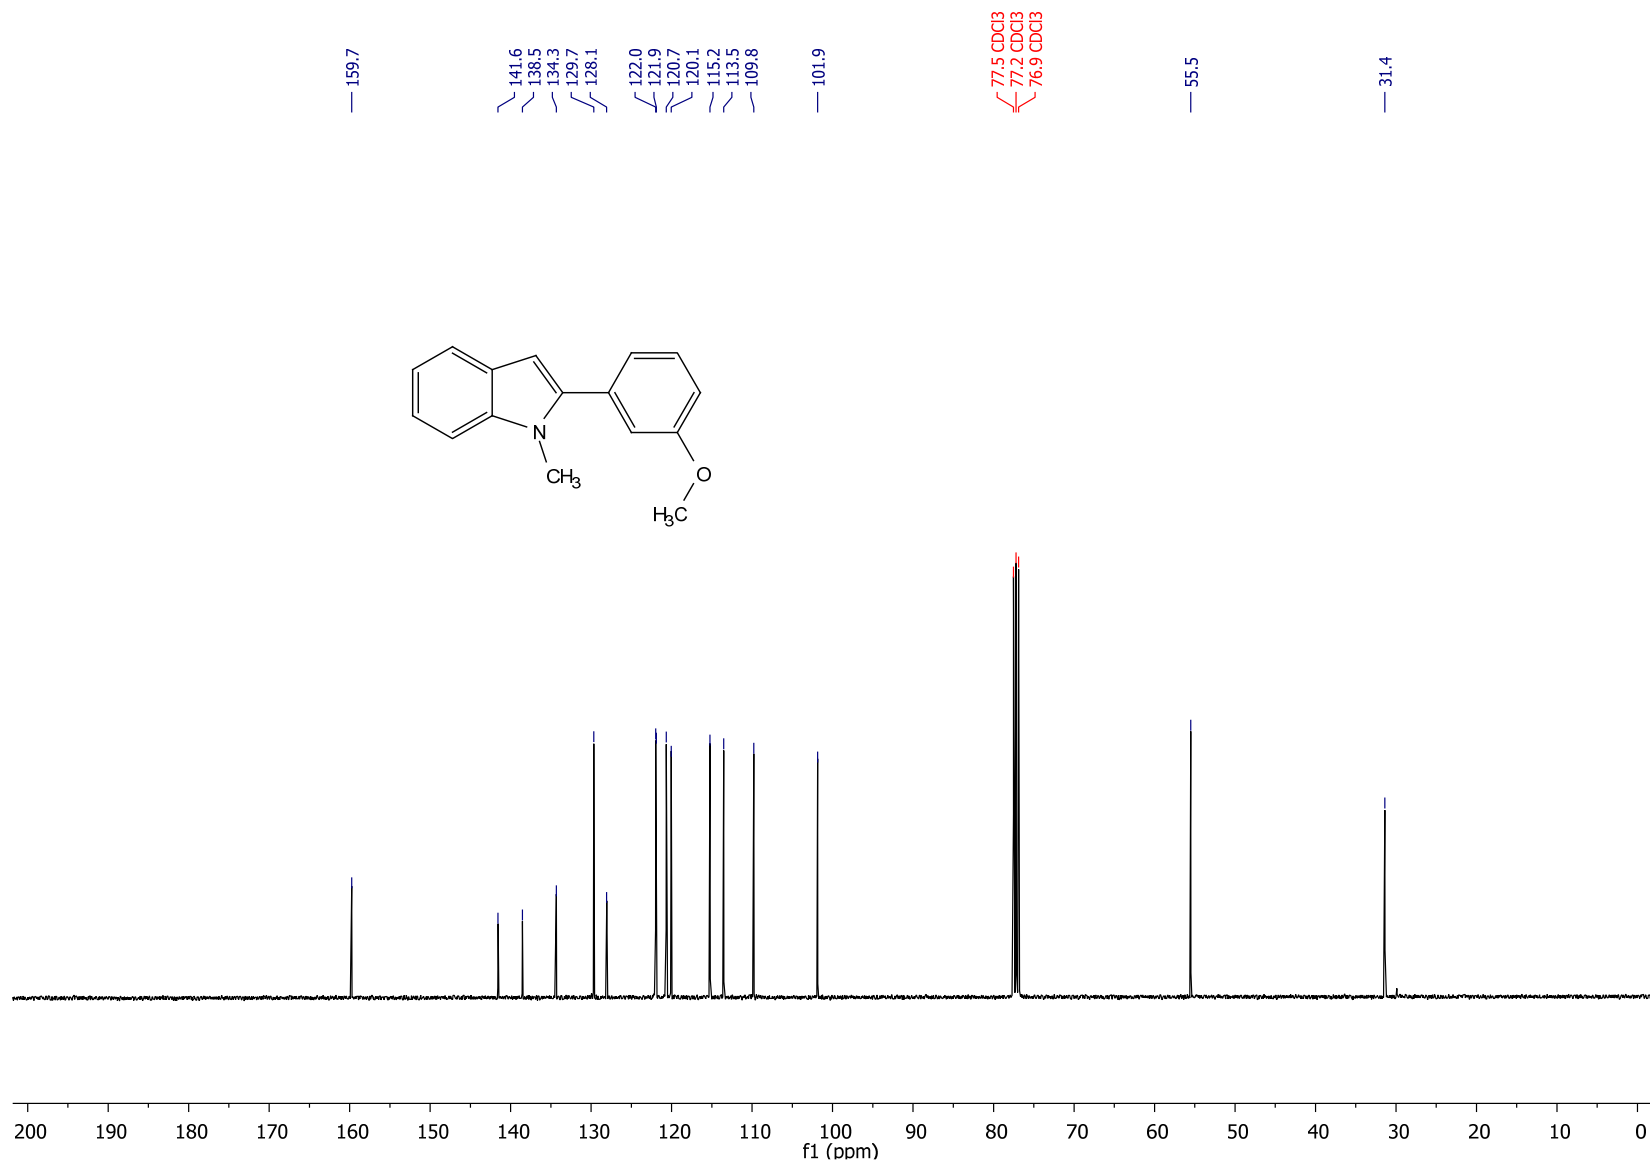

2-(2-methoxyphenyl)-1-methyl-1H-indole (3j)

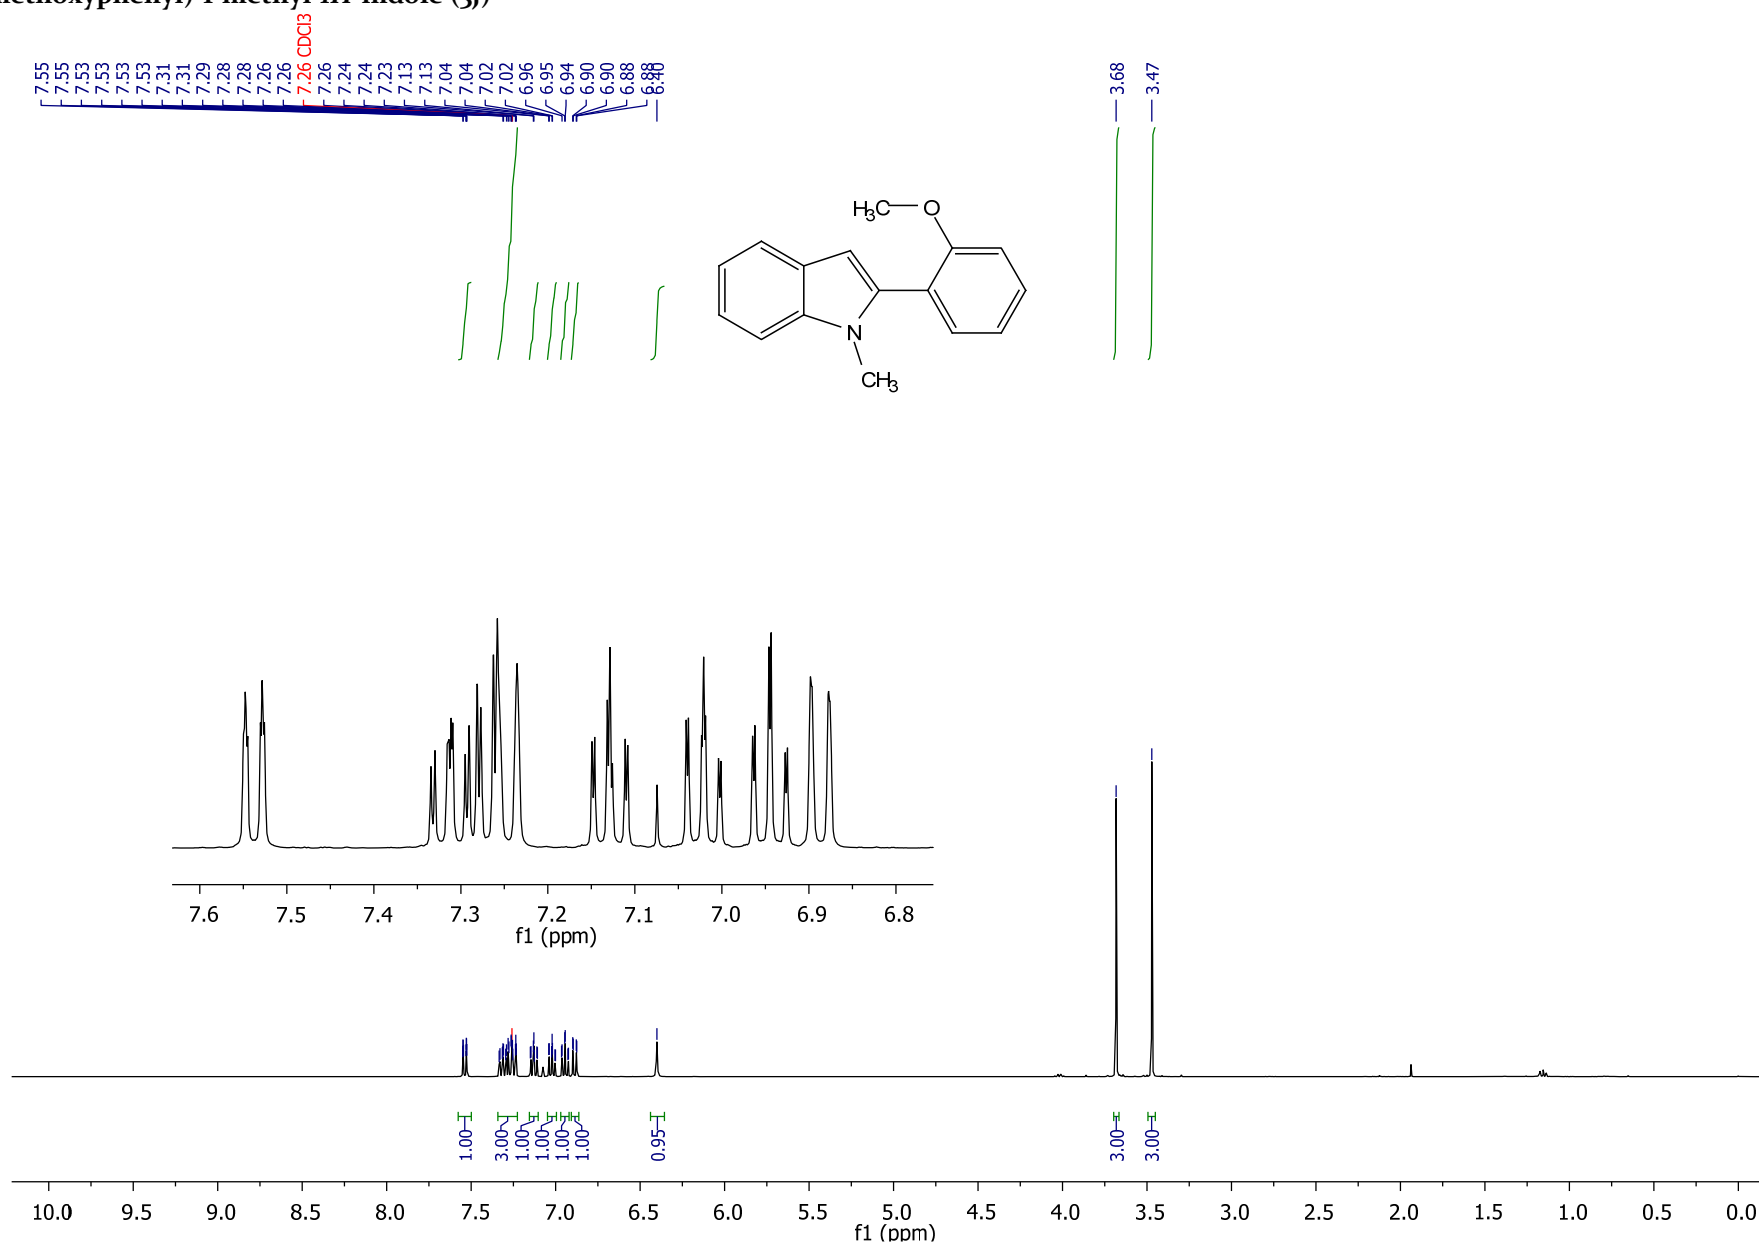



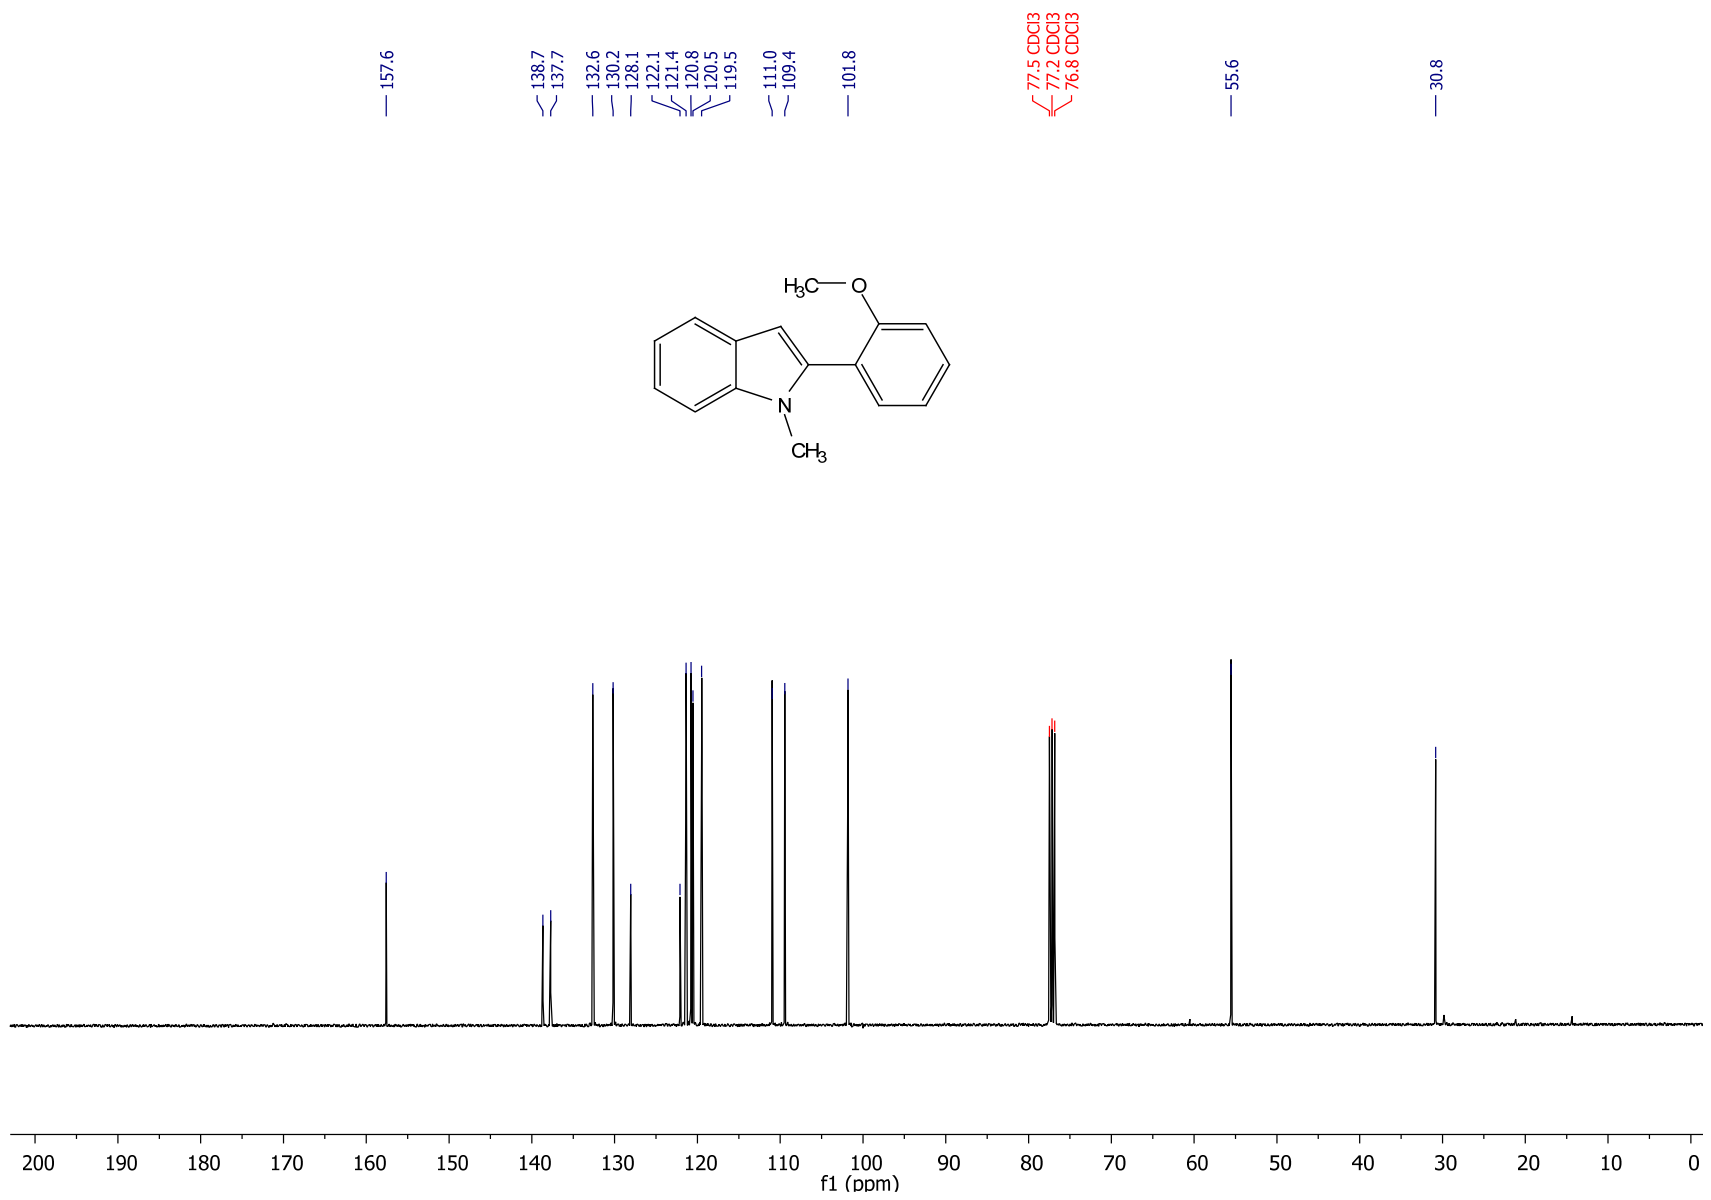

1-methyl-2-(3,4,5-trimethoxyphenyl)-1H-indole (3k)

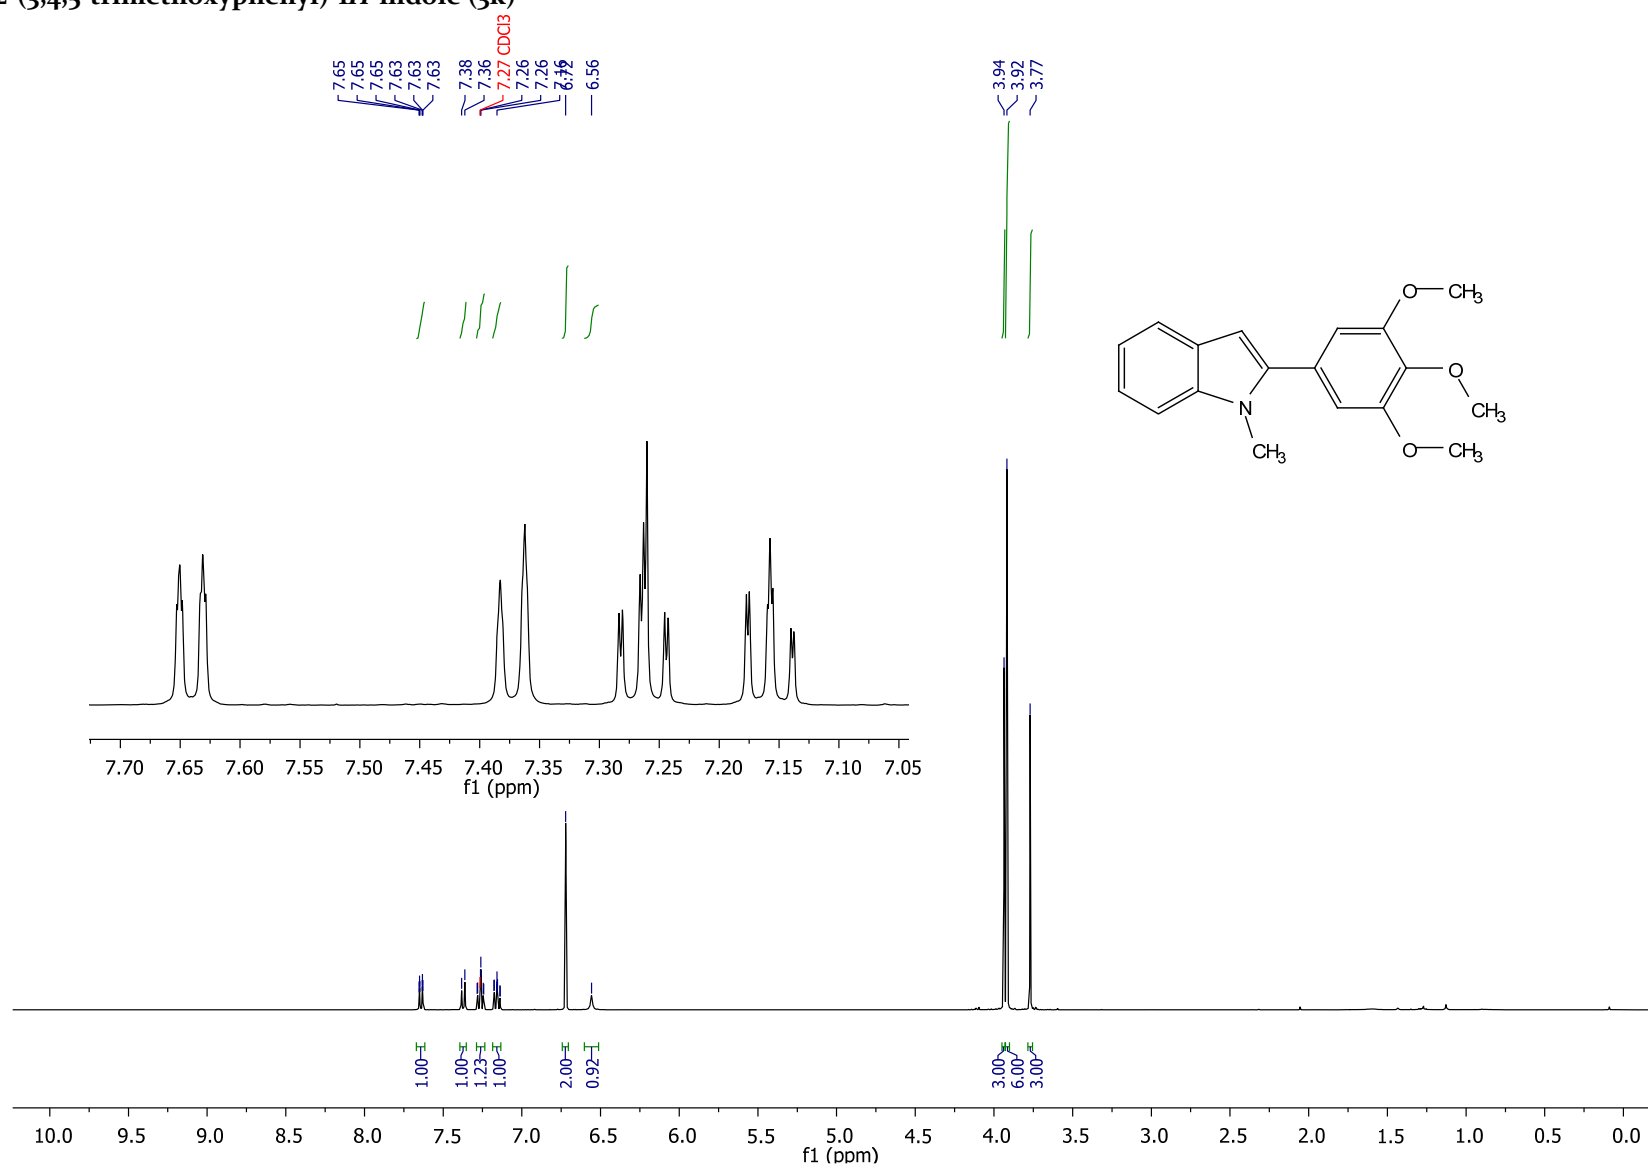

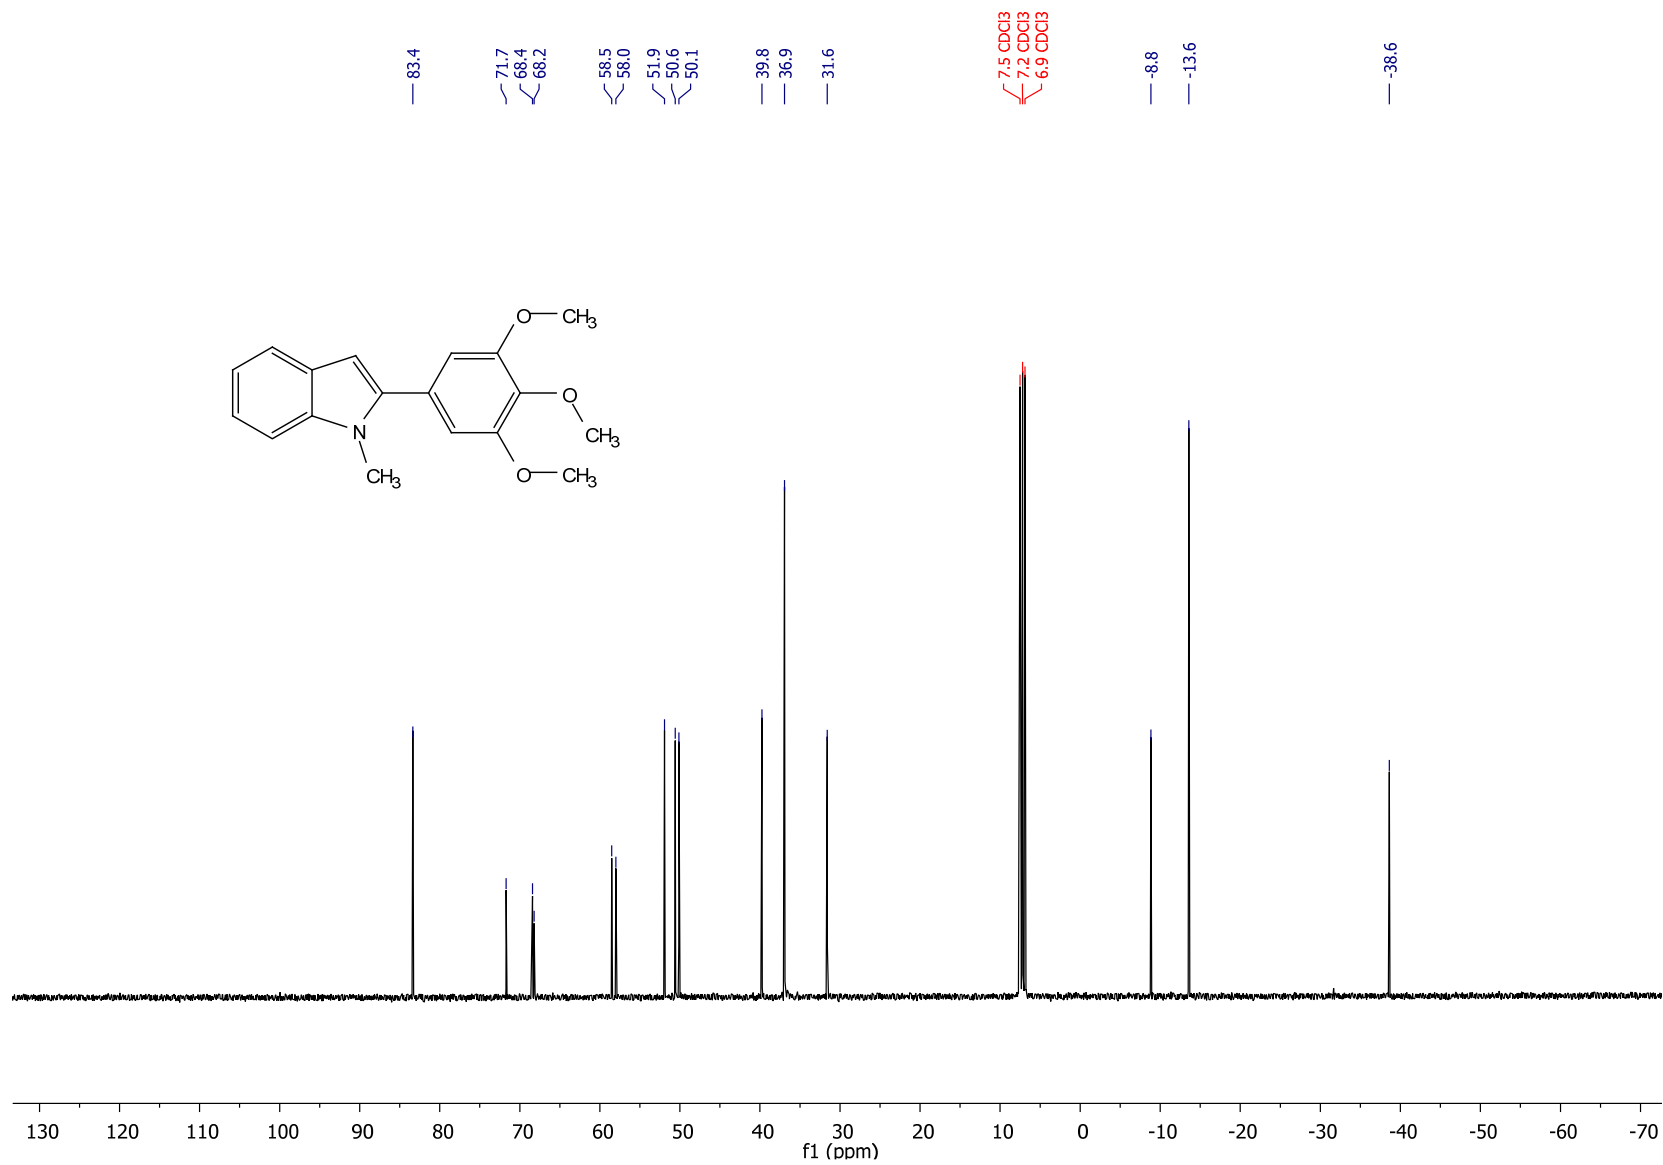

2-(2,4-dimethoxyphenyl)-1-methyl-1H-indole (31)

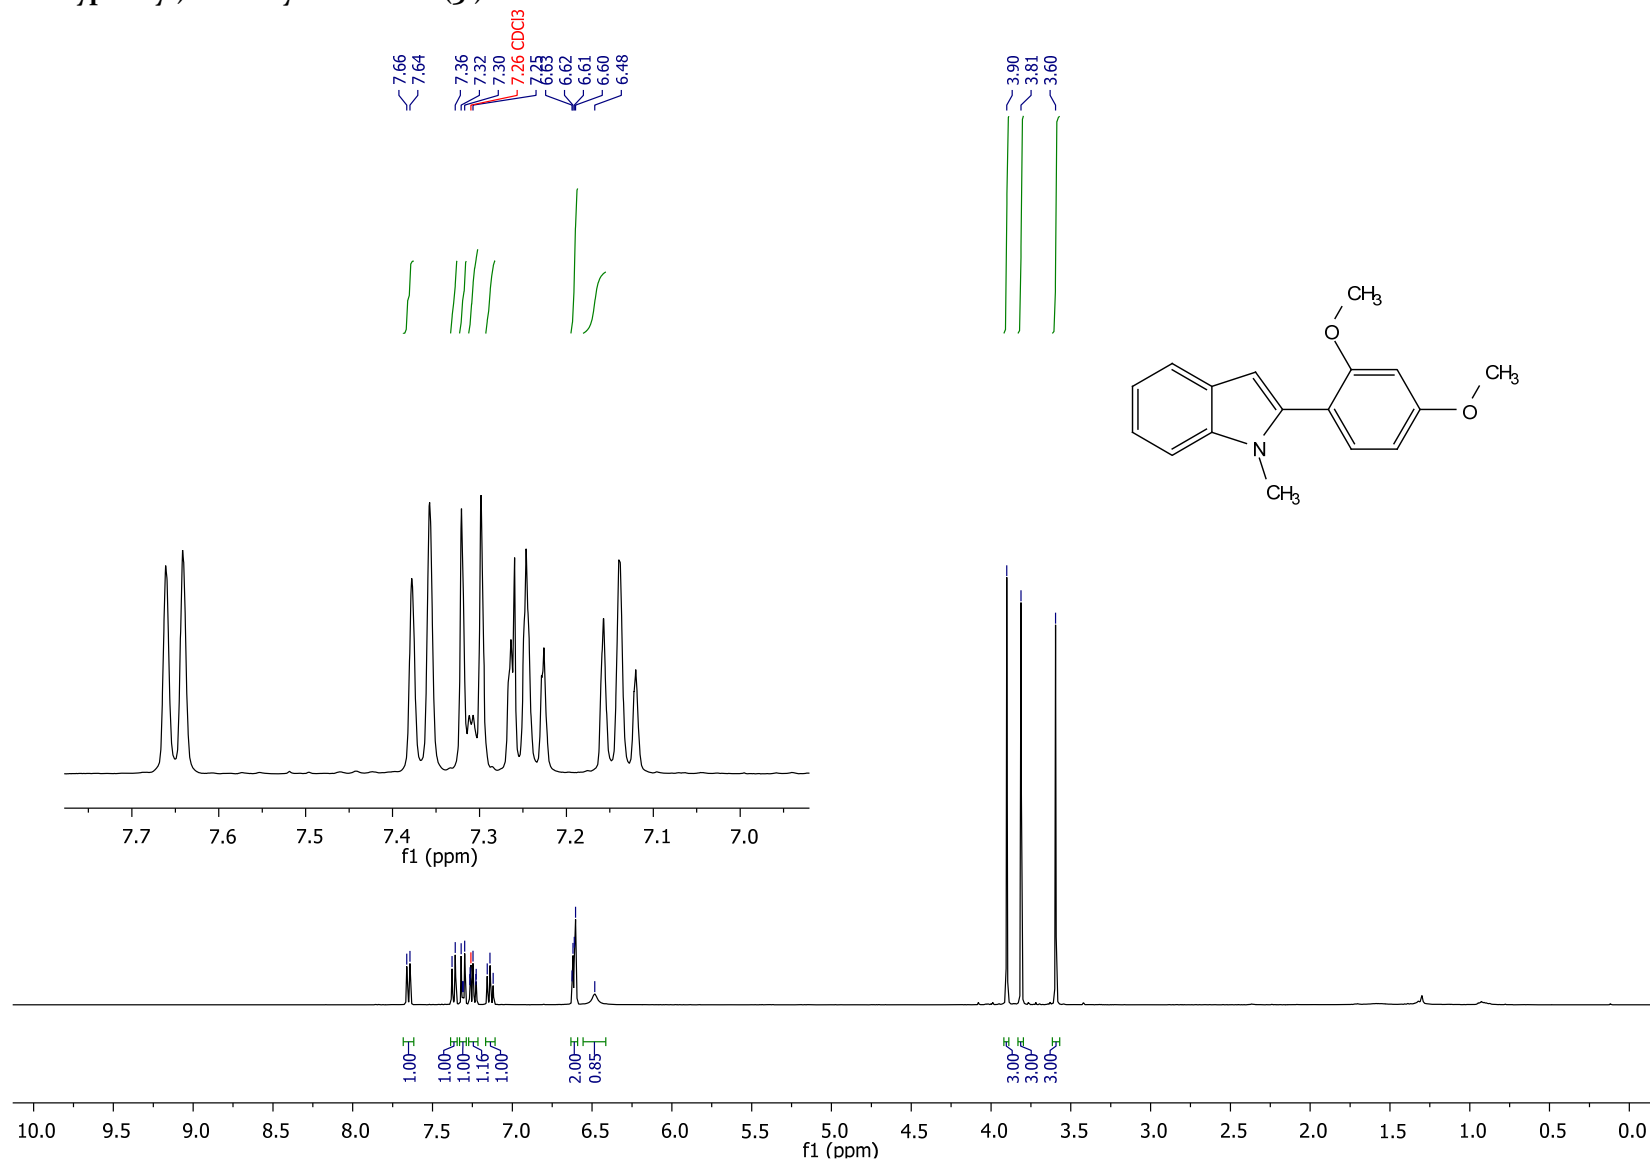

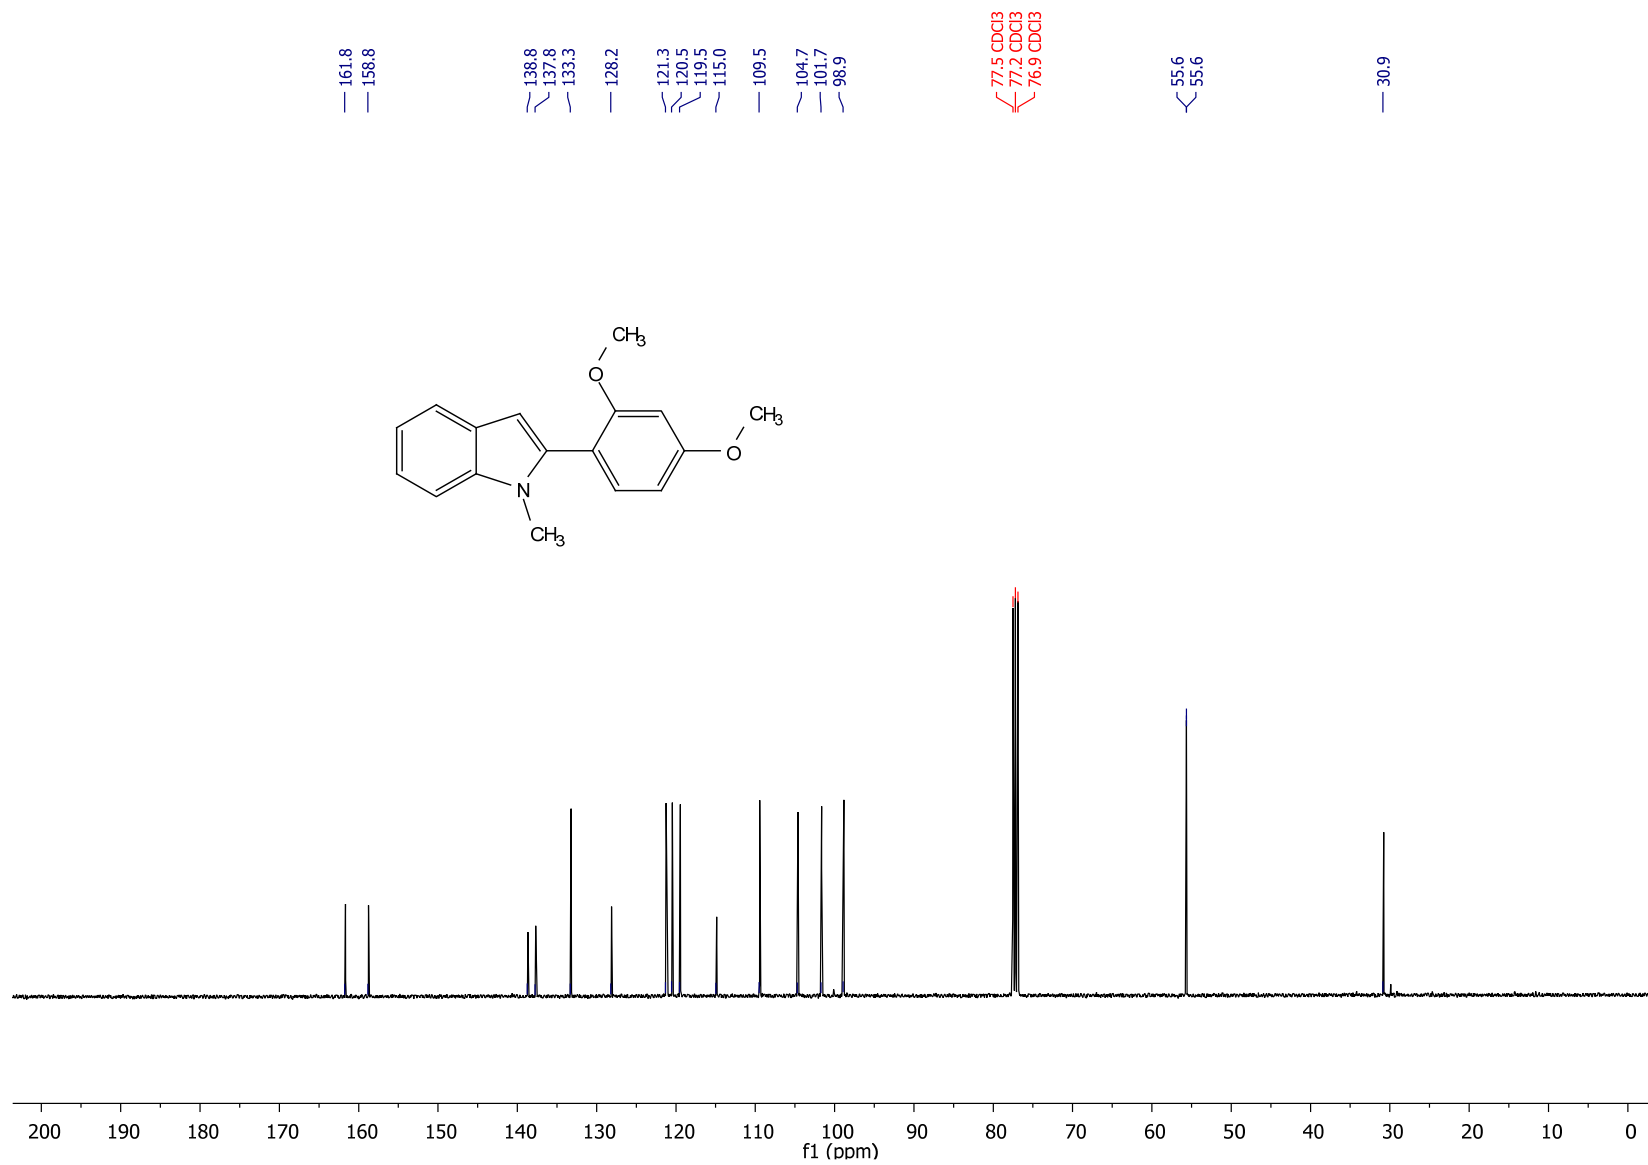

2-(3-chloro-4-methoxyphenyl)-1-methyl-1H-indole (3m)

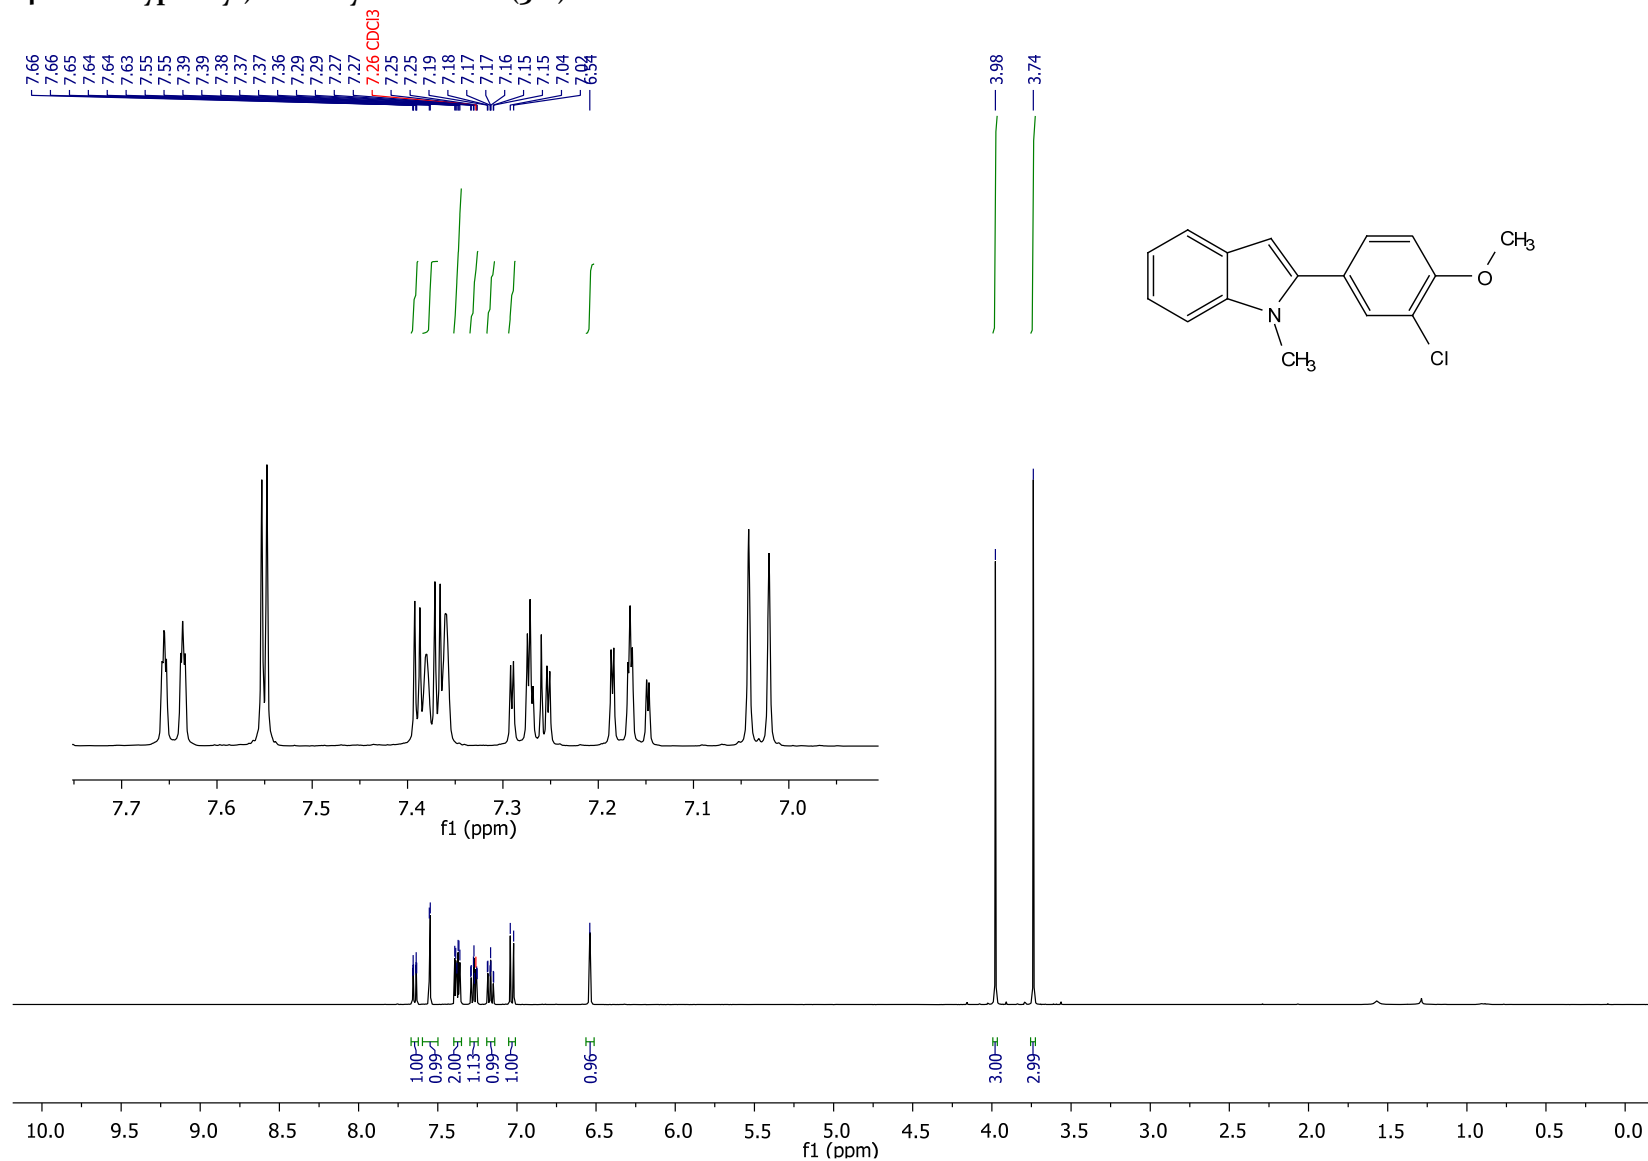

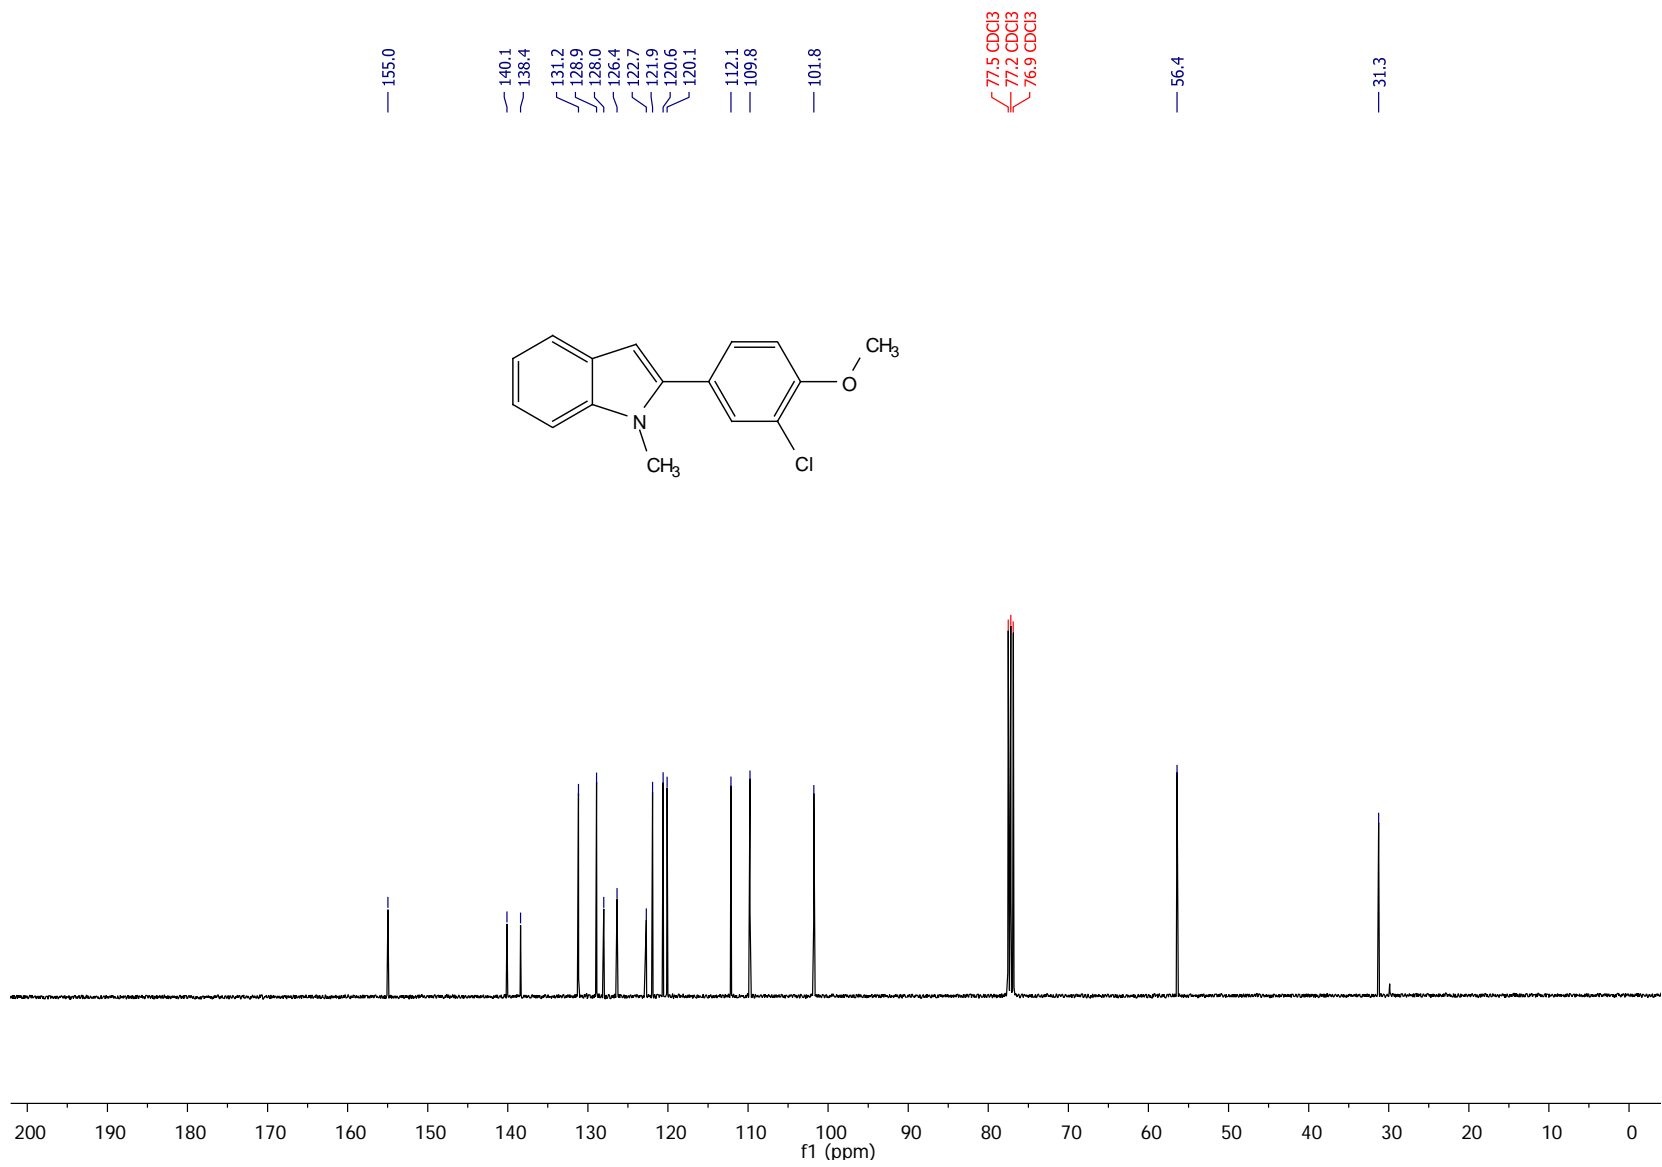

2-(4-methoxy-2-methylphenyl)-1-methyl-1H-indole (3n)

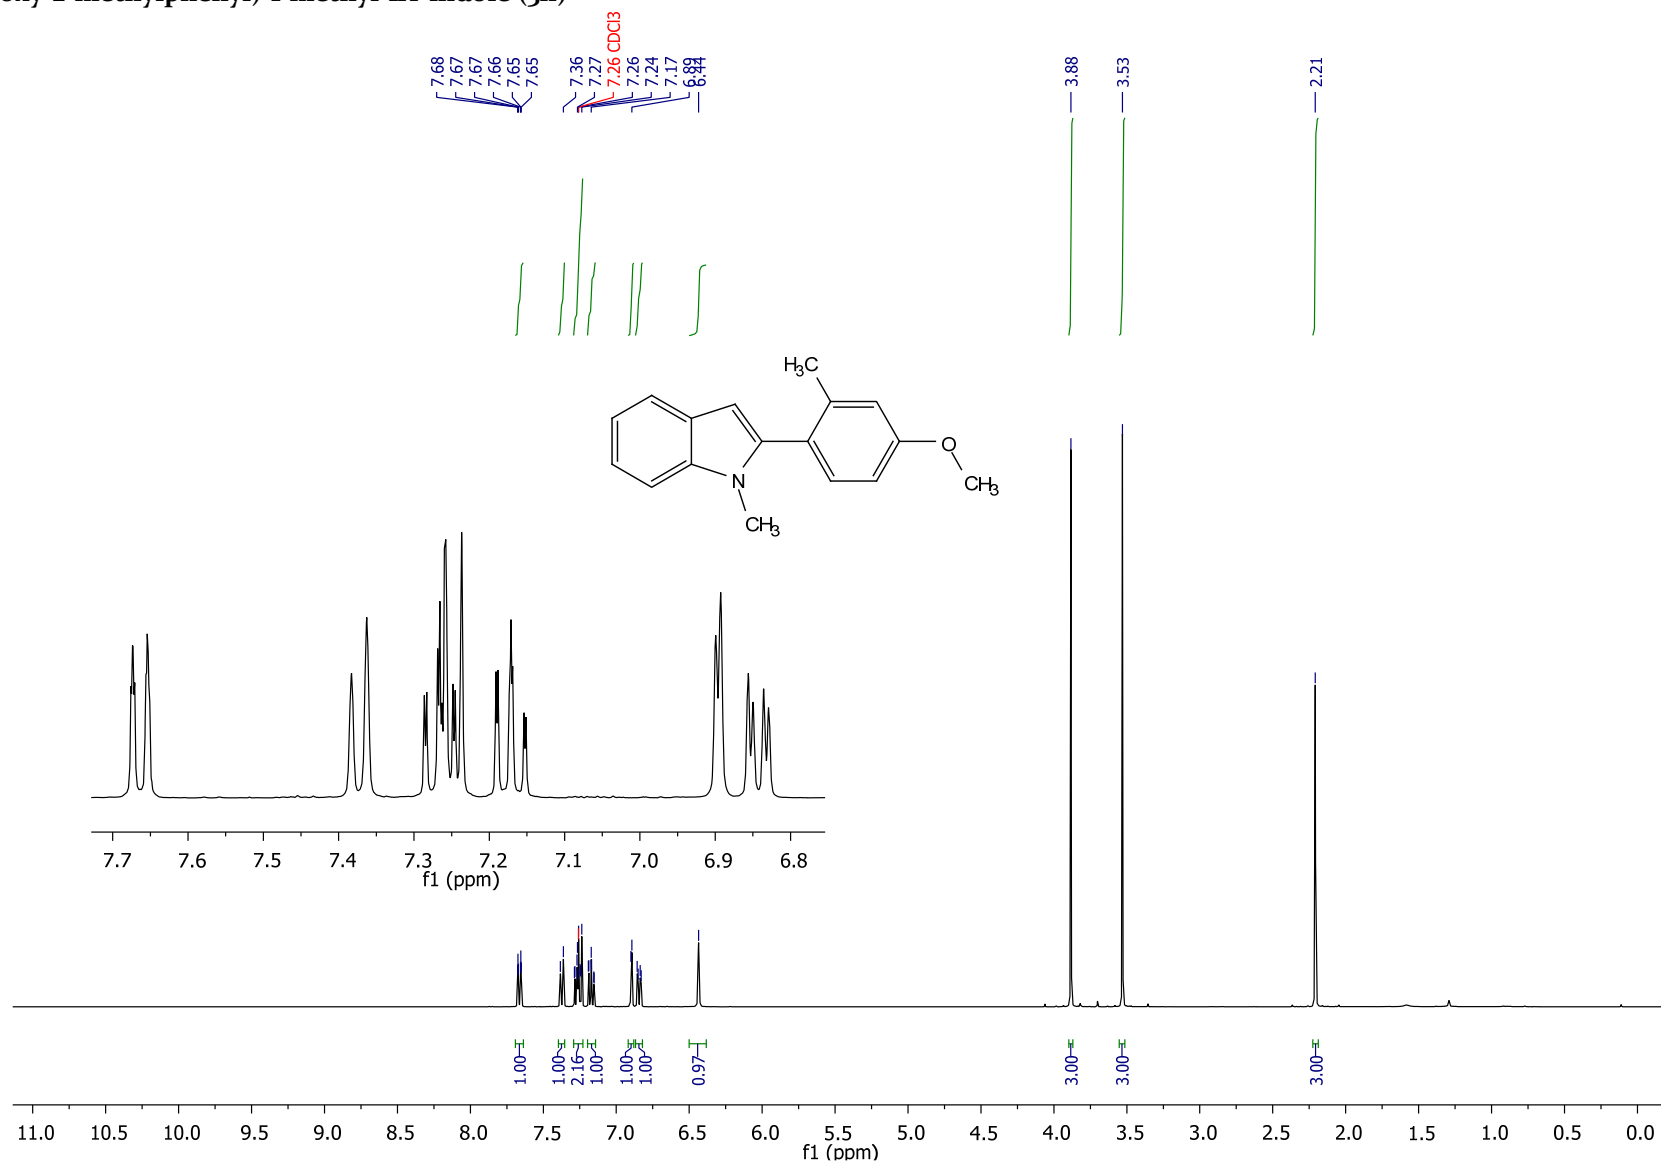



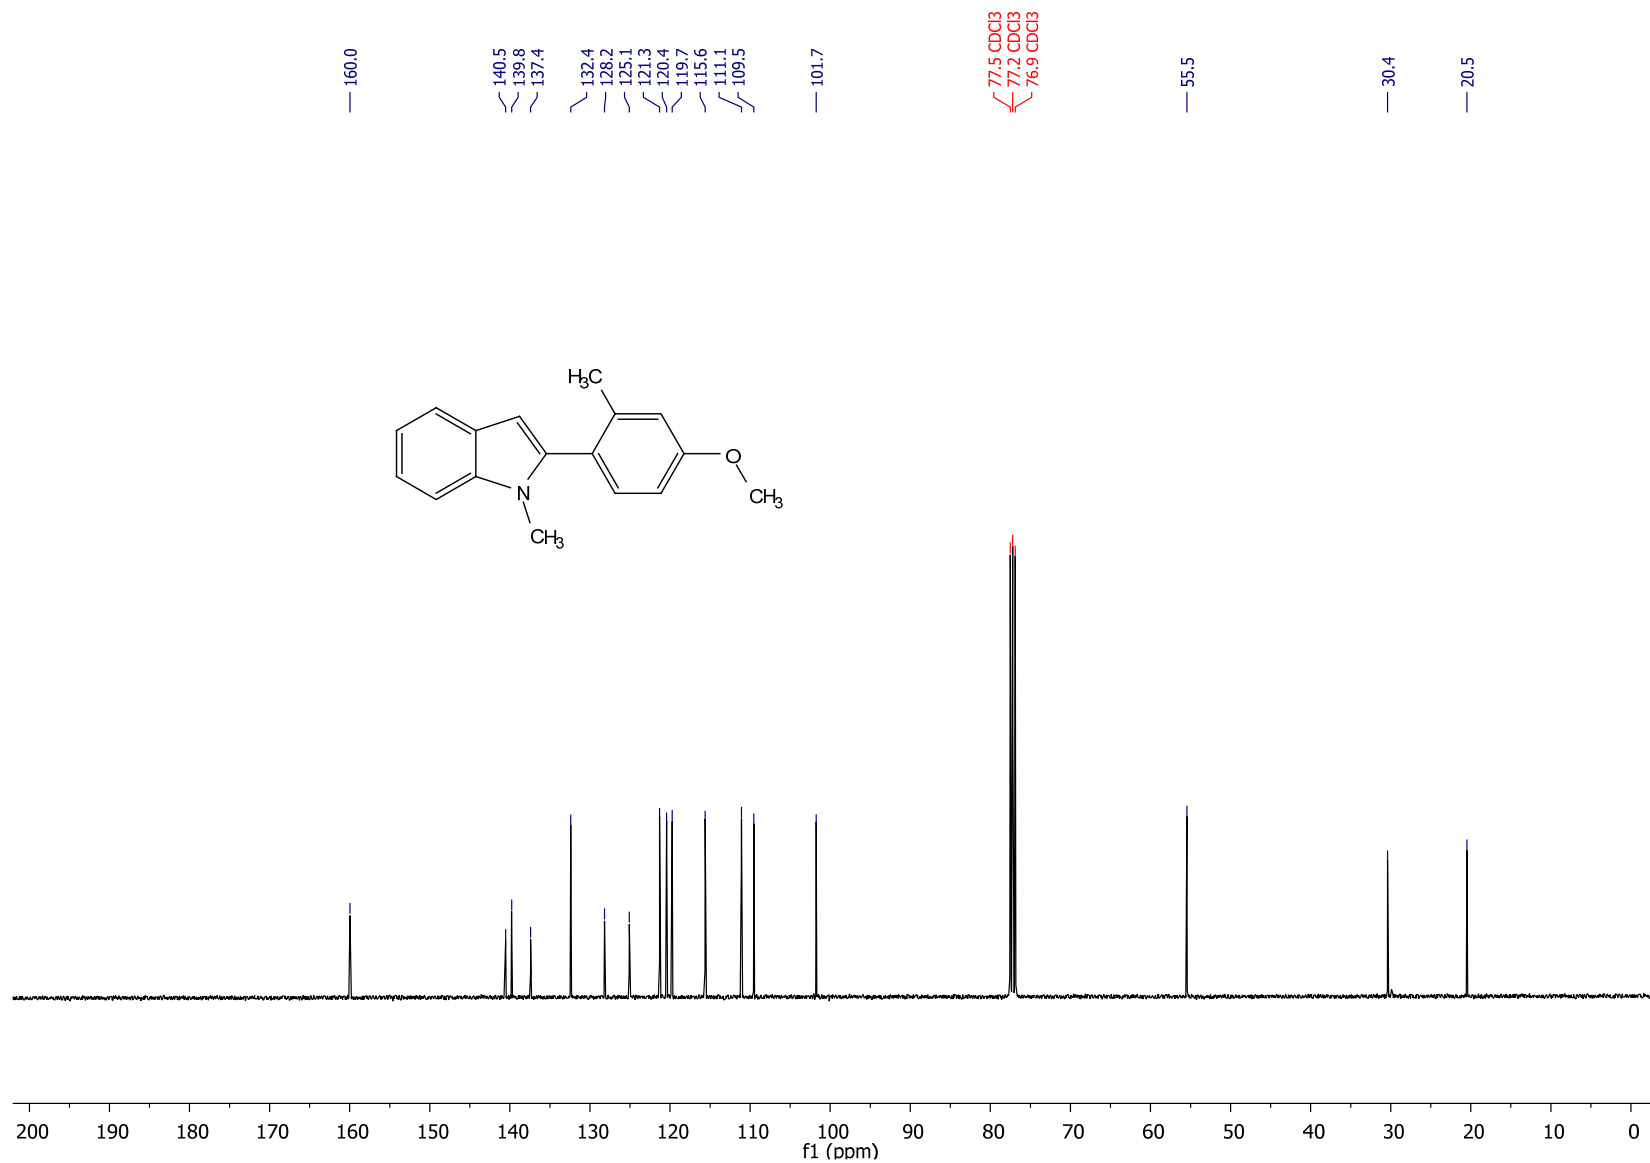

1-methyl-2-(4-phenoxyphenyl)-1H-indole (30)

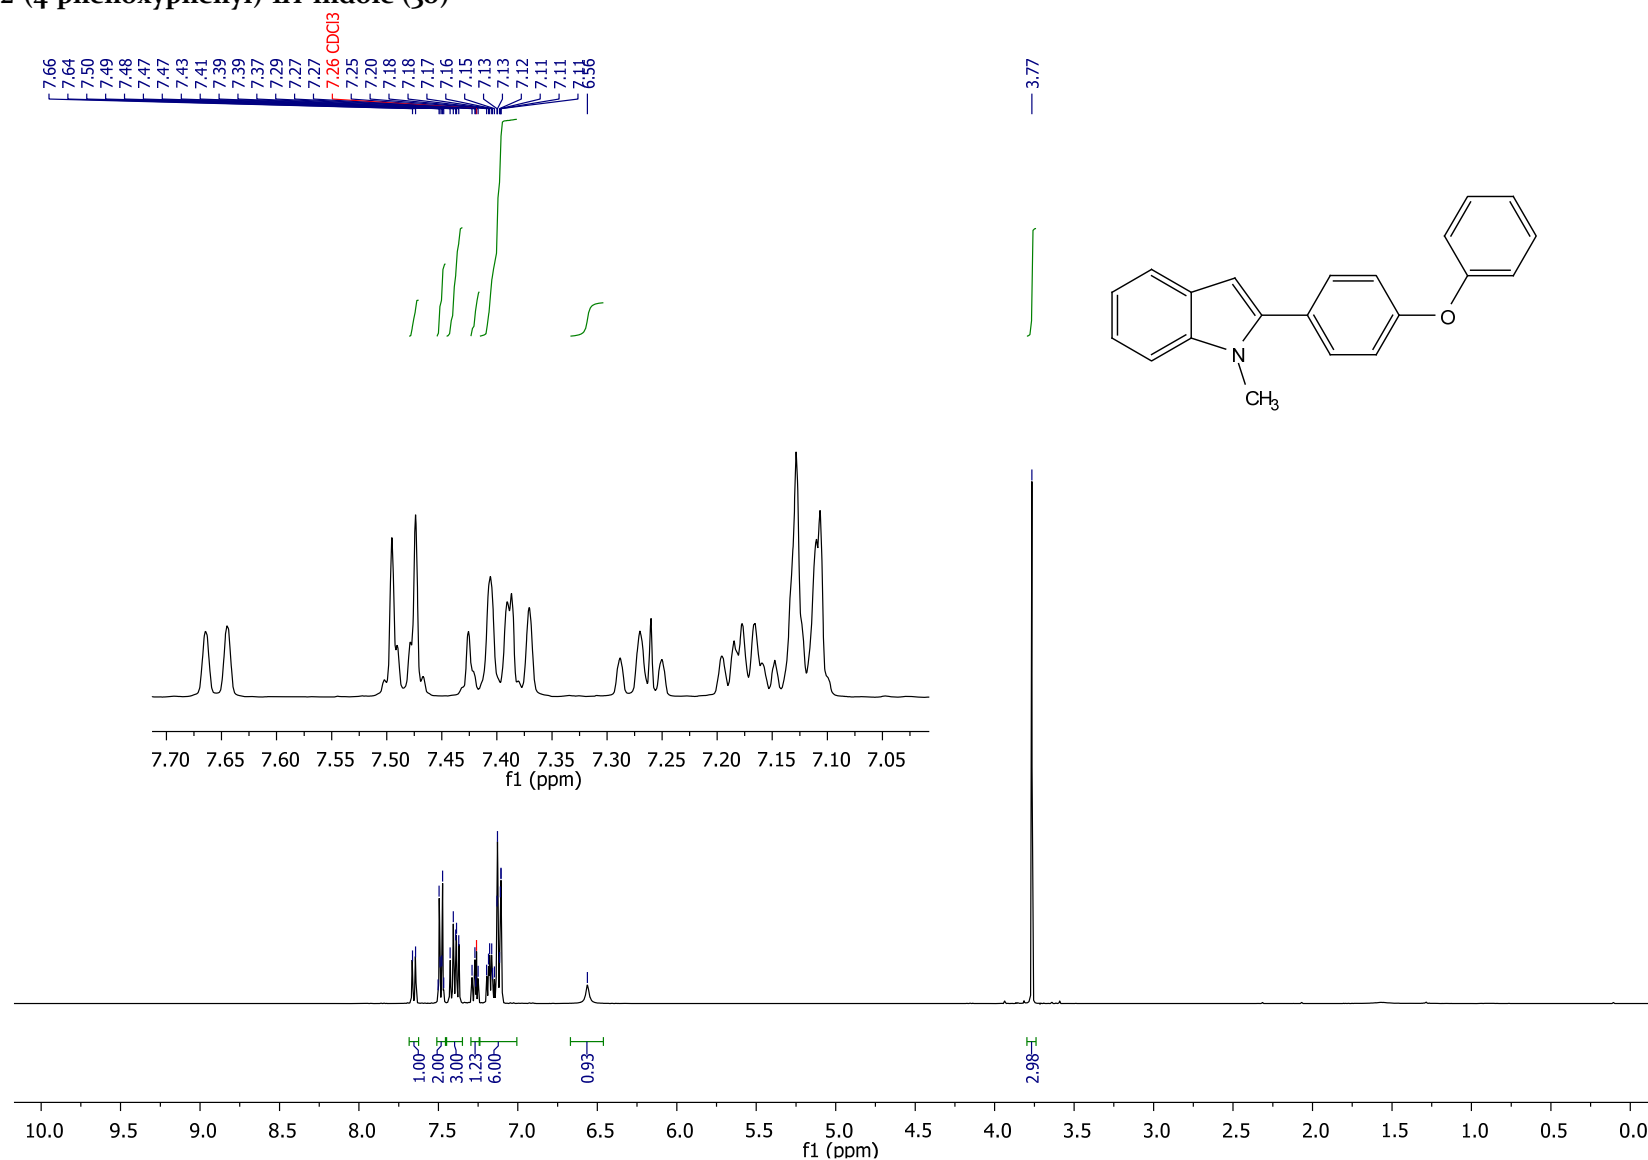

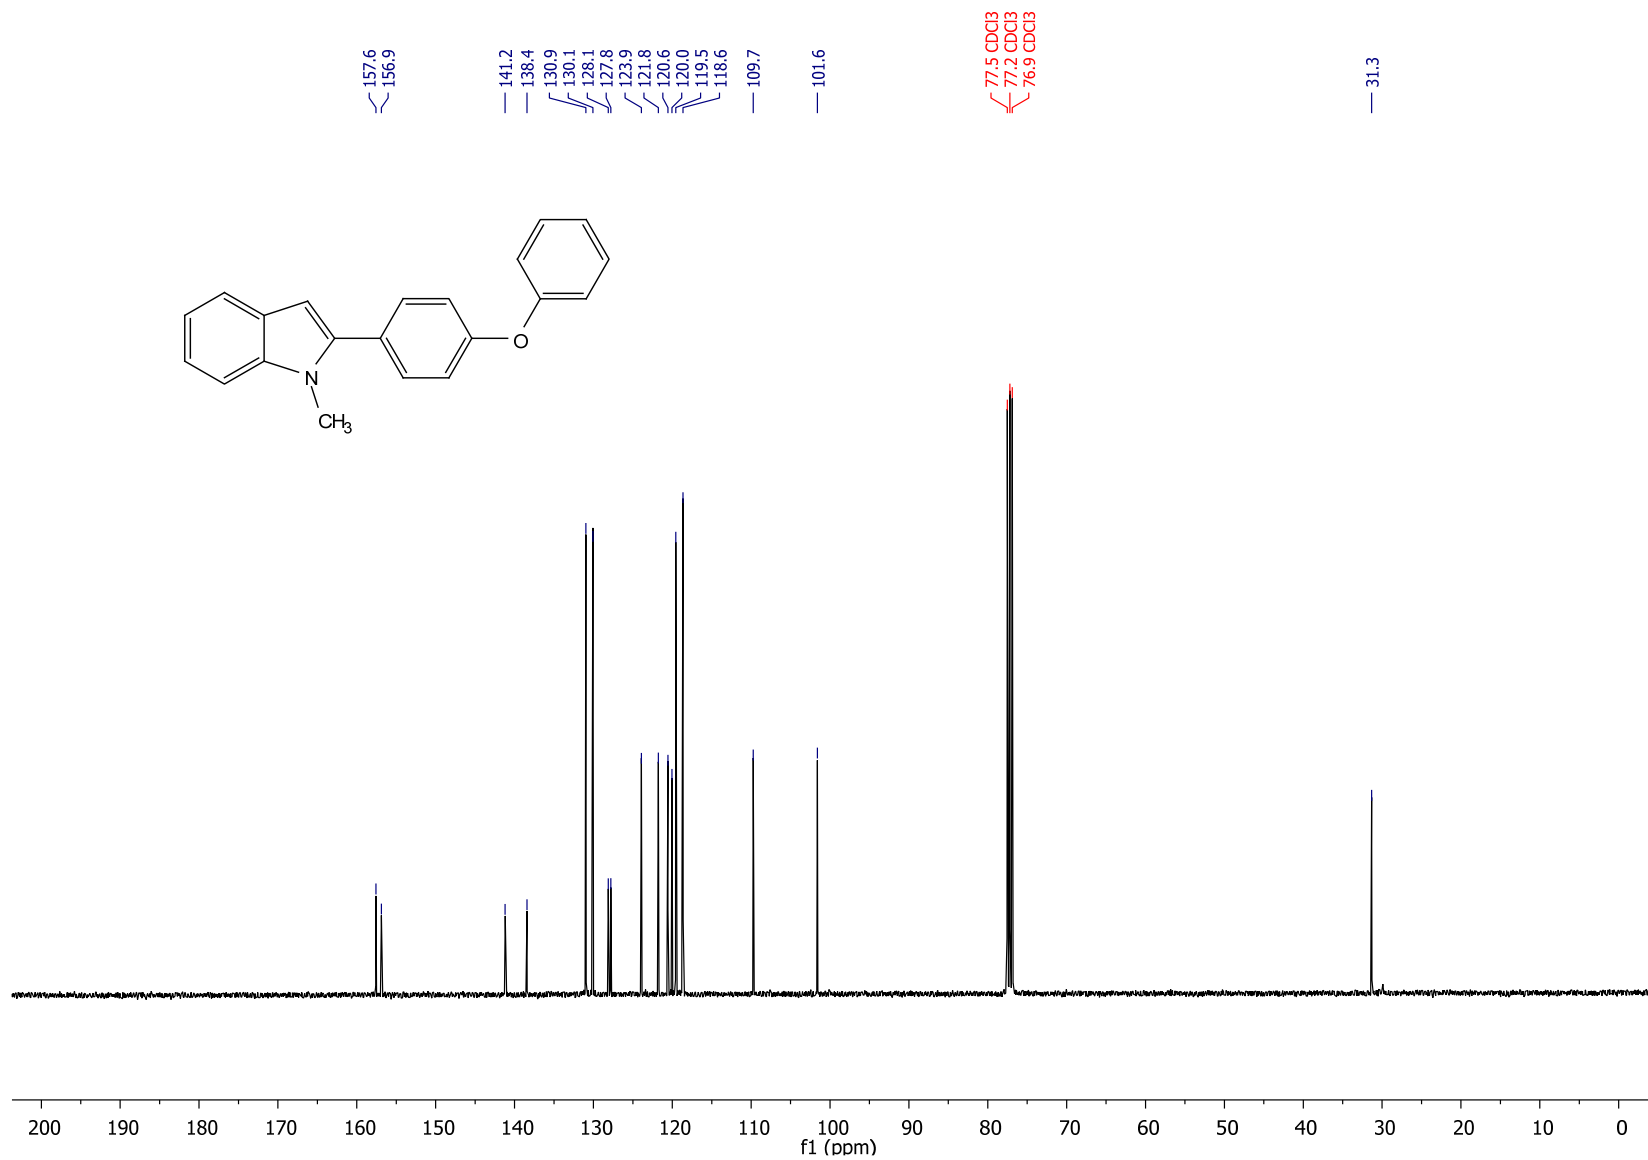

2-(4'-hydroxyphenyl)-1-methyl-1H-indole (3p)

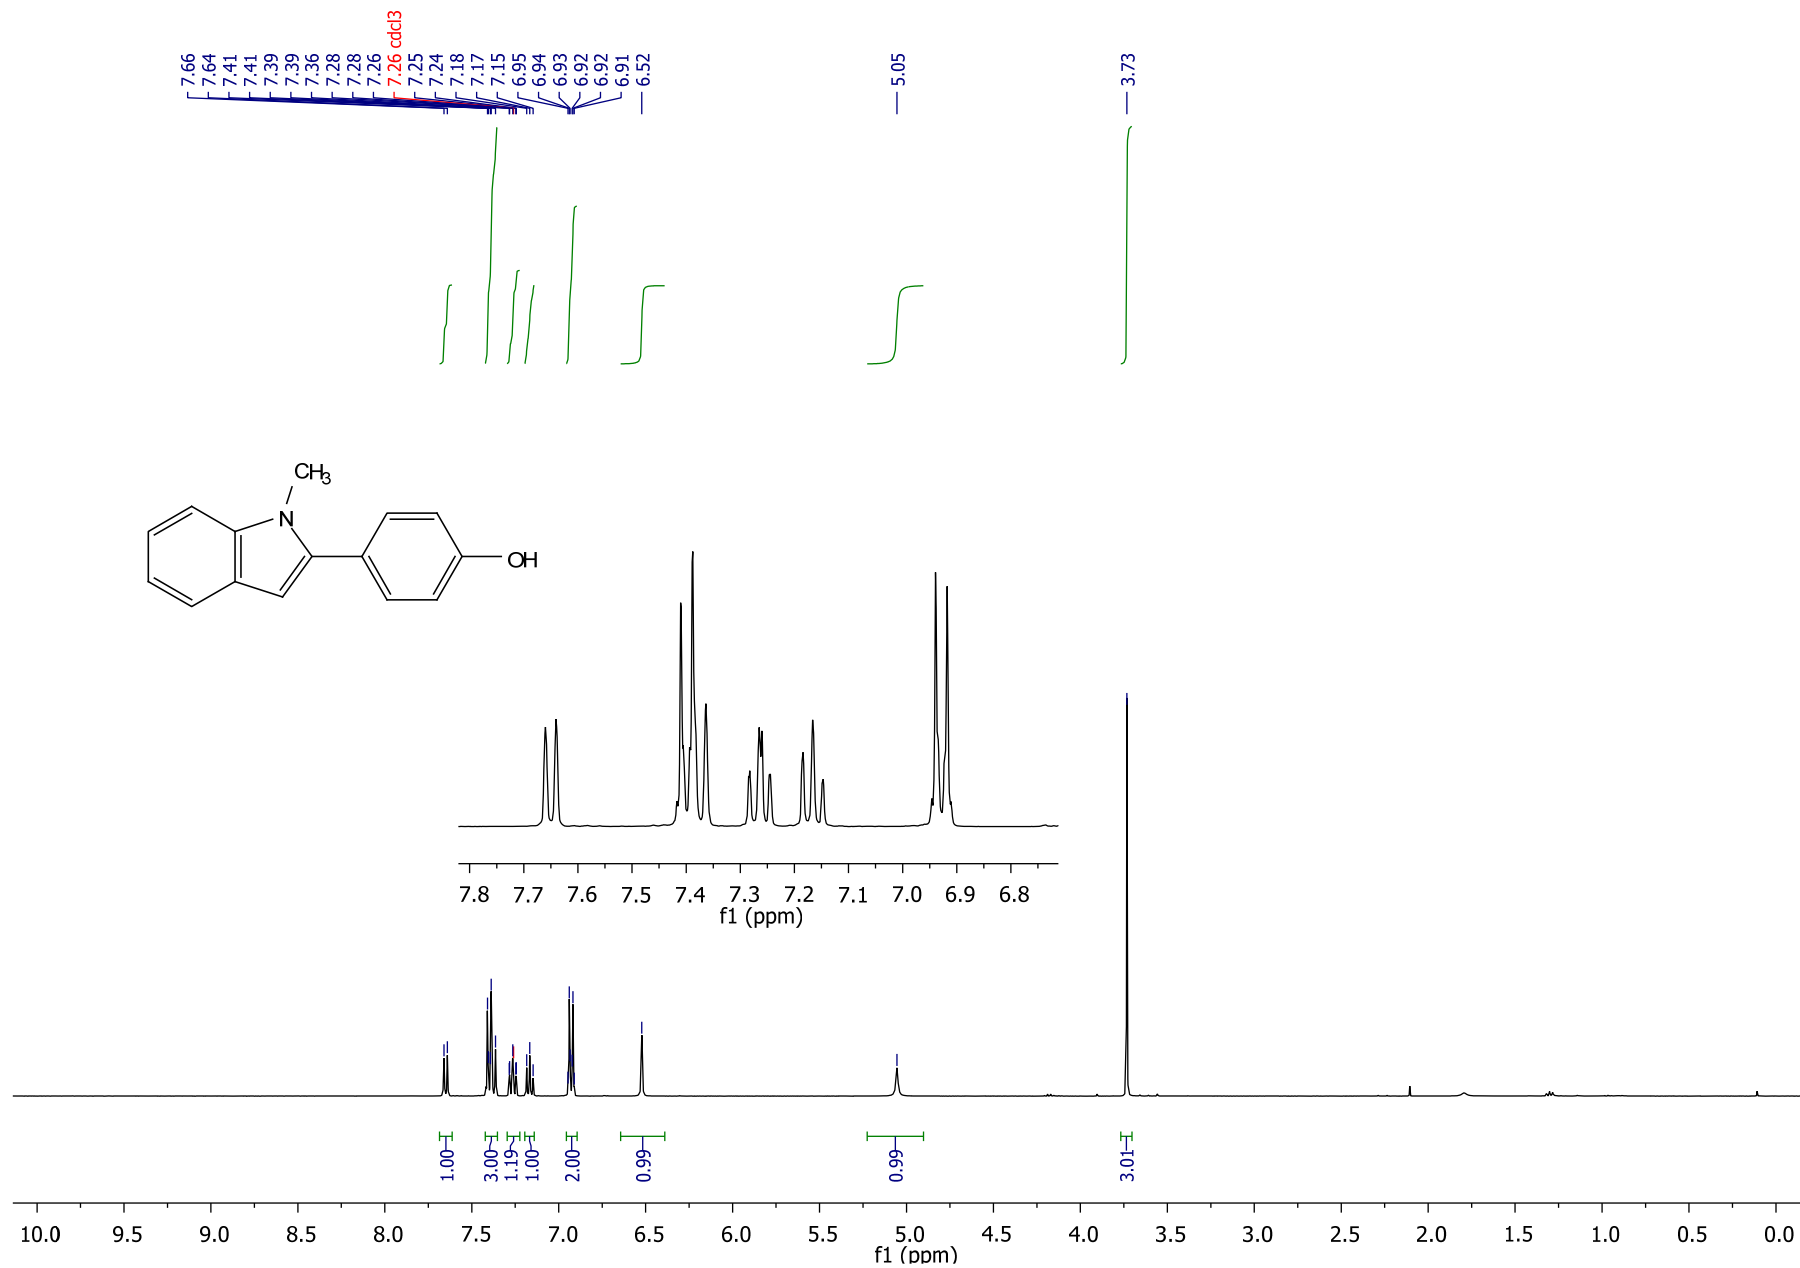

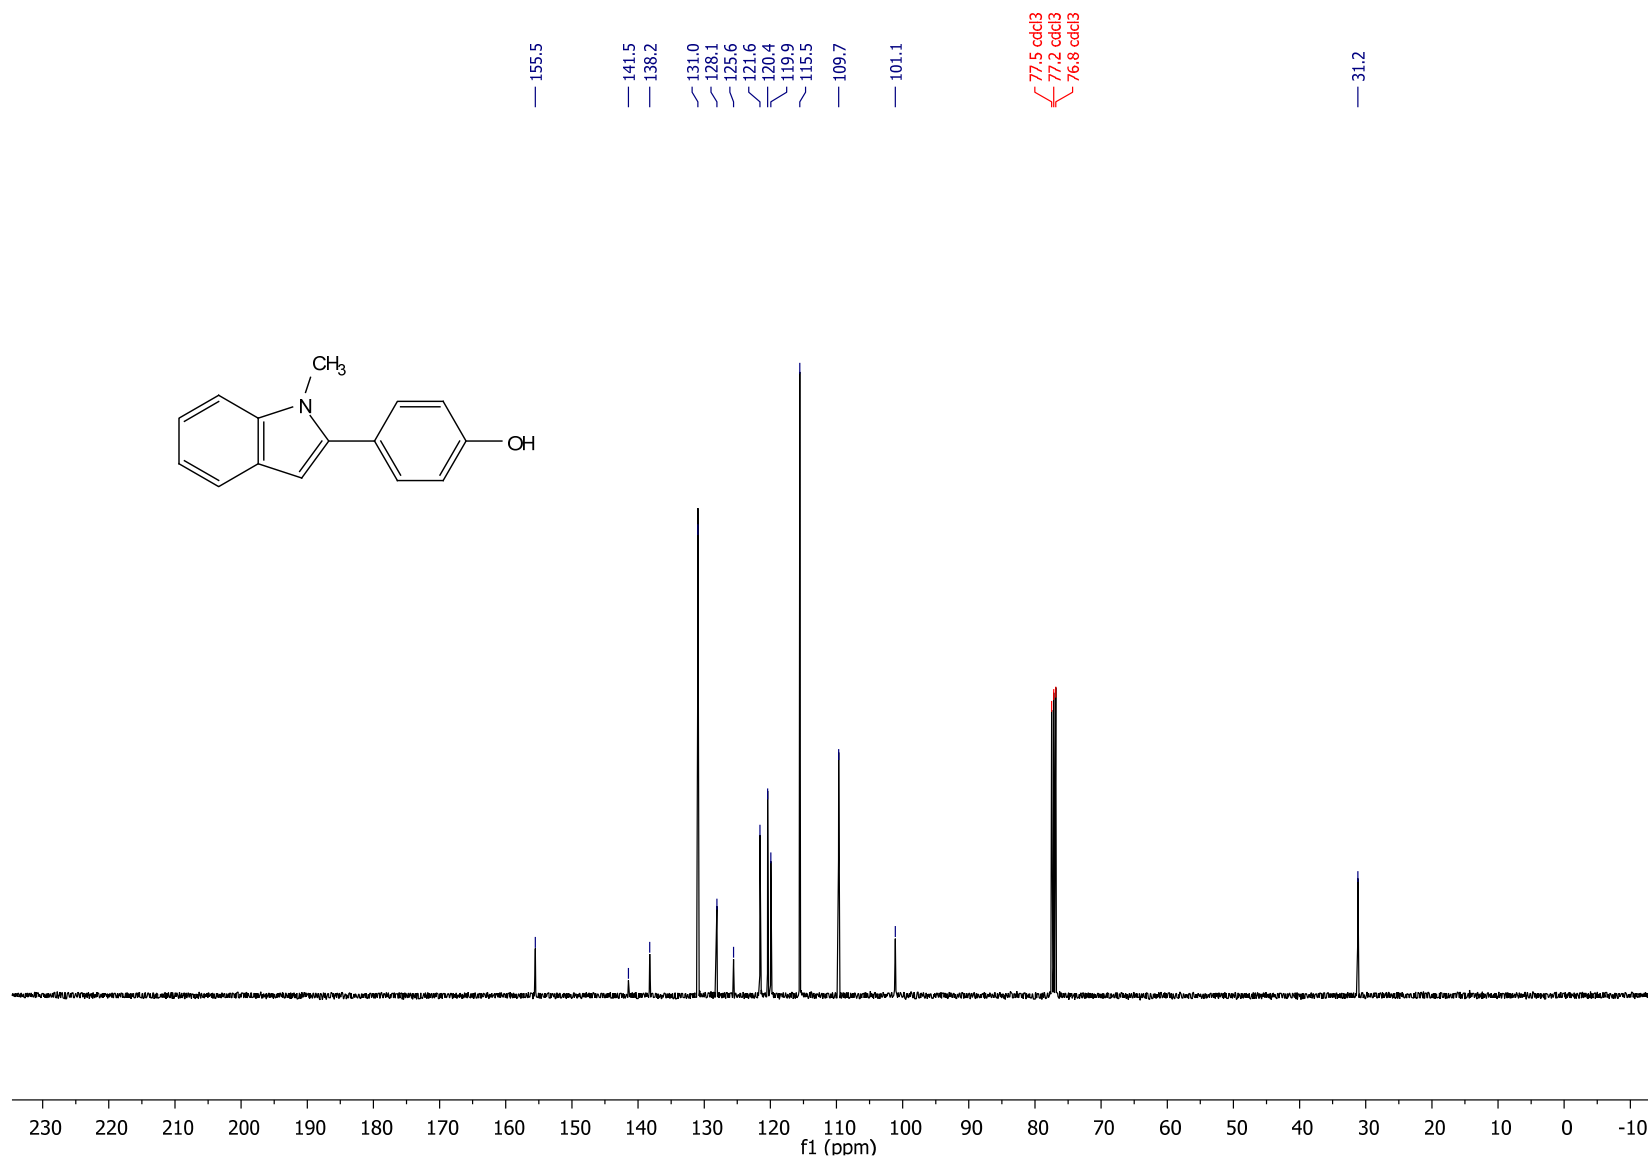

9-ethyl-3-(1'-methyl-1'H-indol-2'-yl)-9H-carbazole (3q)

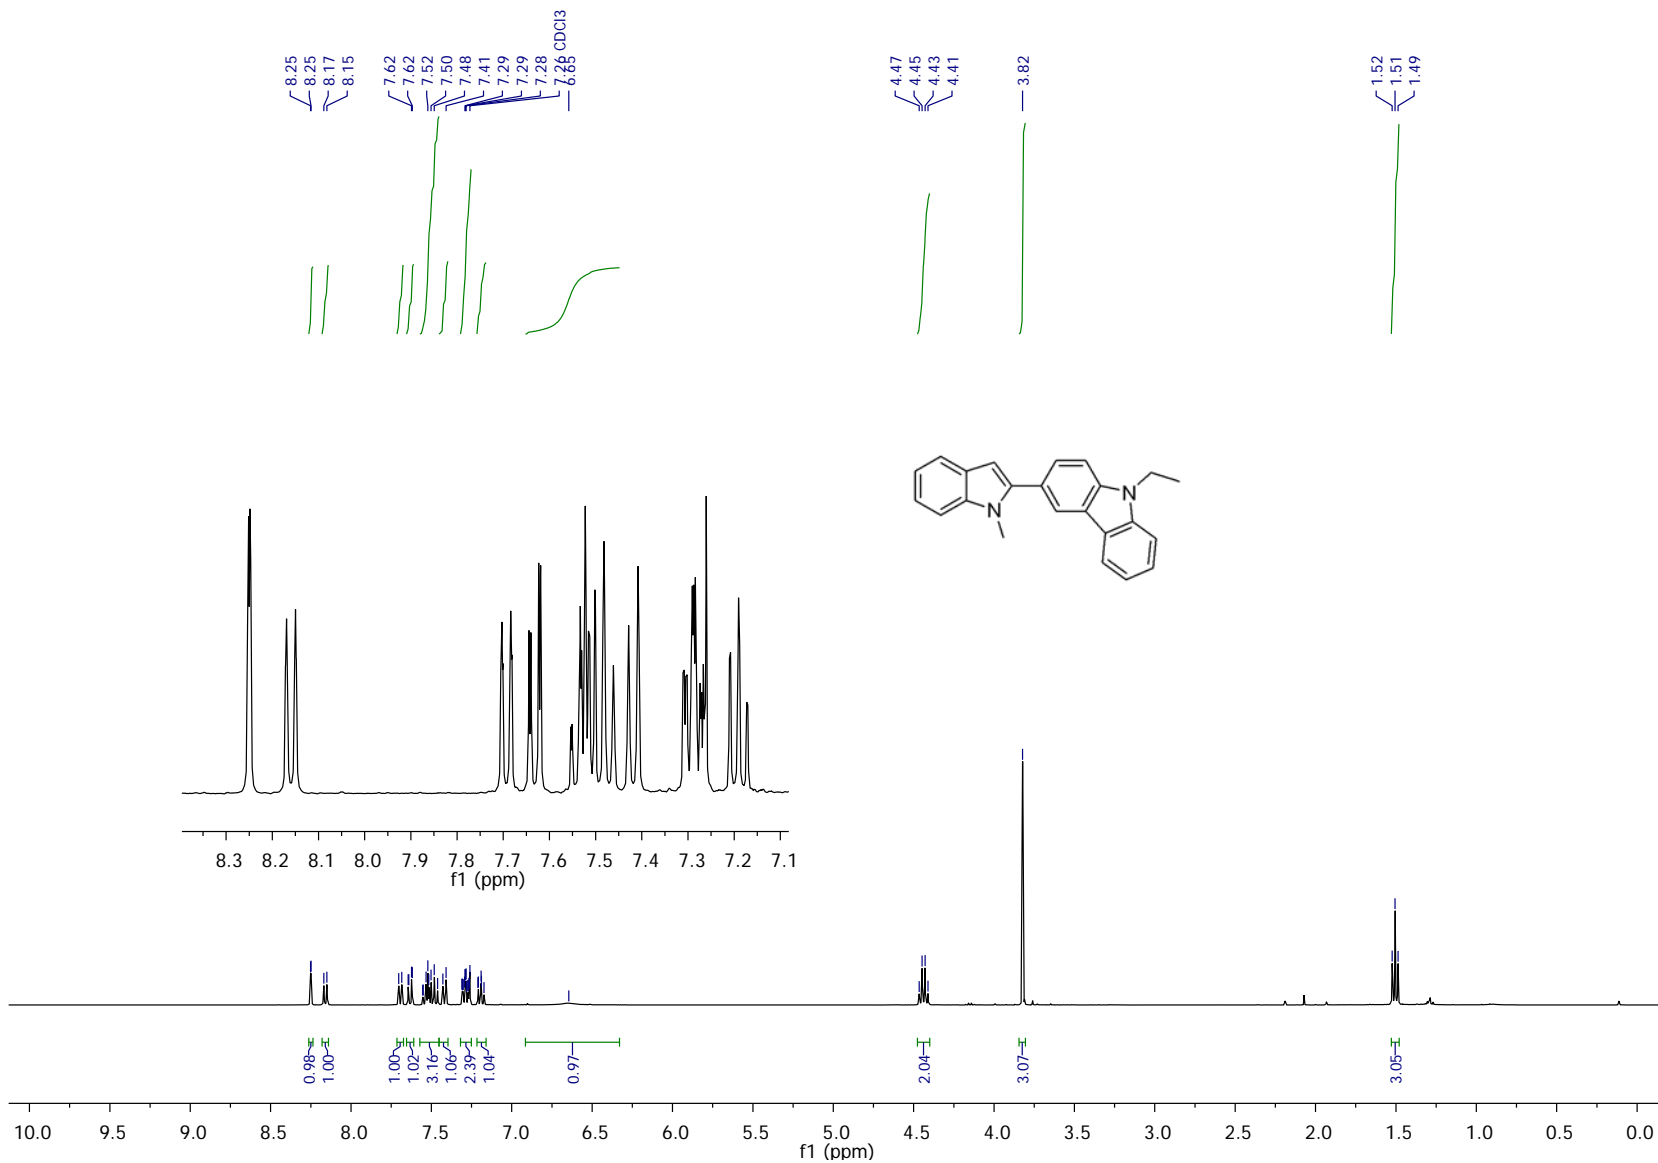

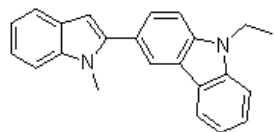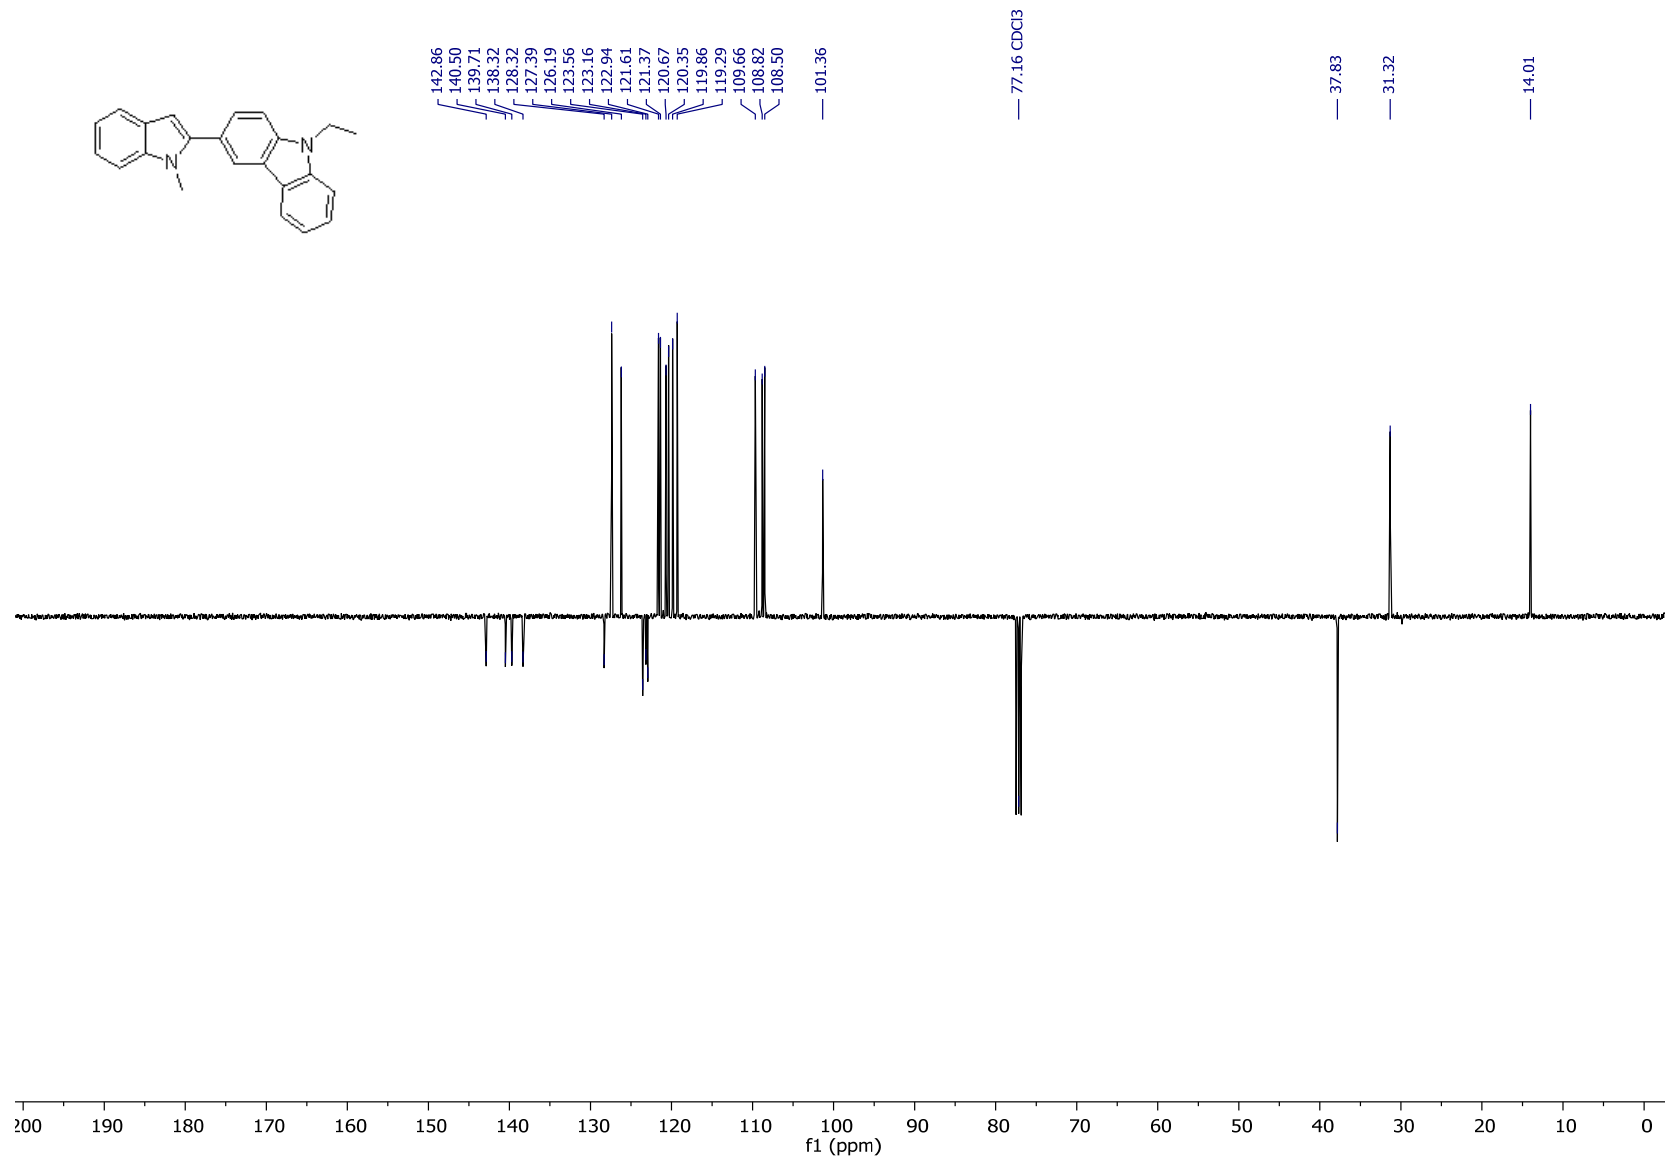

Ethyl 5-(1-methyl-1H-indol-2-yl)benzofuran-2-carboxylate (3r)

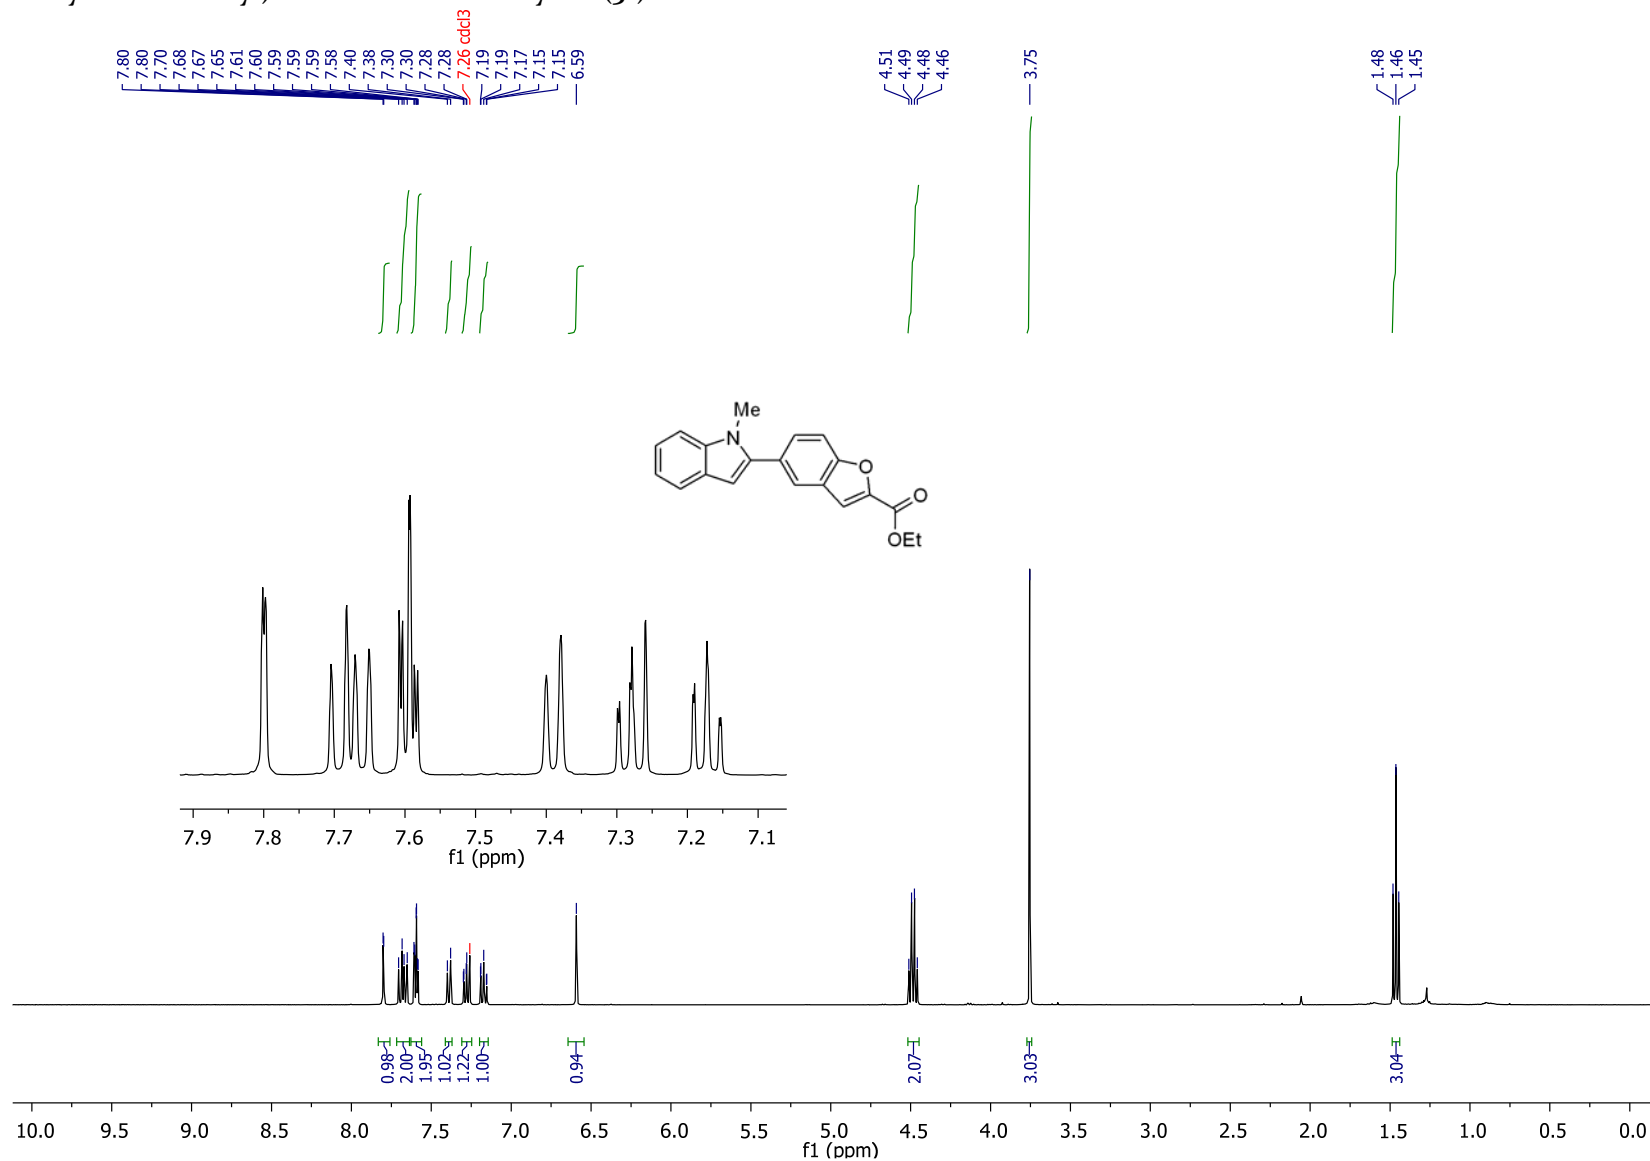



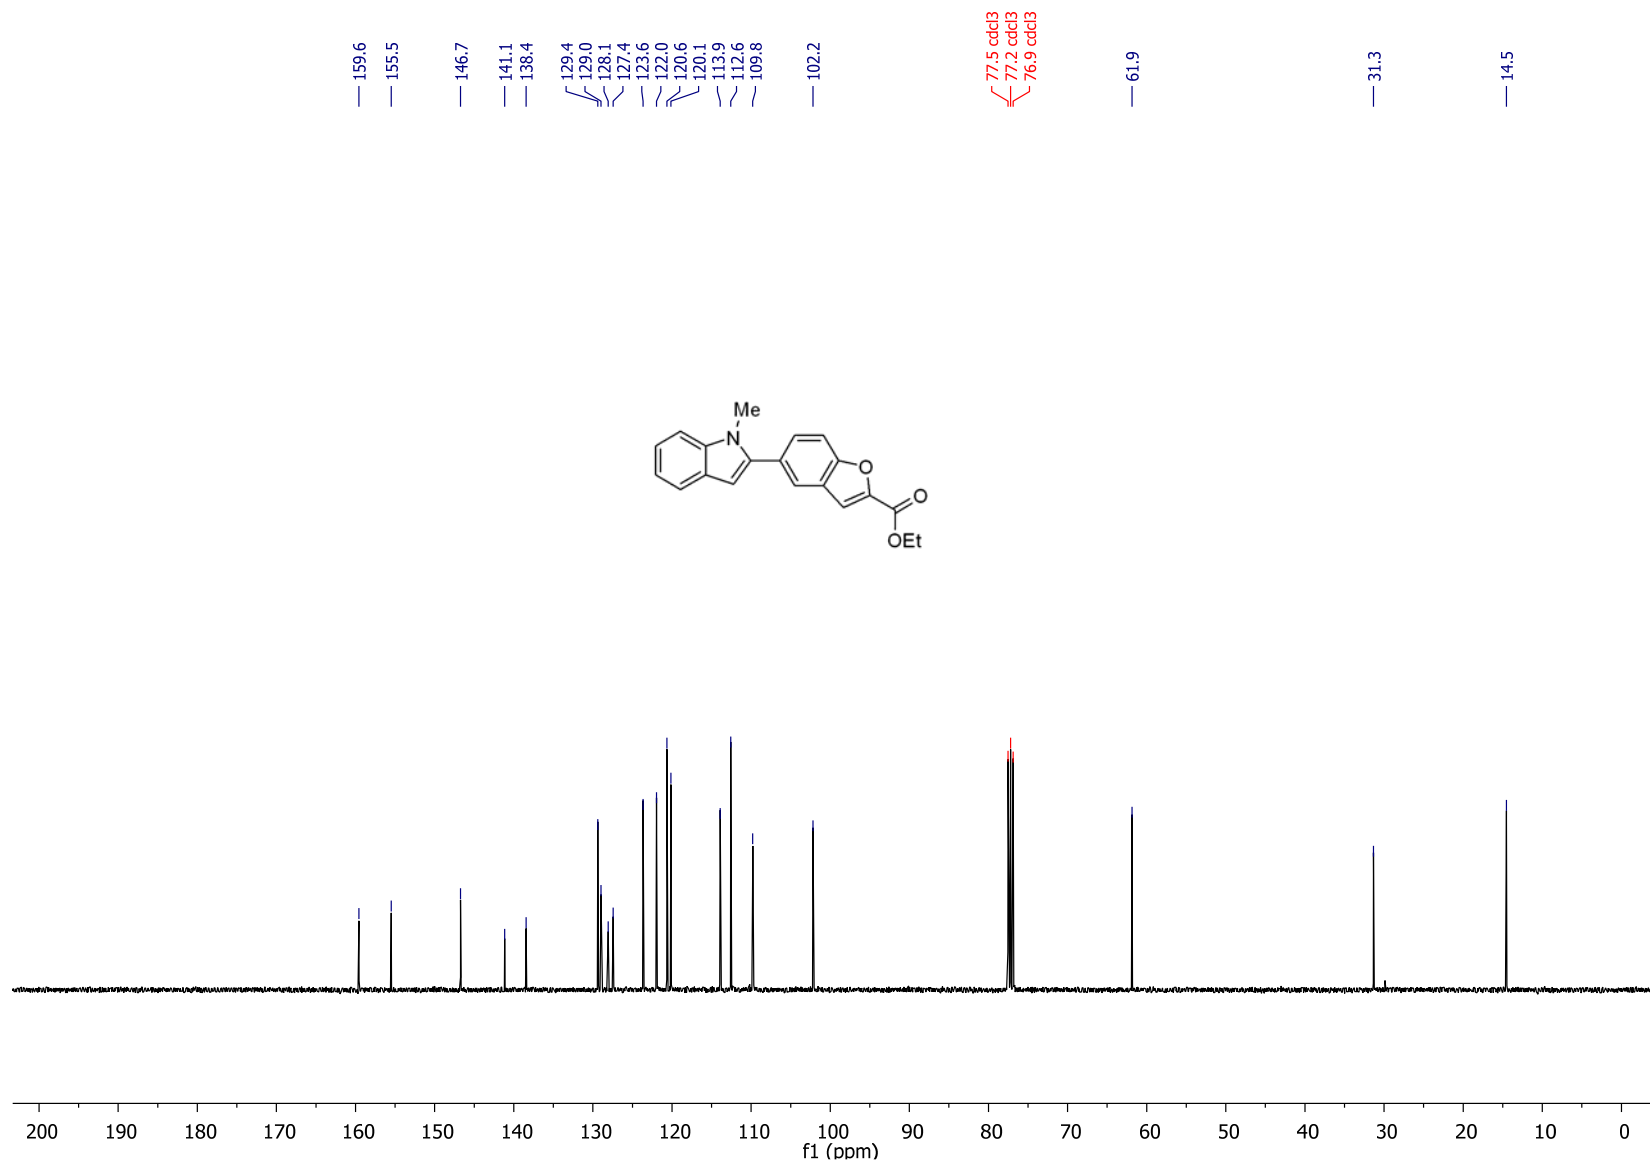

2-(4-fluorophenyl)-1-methyl-1H-indole (3s)

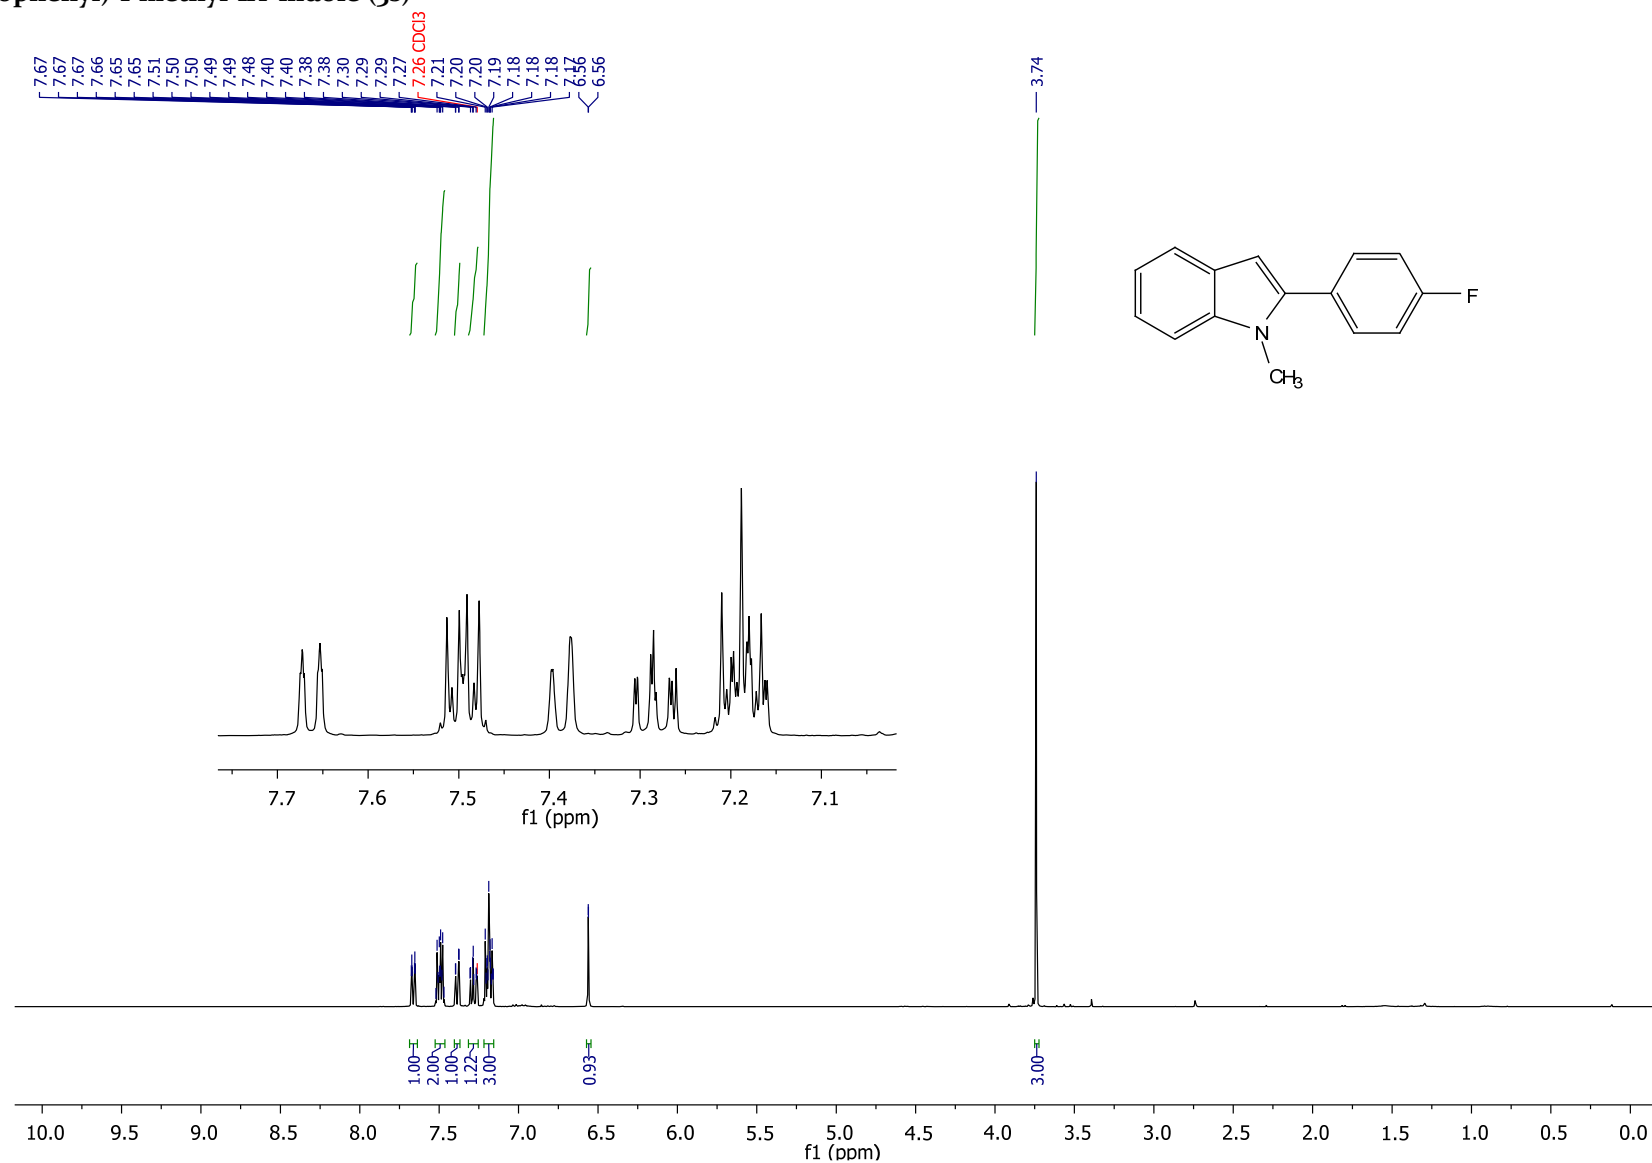

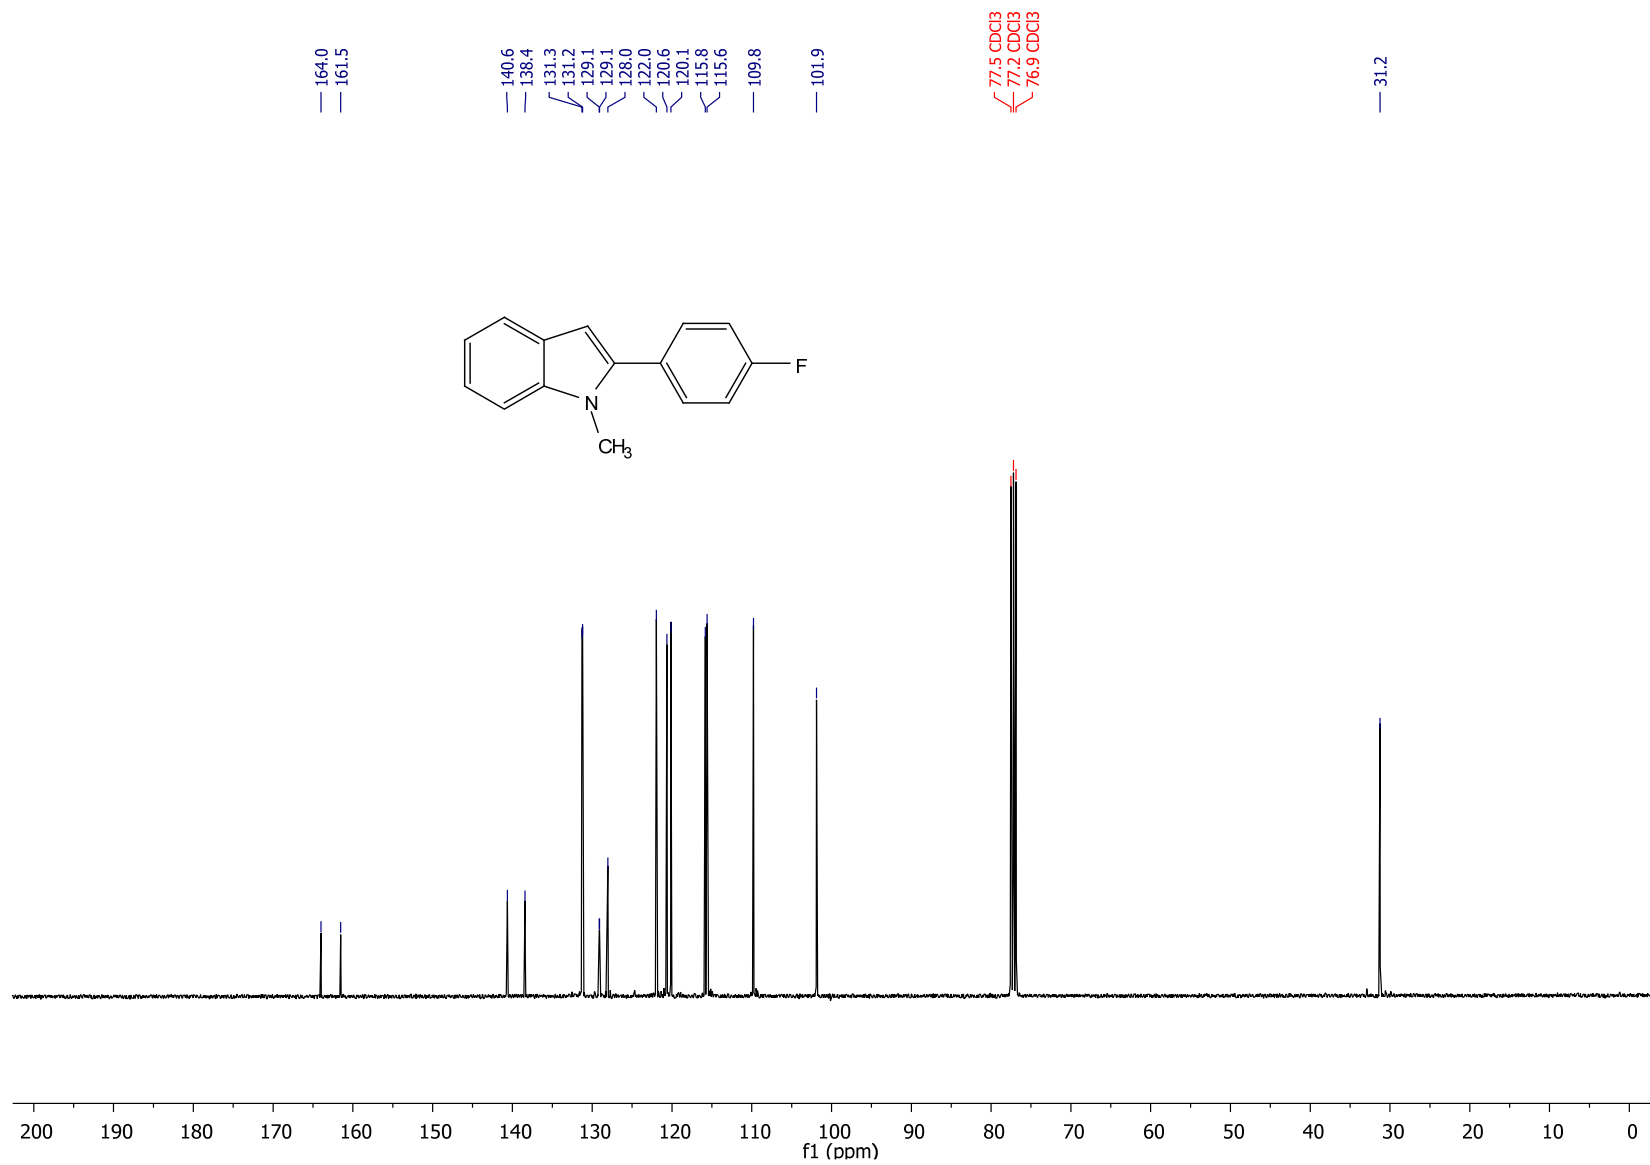

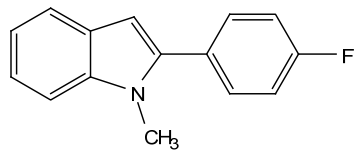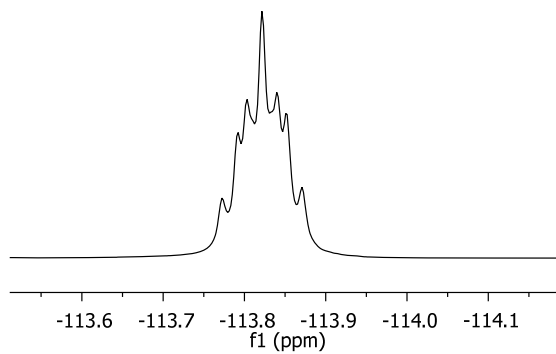

-113.77  
-113.80  
-113.82  
-113.84  
-113.85  
-113.87

1.00

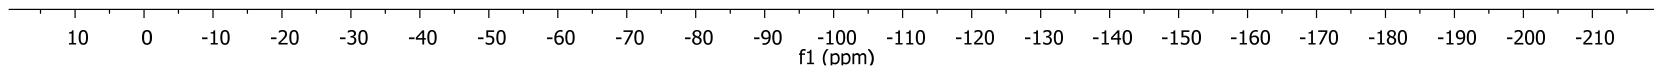

1,3-dimethyl-2-(3-(trifluoromethyl)phenyl)-1H-indole (3t)

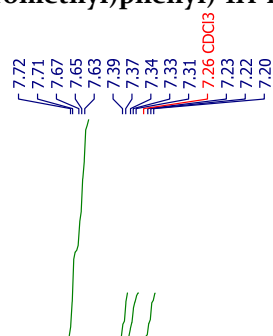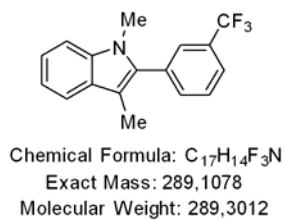

3.65

2.33

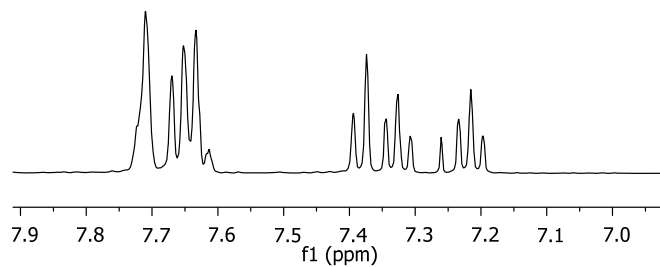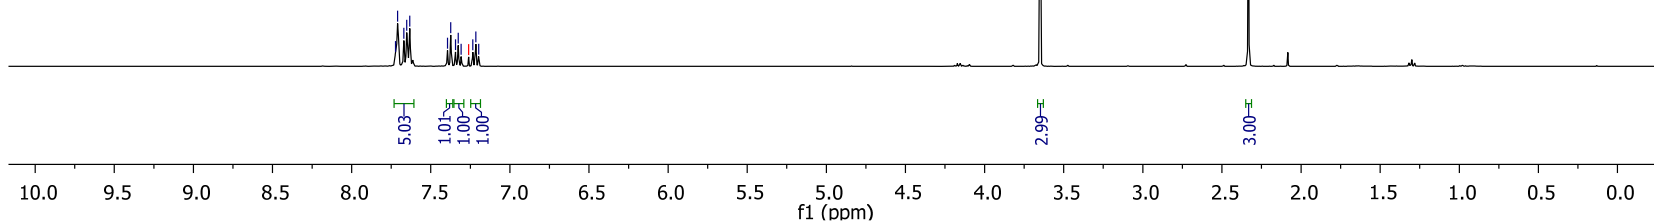

137.6  
136.0  
134.0  
133.2  
131.5  
131.2  
130.9  
130.6  
129.0  
128.5  
128.3  
127.4  
127.4  
127.3  
127.3  
125.5  
124.6  
124.6  
124.5  
122.8  
122.5  
120.1  
119.5  
119.2  
109.7  
109.5

77.5 CDCl3  
77.2 CDCl3  
76.8 CDCl3

31.1

9.4

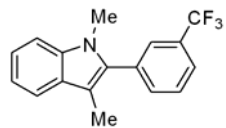

Chemical Formula: C<sub>17</sub>H<sub>14</sub>F<sub>3</sub>N

Exact Mass: 289,1078

Molecular Weight: 289,3012

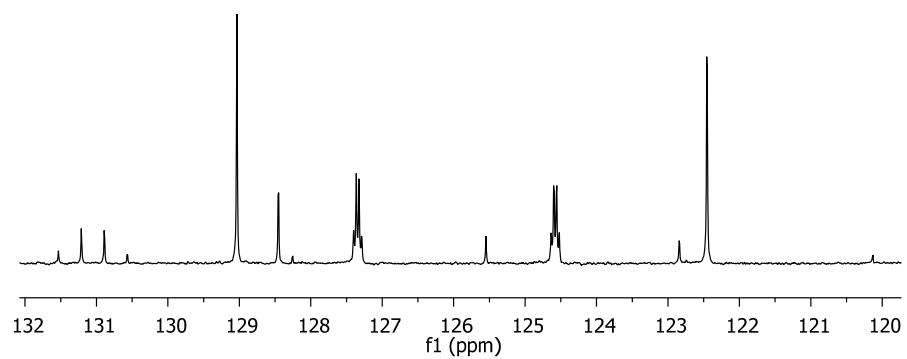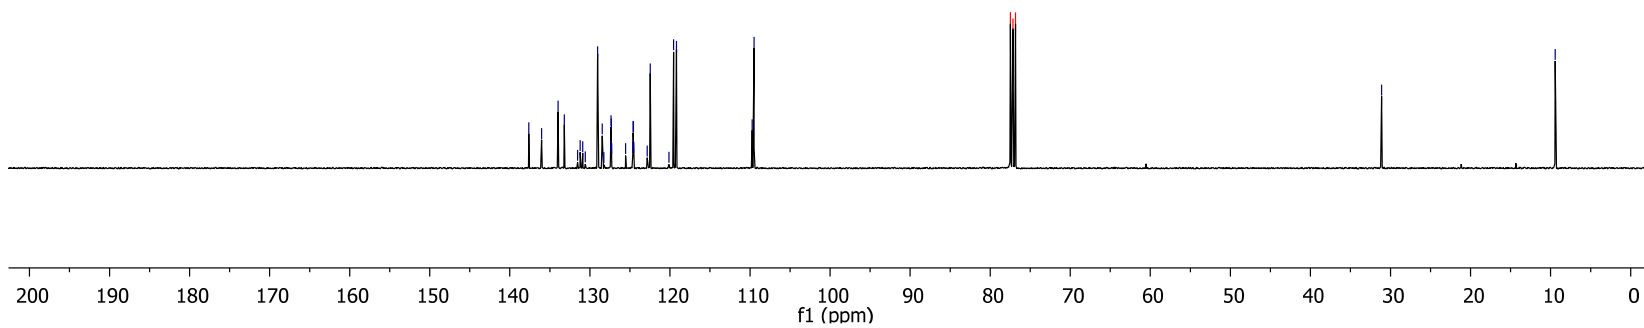

-62.6

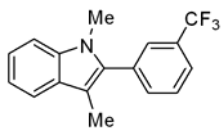

Chemical Formula: C<sub>17</sub>H<sub>14</sub>F<sub>3</sub>N

Exact Mass: 289,1078

Molecular Weight: 289,3012

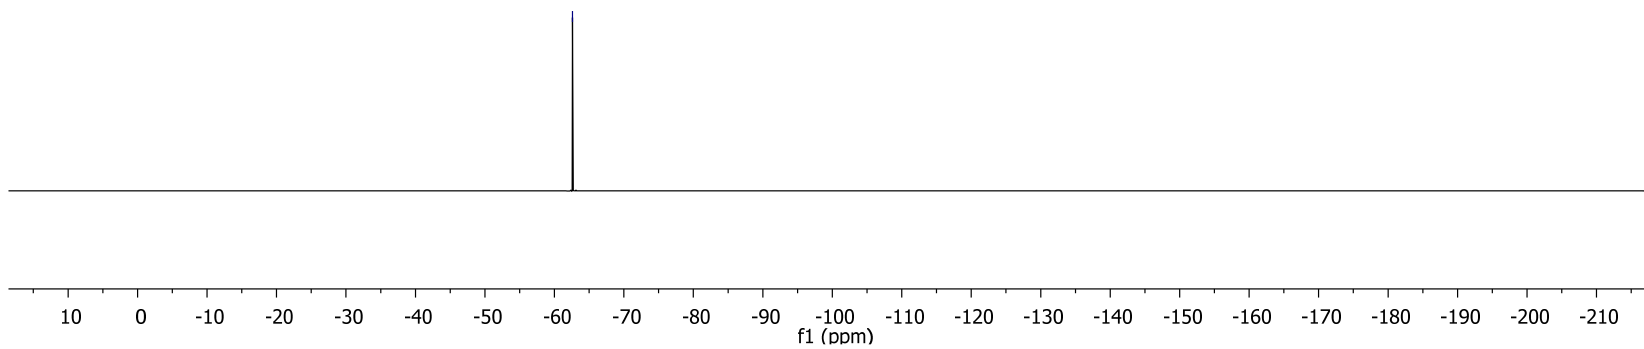

1,3-dimethyl-2-(4-nitrophenyl)-1H-indole (3u)

8.38  
8.35  
7.62  
7.59  
7.58  
7.57  
7.38  
7.36  
7.34  
7.34  
7.32  
7.30  
7.26  
7.21  
7.19  
7.18

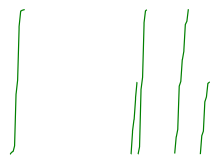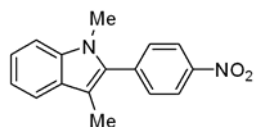

Chemical Formula: C<sub>16</sub>H<sub>14</sub>N<sub>2</sub>O<sub>2</sub>  
Exact Mass: 266,10553  
Molecular Weight: 266,30000

3.66

2.33

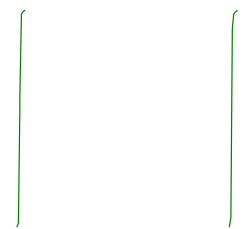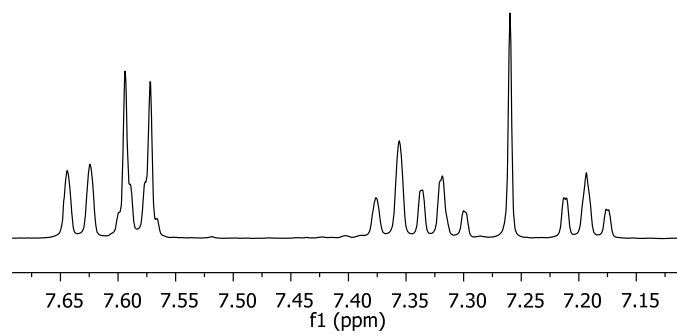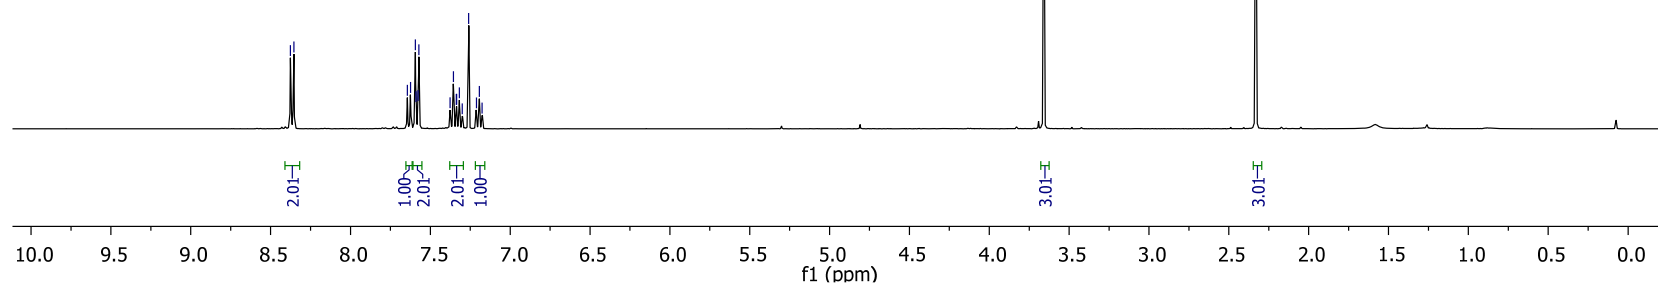



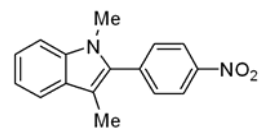

Chemical Formula:  $C_{16}H_{14}N_2O_2$

Exact Mass: 266,10553

Molecular Weight: 266,30000

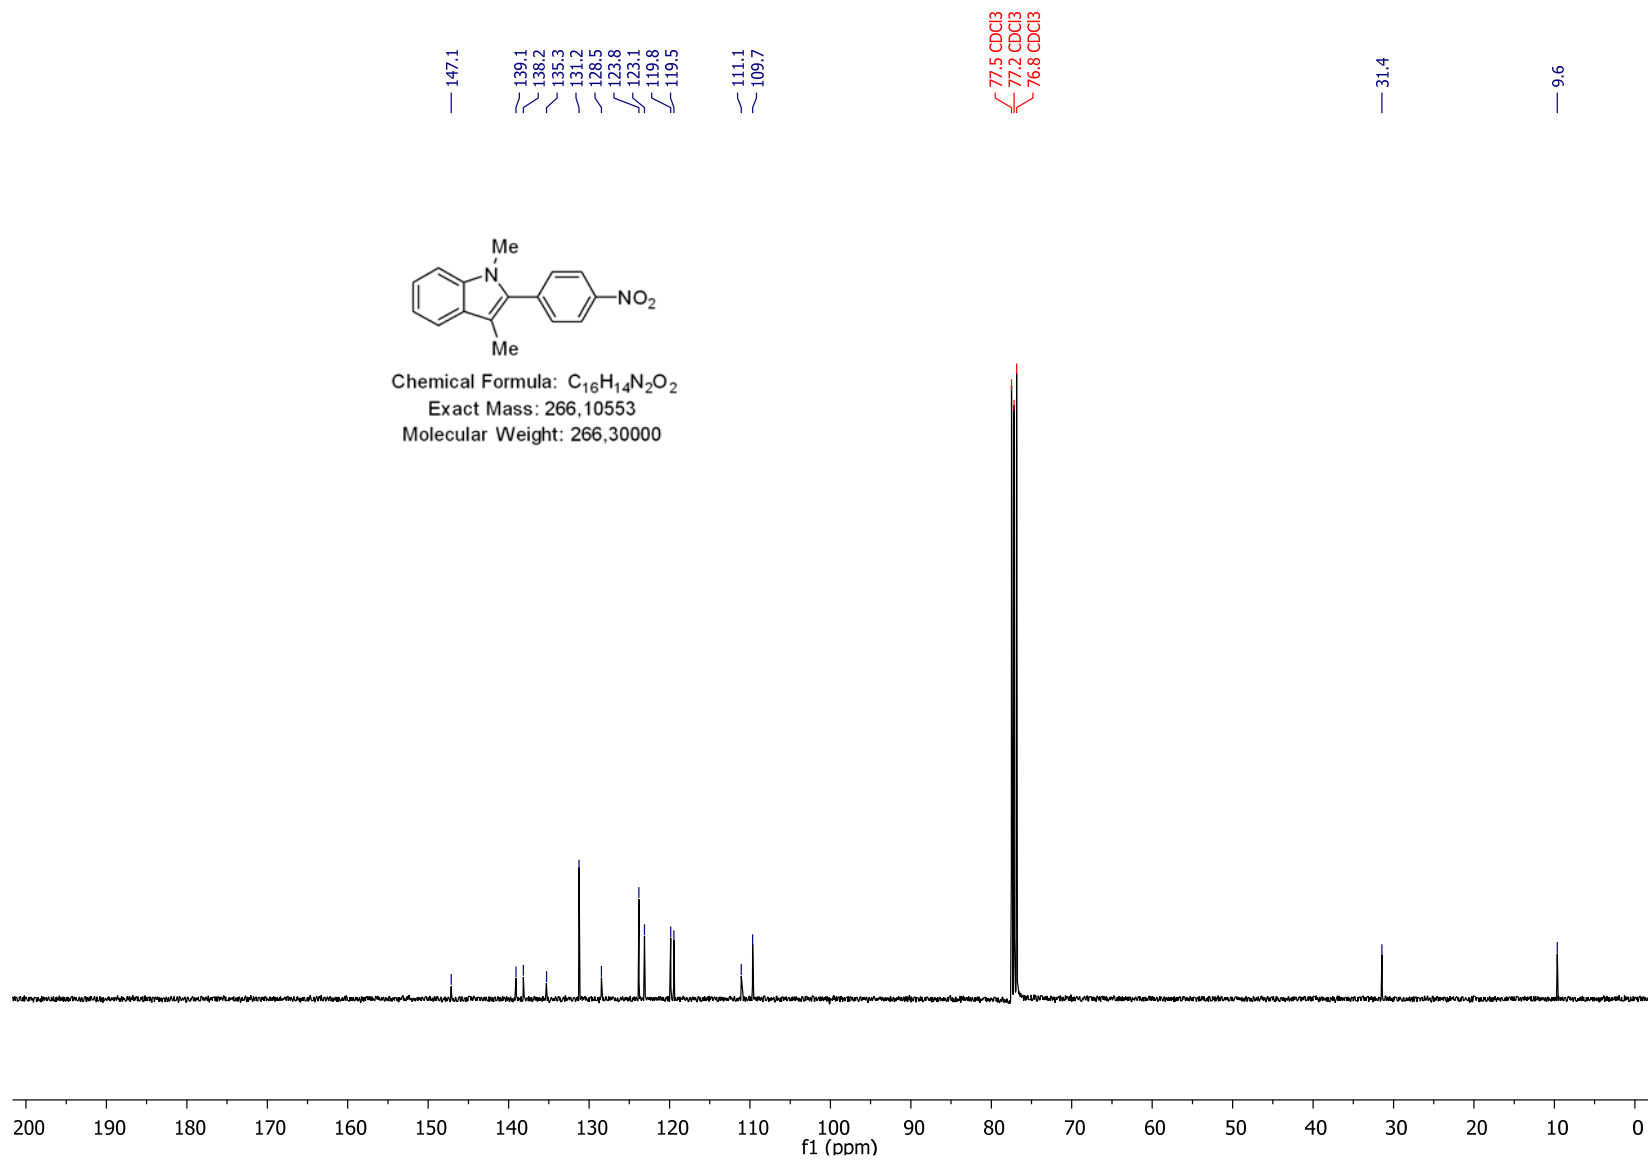

2-(2-chlorophenyl)-1-methyl-1H-indole (3v)

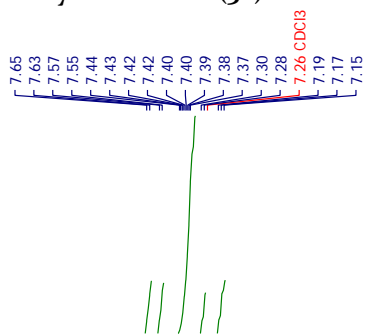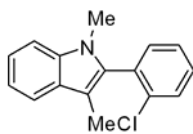

3.53

2.20

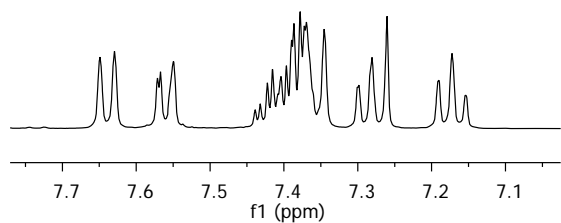

1.00  
0.97  
4.16  
0.78  
1.02

3.01

3.00

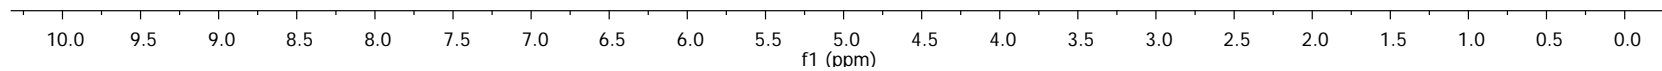

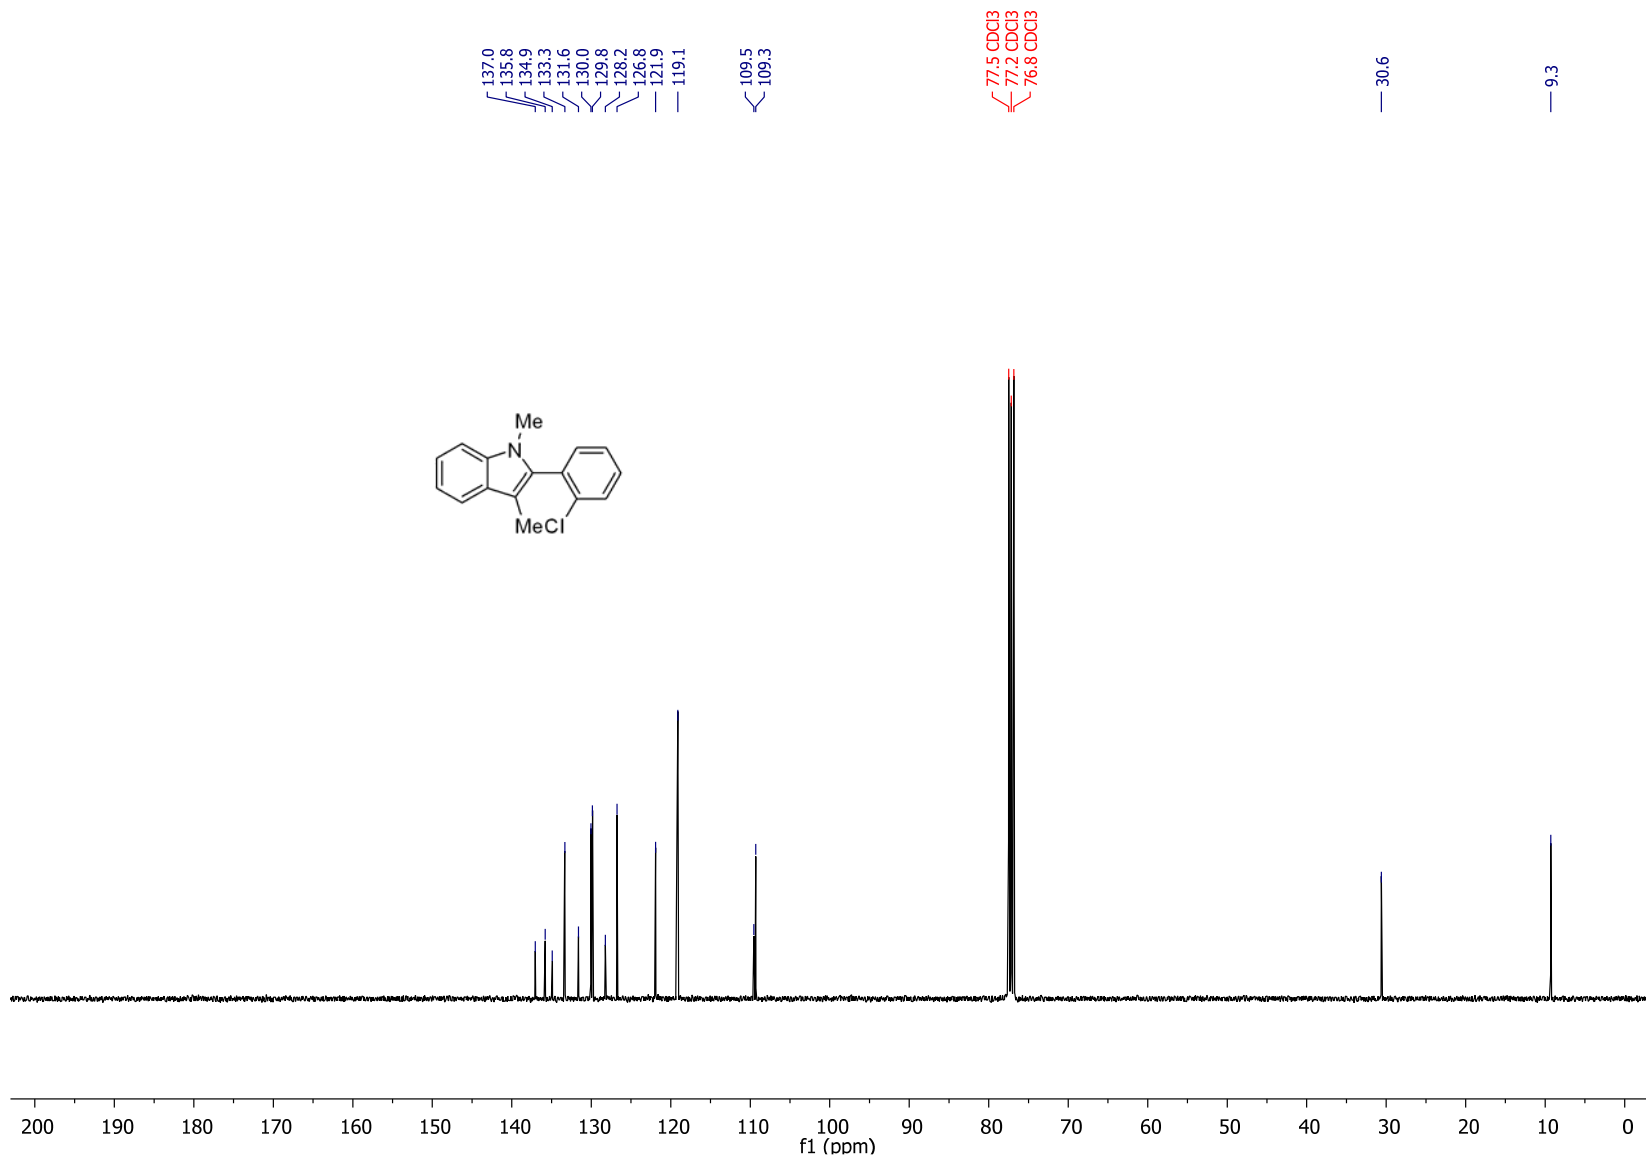

2-(3-iodophenyl)-1-methyl-1H-indole (3w)

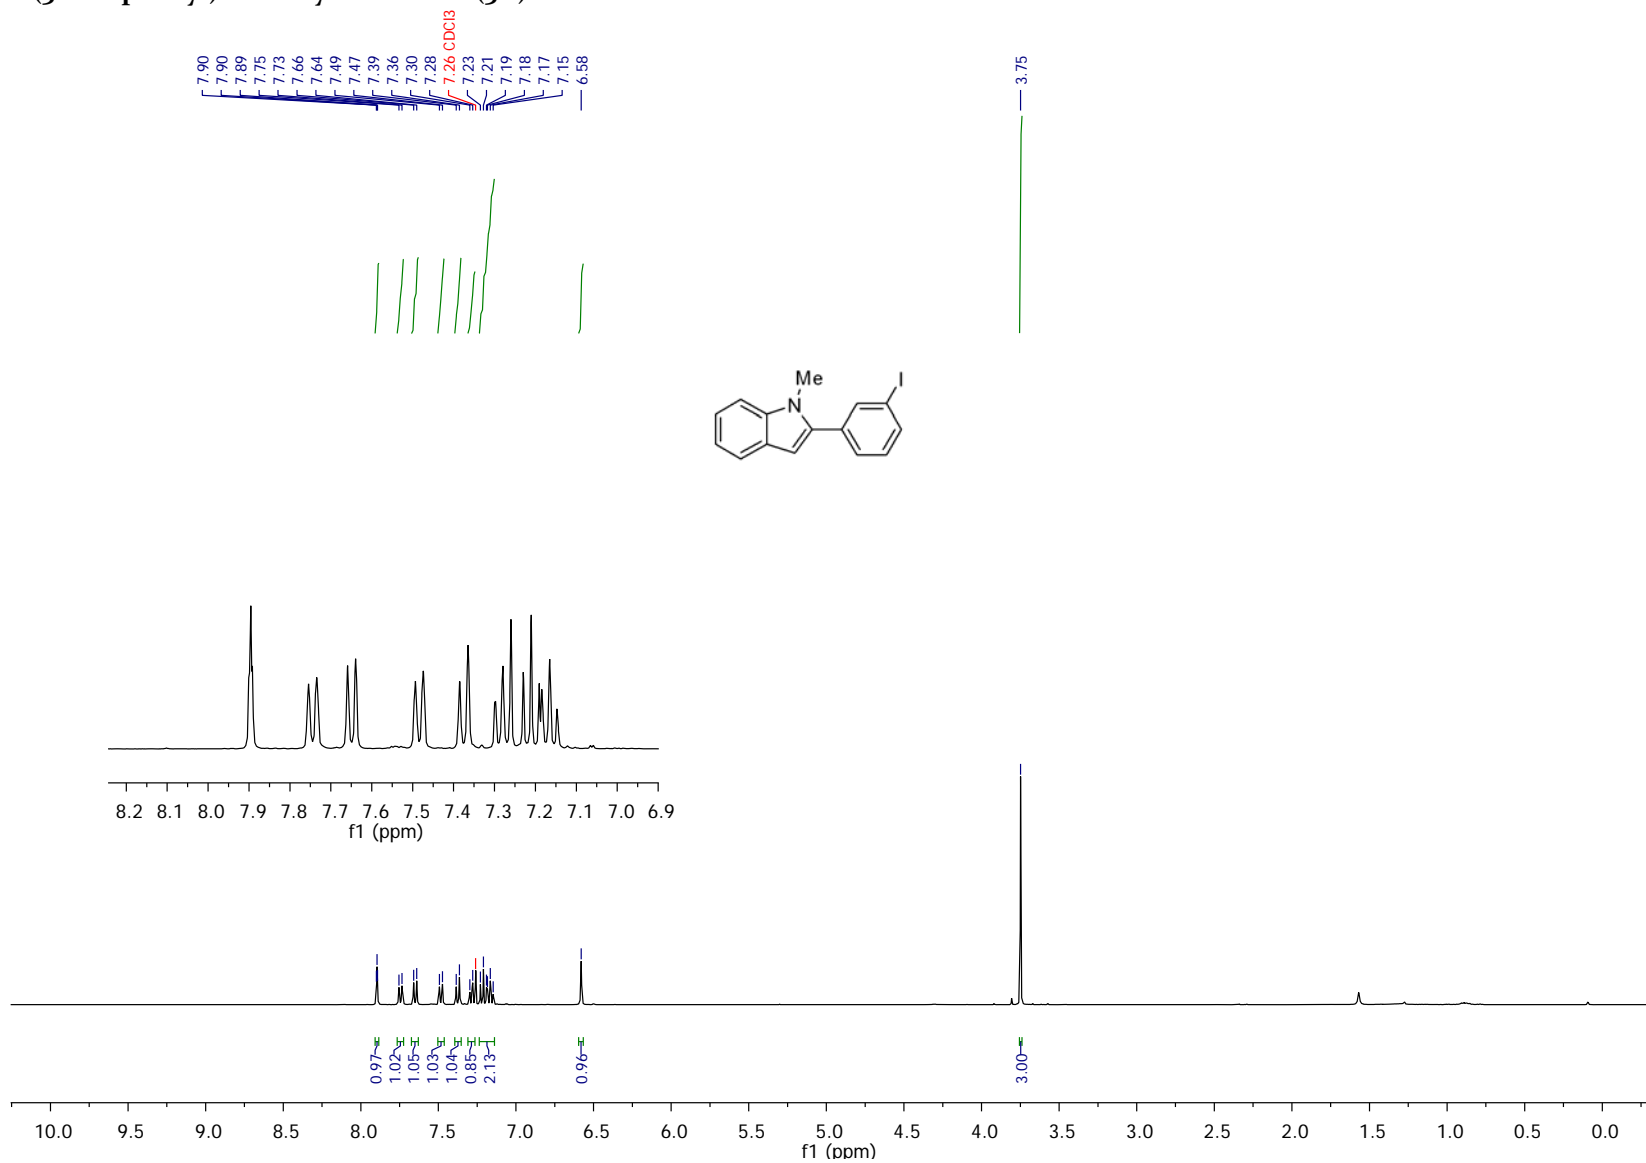

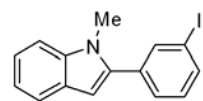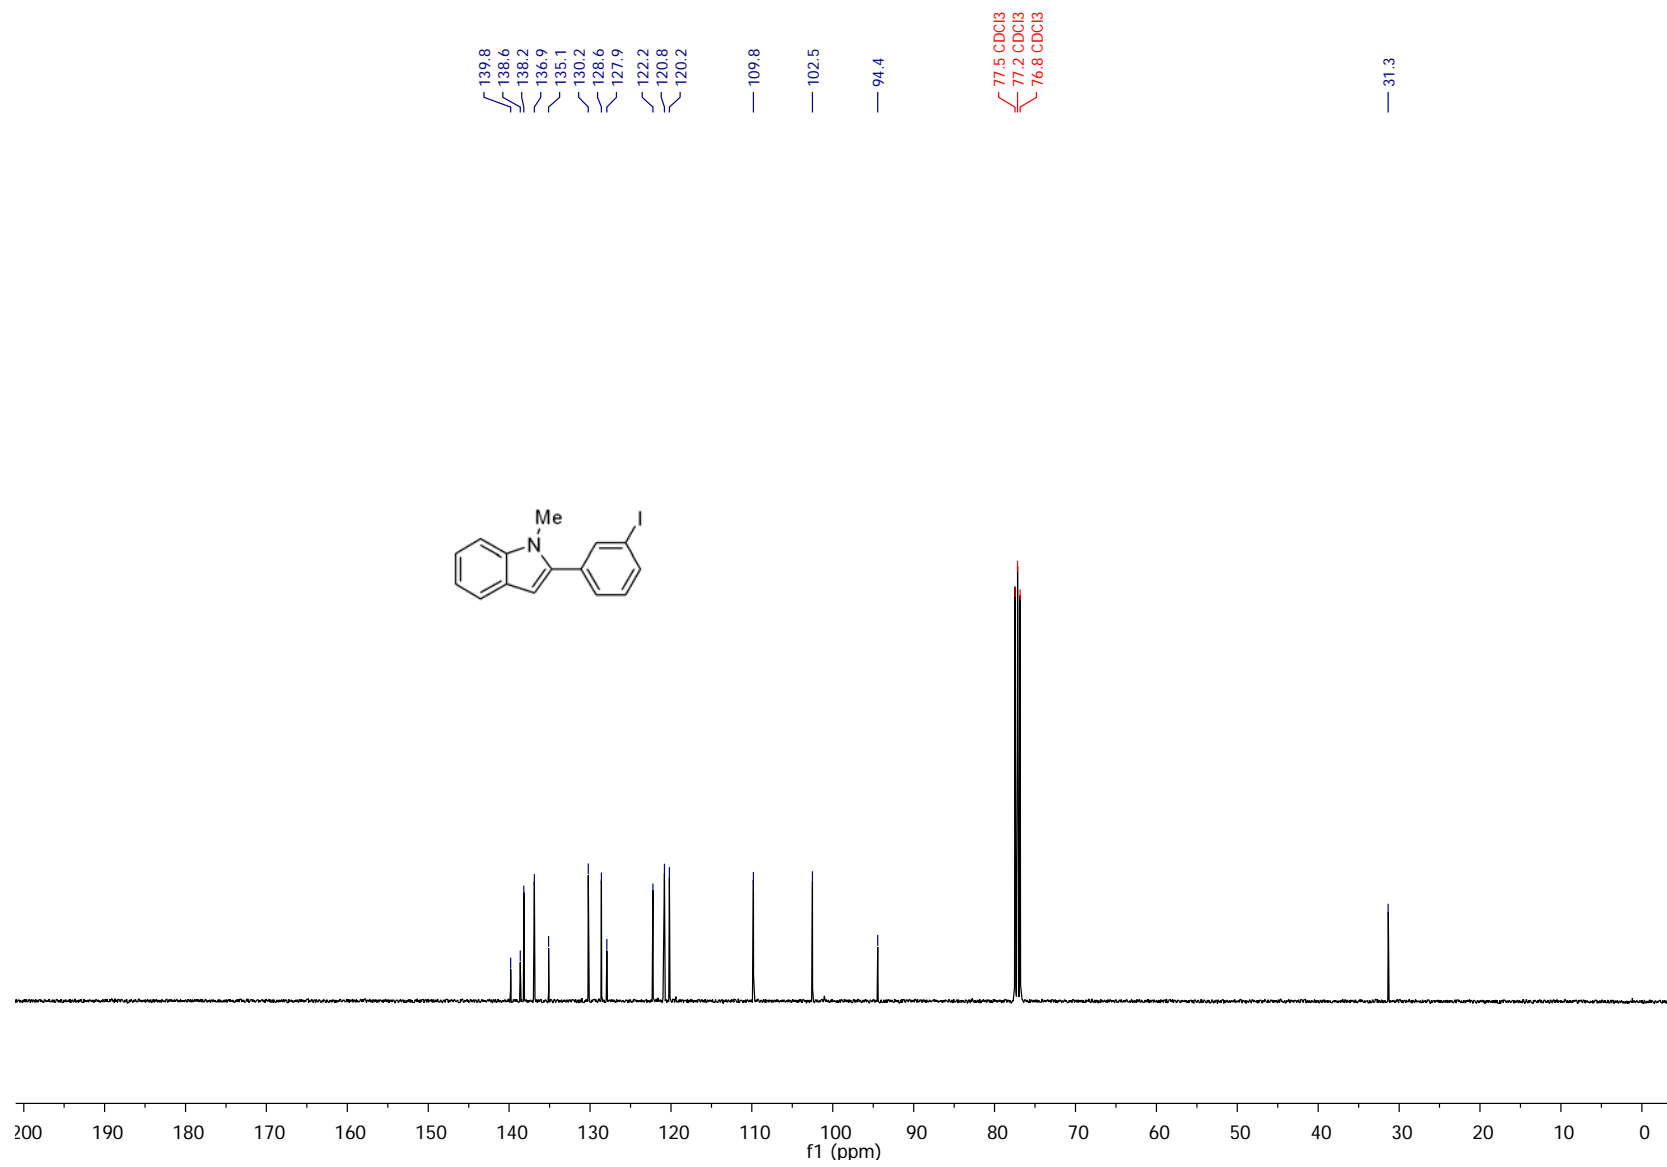

2-(4-bromophenyl)-1,3-dimethyl-1H-indole (3x)

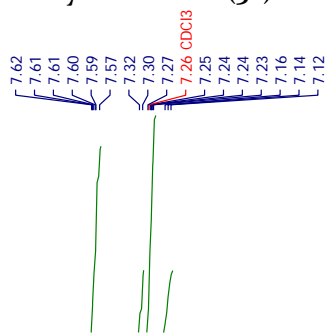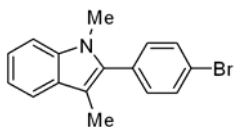

Chemical Formula: C<sub>16</sub>H<sub>14</sub>BrN  
Exact Mass: 299.03096  
Molecular Weight: 300.19900

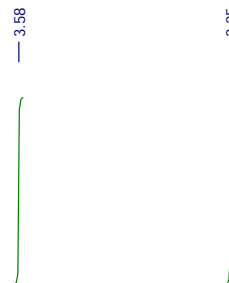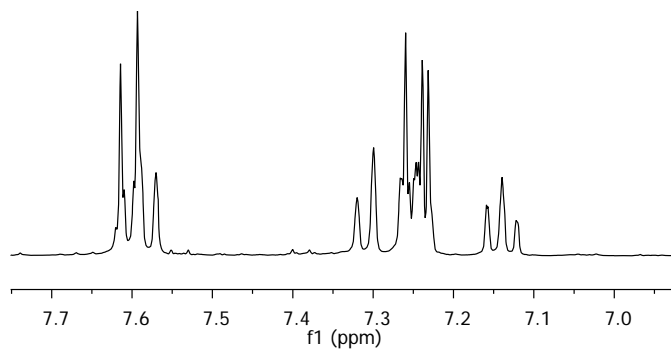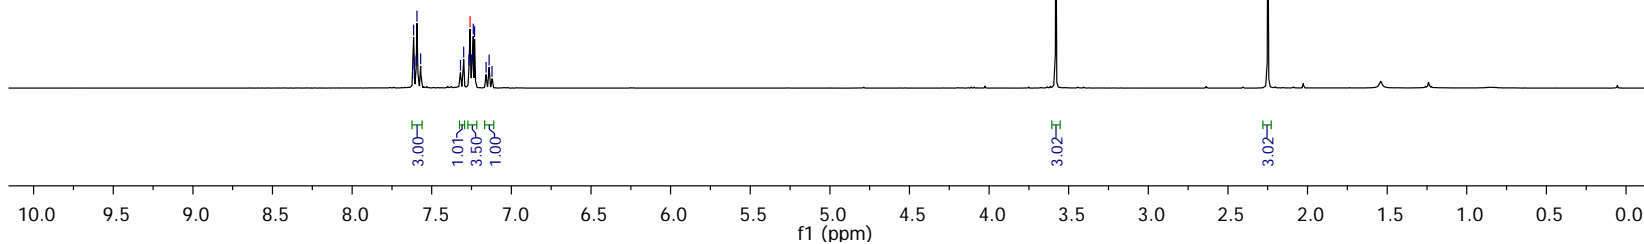

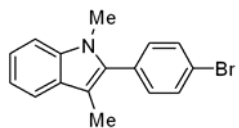

Chemical Formula: C<sub>16</sub>H<sub>14</sub>BrN  
Exact Mass: 299,03096  
Molecular Weight: 300,19900

137.5  
136.5  
132.3  
131.7  
131.2  
128.5  
122.2  
122.2  
119.4  
119.0  
109.4  
109.2

77.5 CDCl<sub>3</sub>  
77.2 CDCl<sub>3</sub>  
76.8 CDCl<sub>3</sub>

31.1

9.5

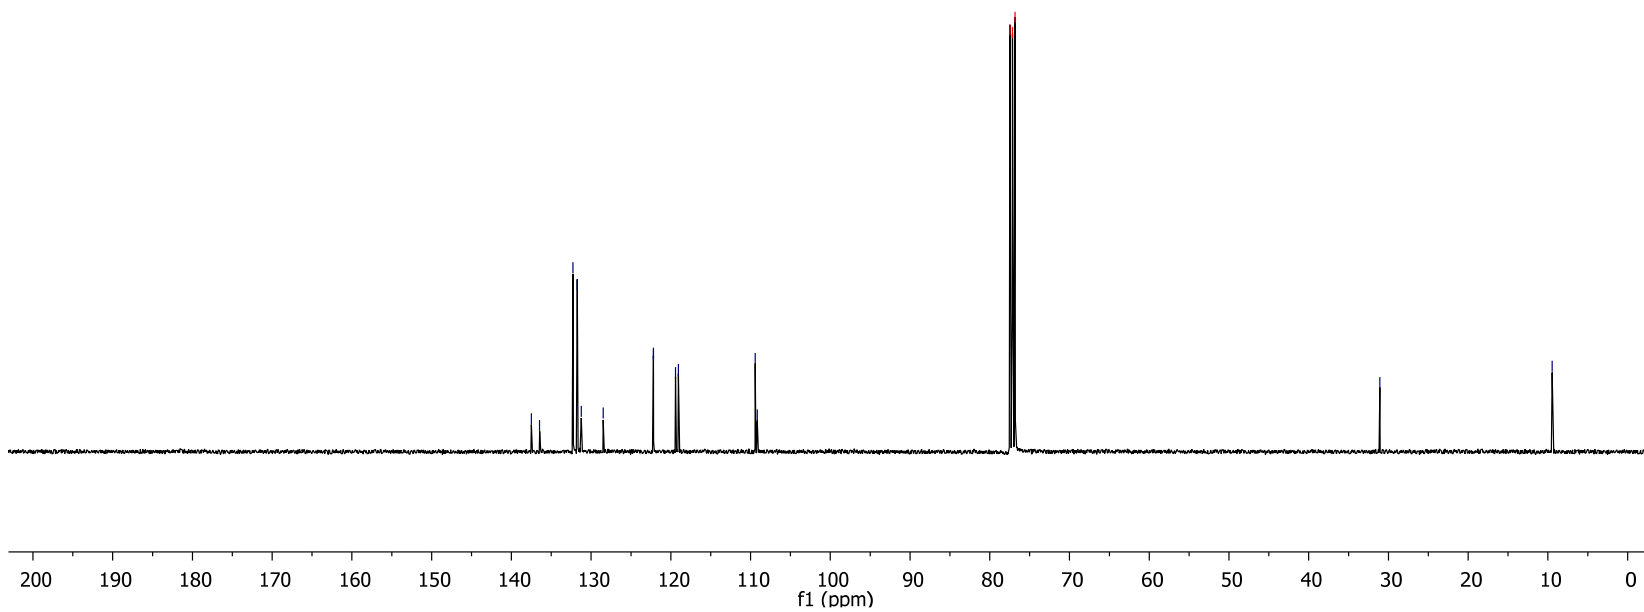

1-(4-(1-methyl-1H-indol-2-yl)phenyl)ethan-1-one (3ya)

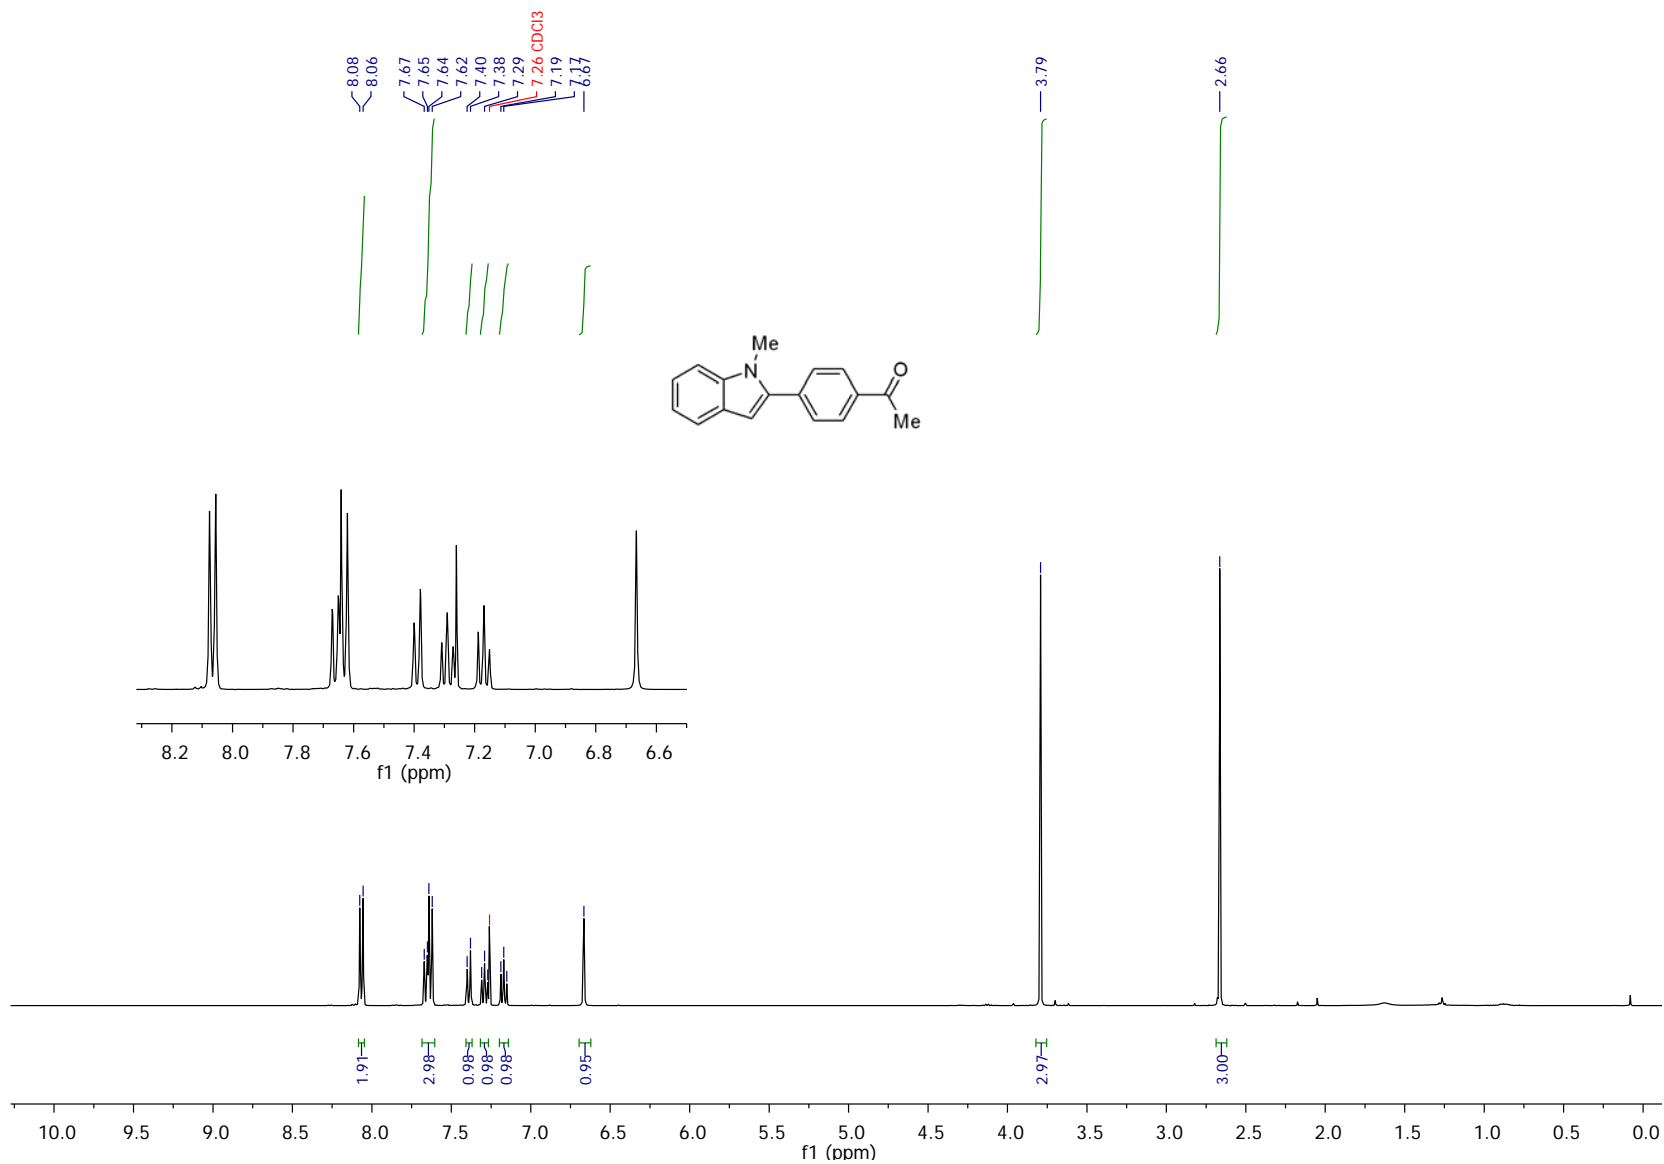



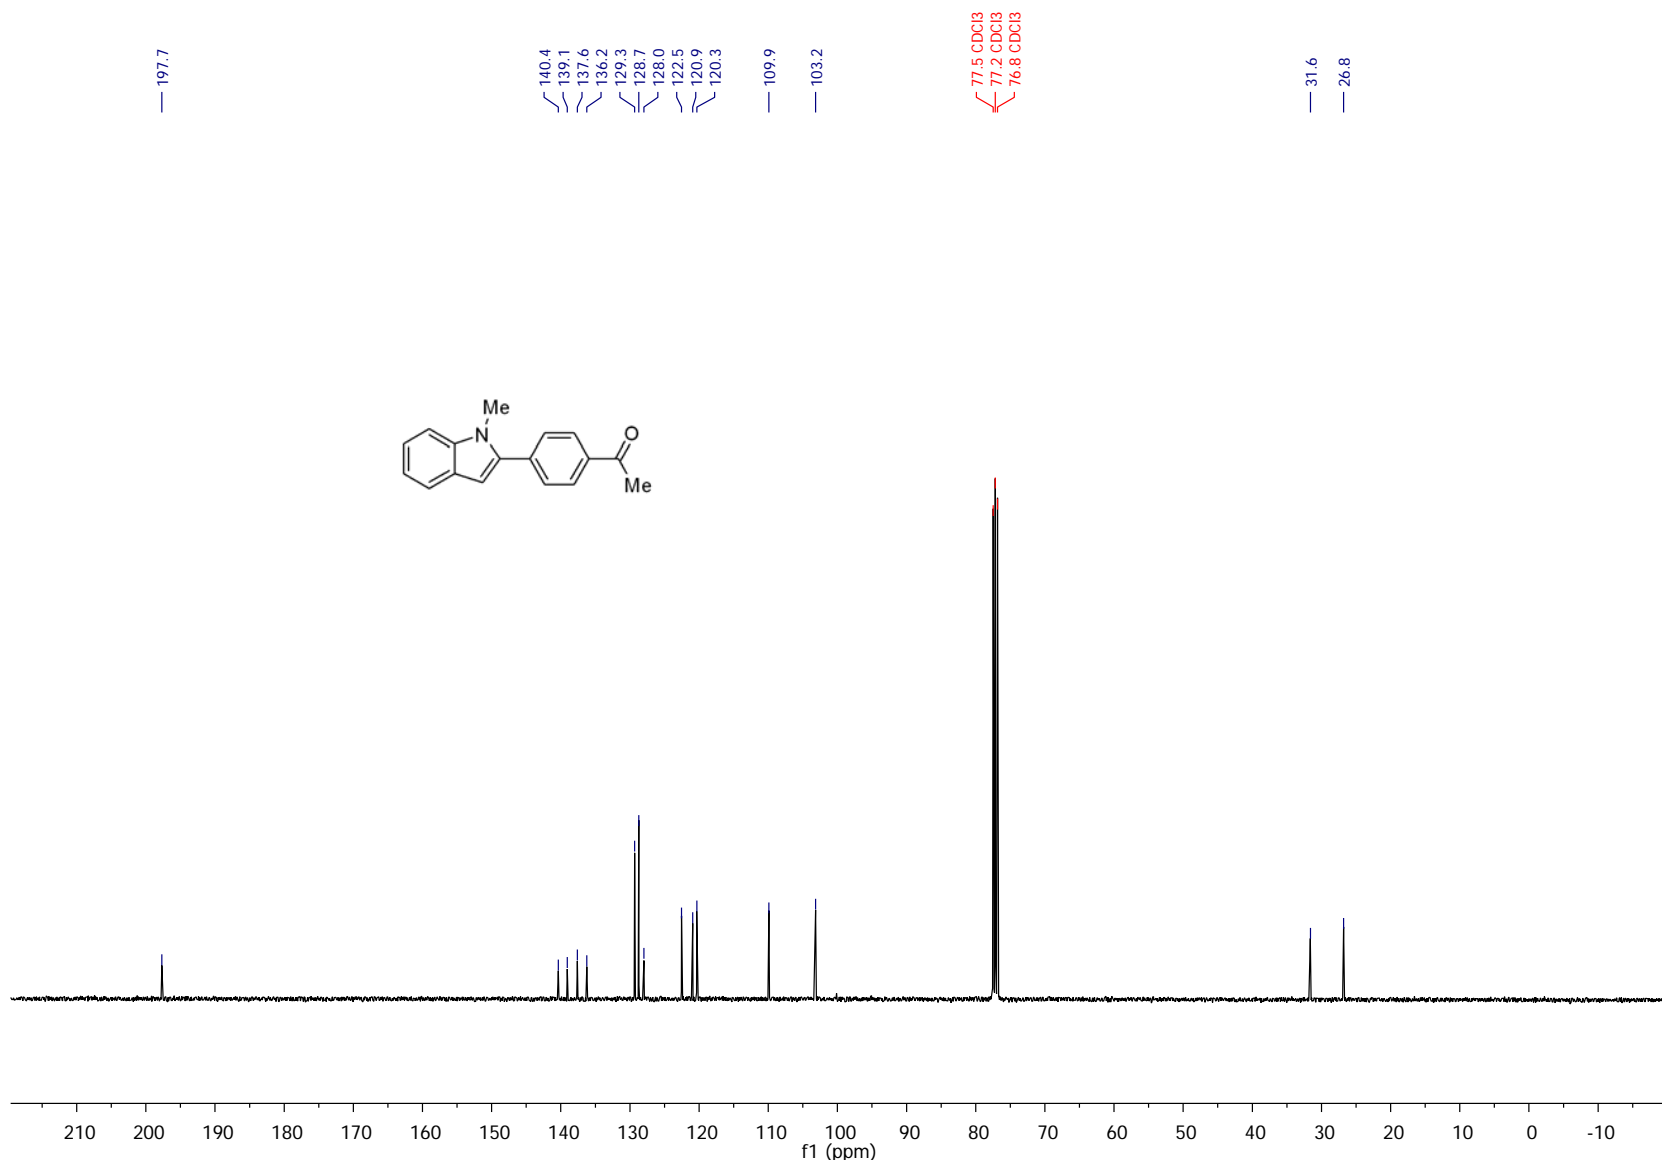

1-(4-(1,3-dimethyl-1H-indol-2-yl)phenyl)ethan-1-one (3y)

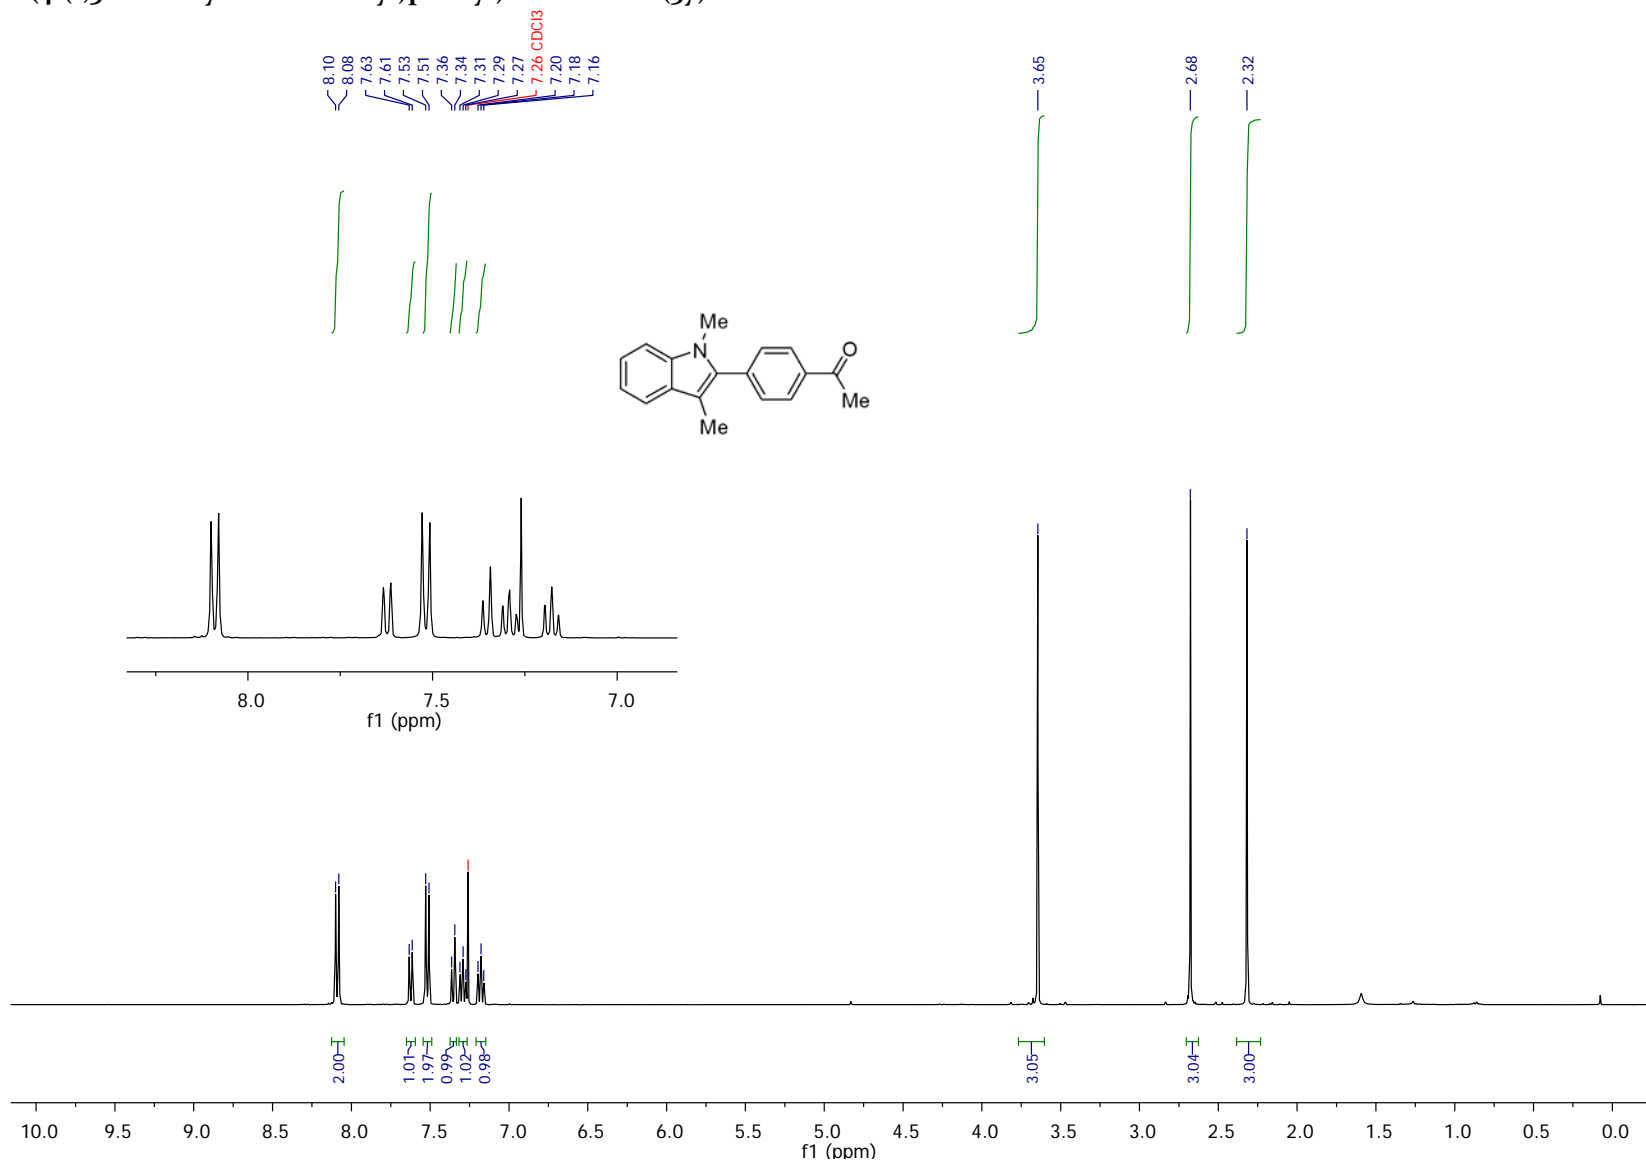

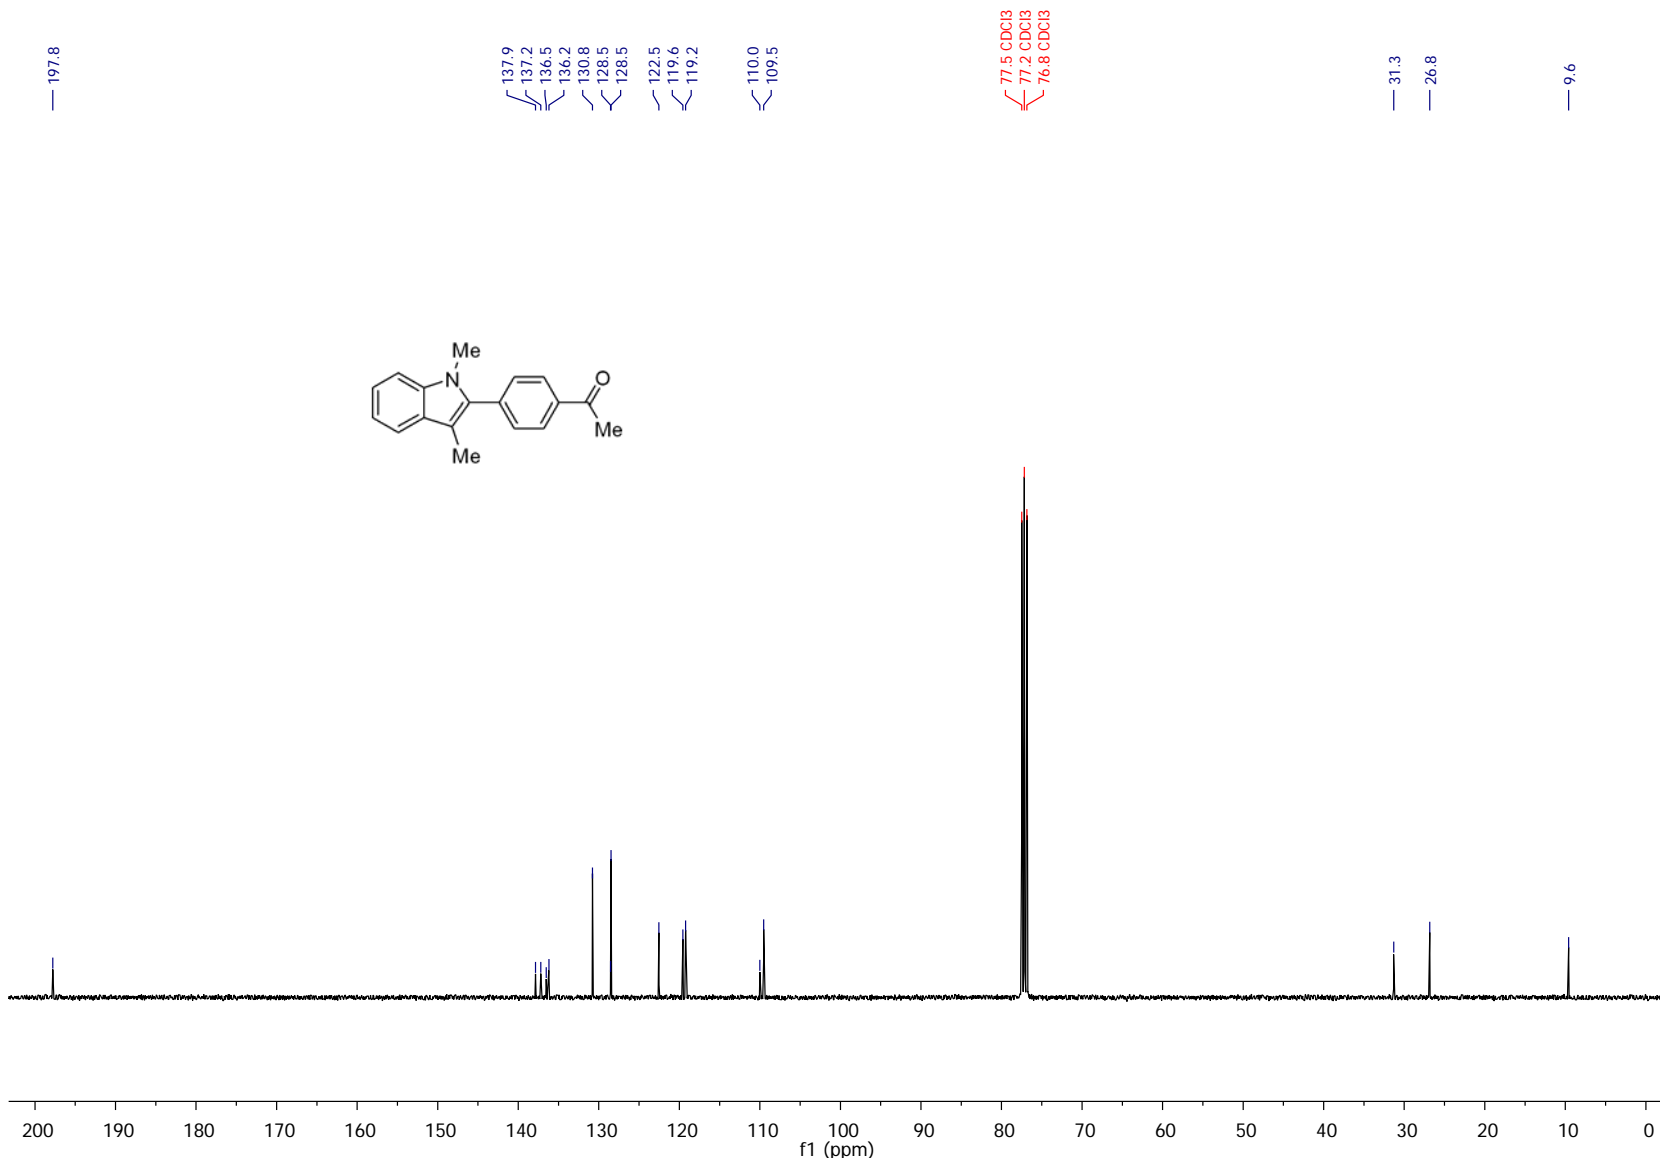

2-(*o*-tolyl)-1*H*-indole (4a)

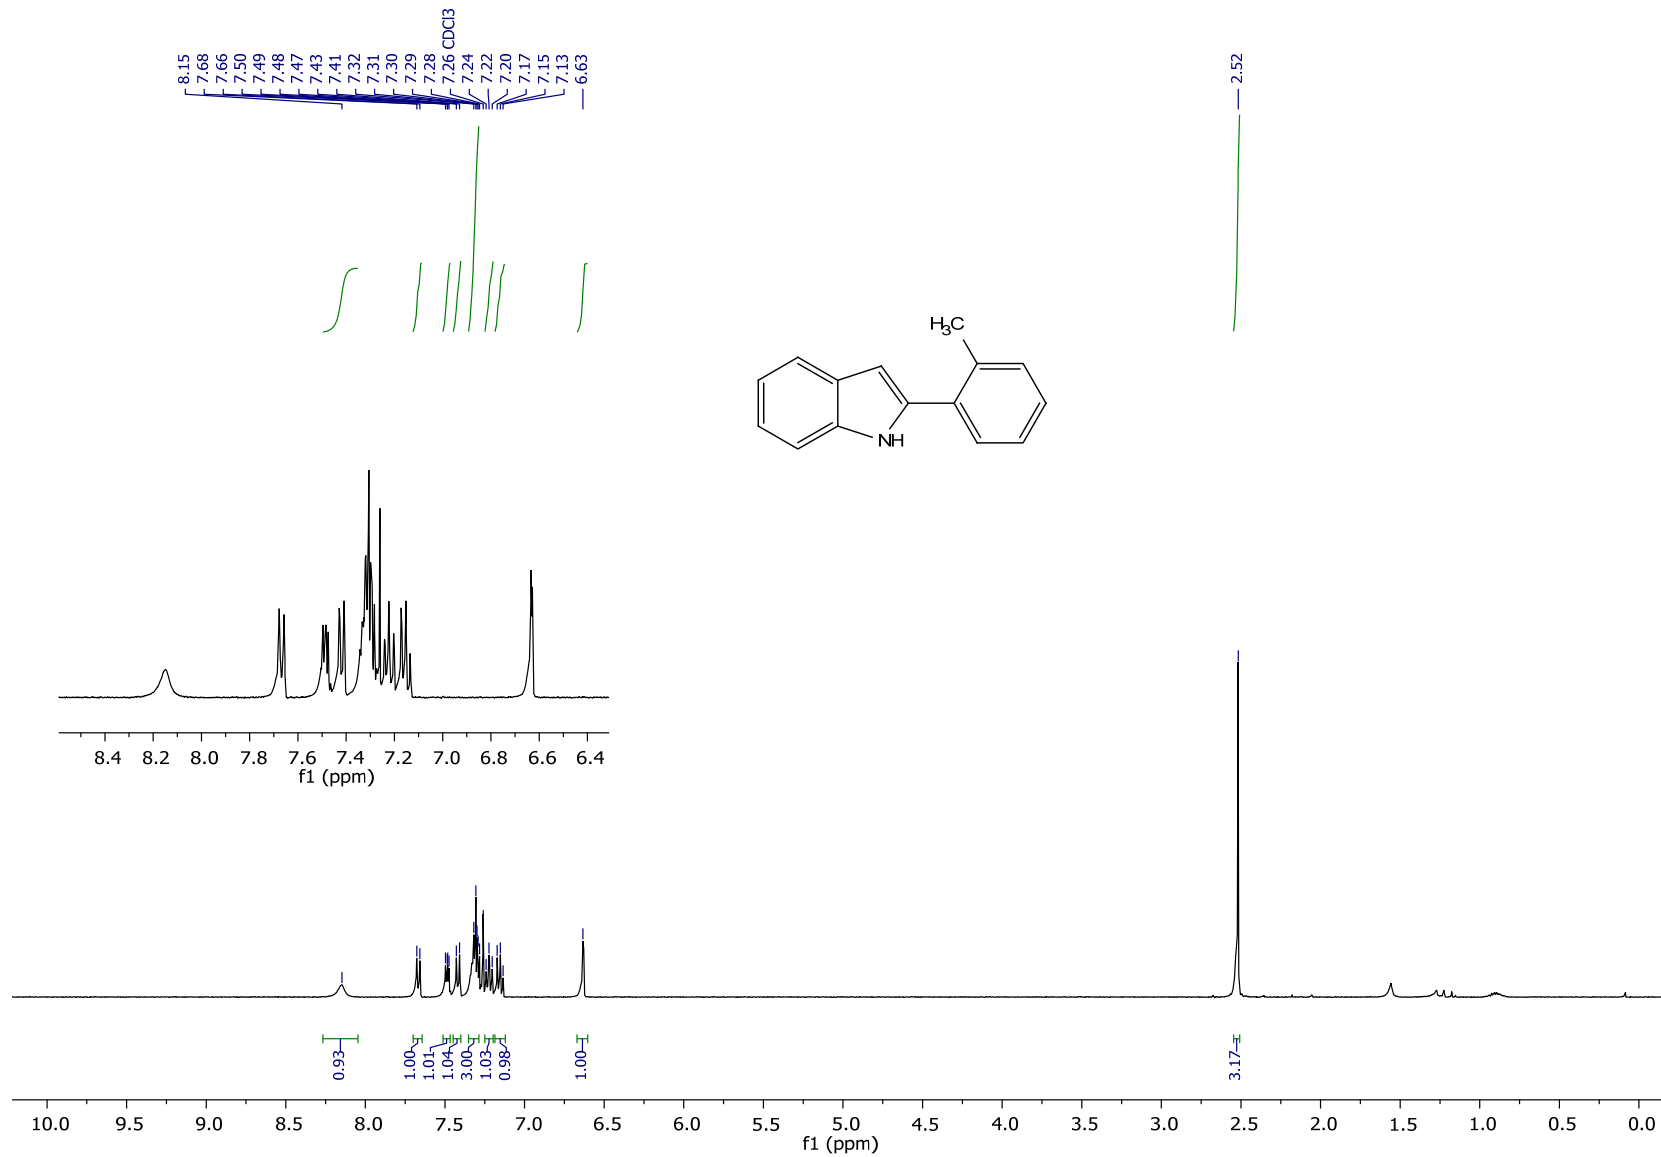

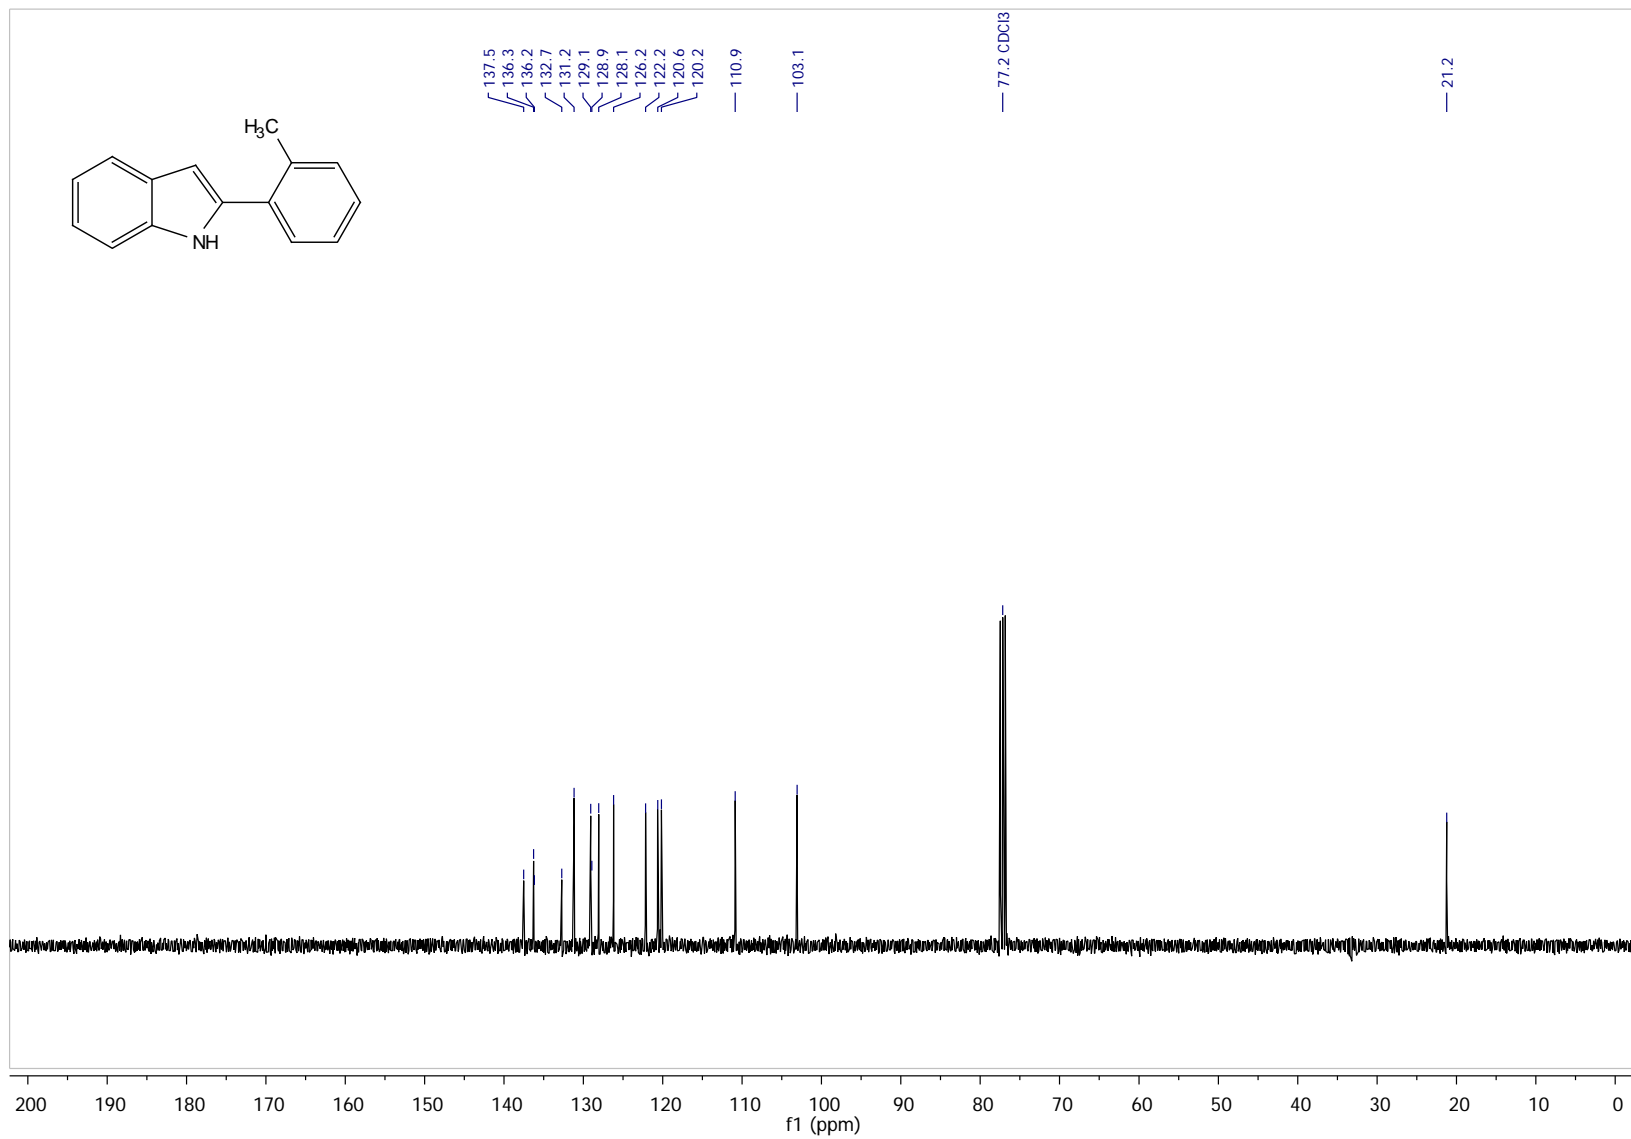

2-(2,4-dimethylphenyl)-1H-indole (4b)

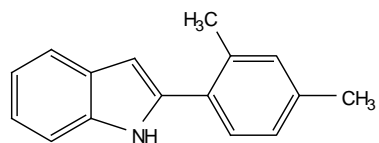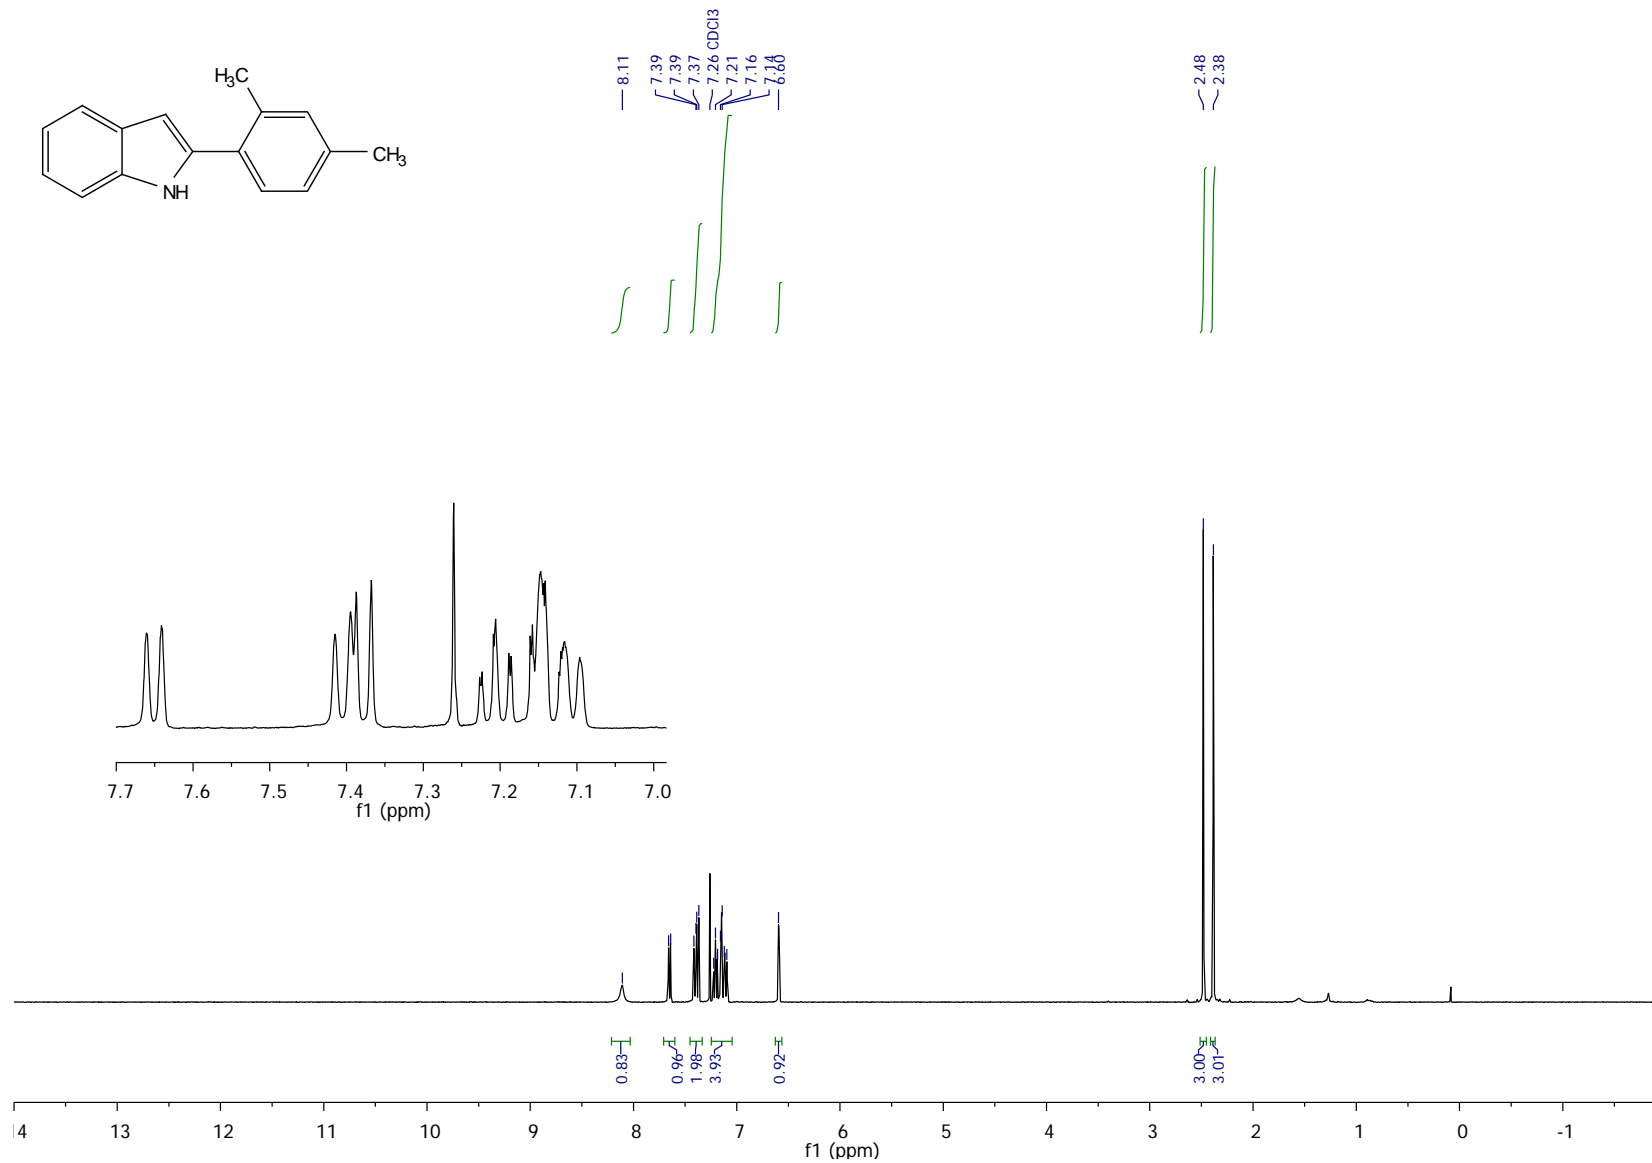

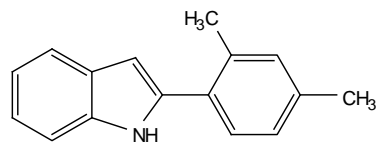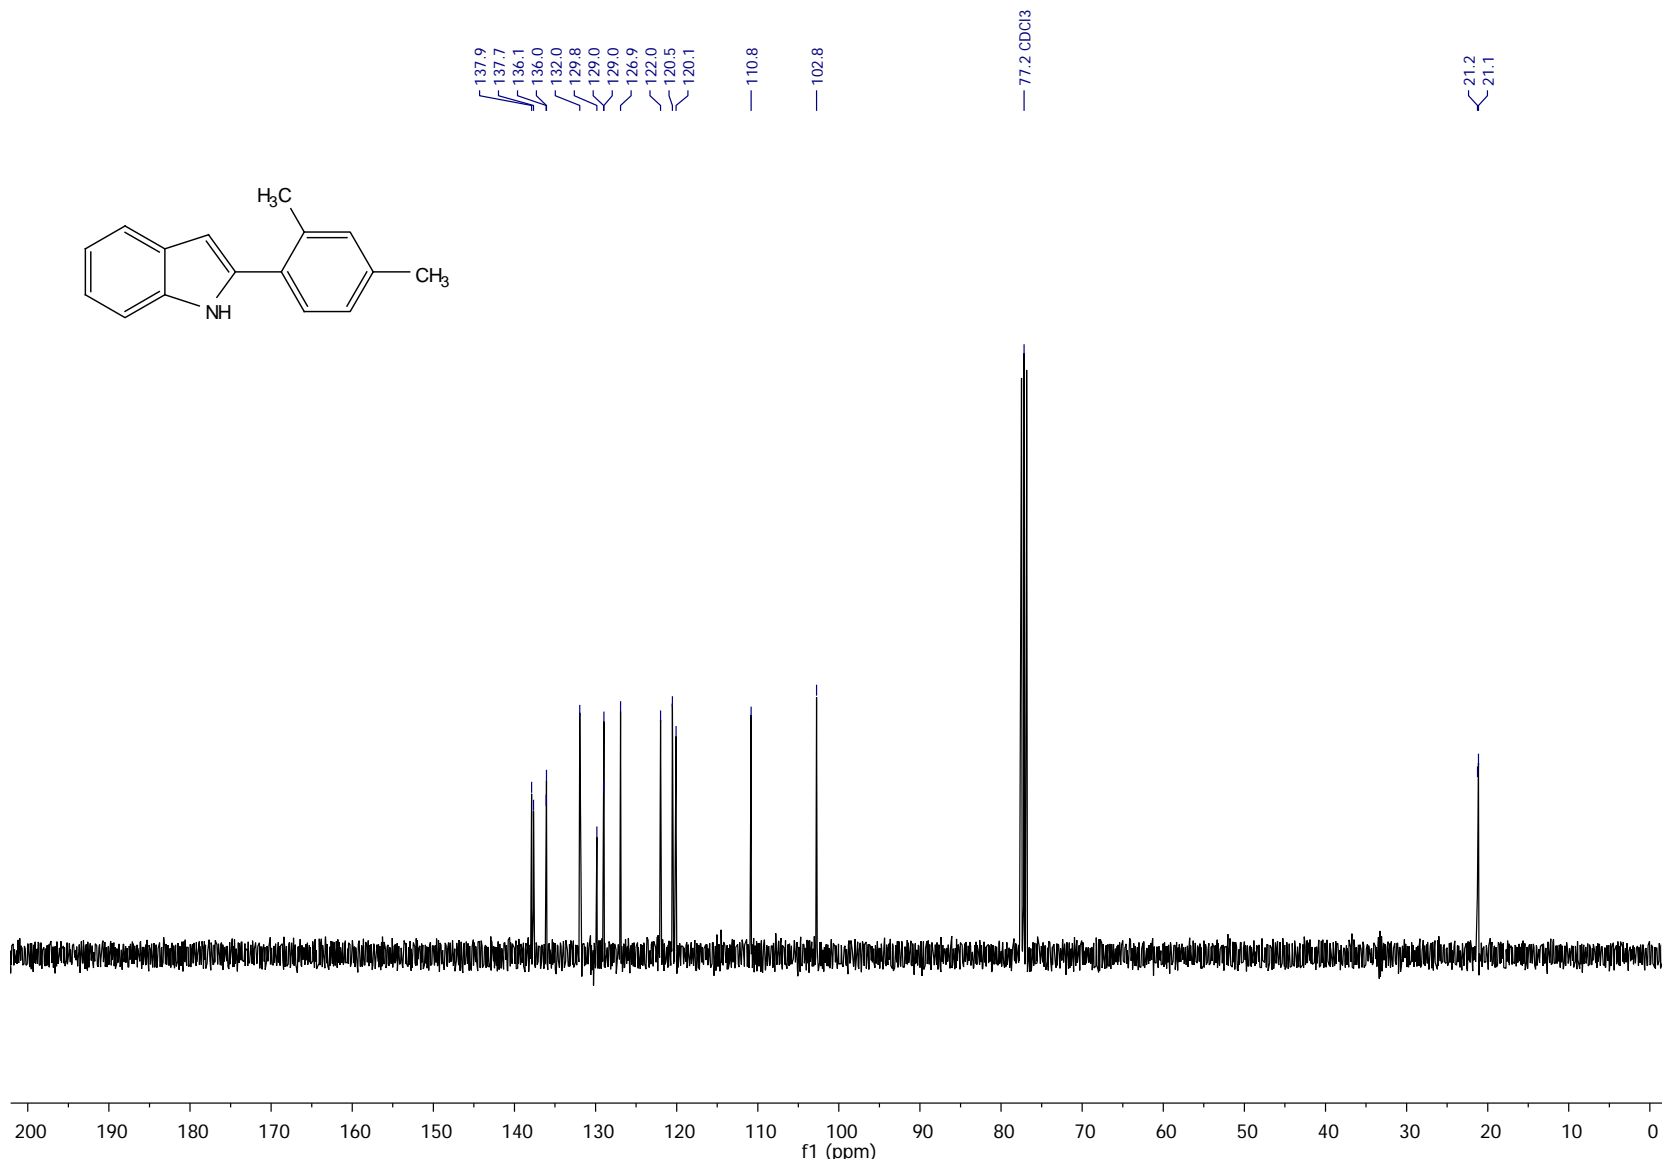

2-mesityl-1H-indole (4c -C-2)

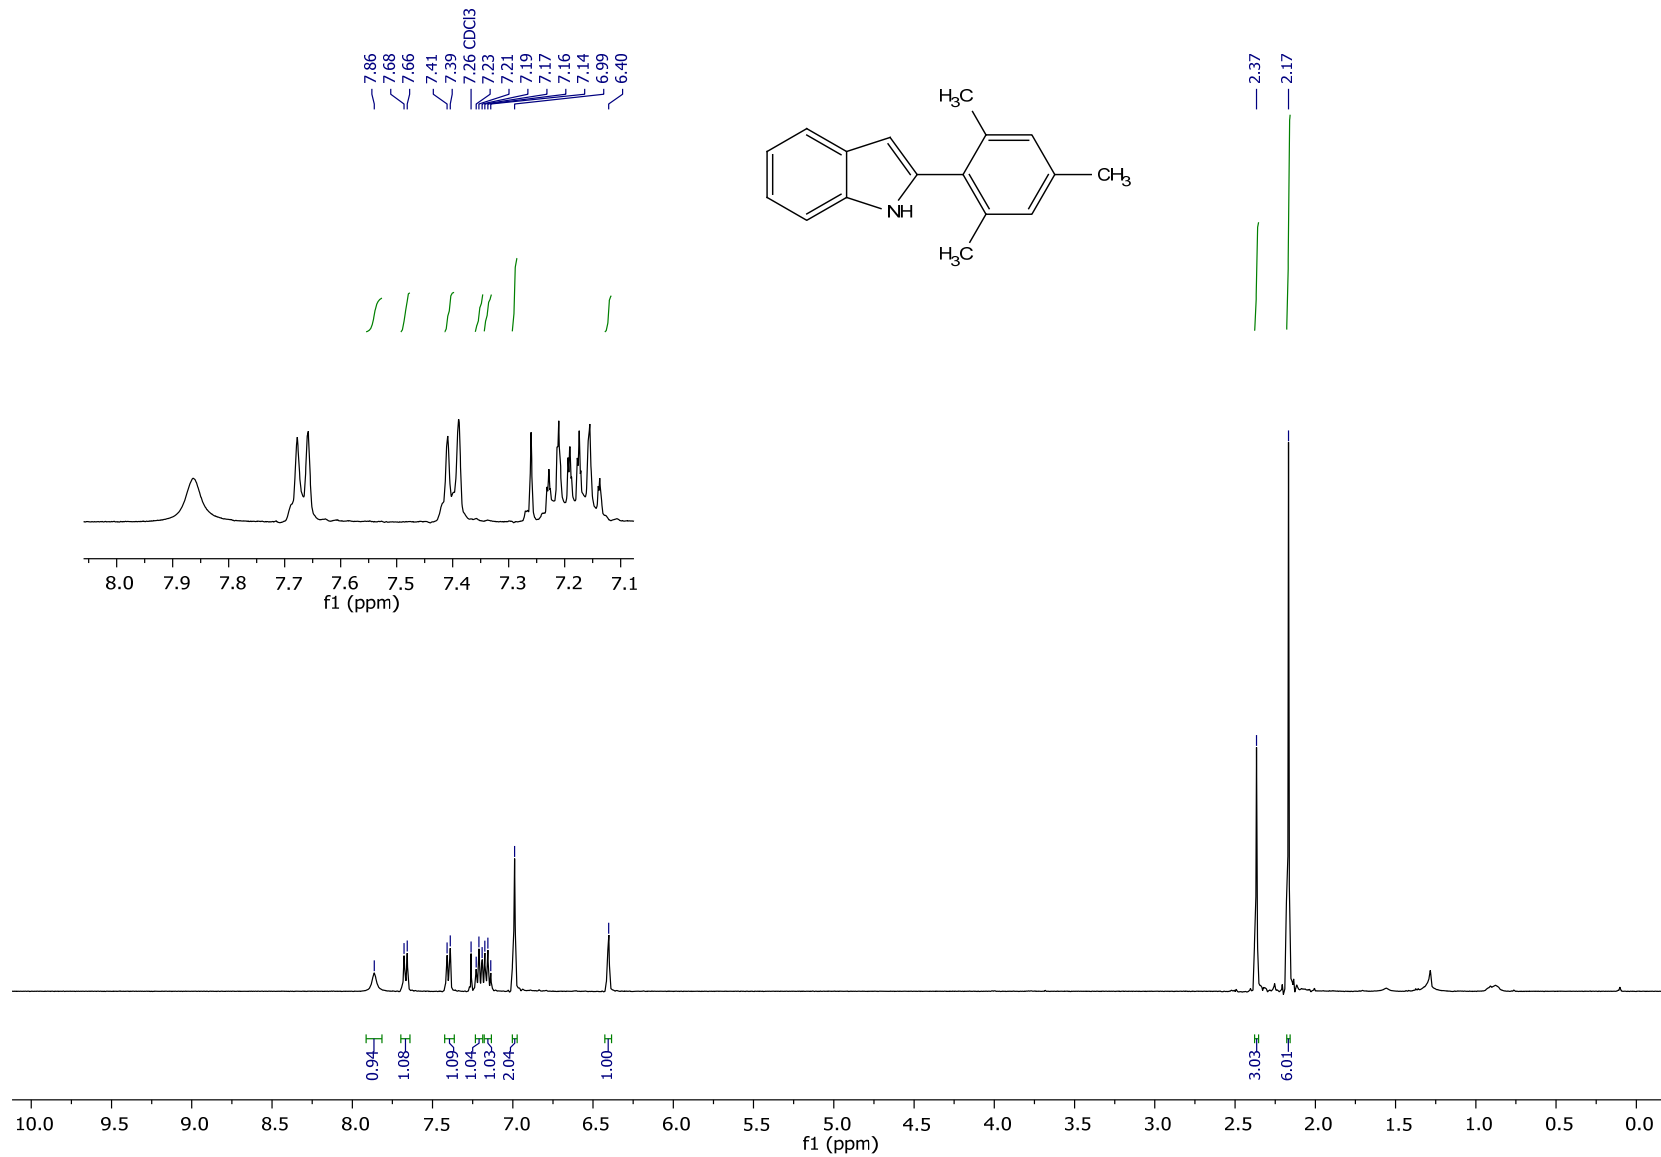



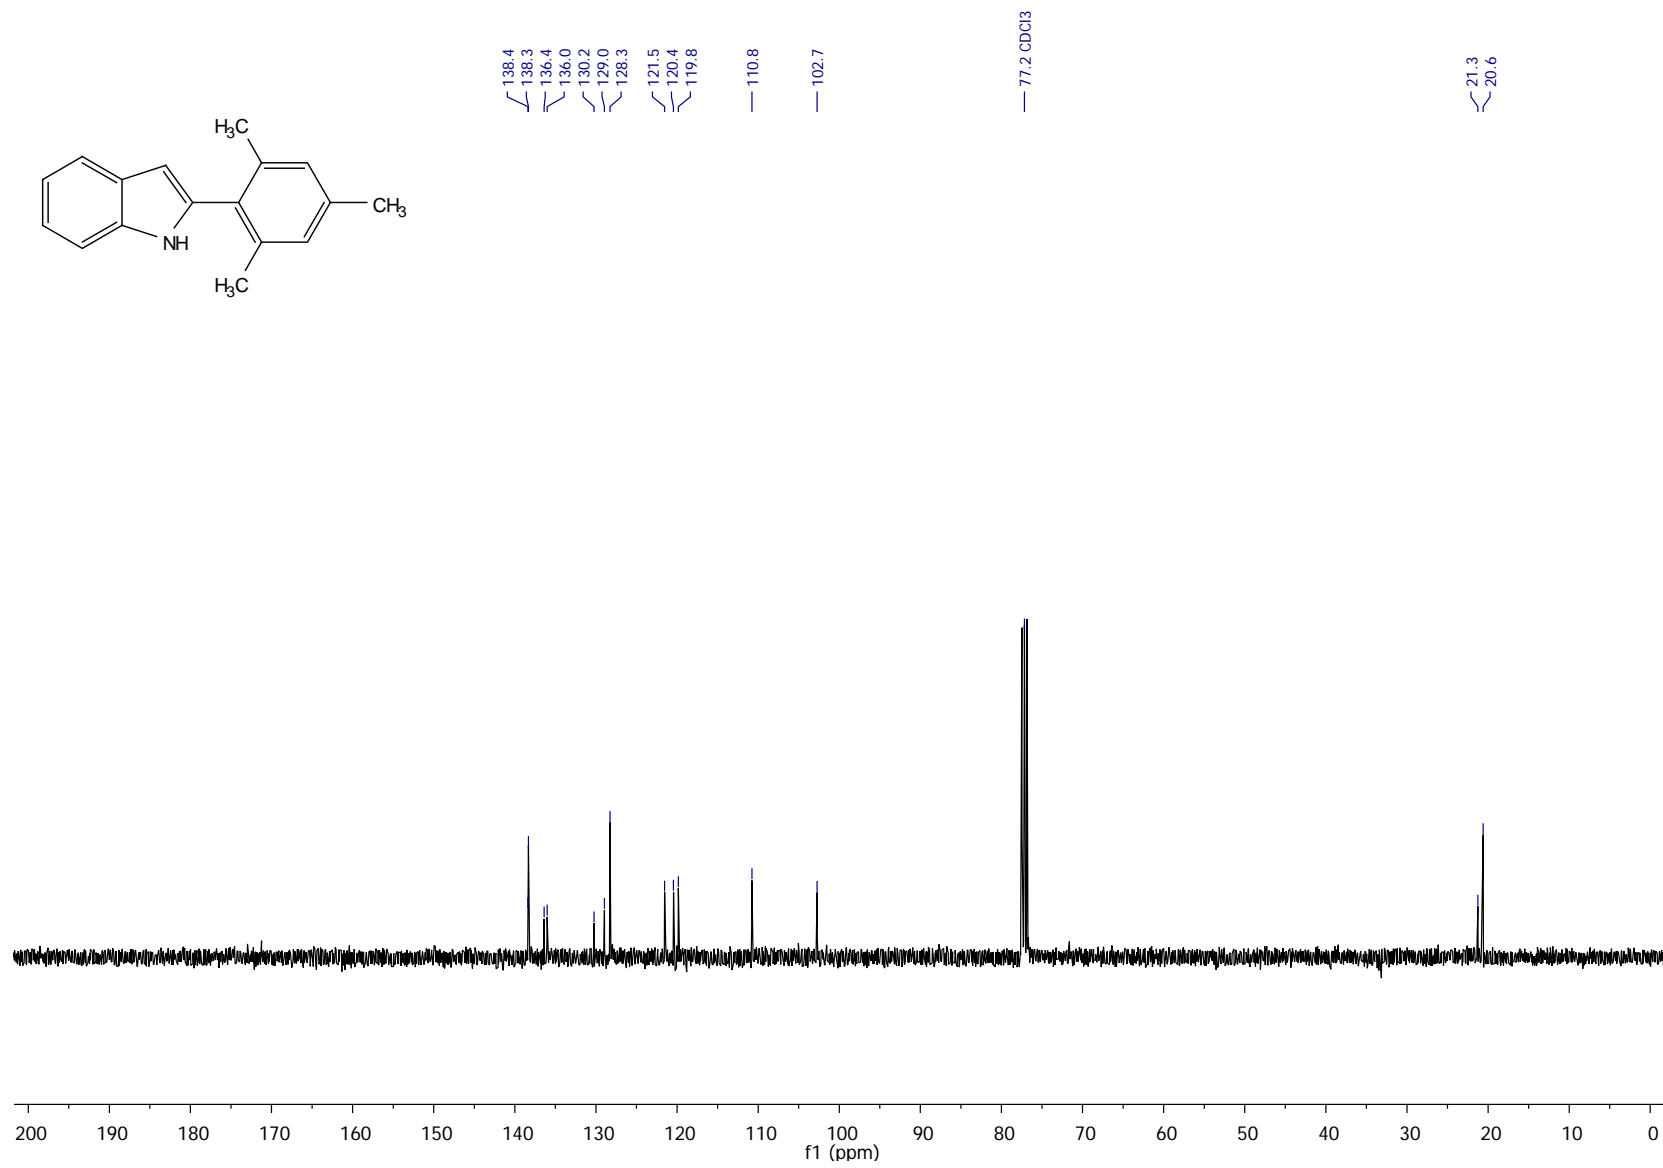

3-mesityl-1H-indole (4c - C-3)

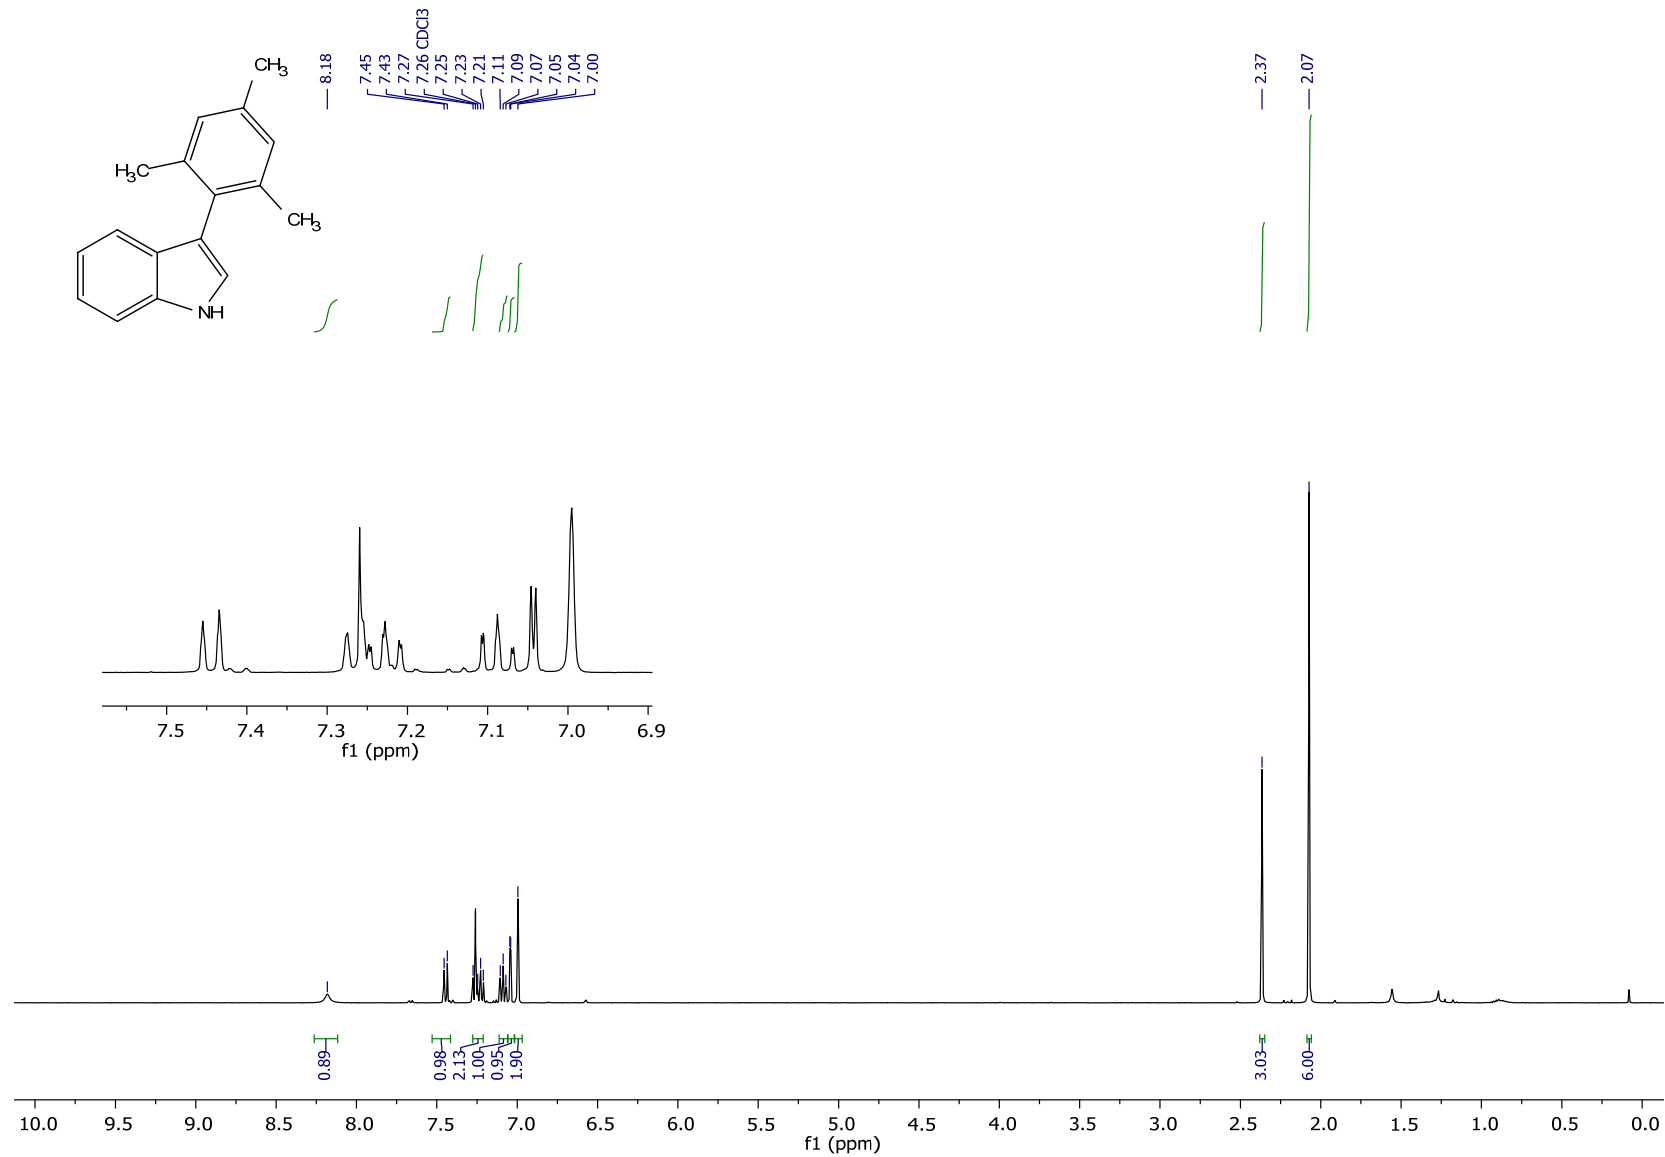

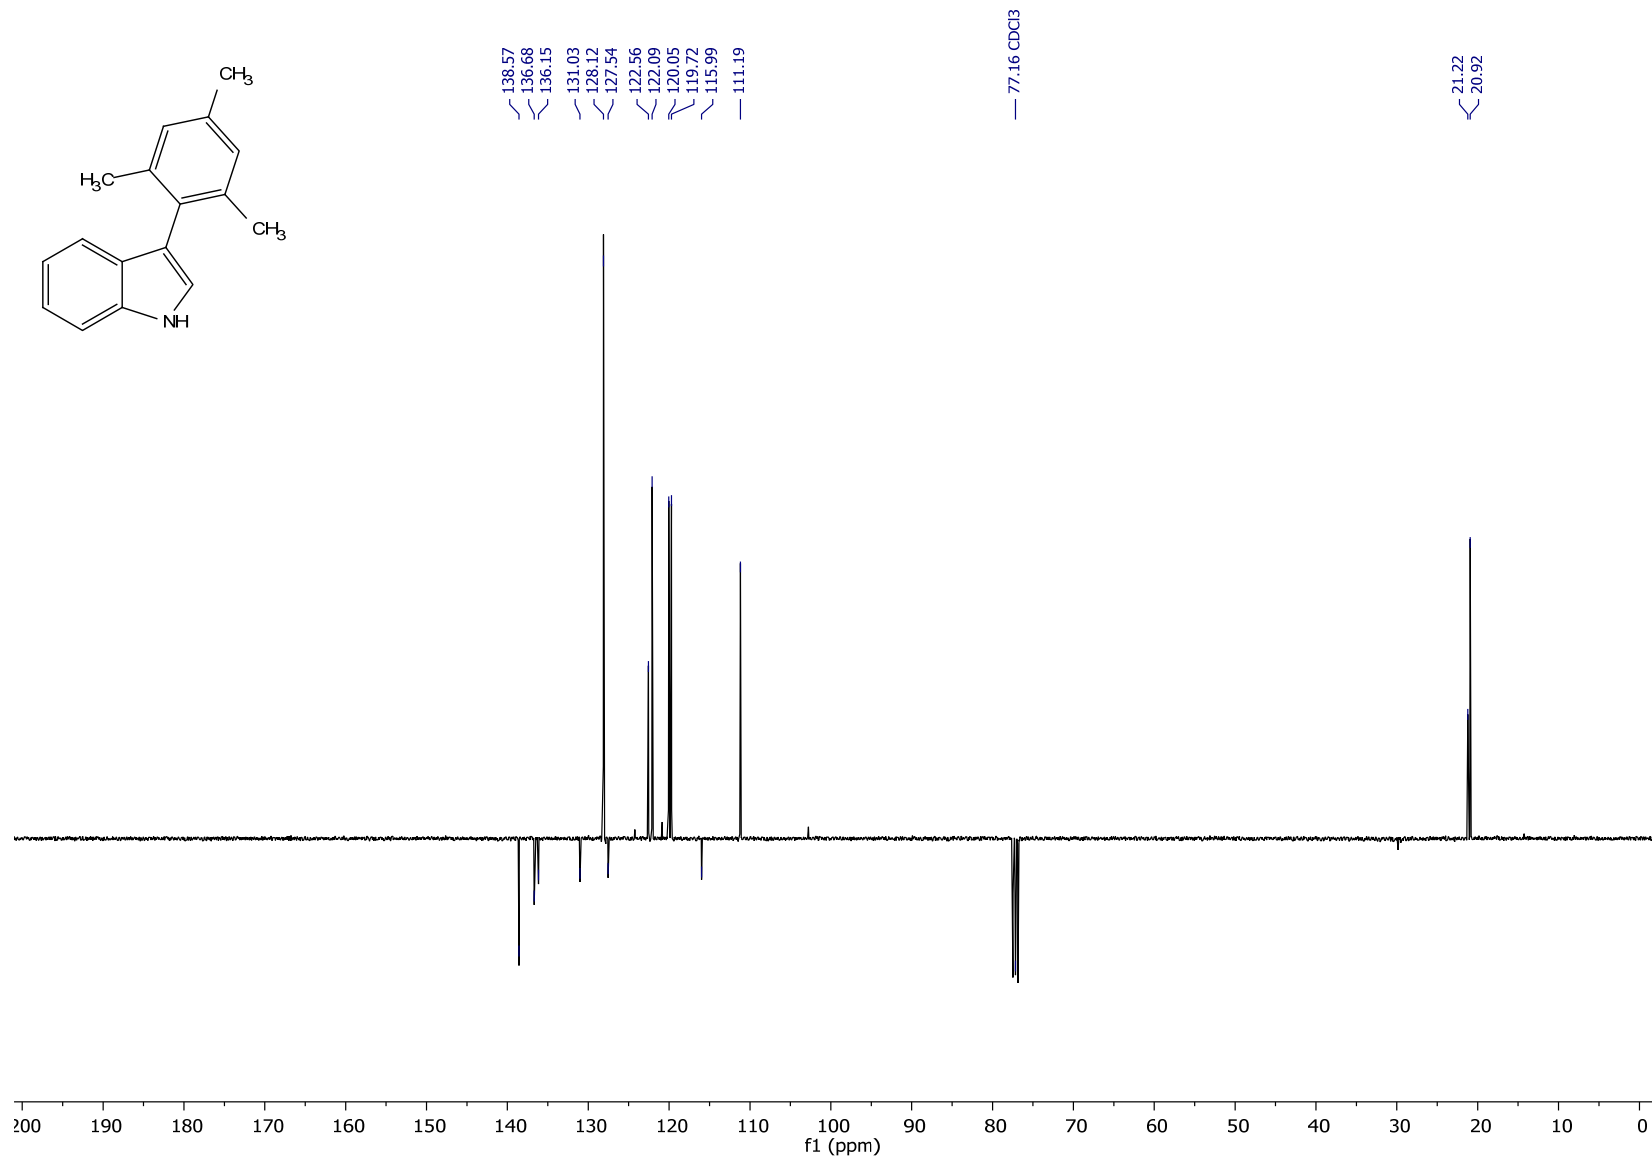

2-(4-methoxy-2-methylphenyl)-1H-indole (4d)

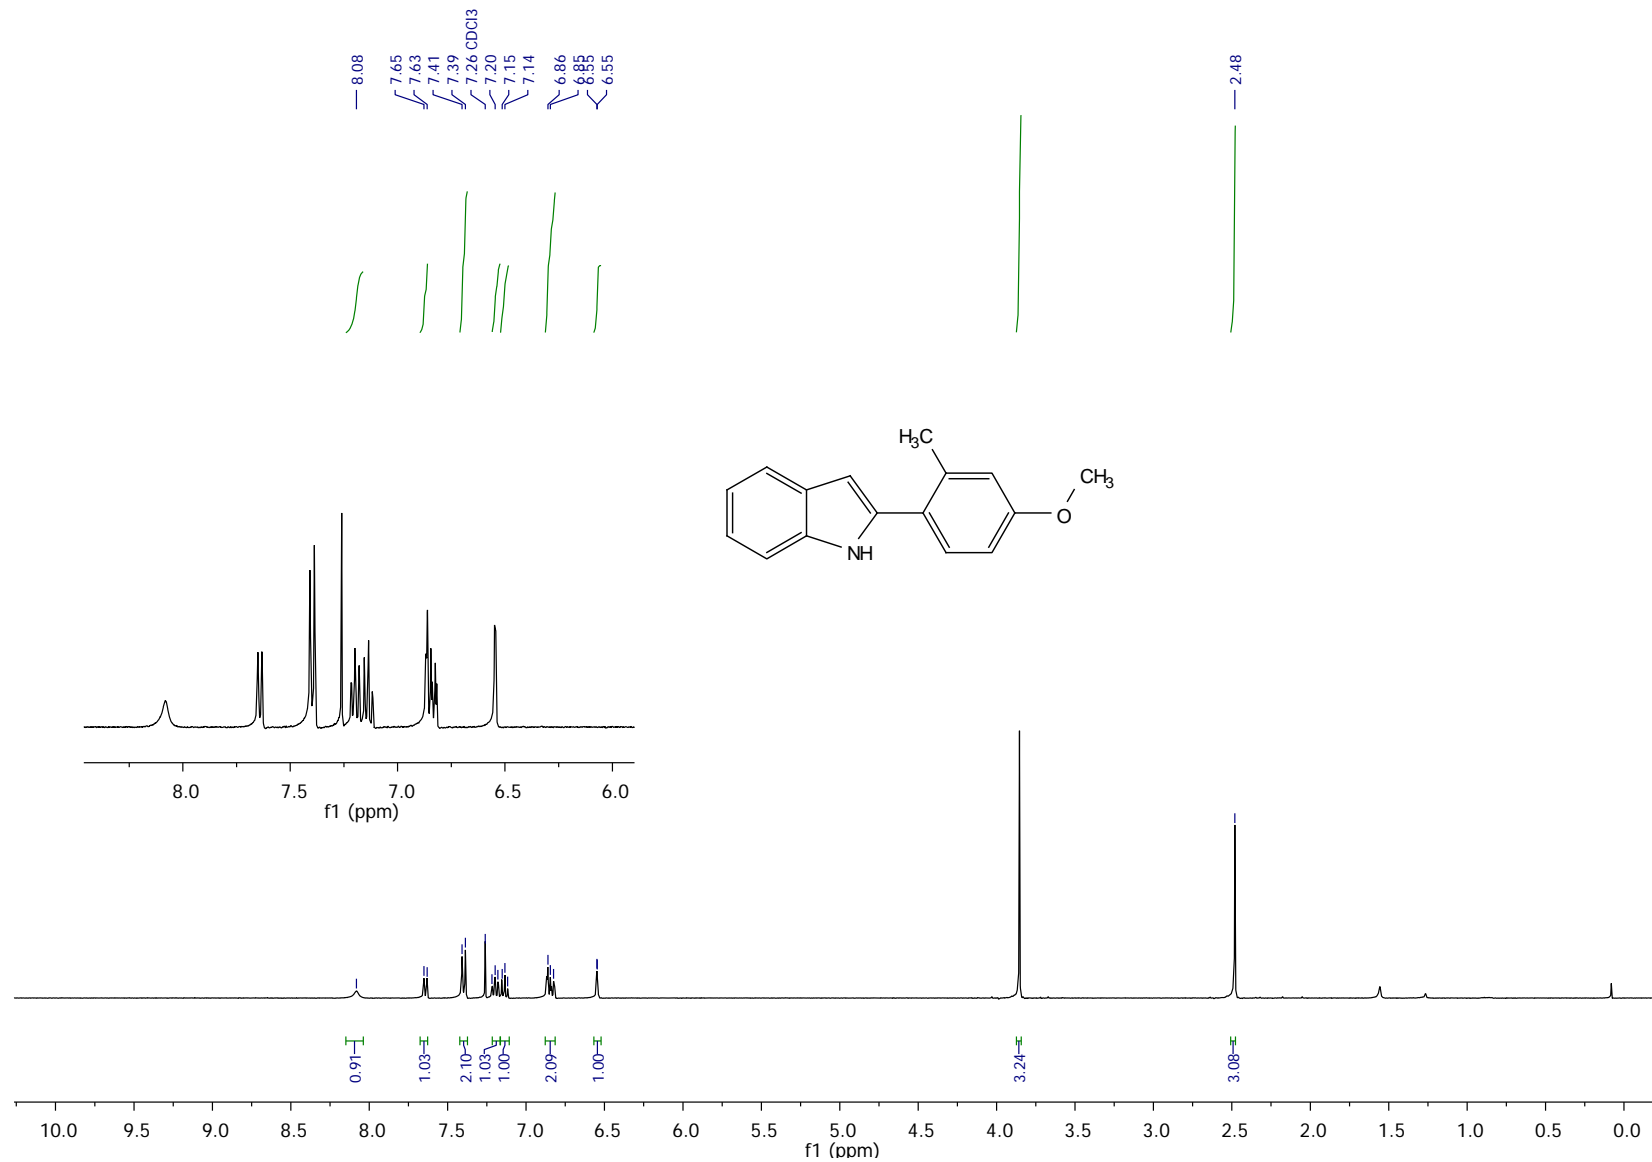

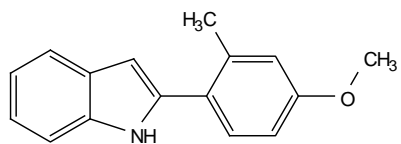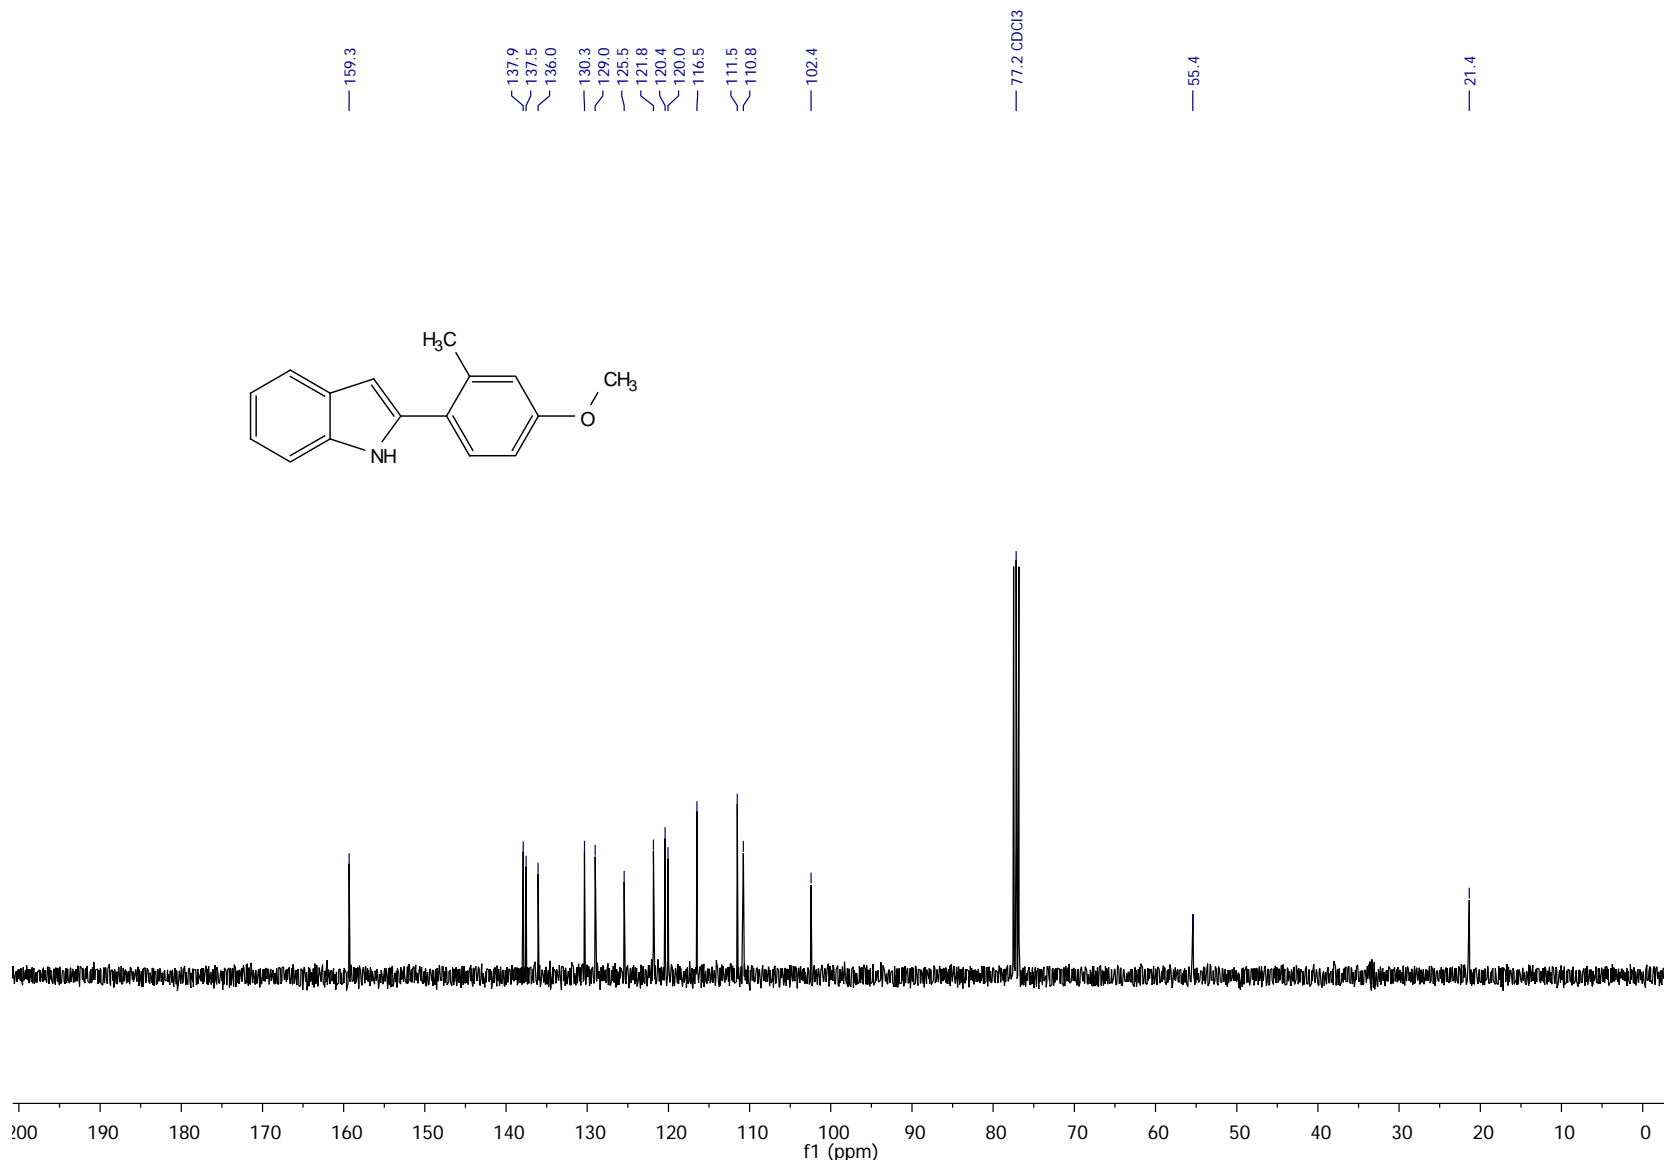

2-(4-methoxyphenyl)-3-methyl-1H-indole (4e)

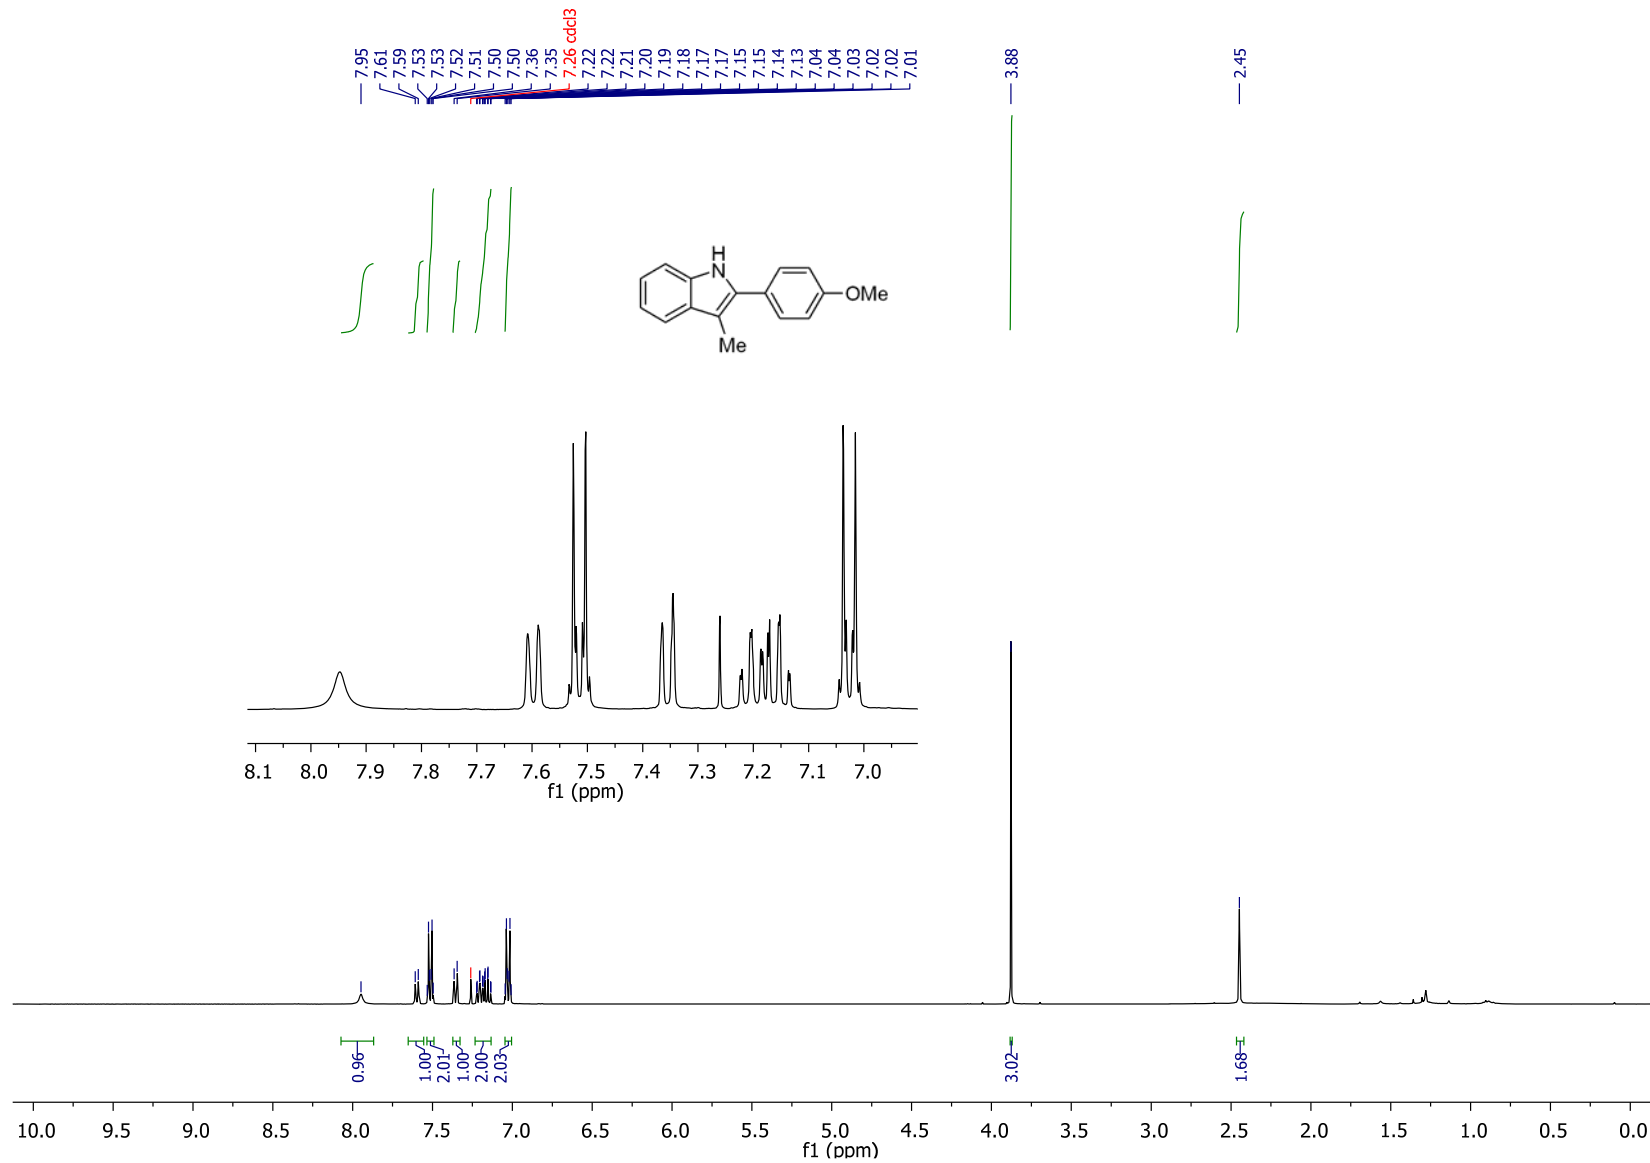

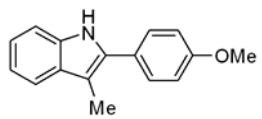

Chemical Formula: C<sub>16</sub>H<sub>15</sub>NO  
Exact Mass: 237,1154  
Molecular Weight: 237,3020

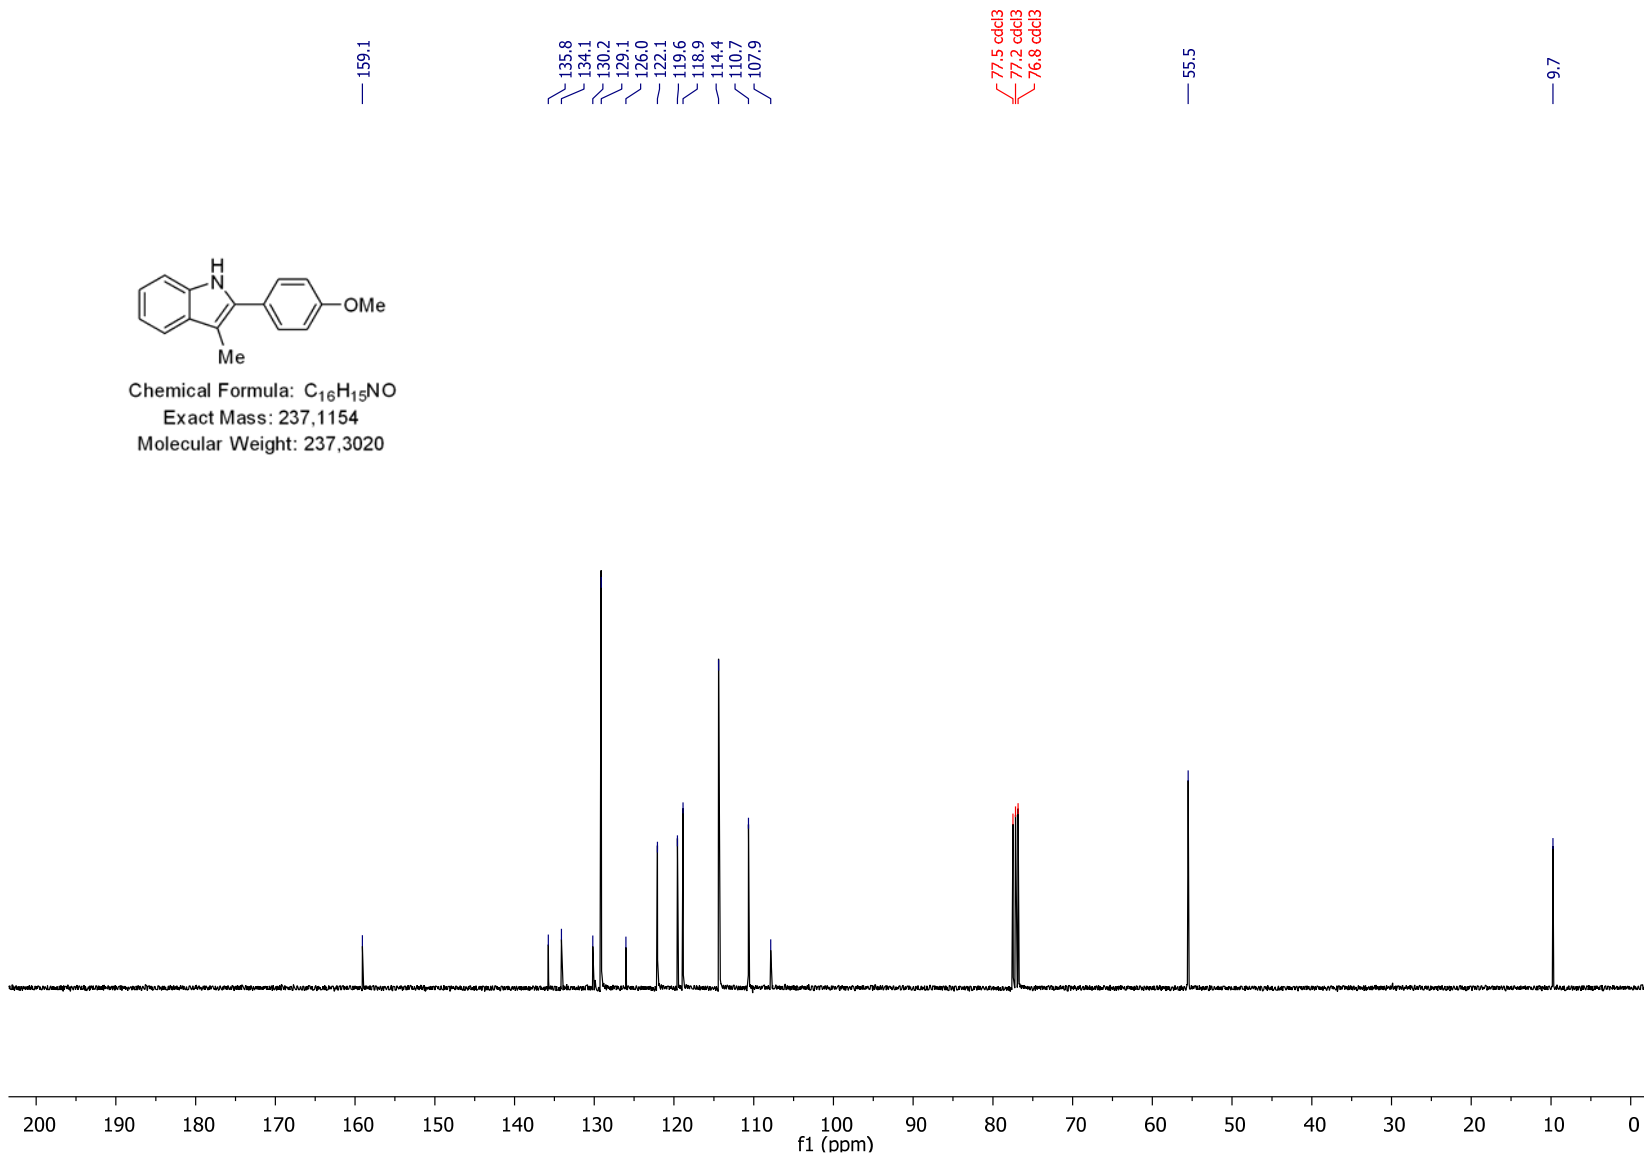

6-fluoro-1-methyl-2-phenyl-indole (5a)

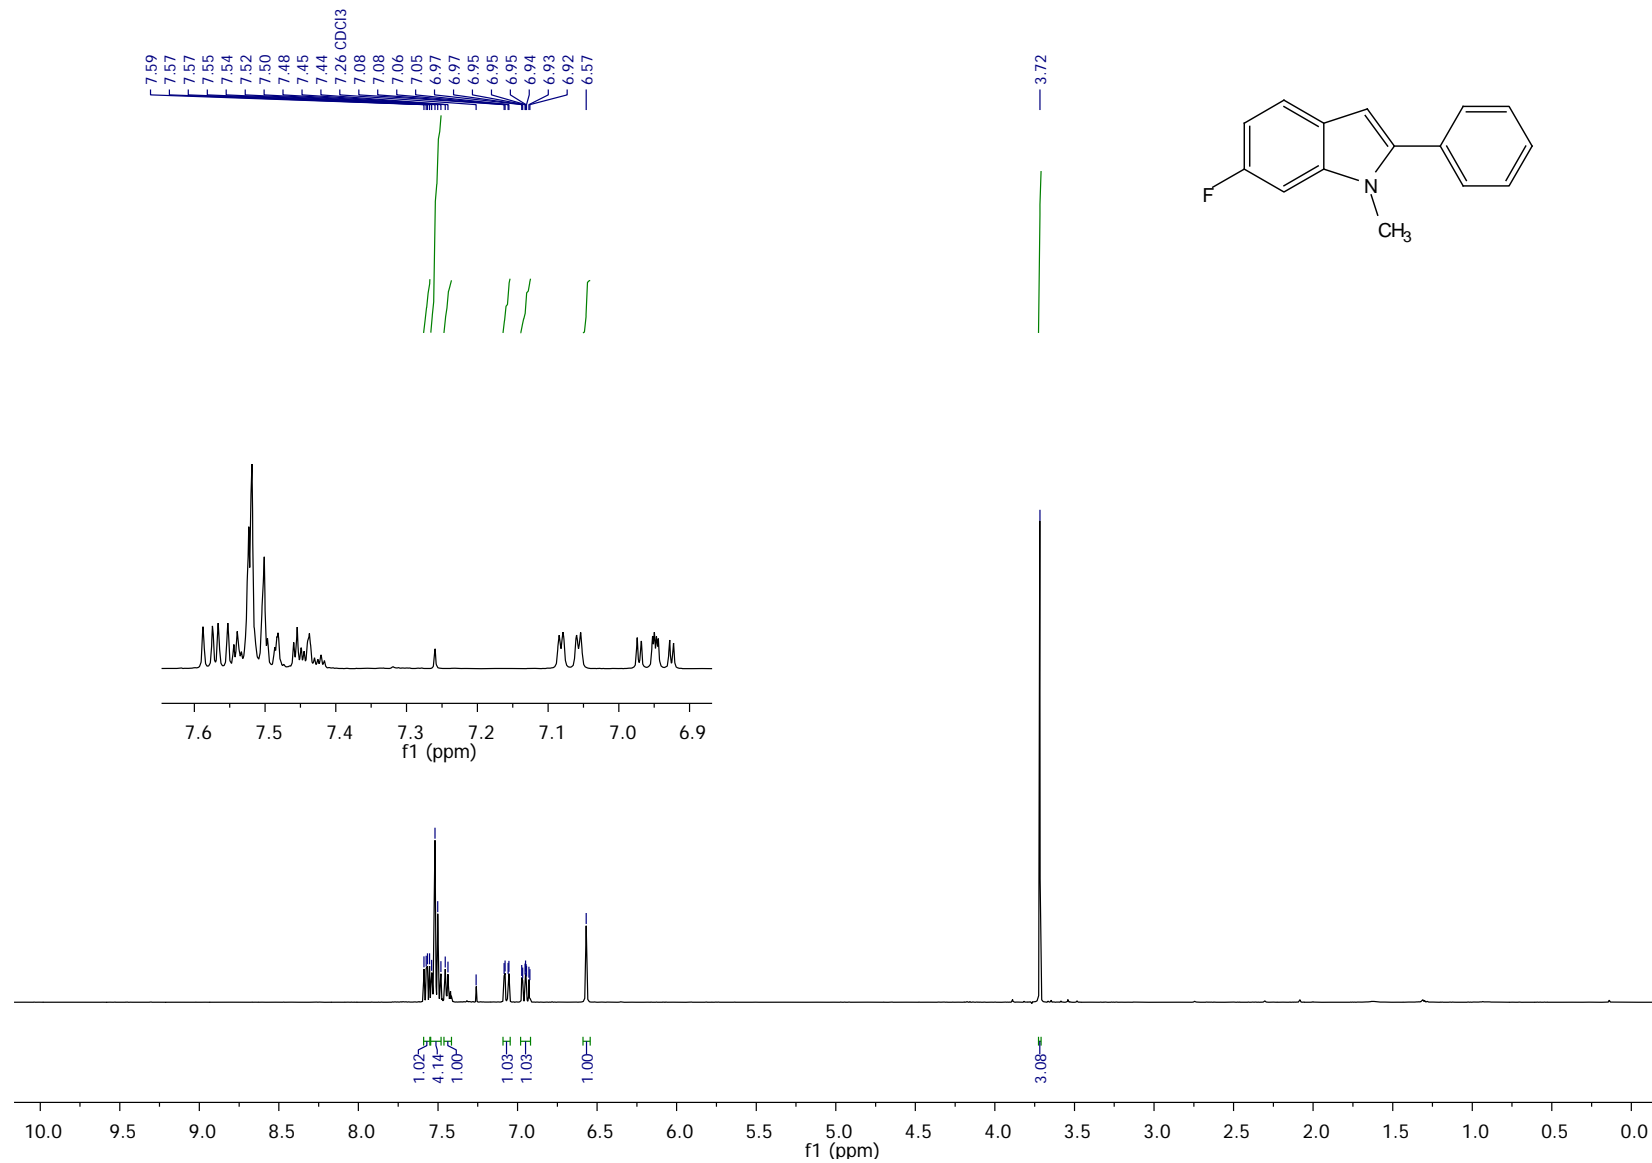



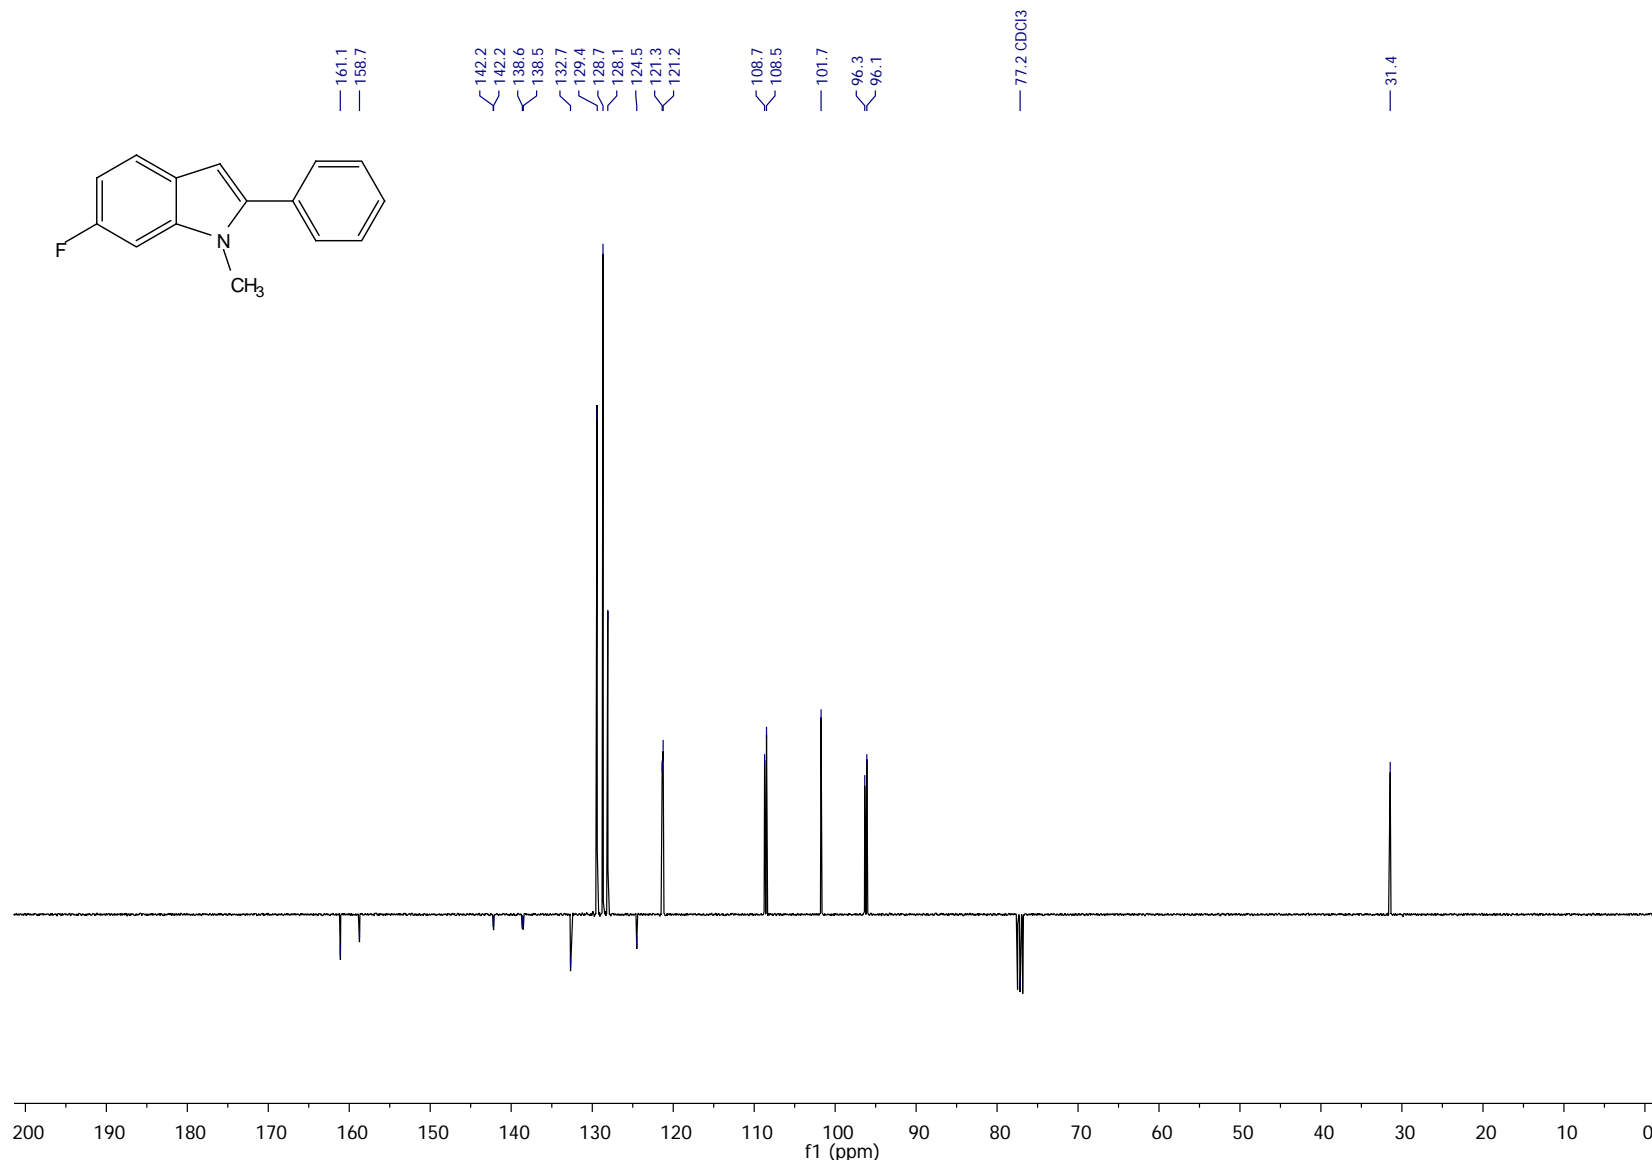

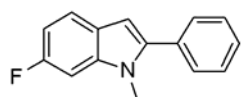

Chemical Formula: C<sub>15</sub>H<sub>12</sub>FN  
Exact Mass: 225,0954

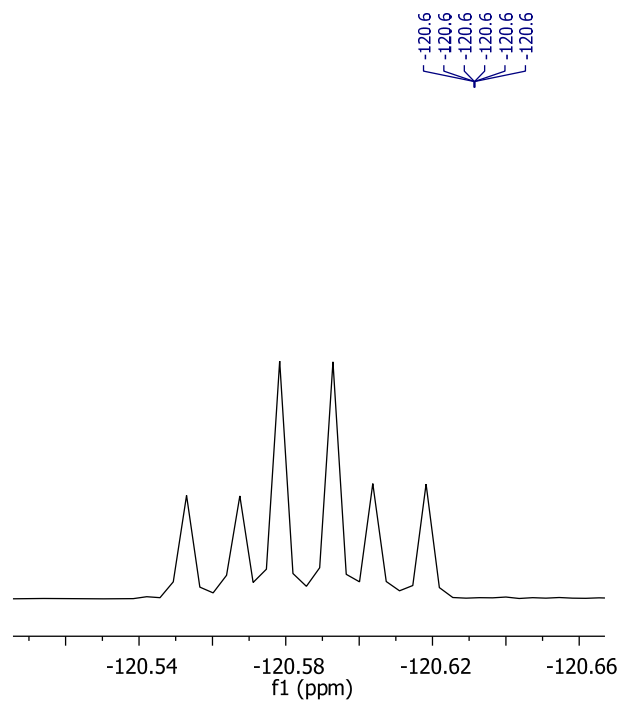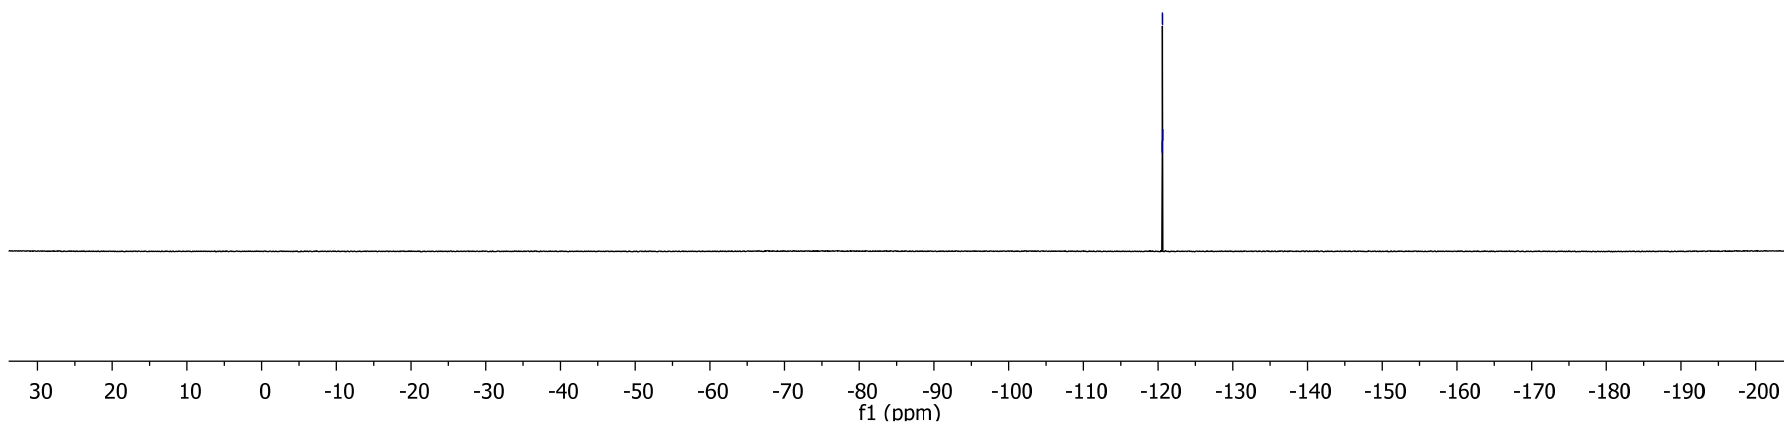

6-fluoro-2-(4-fluorophenyl)-1-methyl-1H-indole (5b)

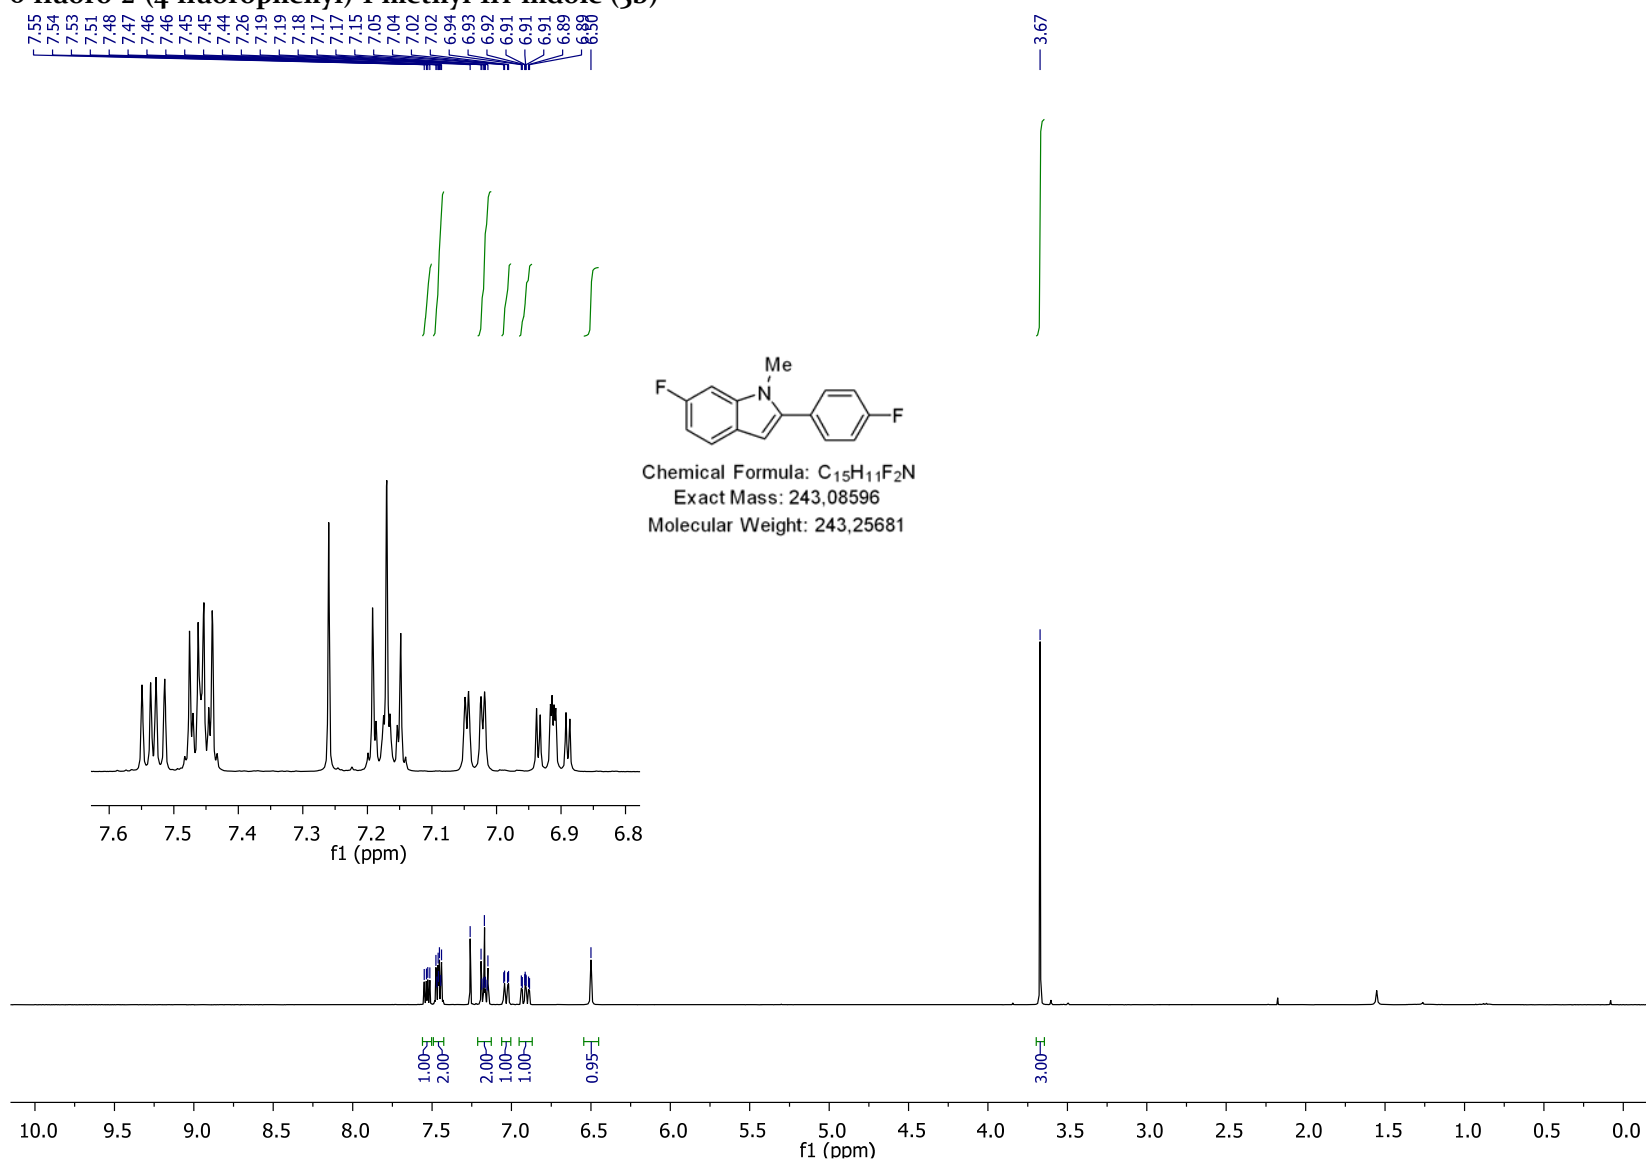

164.0  
161.6  
161.2  
158.8

141.1  
141.1  
138.6  
138.4  
131.2  
131.1  
128.8  
128.8  
124.4  
121.4  
121.3  
115.9  
115.7

108.9  
108.6  
101.8  
96.4  
96.1

77.5 CDCl3  
77.2 CDCl3  
76.8 CDCl3

31.4

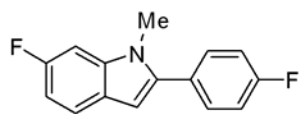

Chemical Formula: C<sub>15</sub>H<sub>11</sub>F<sub>2</sub>N  
Exact Mass: 243,08596  
Molecular Weight: 243,25681

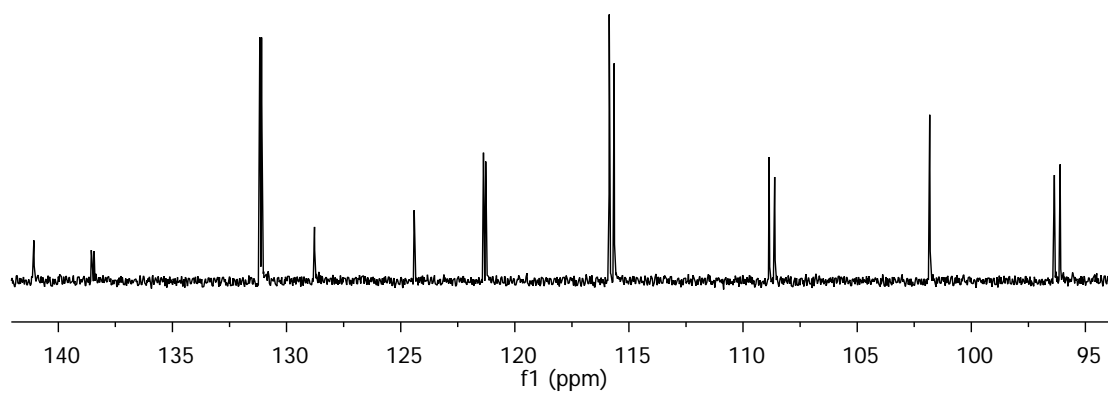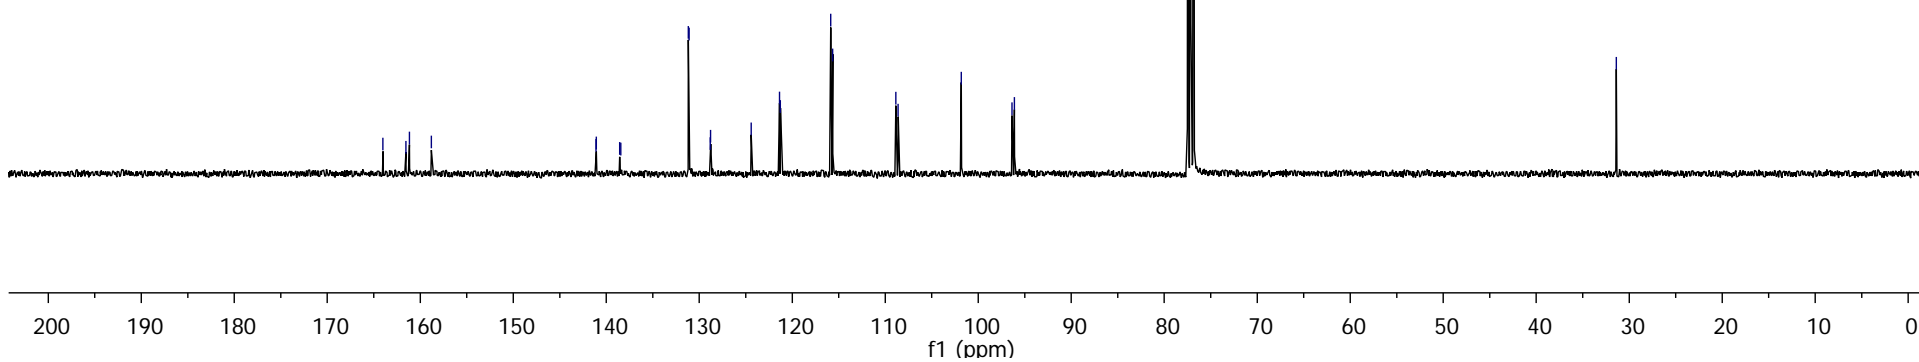

-113.61  
-113.63  
-113.63  
-113.65  
-113.66  
-113.67  
-113.69  
-120.36  
-120.37  
-120.39  
-120.40  
-120.41  
-120.43

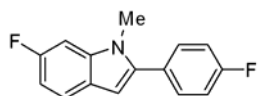

Chemical Formula: C<sub>15</sub>H<sub>11</sub>F<sub>2</sub>N

Exact Mass: 243.08596

Molecular Weight: 243.25681

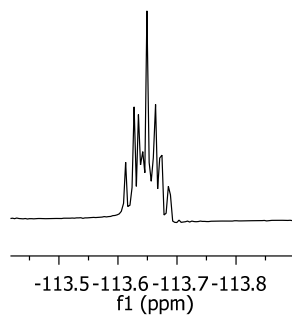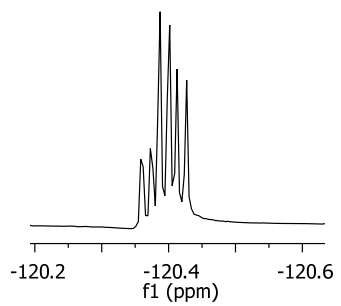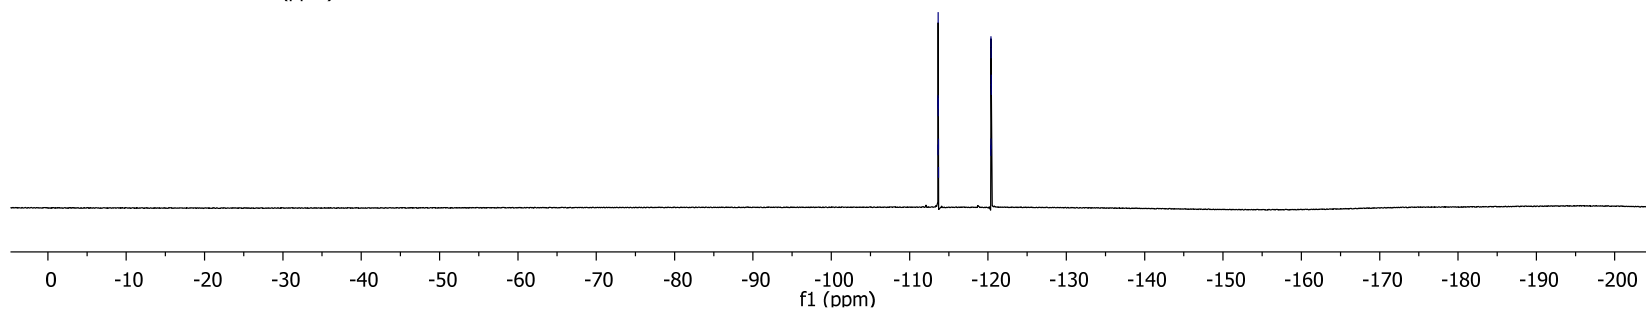

5-methoxy-1-methyl-2-phenyl-indole (5c)

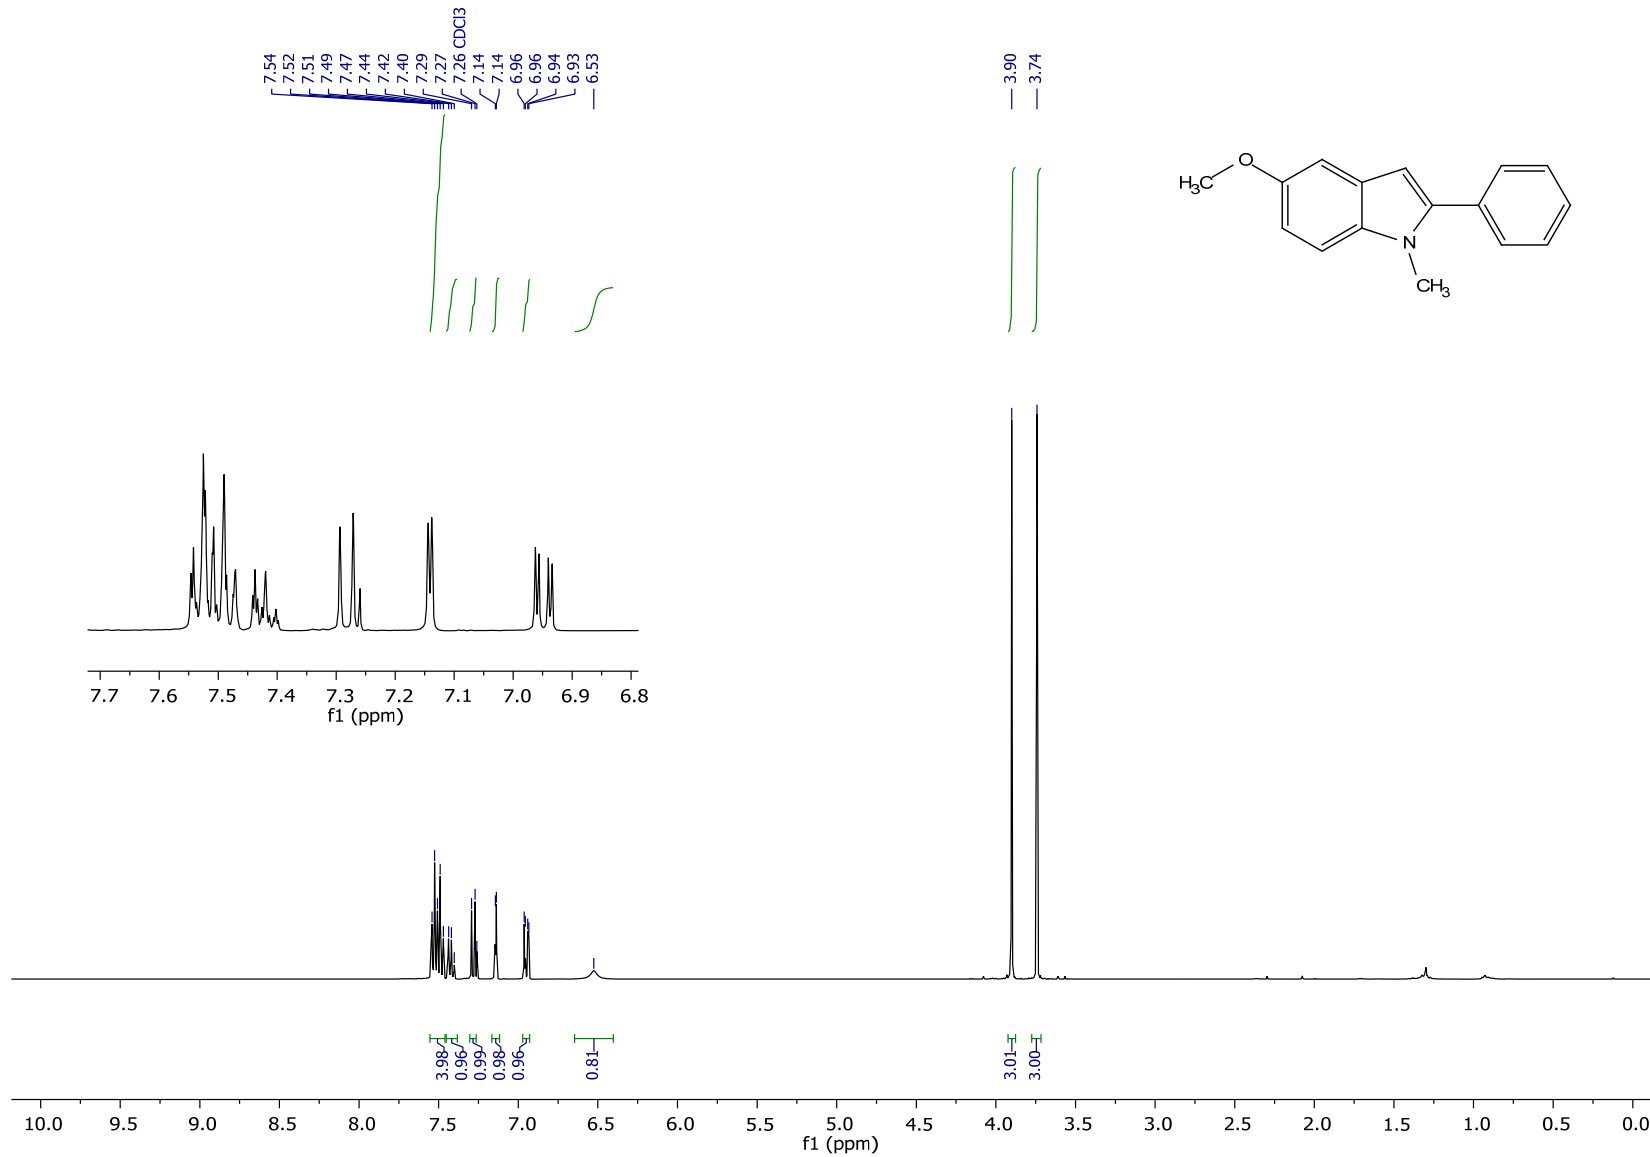

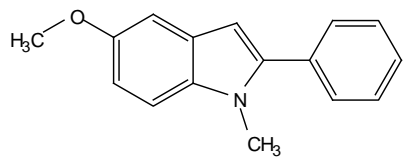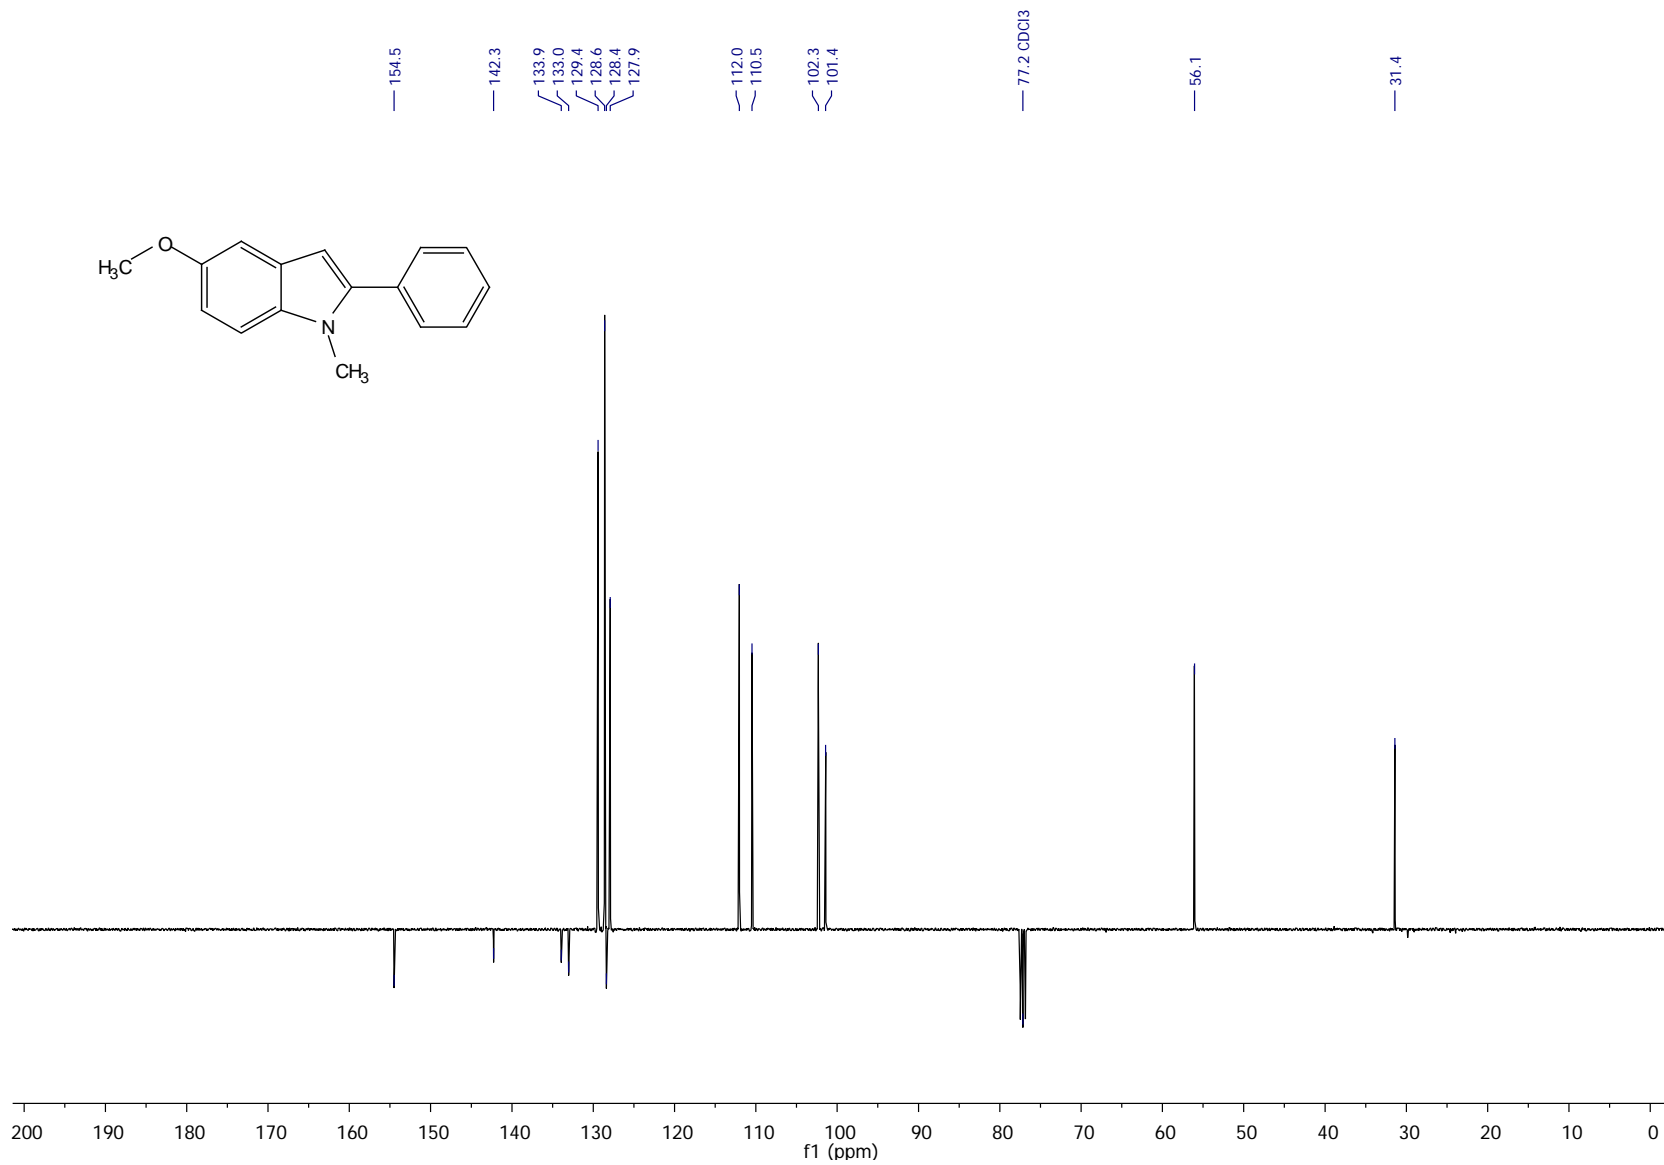

methyl 1-methyl-2-phenyl-1H-indole-6-carboxylate (5d)

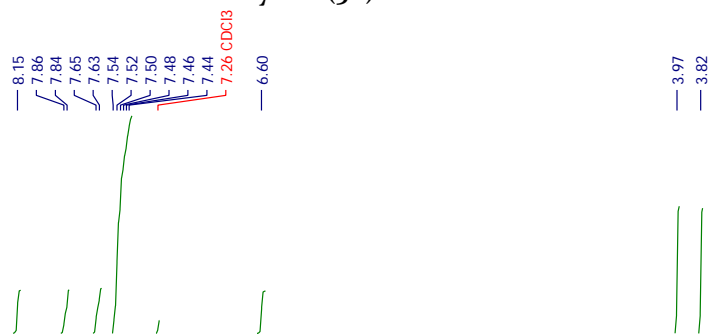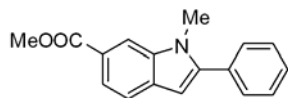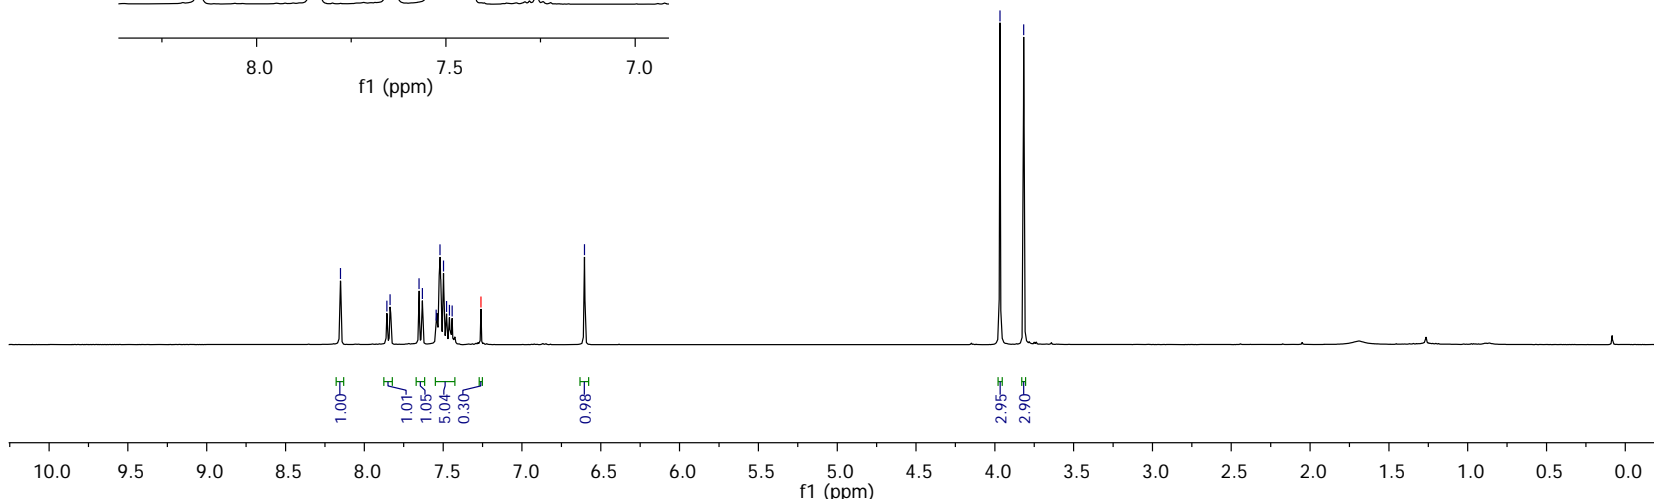



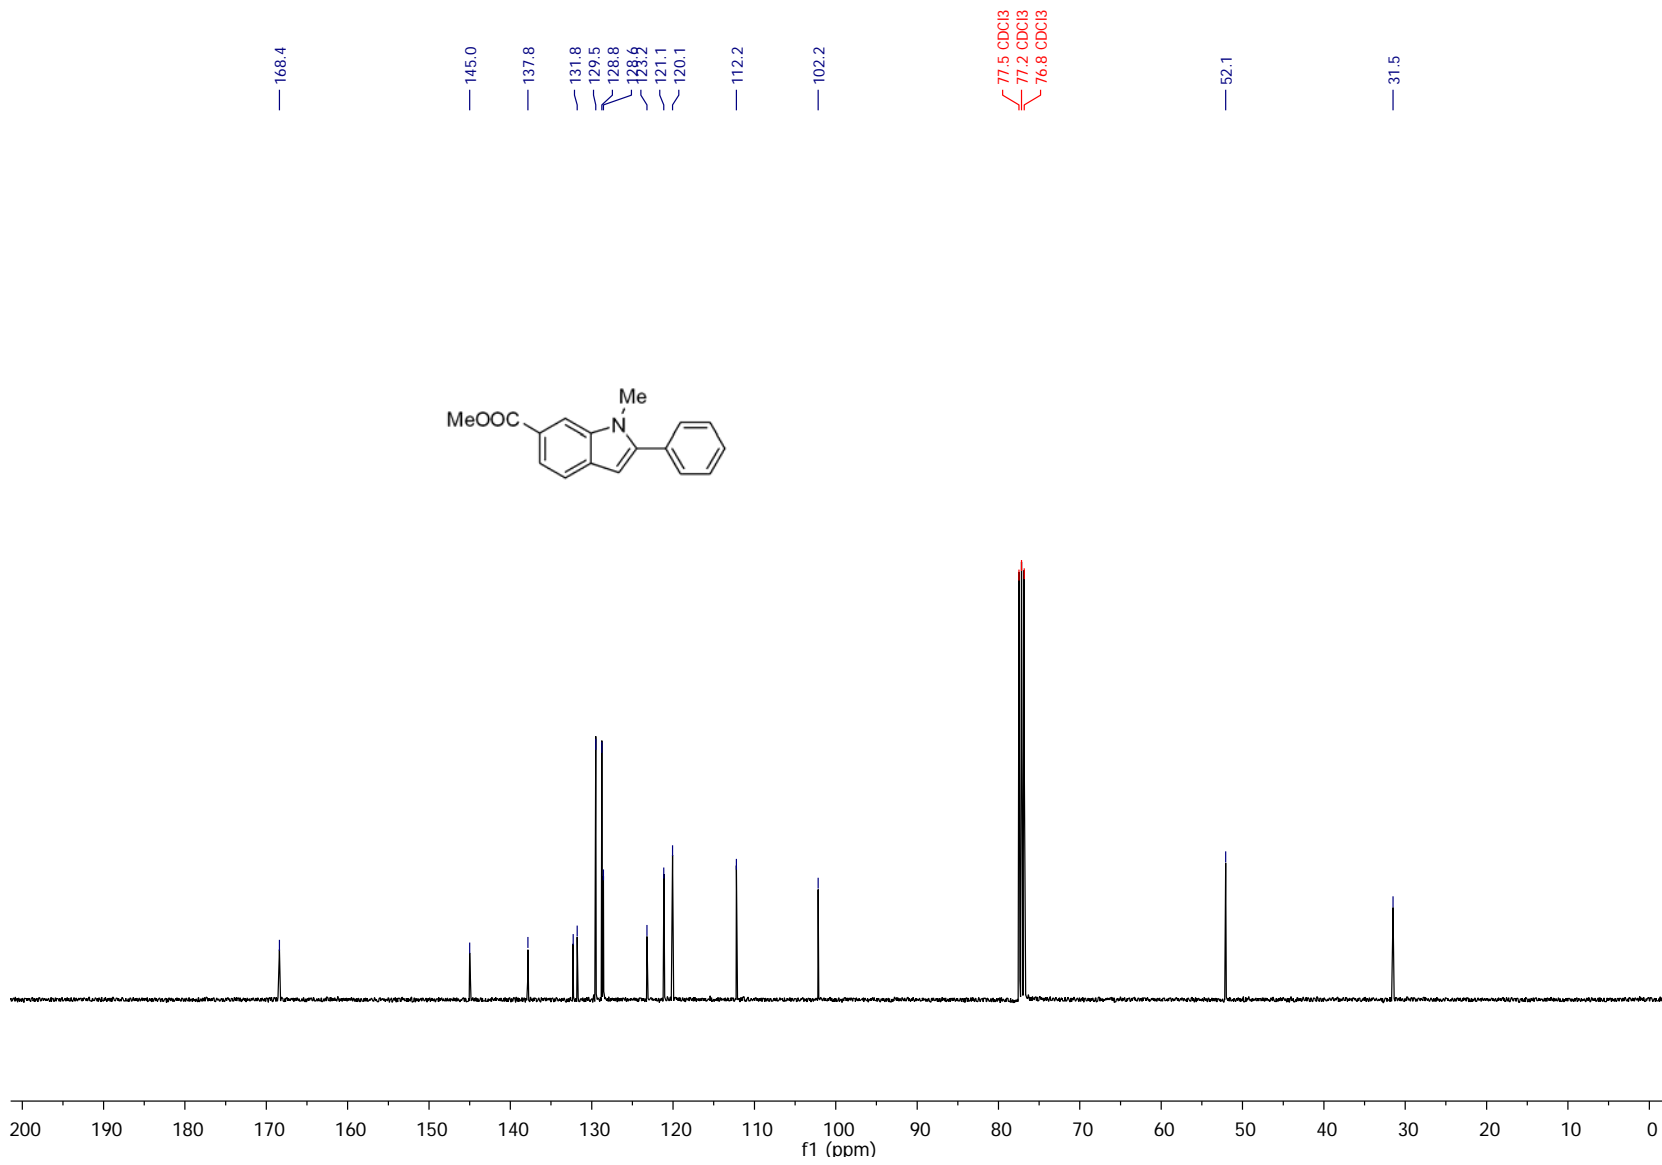

2-phenylbenzofuran (6a)

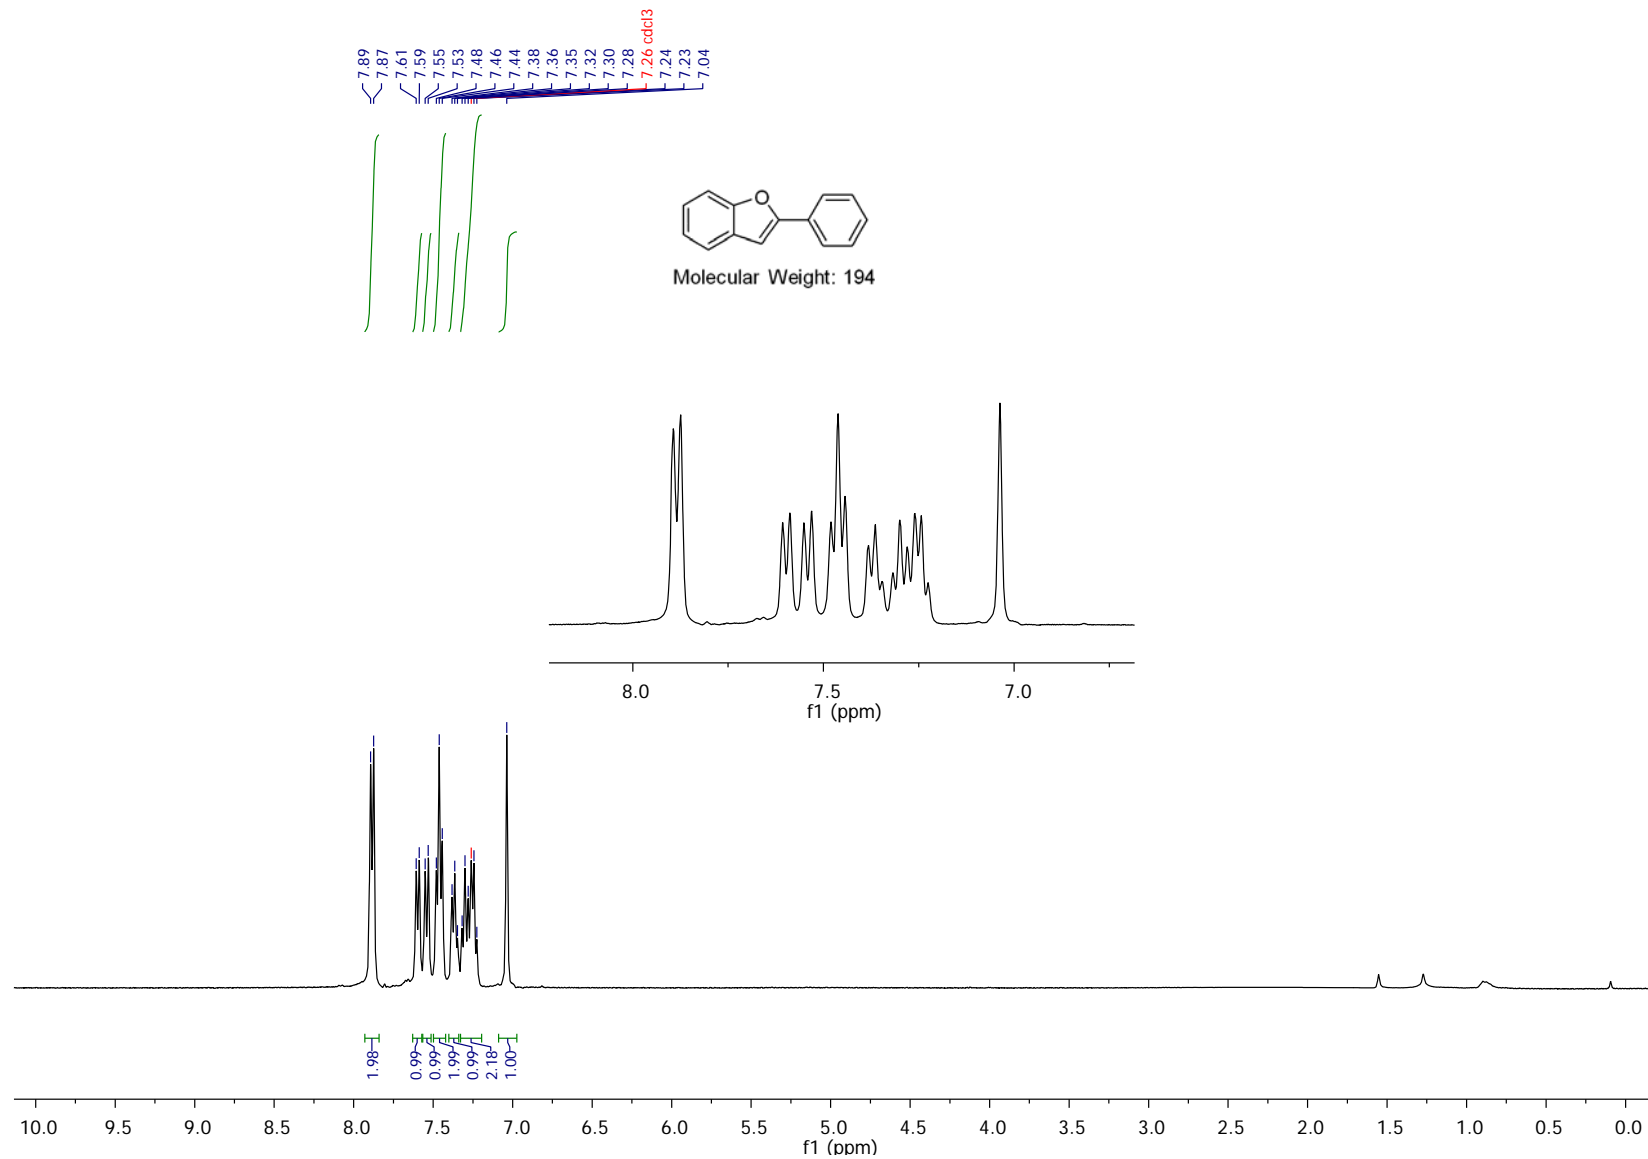

156.1  
155.1

130.7  
129.4  
129.0  
128.7  
125.1  
124.4  
123.1  
121.1

111.4

101.5

77.5 CDCl3  
77.2 CDCl3  
76.9 CDCl3

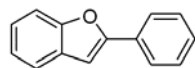

Molecular Weight: 194

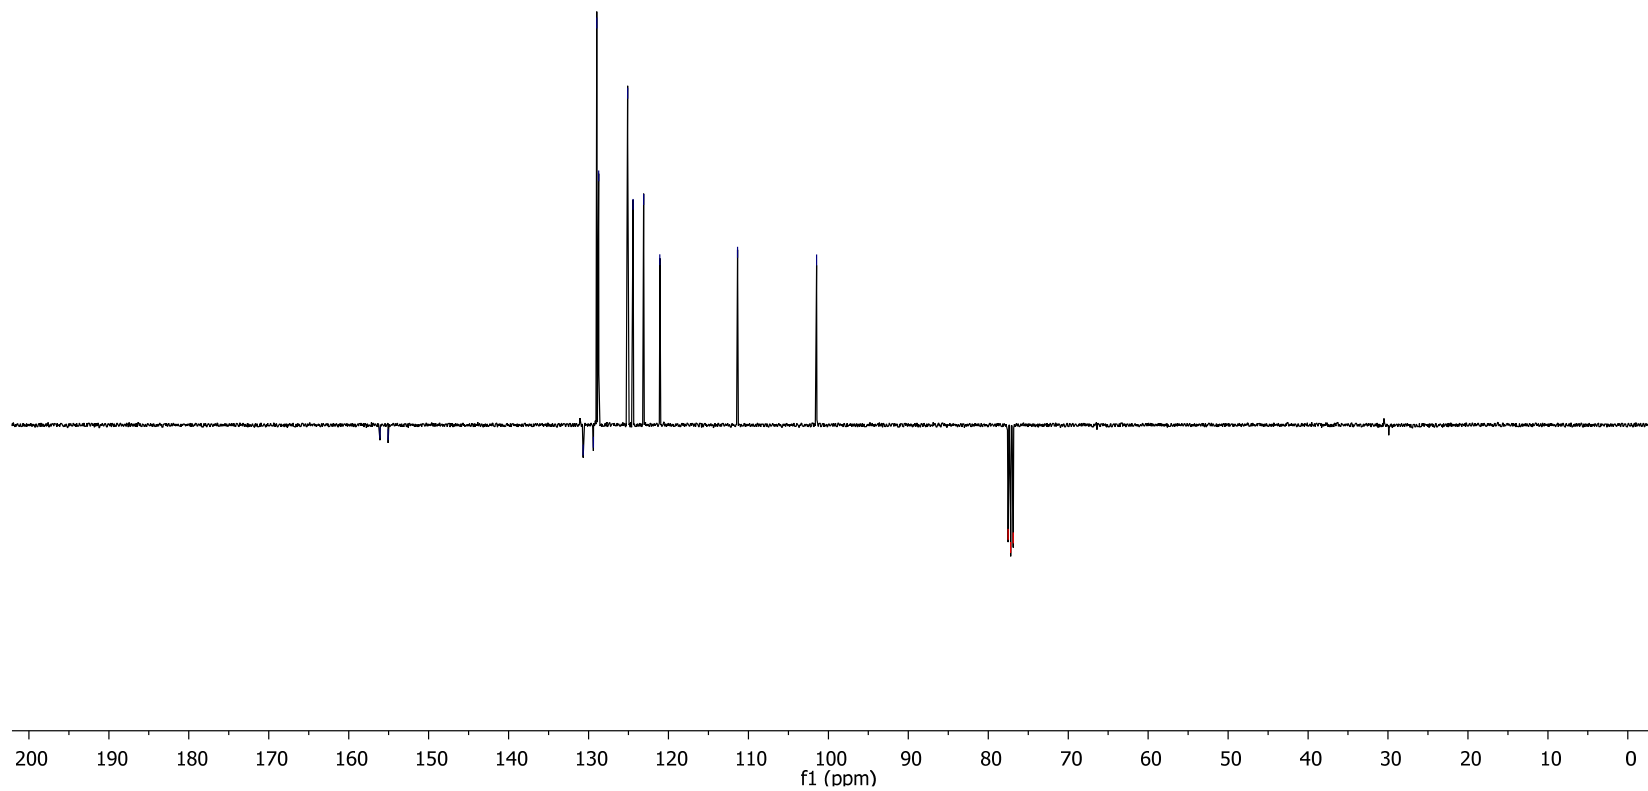

2-(3-chloro-4-methoxyphenyl)benzofuran (6b)

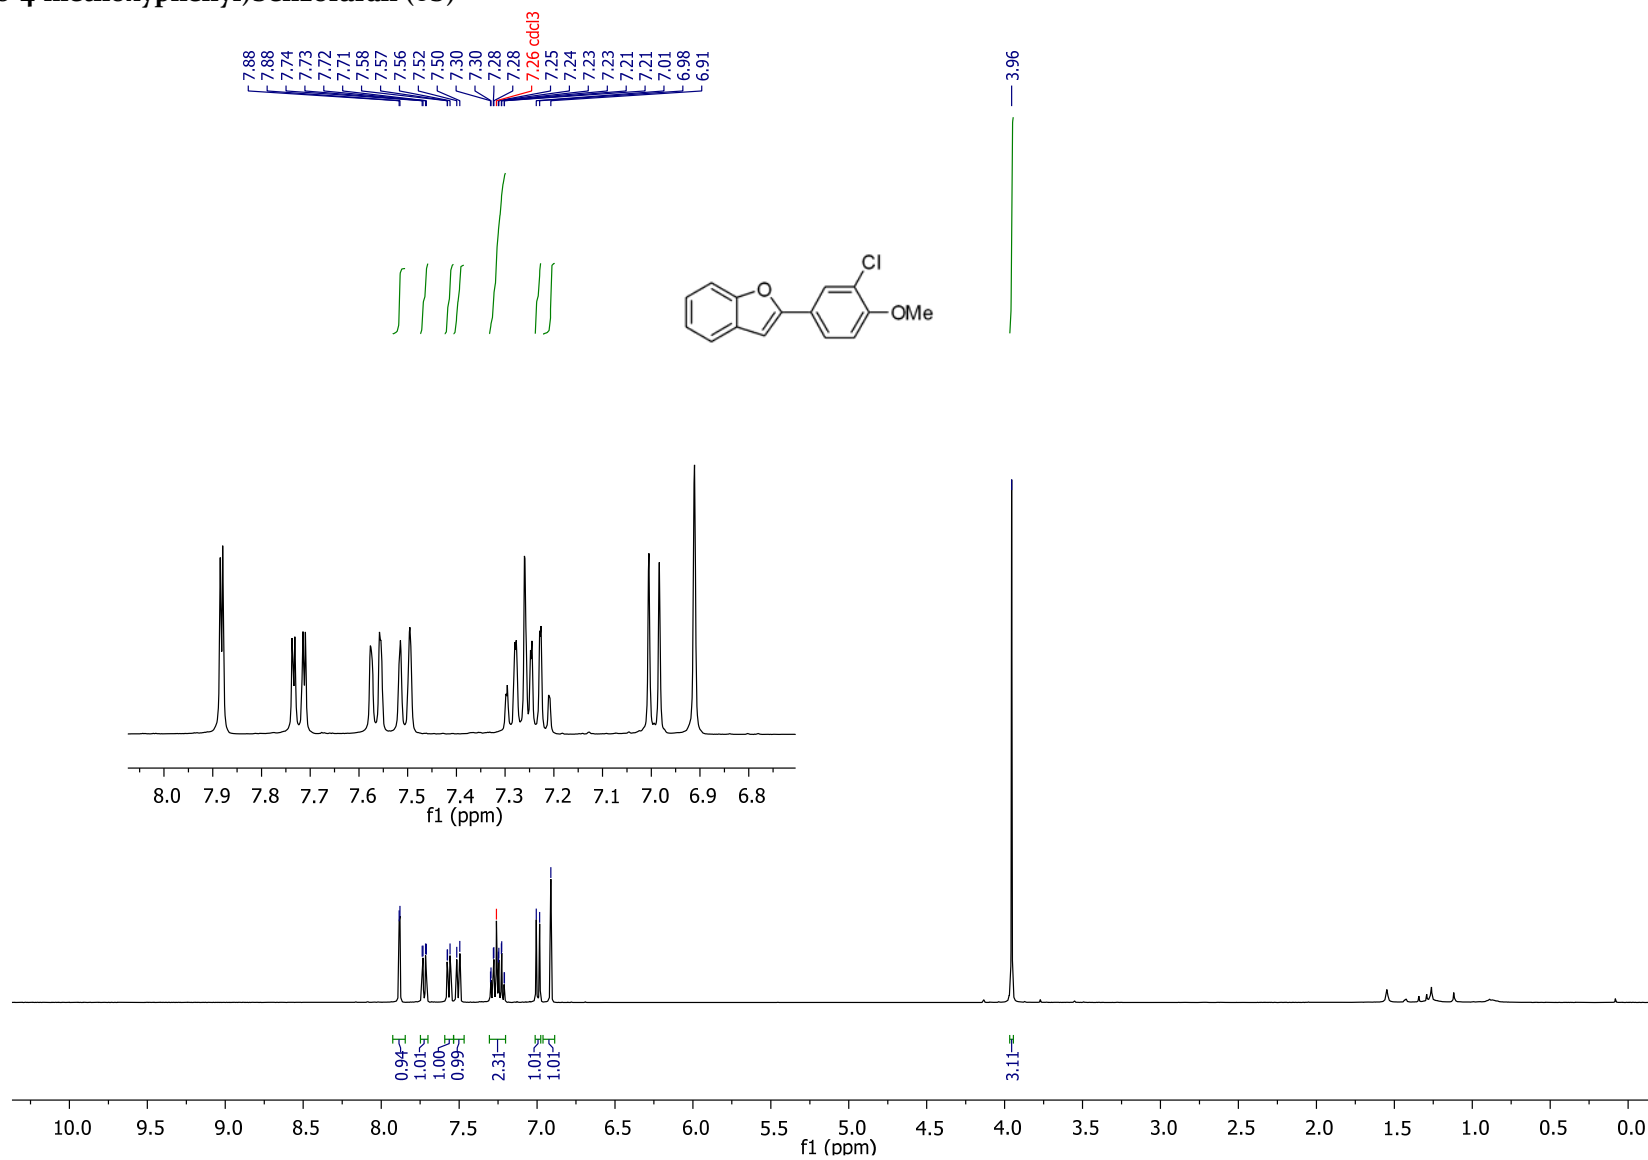

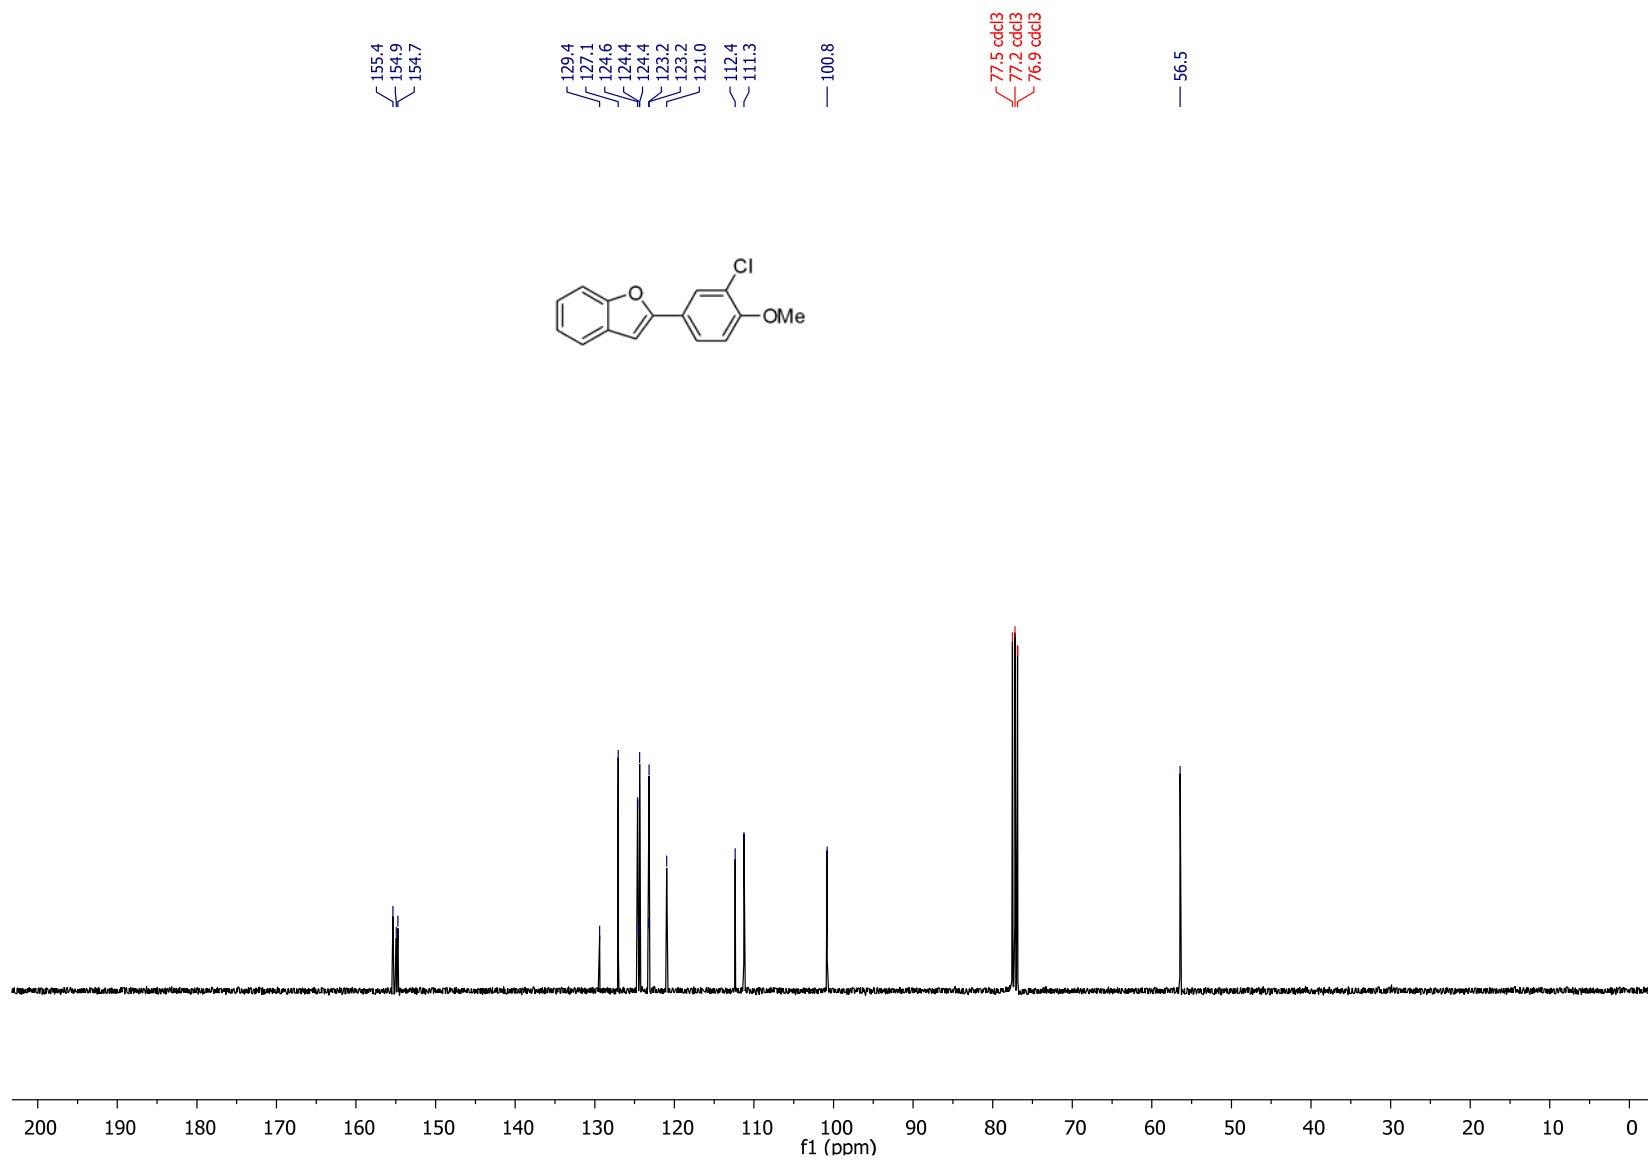

2-(4-fluorophenyl)benzofuran (6c)

7.87  
7.86  
7.85  
7.84  
7.84  
7.83  
7.82  
7.59  
7.59  
7.57  
7.57  
7.53  
7.51  
7.51  
7.31  
7.31  
7.29  
7.29  
7.29  
7.27  
7.27  
7.26  
7.26  
7.26  
7.25  
7.25  
7.24  
7.23  
7.22  
7.22  
7.18  
7.17  
7.16  
7.15  
7.15  
7.14  
7.13  
7.12  
6.96  
6.96

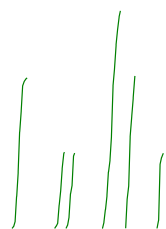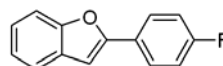

Molecular Weight: 212

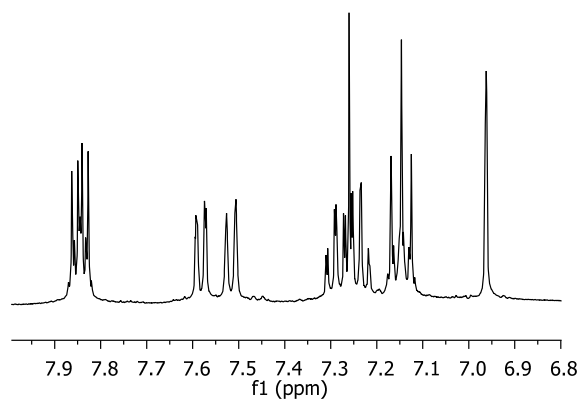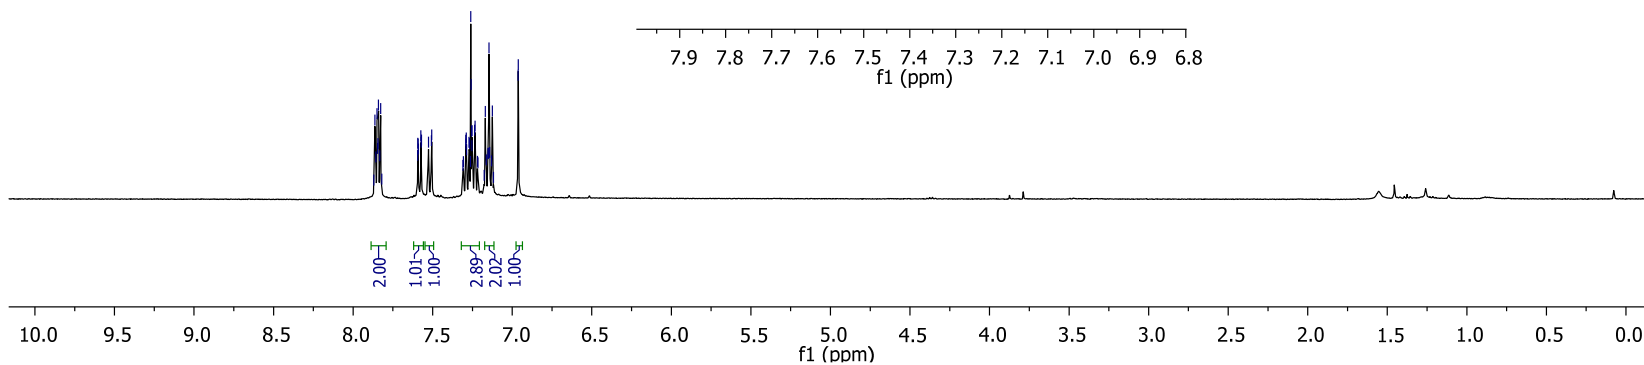

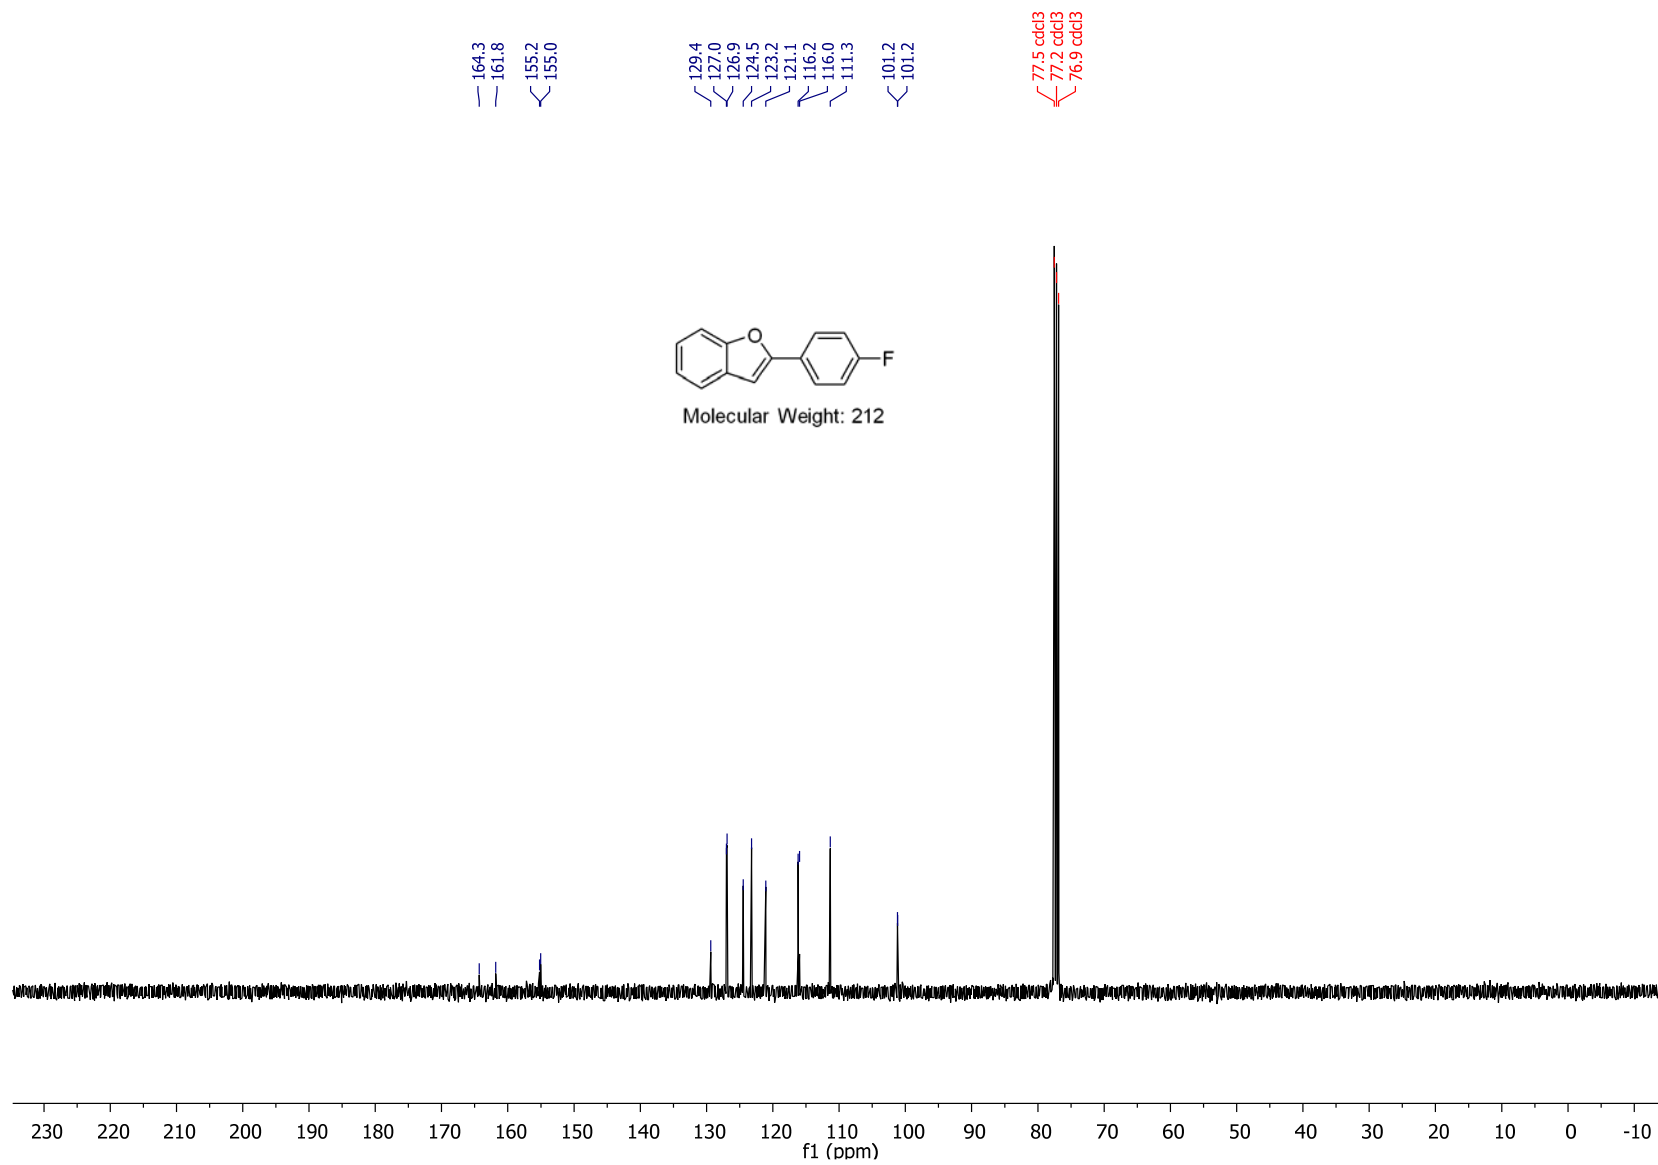

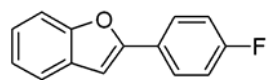

Chemical Formula: C<sub>14</sub>H<sub>9</sub>FO

Exact Mass: 212,0637

Molecular Weight: 212,2234

-112.4  
-112.4  
-112.4  
-112.4  
-112.4  
-112.4  
-112.5

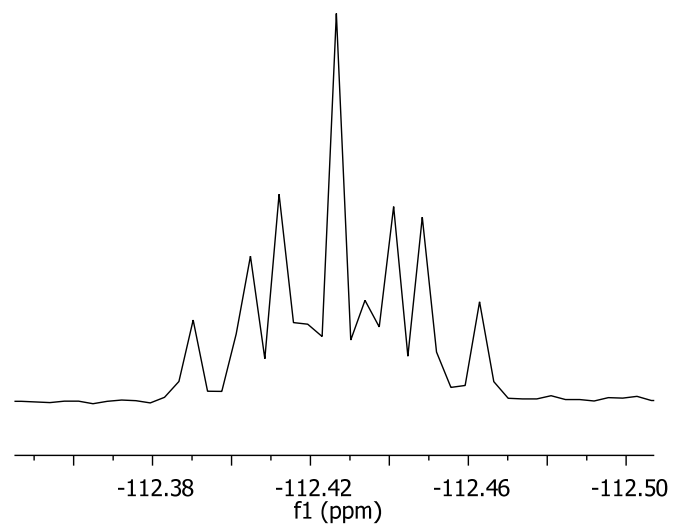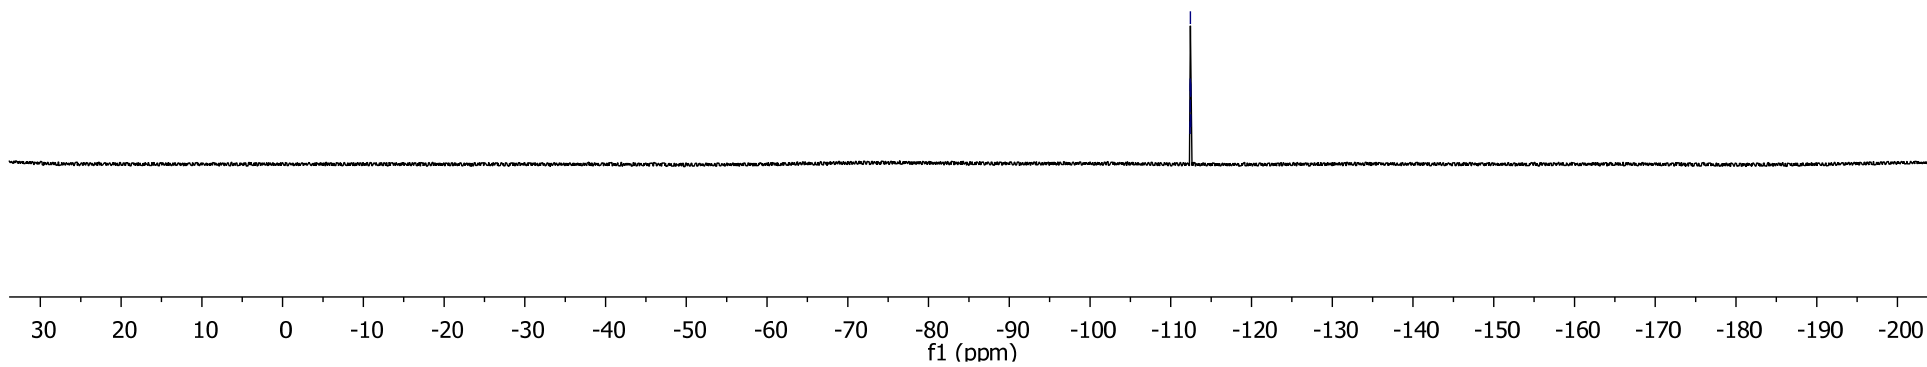



2-(4'-(trifluoromethyl)phenyl)benzofuran (6d)

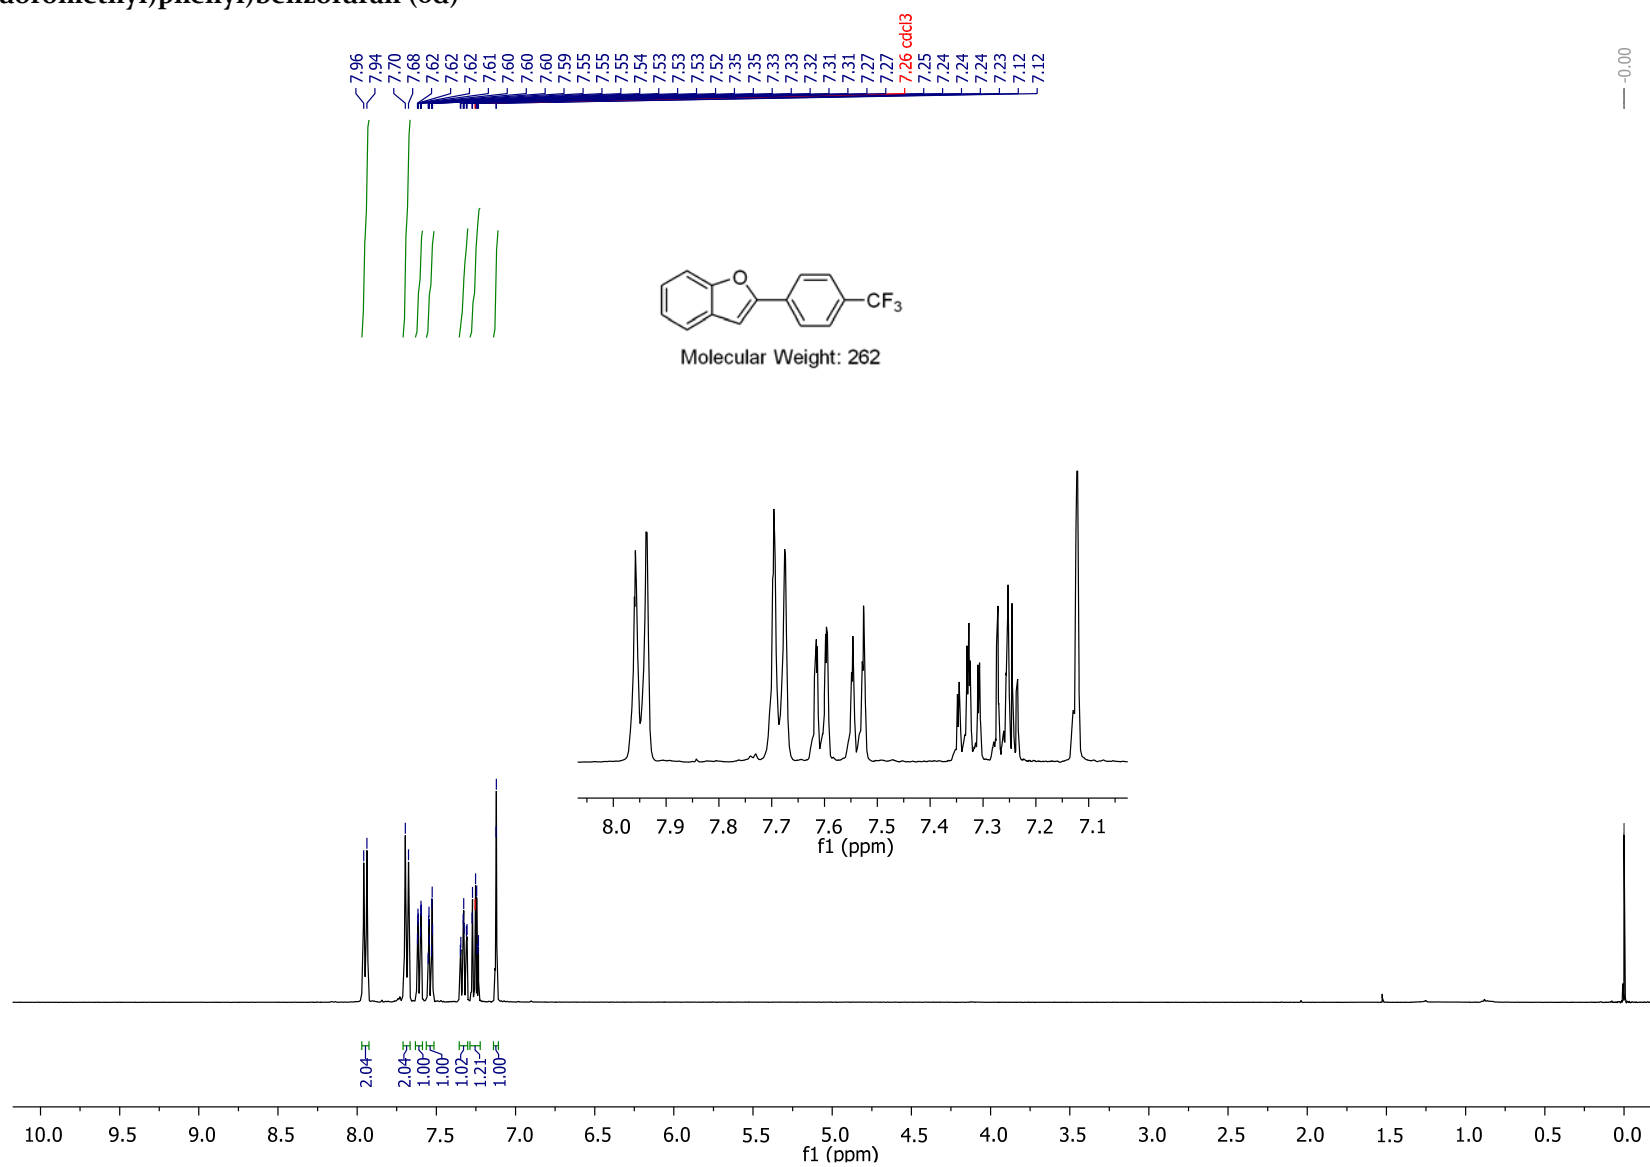

155.3  
154.4  
133.9  
130.5  
130.1  
129.0  
126.0  
126.0  
125.9  
125.3  
125.1  
123.4  
122.9  
121.5  
103.4

77.5 CDCl3  
77.2 CDCl3  
76.9 CDCl3

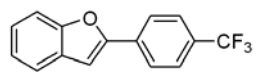

Molecular Weight: 262

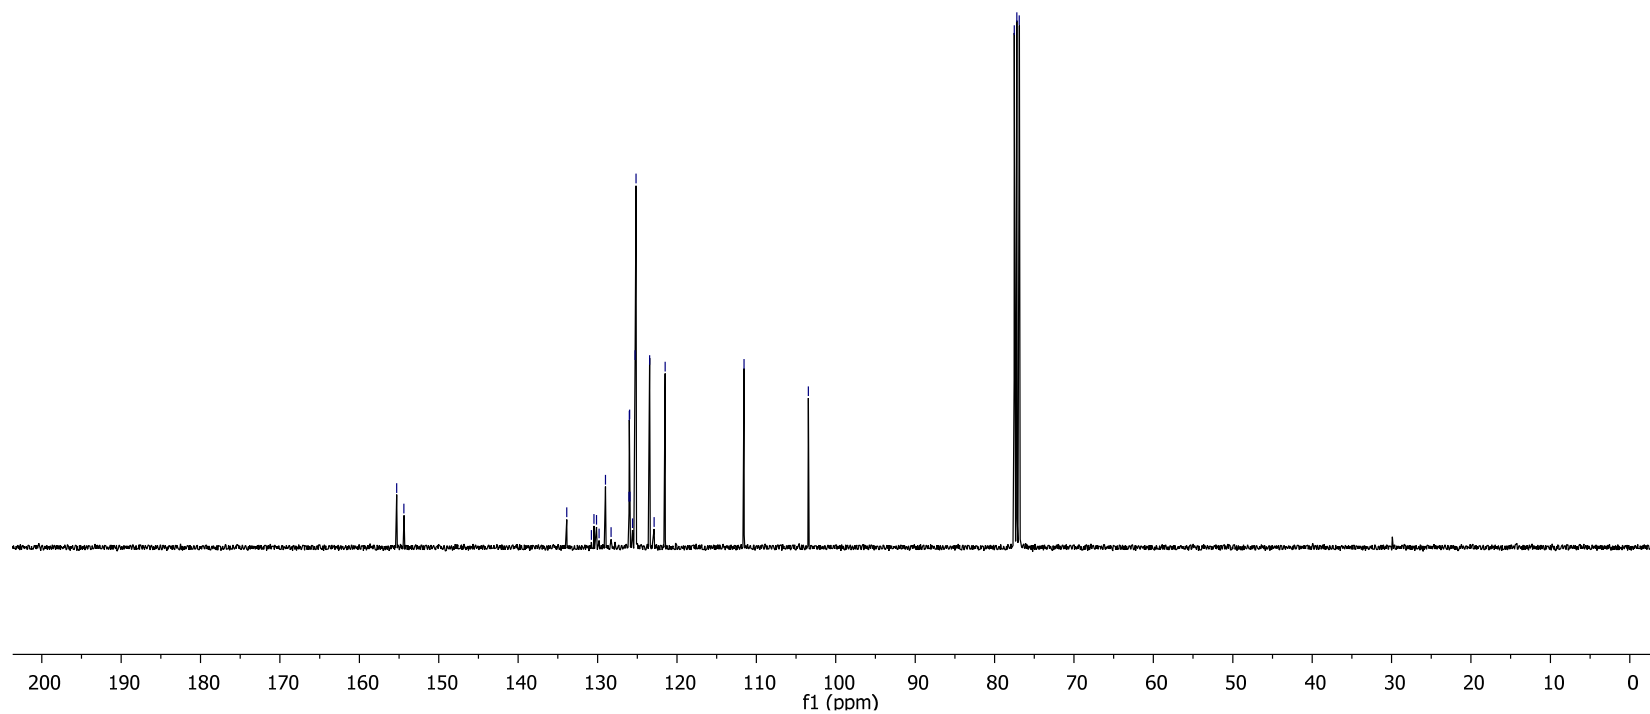

— -62.6

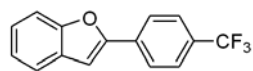

Molecular Weight: 262

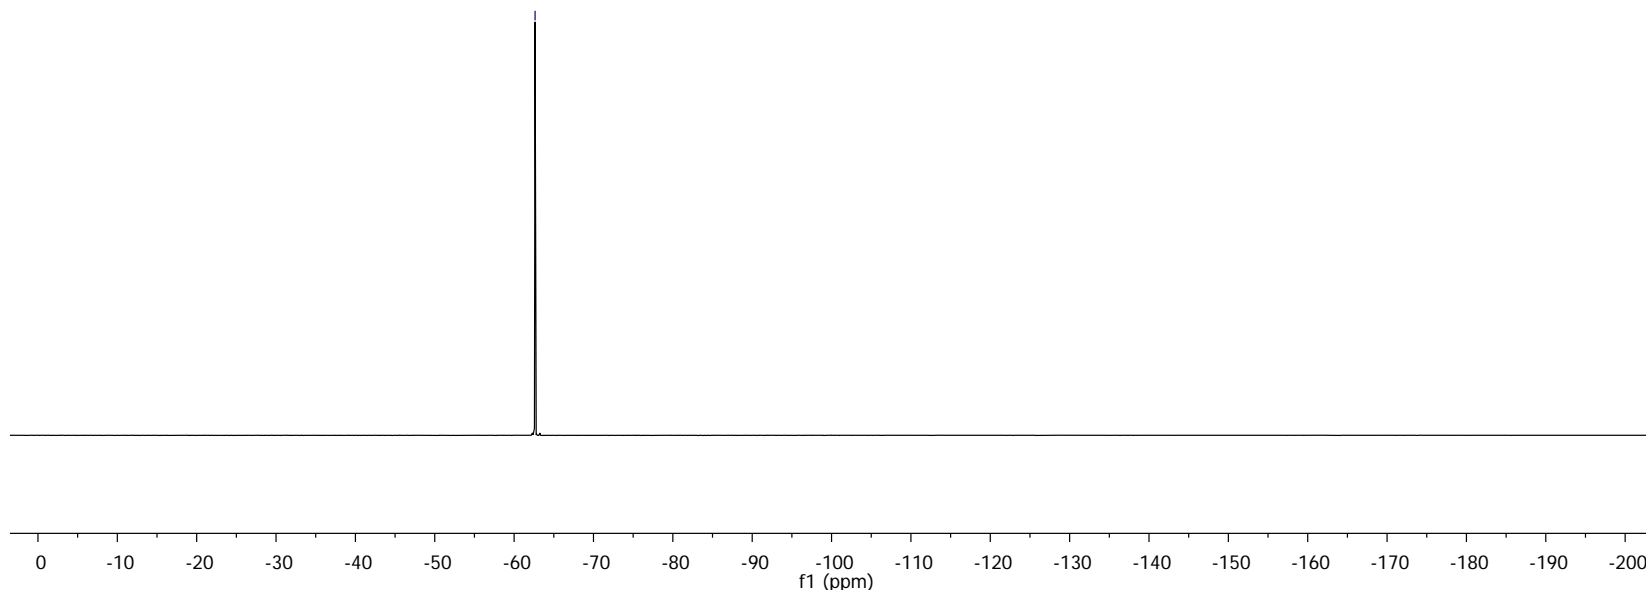

2-(3-(trifluoromethyl)phenyl)benzofuran (6e)

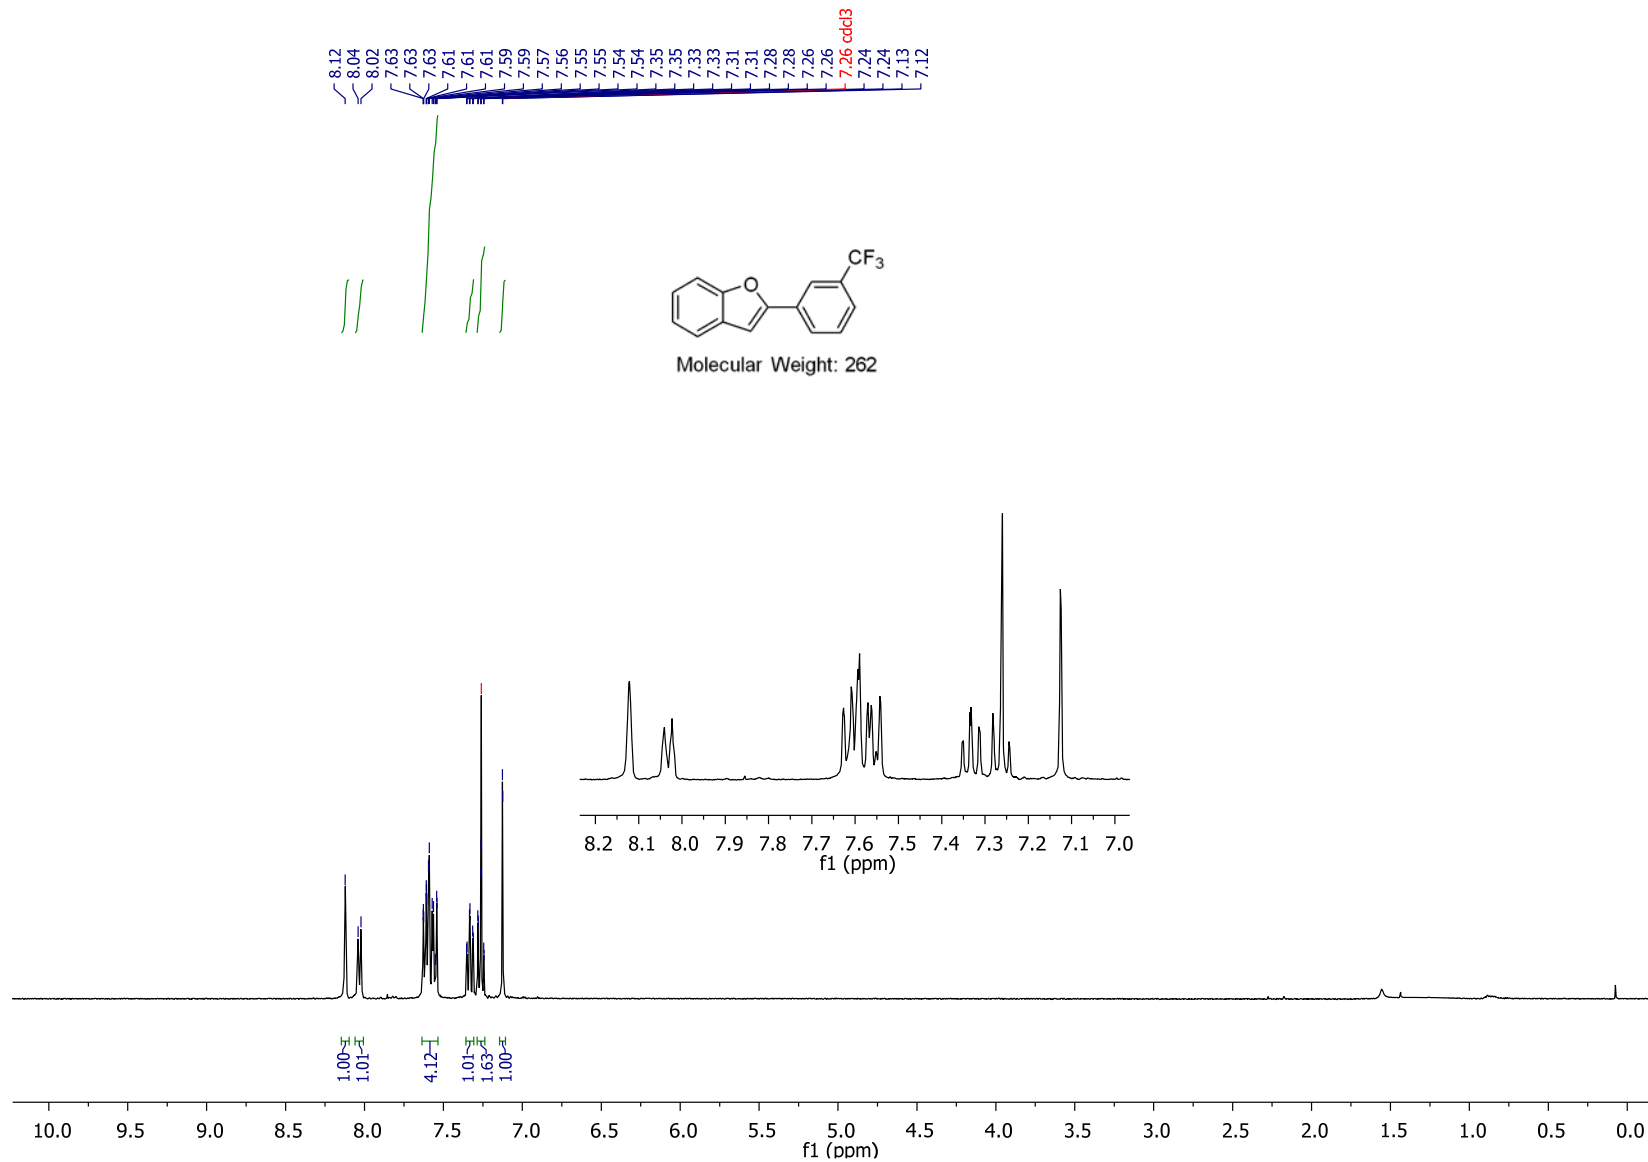

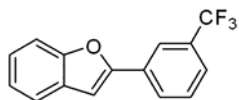

Chemical Formula: C<sub>15</sub>H<sub>9</sub>F<sub>3</sub>O  
Exact Mass: 262,0605  
Molecular Weight: 262,2312

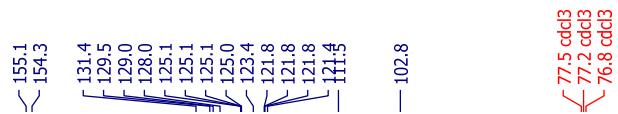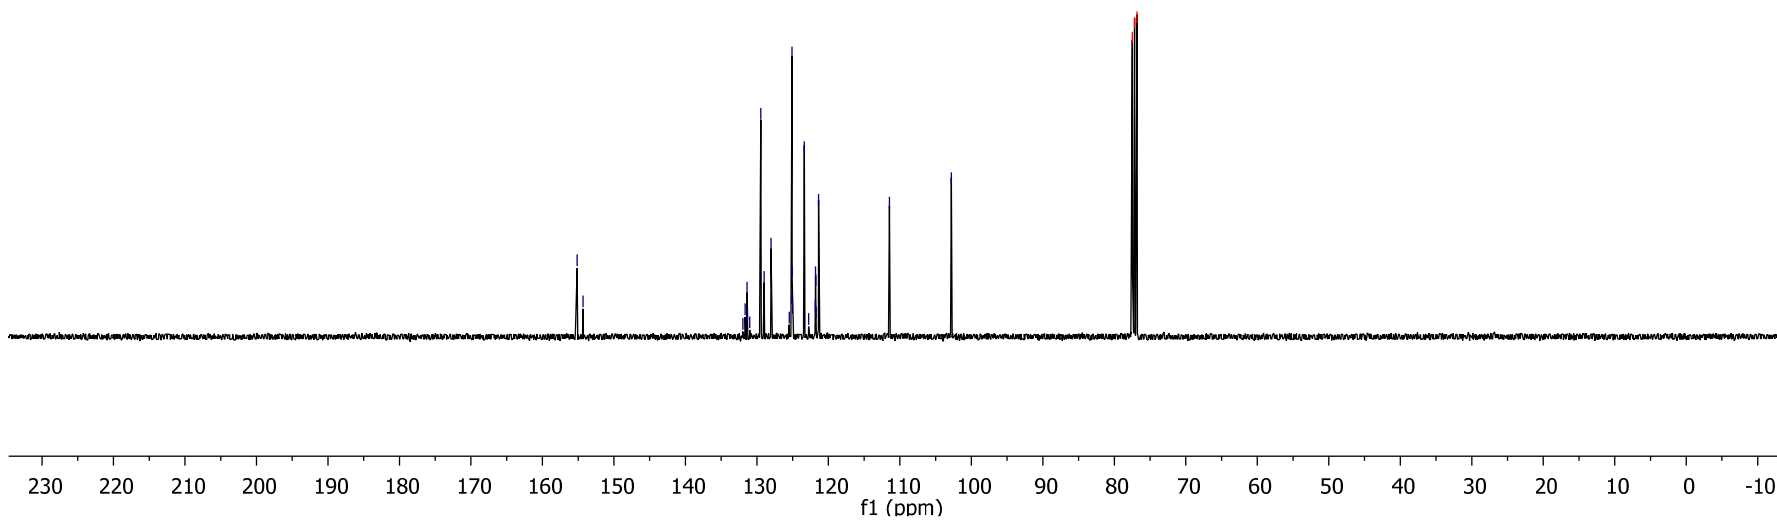

-62.88

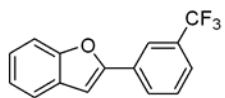

Molecular Weight: 262

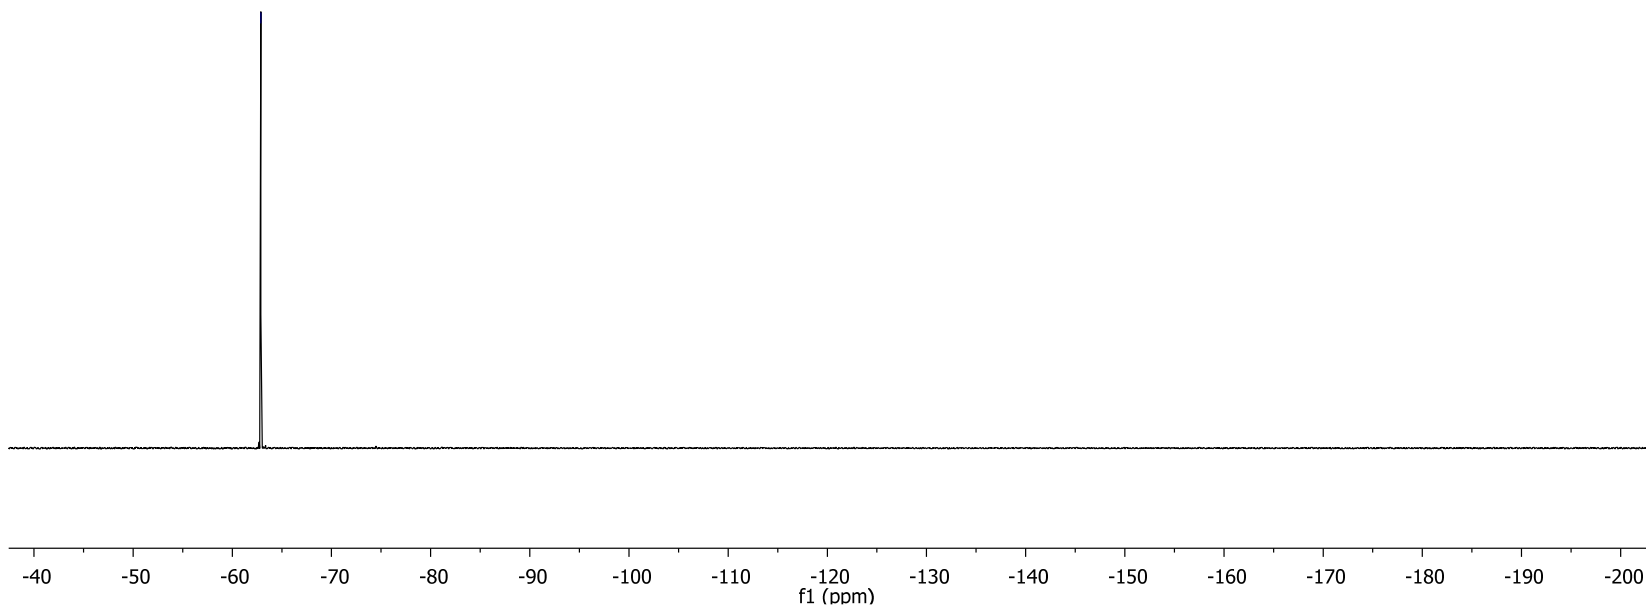

2-(4-(trifluoromethoxyphenyl) benzofuran (6f)

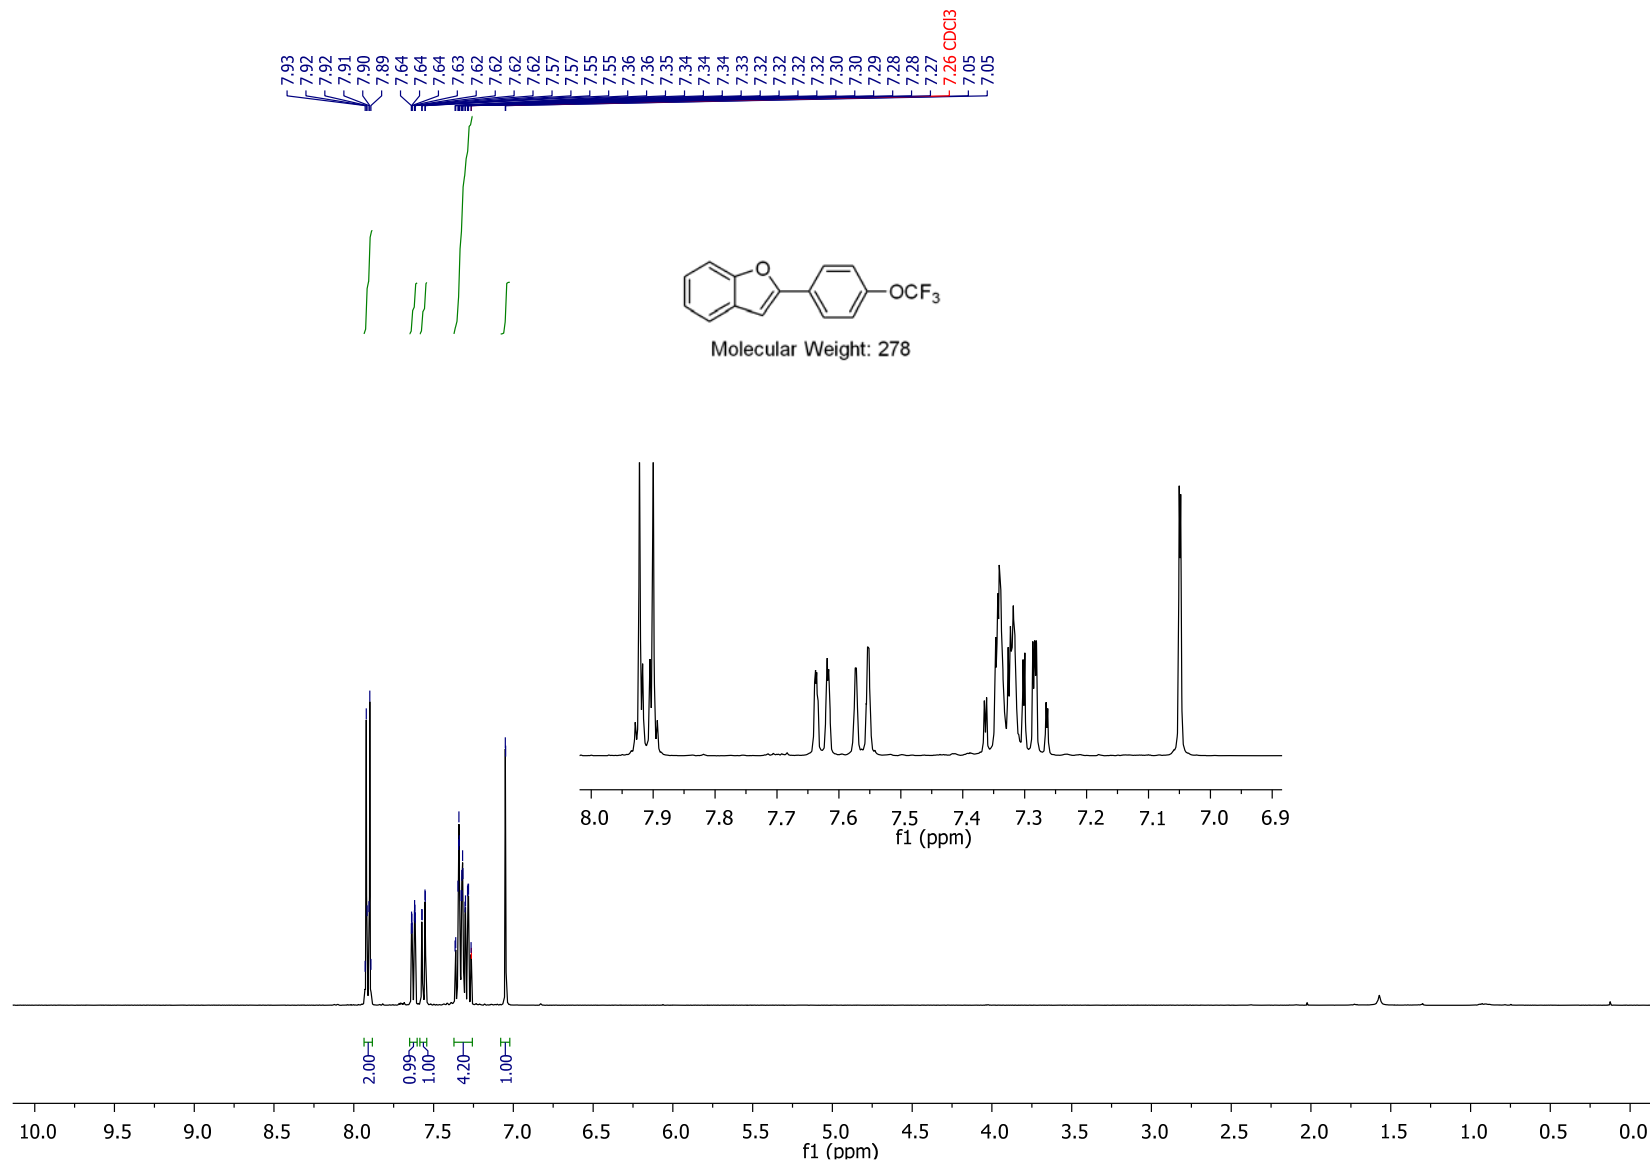

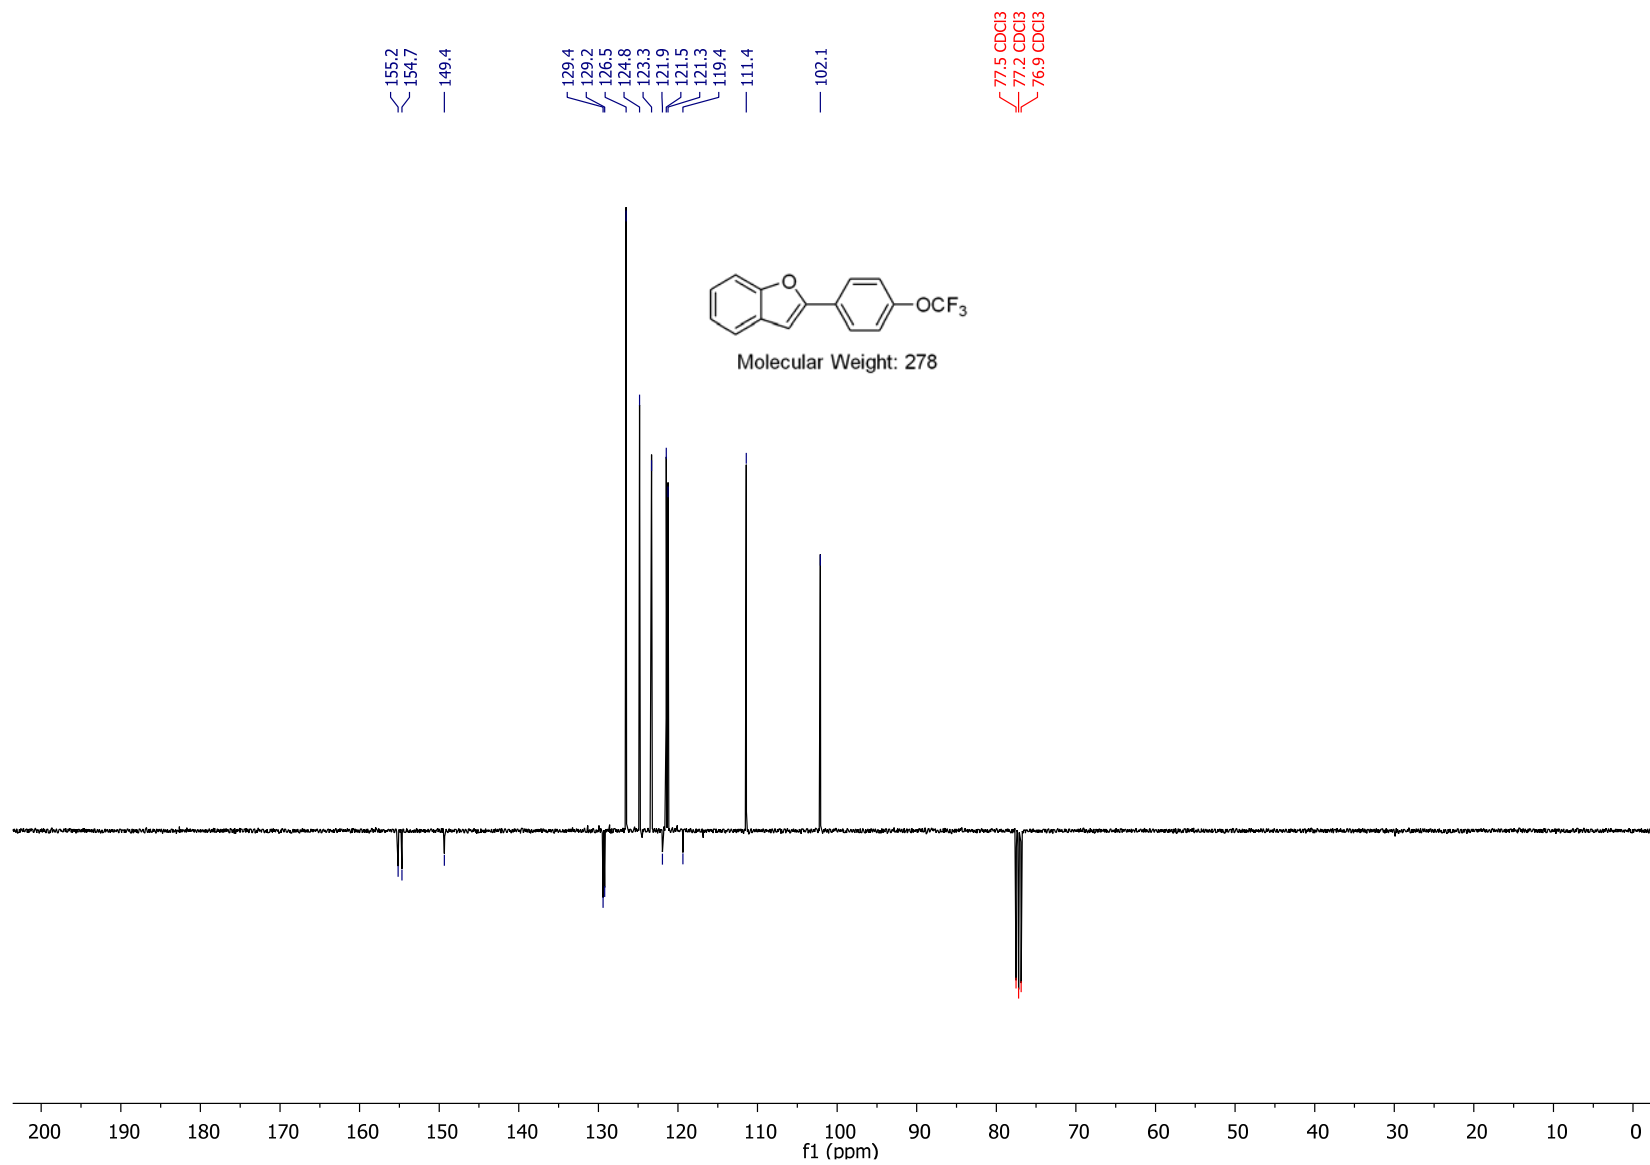



-57.8

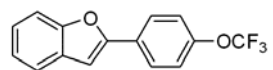

Molecular Weight: 278

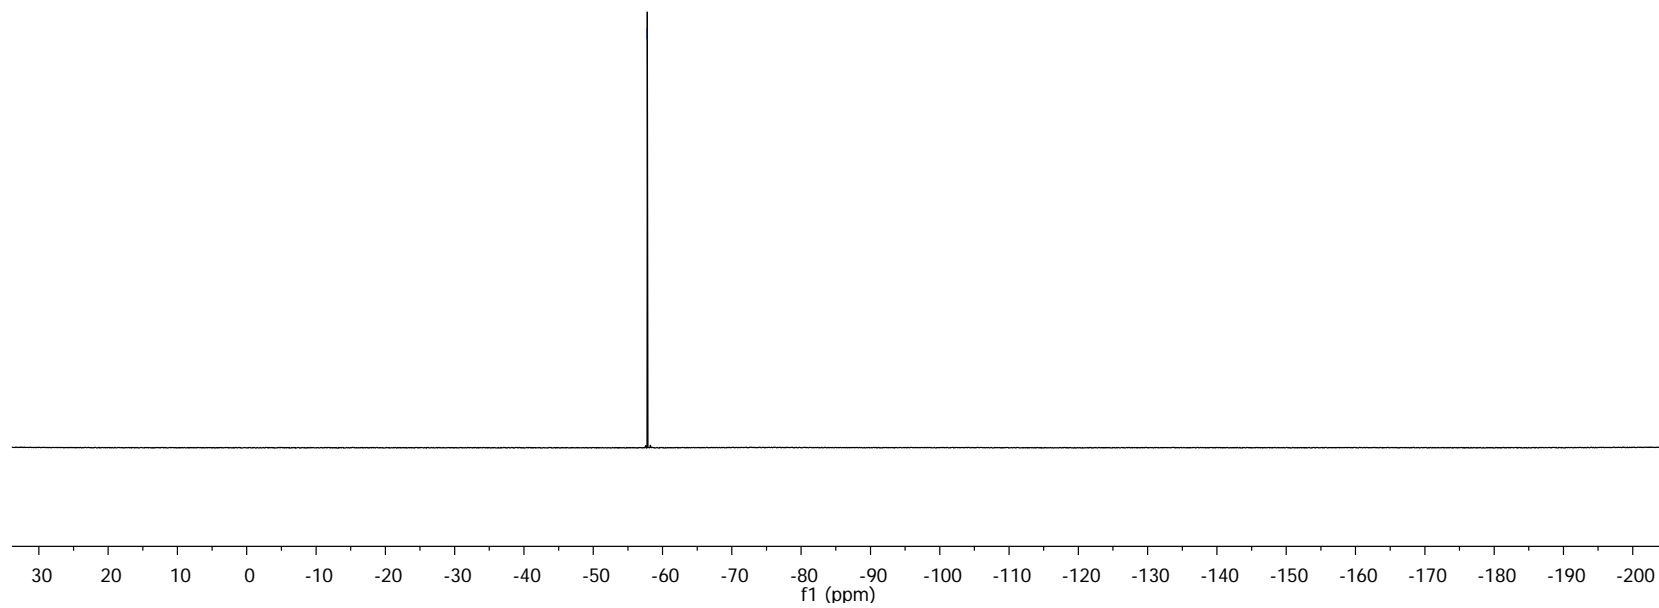

2-(2,3-dichlorophenyl)benzofuran (6g)

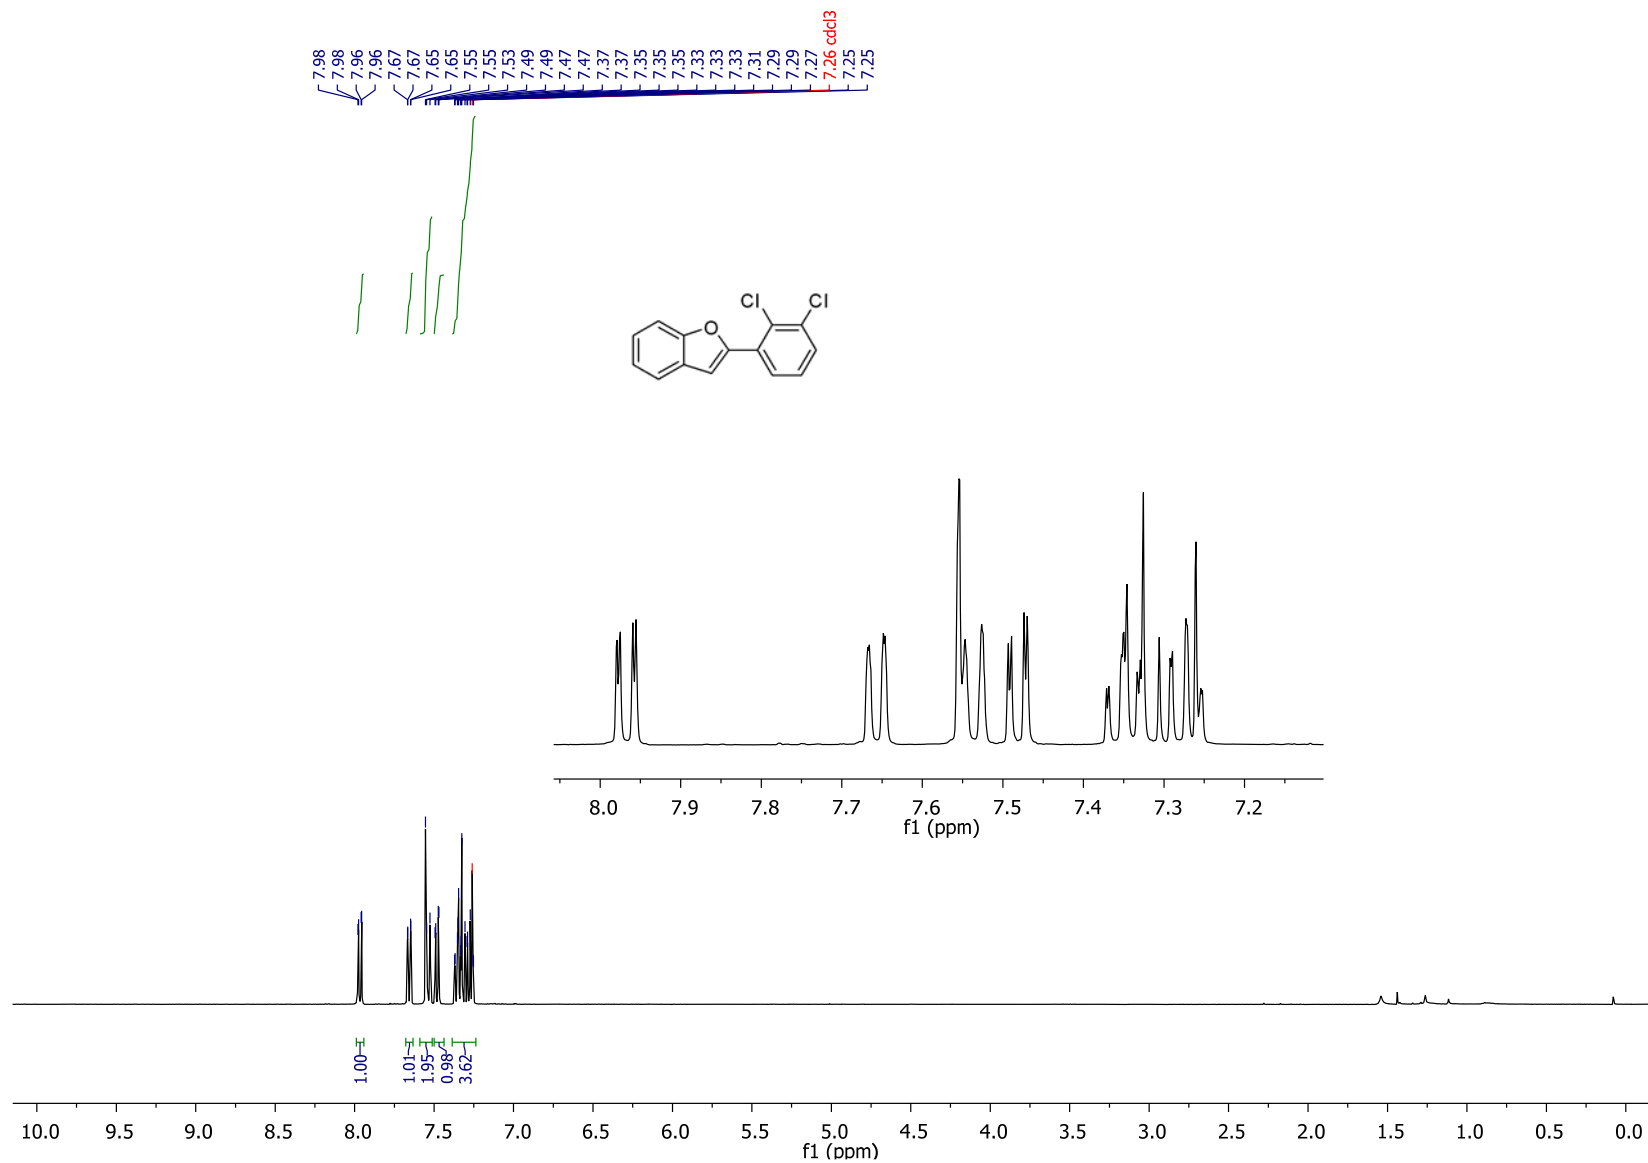

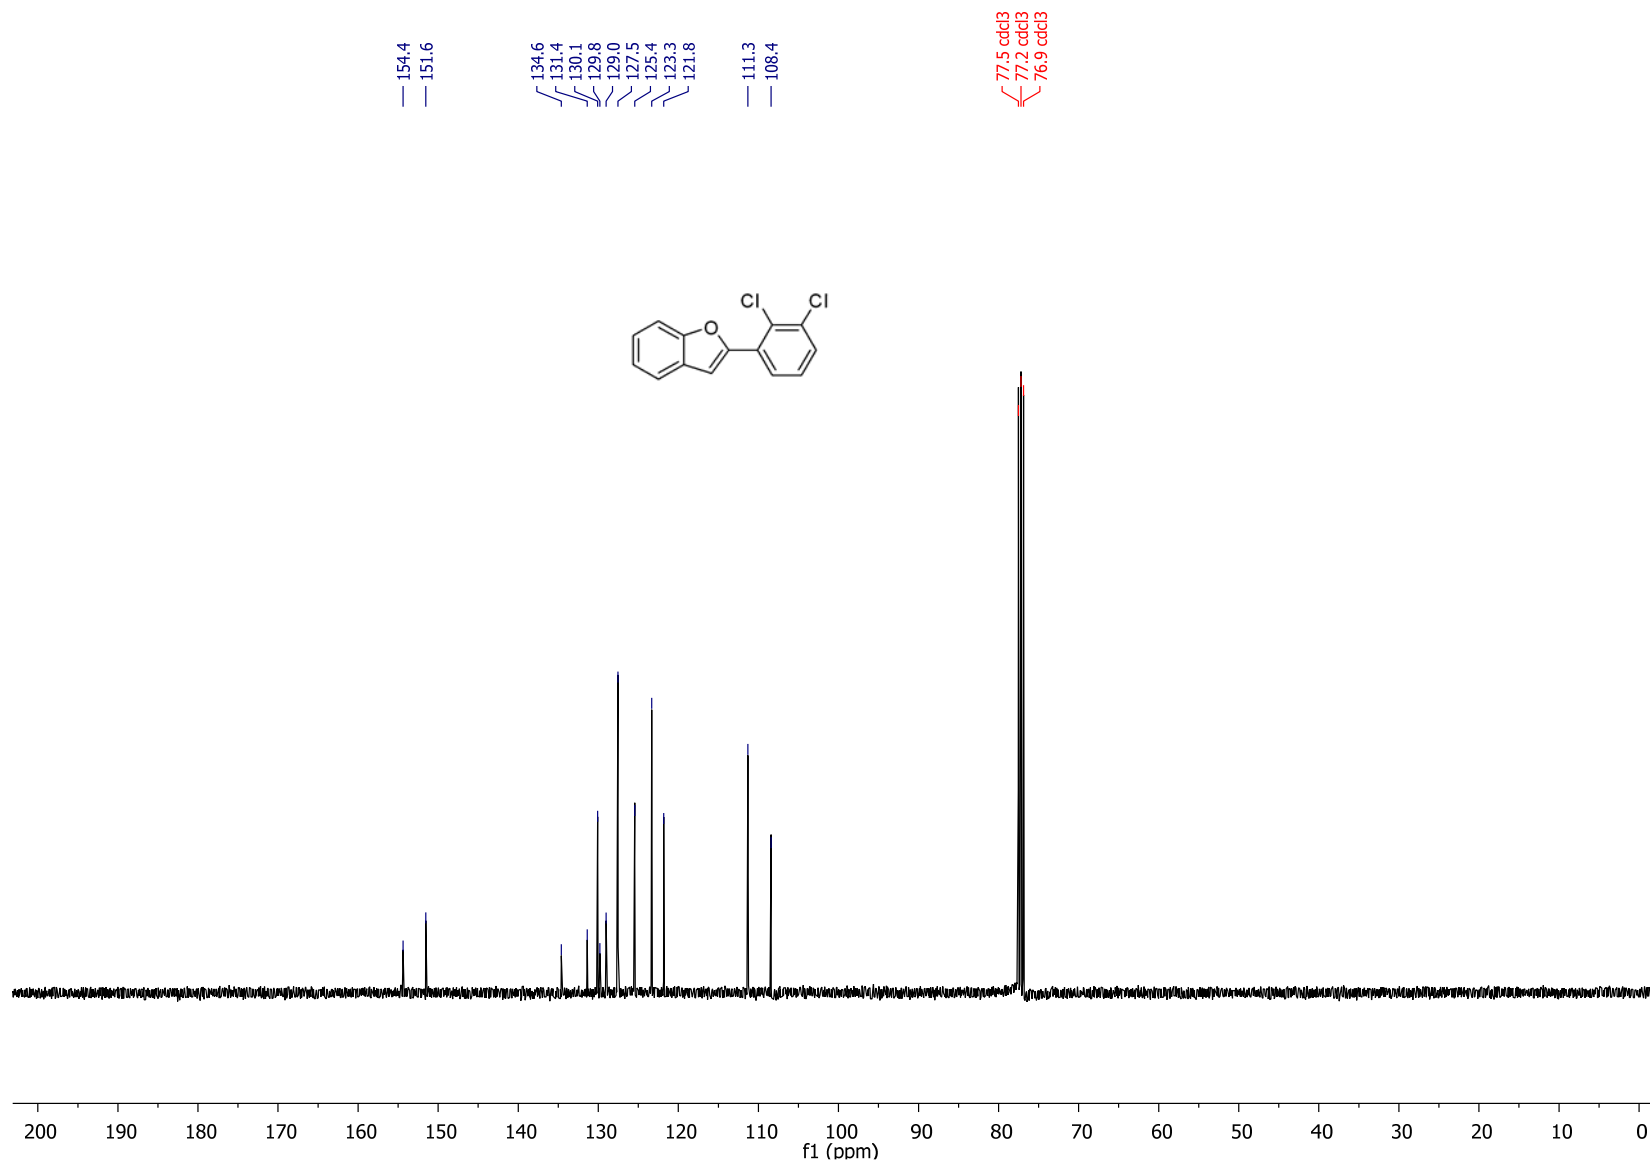

2-(3,5-dichlorophenyl)benzofuran (6h)

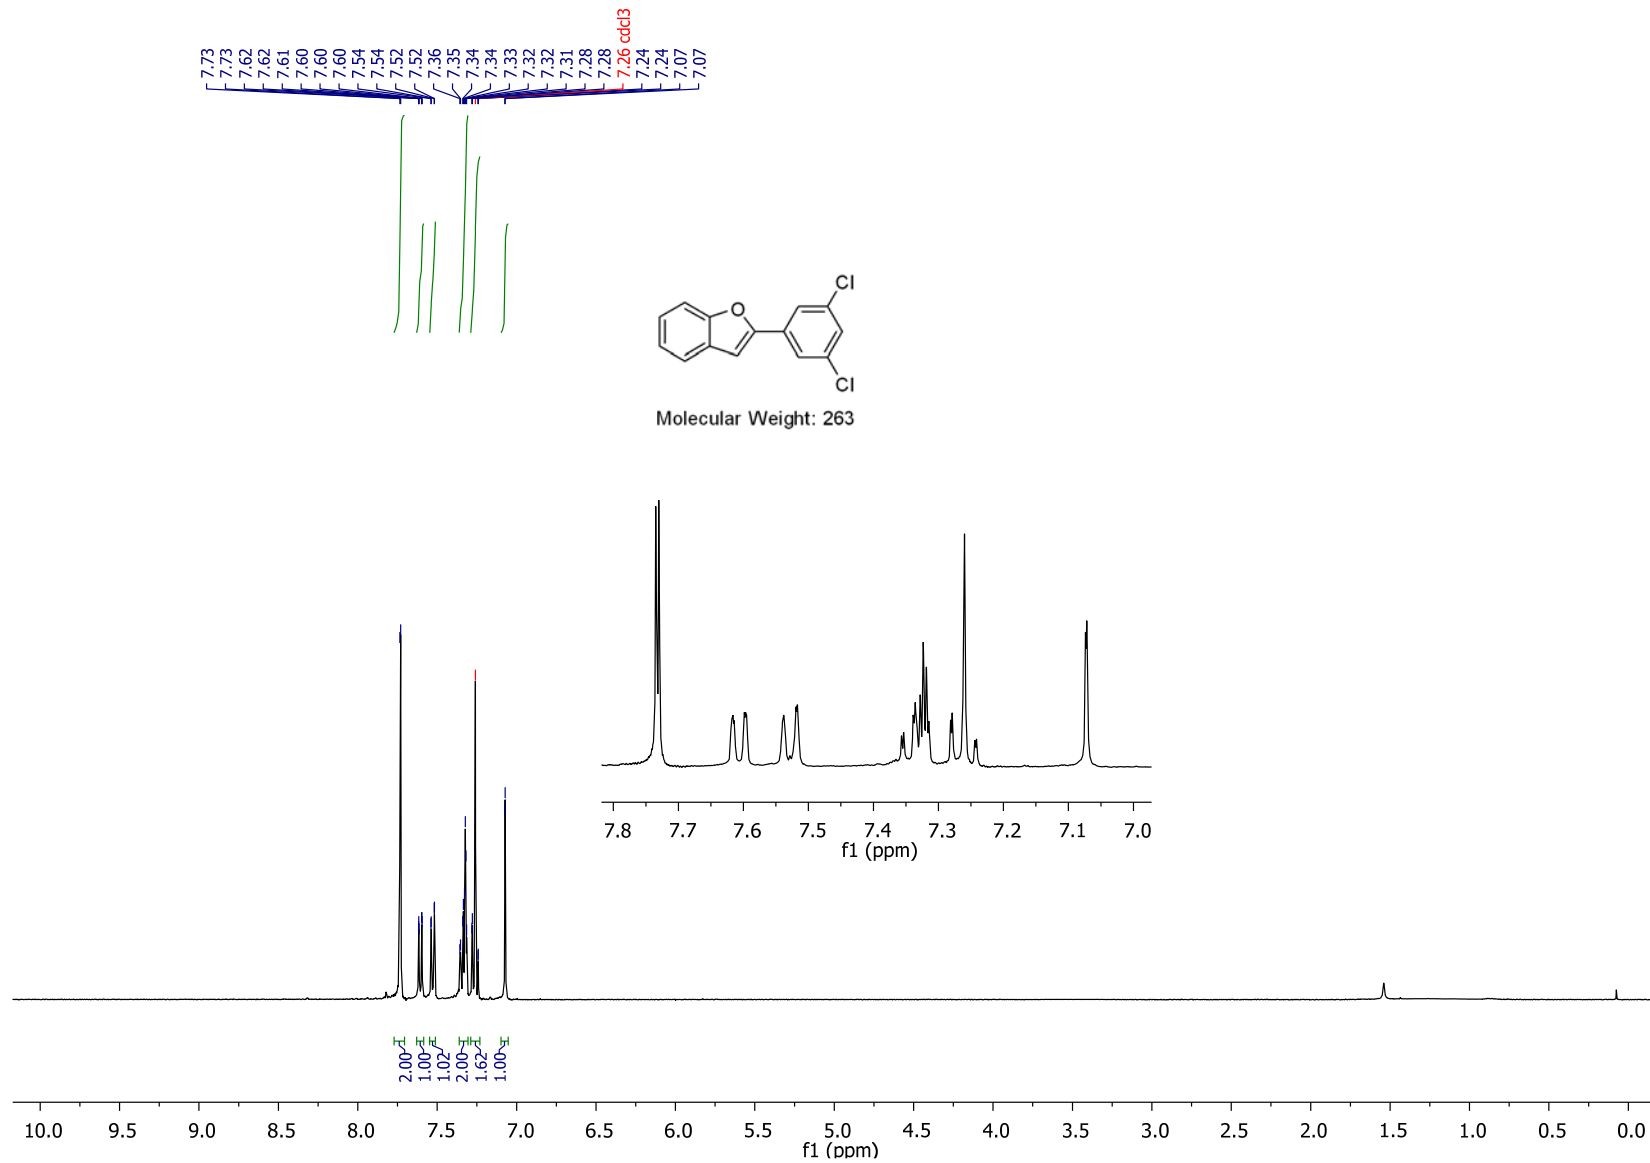

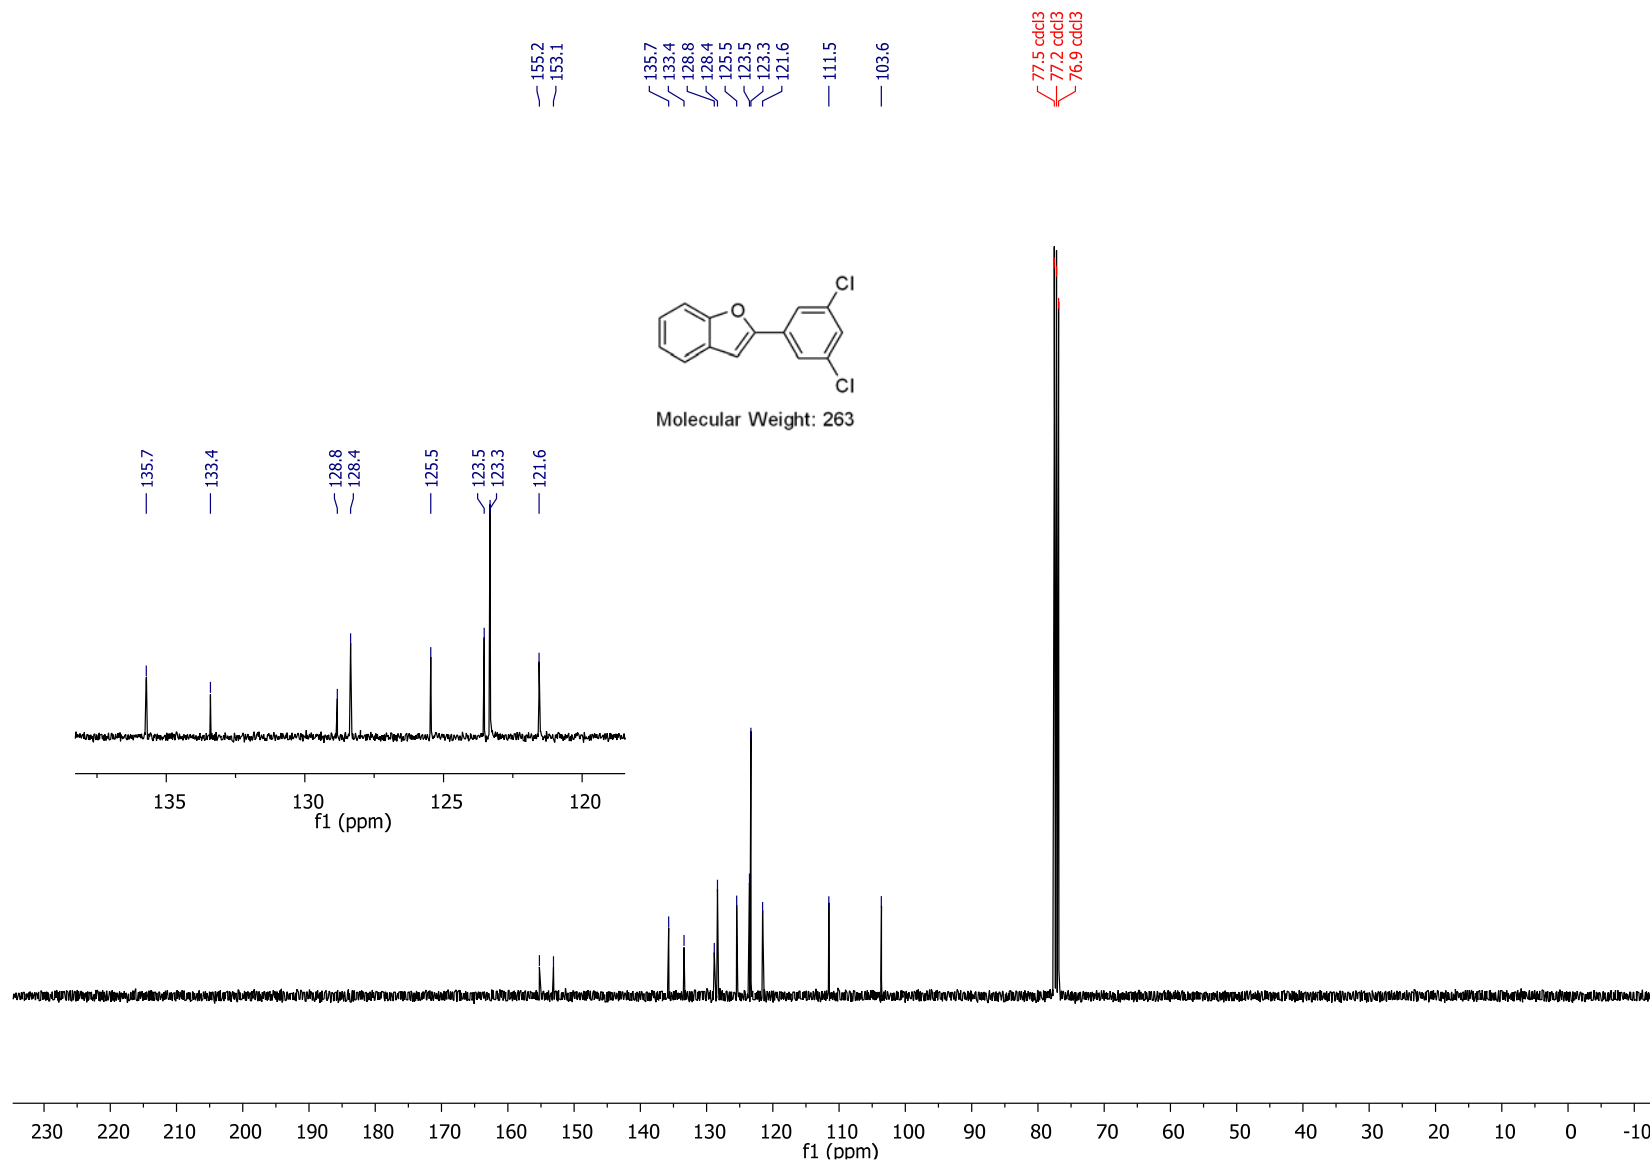

3-(3-(trifluoromethyl)phenyl)benzo[b]thiophene (7a)

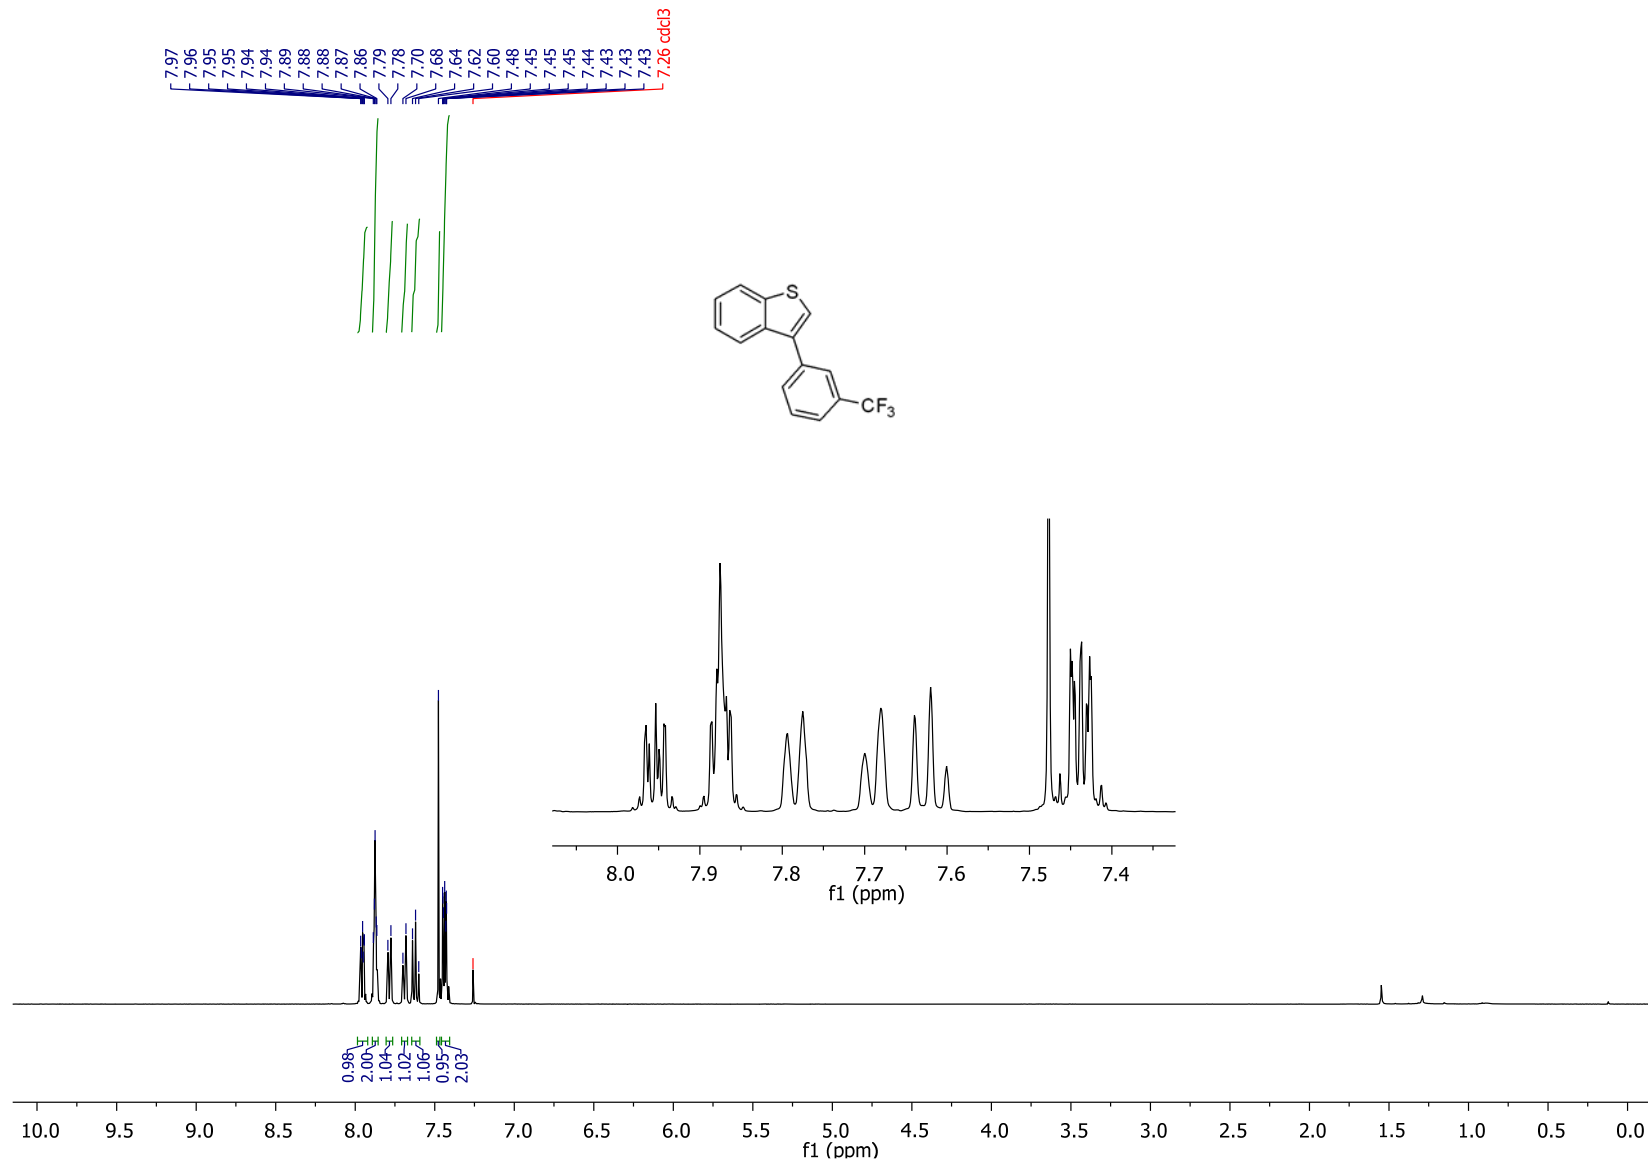

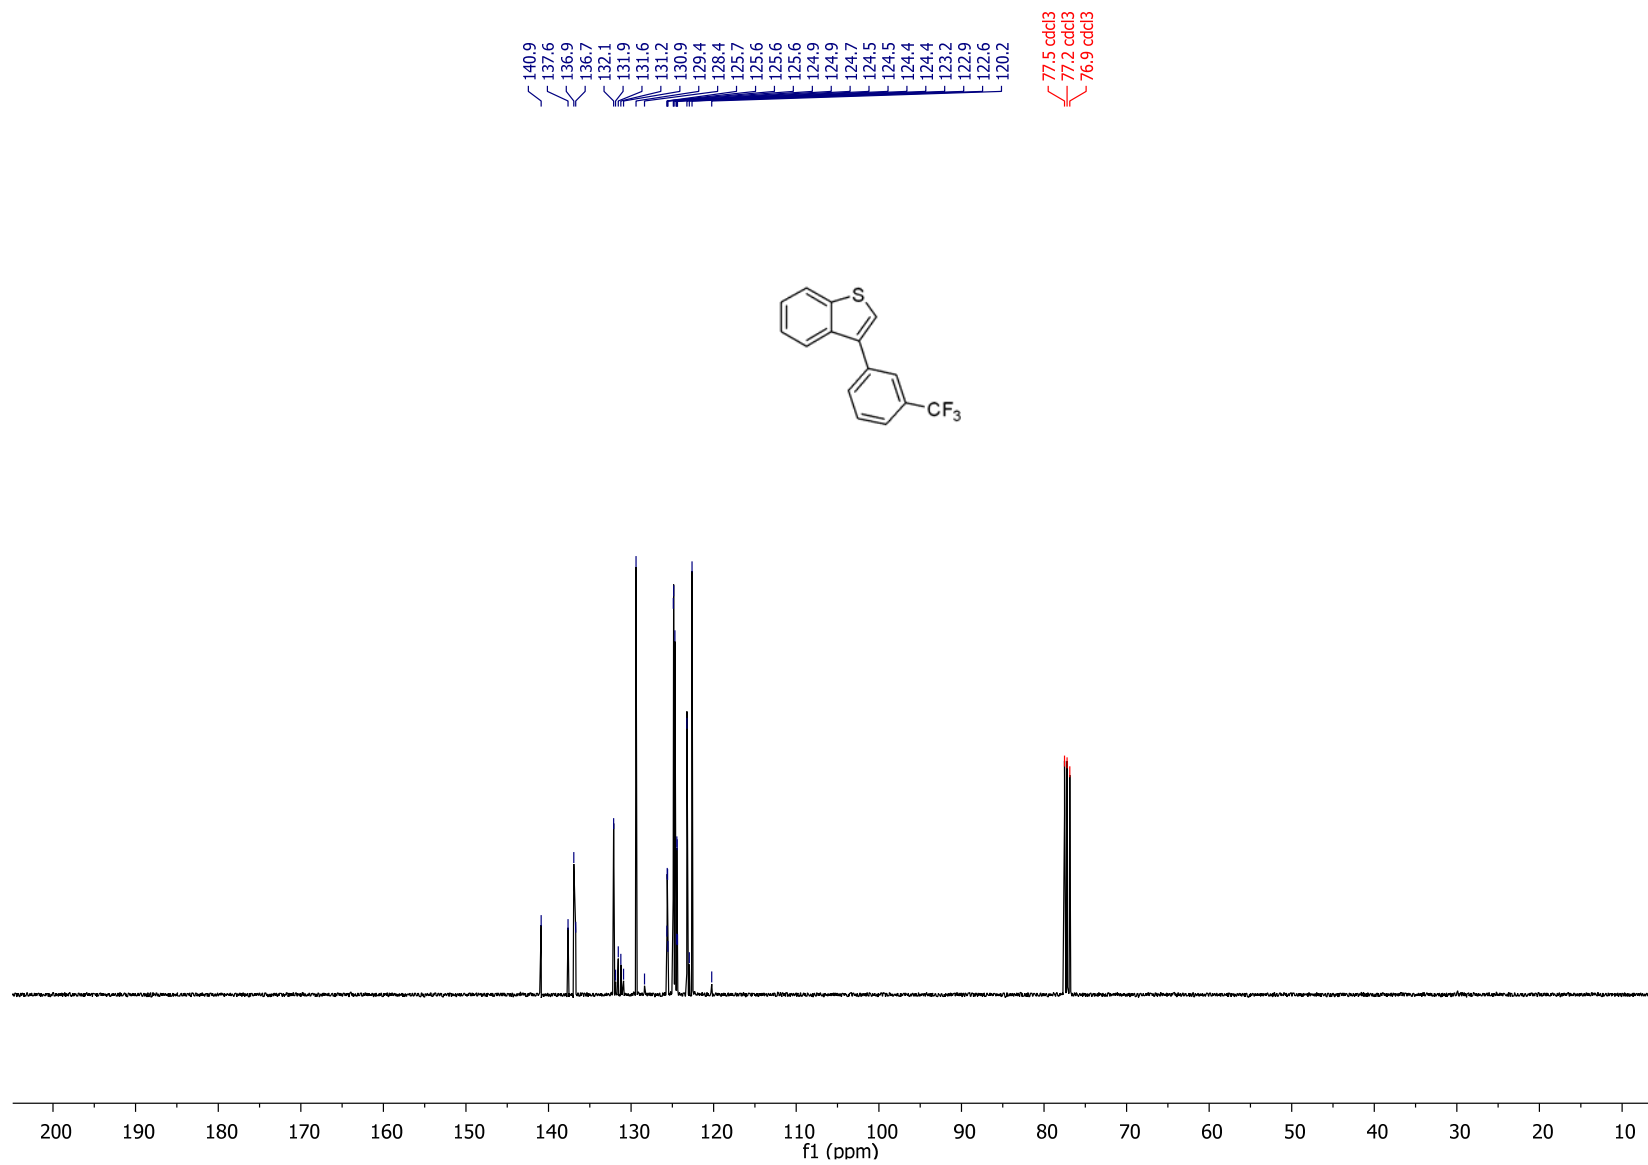

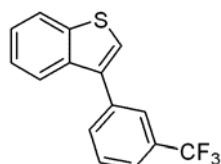

Chemical Formula: C<sub>15</sub>H<sub>9</sub>F<sub>3</sub>S  
Exact Mass: 278,0377  
Molecular Weight: 278,2922

-62.6

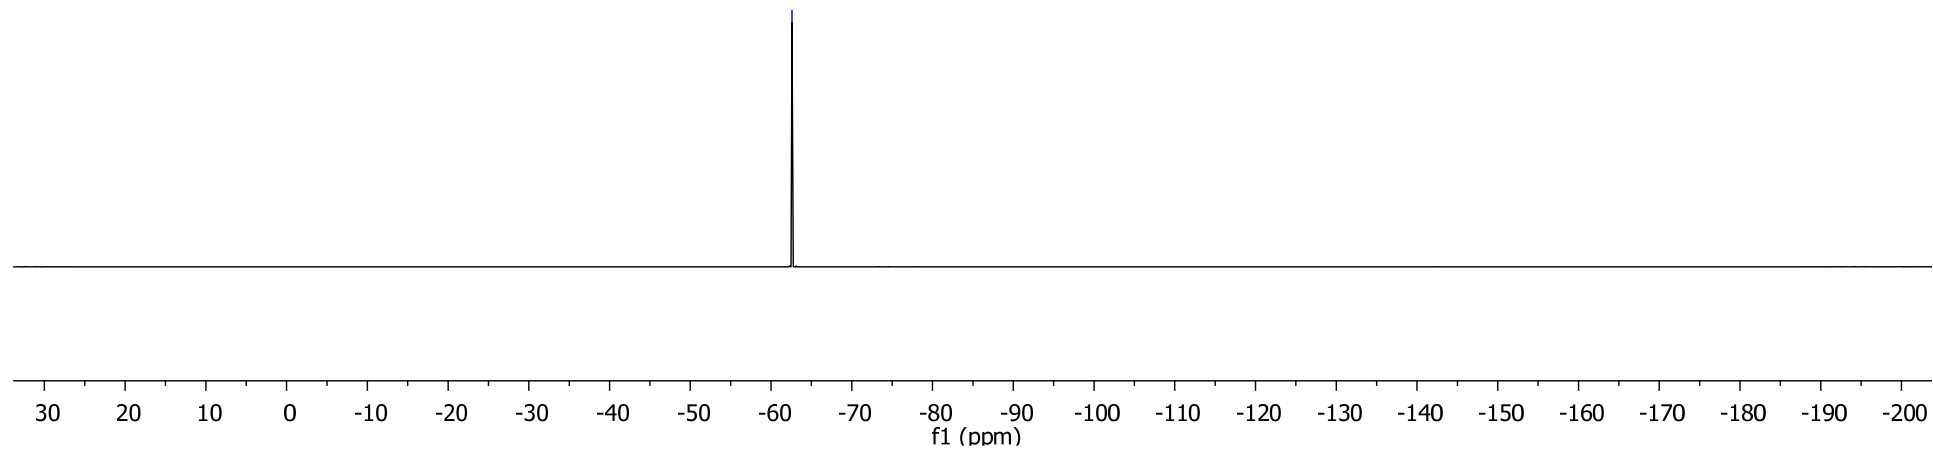



3-(4-(trifluoromethoxy)phenyl)benzo[*b*]thiophene (**7b**)

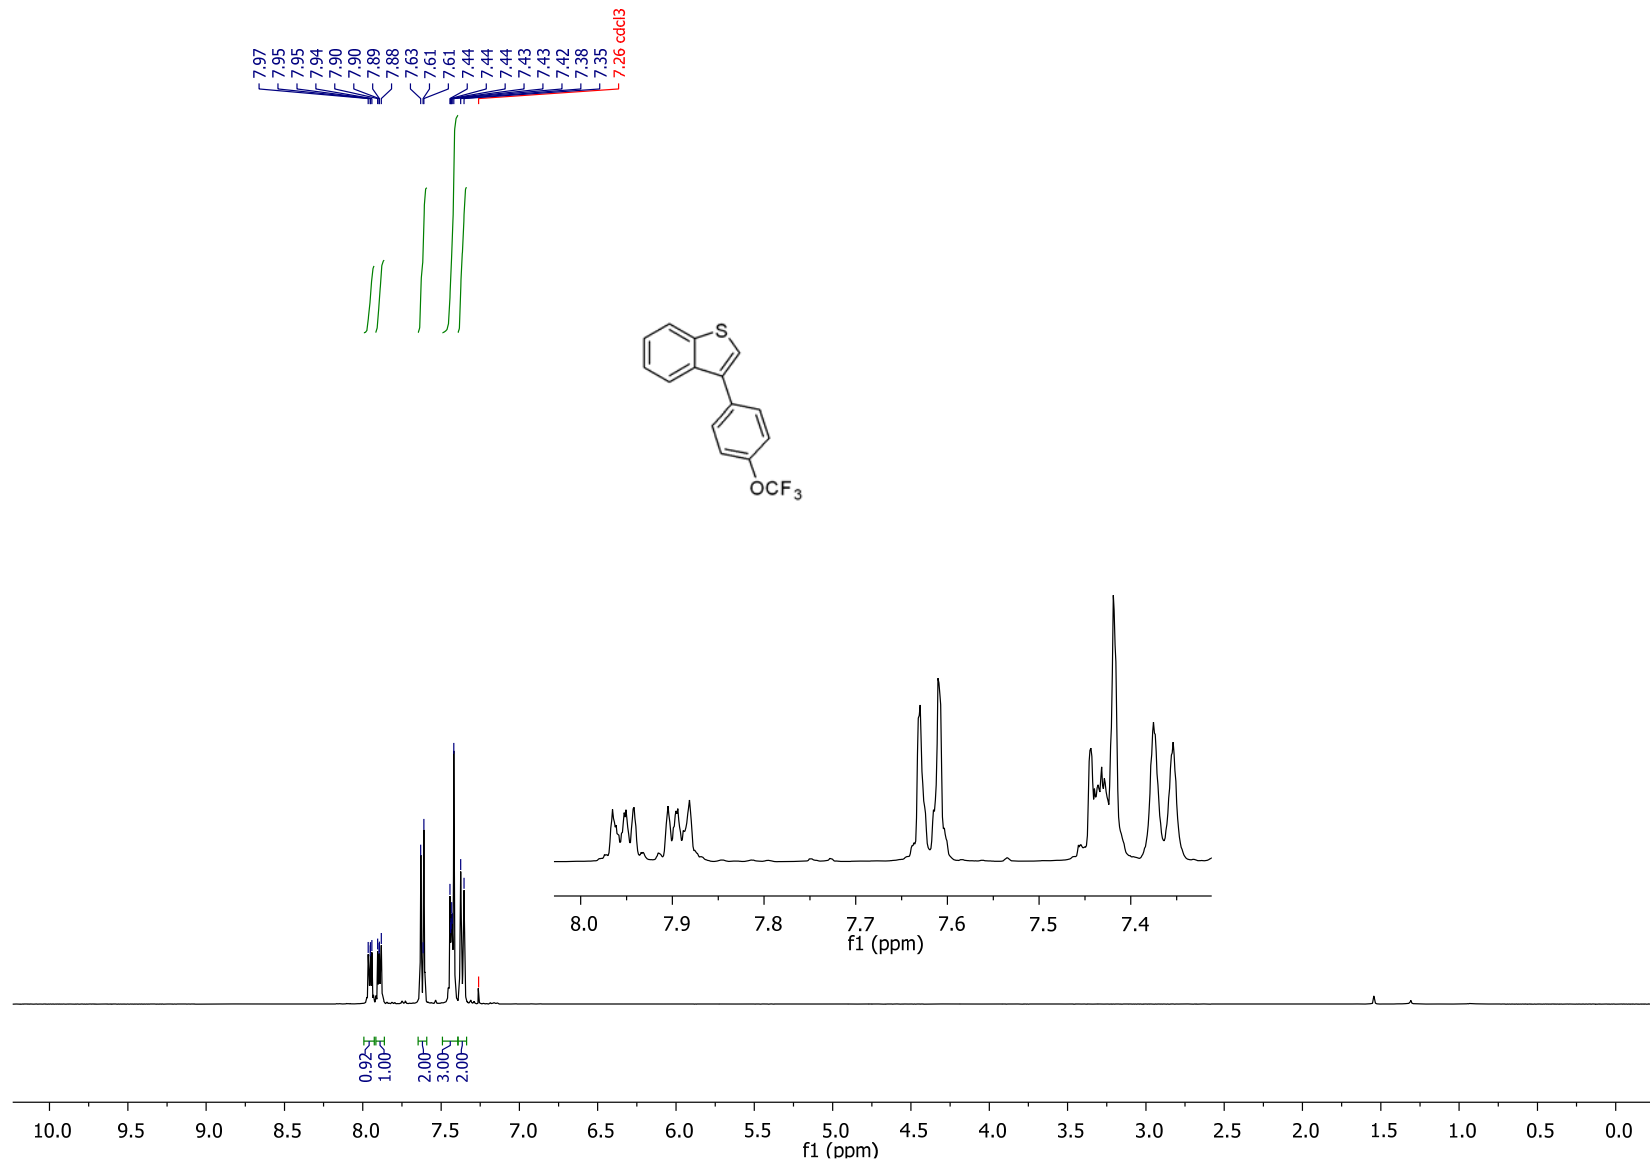

148.8  
148.8  
140.9  
137.8  
136.8  
134.9  
130.2  
124.8  
124.7  
124.6  
124.2  
123.2  
122.8  
122.0  
121.4  
119.5  
116.9

77.5 cdcl3  
77.2 cdcl3  
76.9 cdcl3

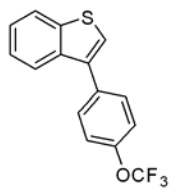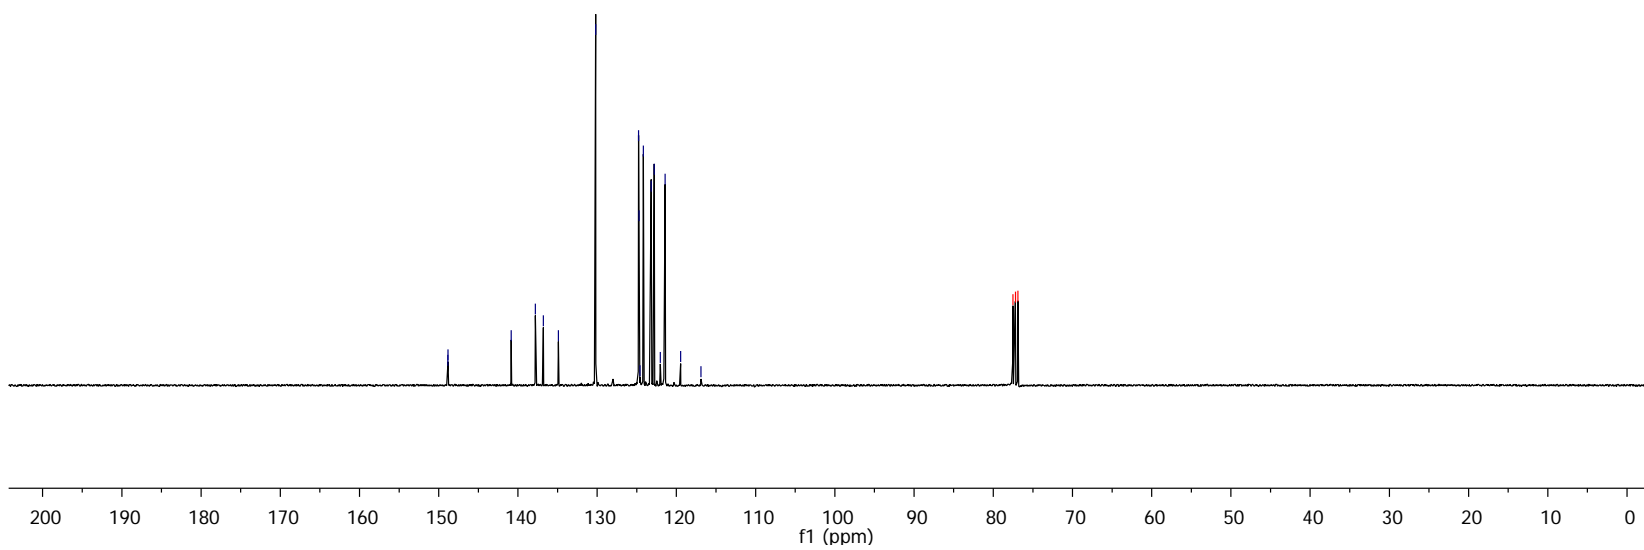

-57.8

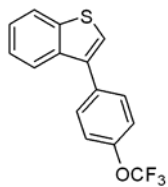

Chemical Formula: C<sub>15</sub>H<sub>9</sub>F<sub>3</sub>OS  
Exact Mass: 294.0326  
Molecular Weight: 294.2912

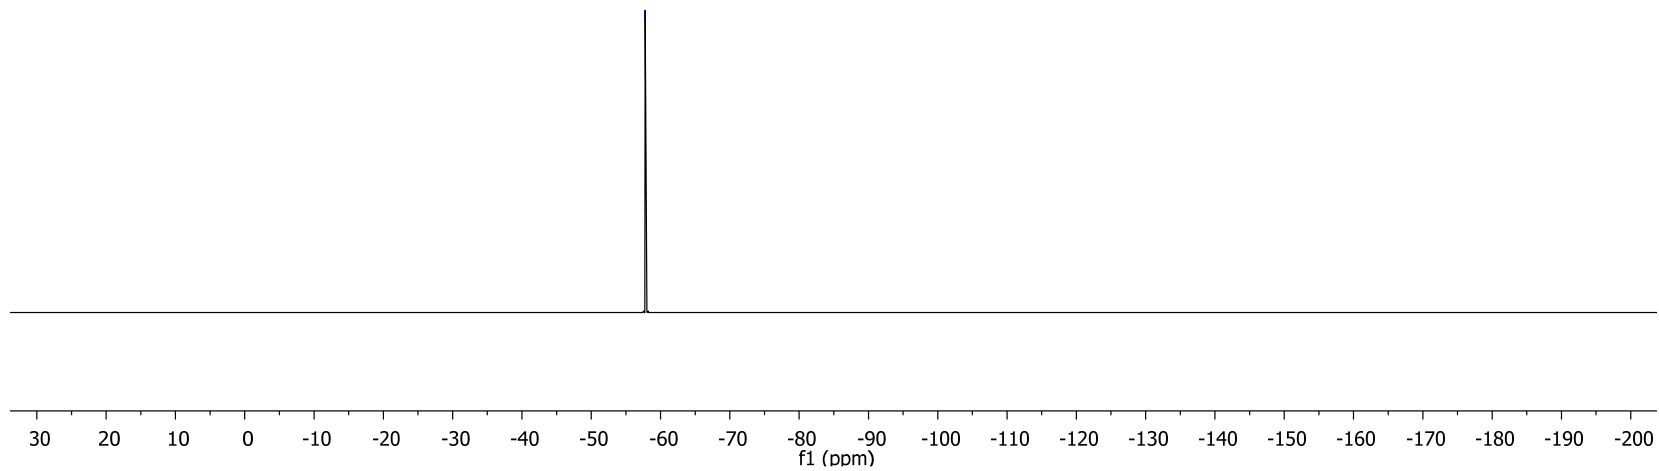

methyl 2-(5-methylbenzofuran-2-yl)benzoate (8a)

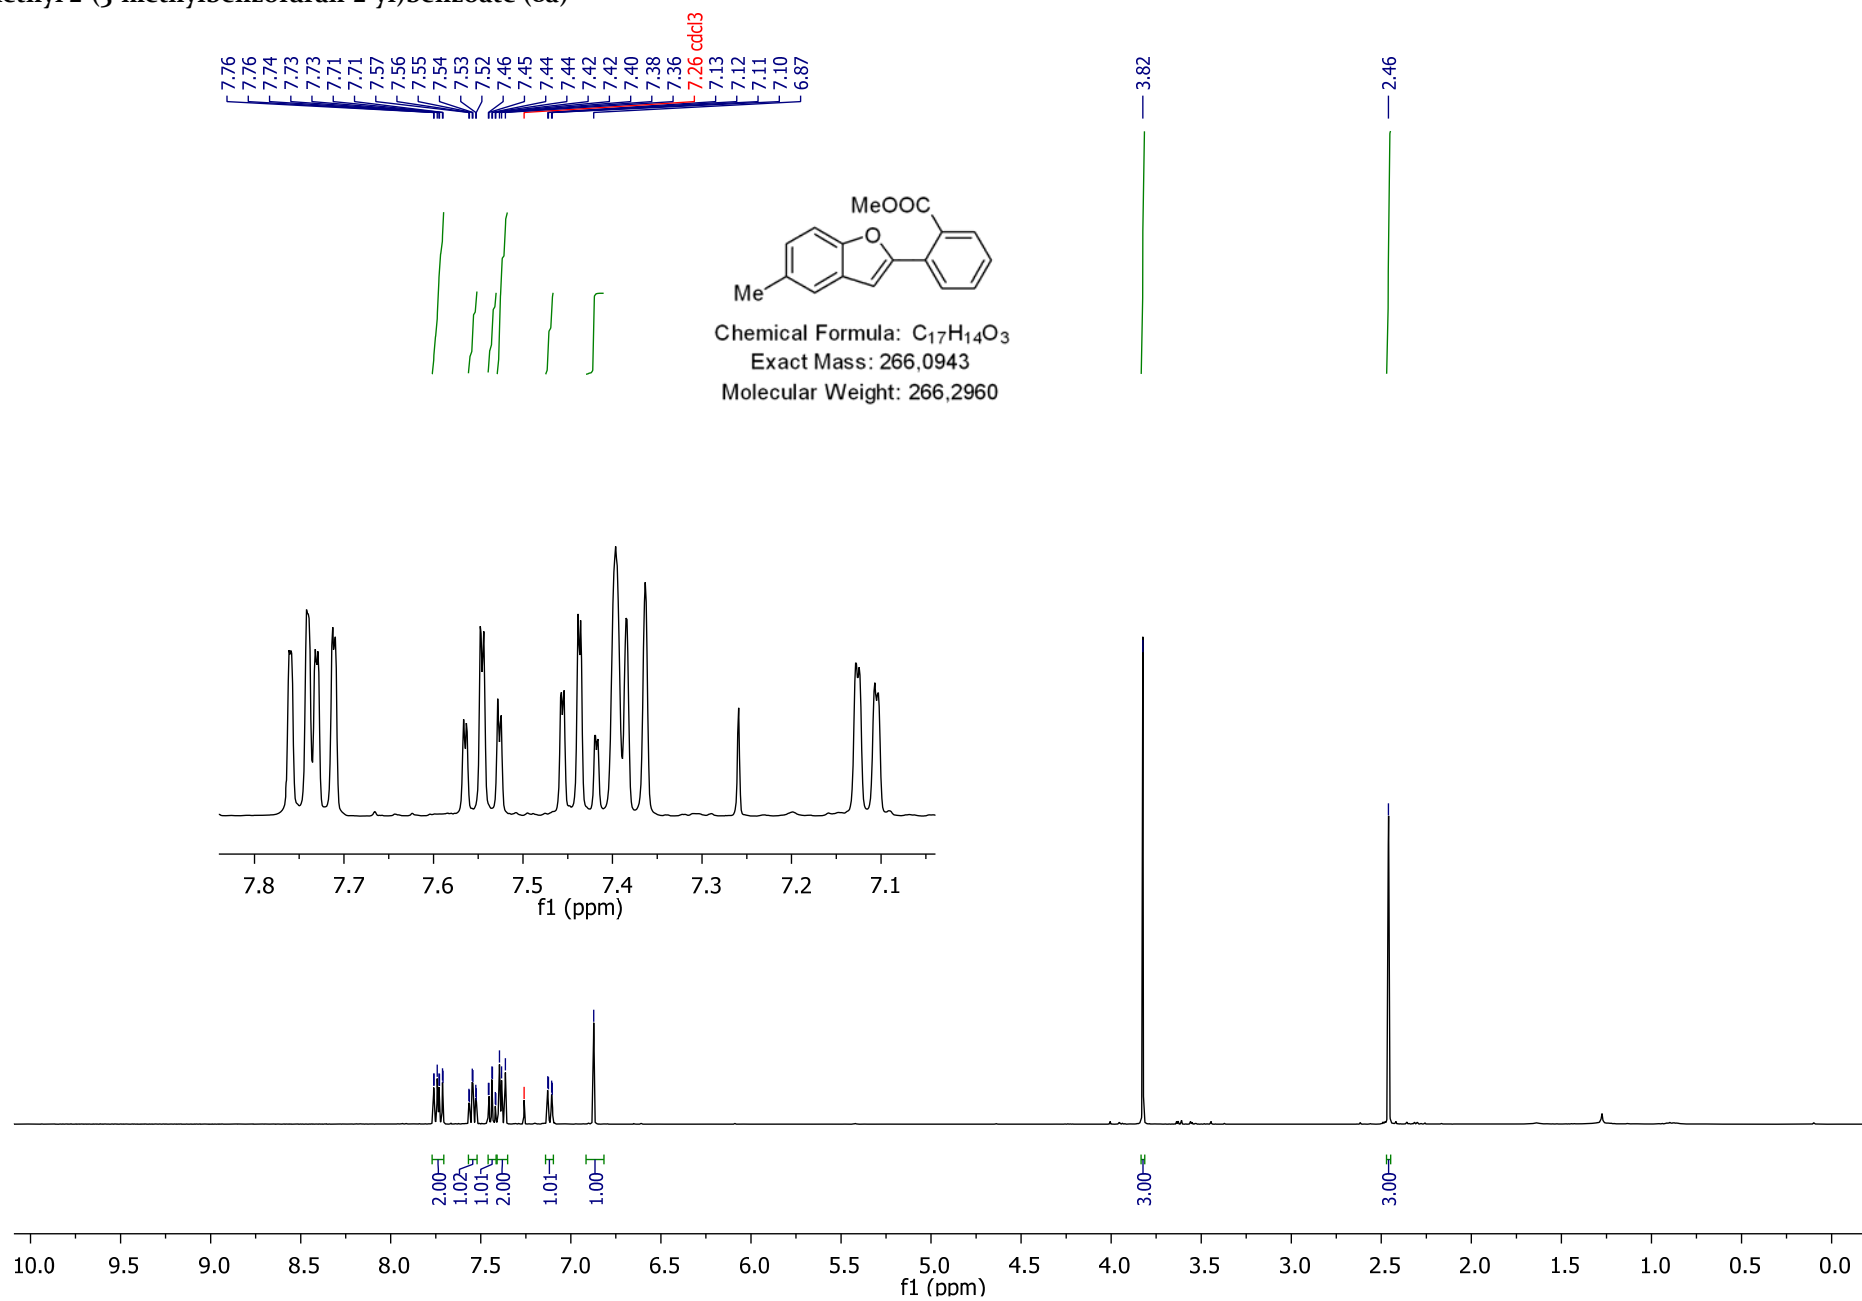

— 169.6

— 154.8  
— 153.7

— 132.5  
— 131.1  
— 131.0  
— 129.8  
— 129.4  
— 129.1  
— 129.0  
— 128.6  
— 126.0  
— 121.1

— 110.7

— 104.2

— 77.5 cdd3  
— 77.2 cdd3  
— 76.8 cdd3

— 52.6

— 21.5

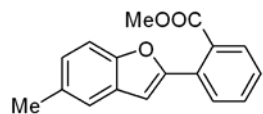

Chemical Formula: C<sub>17</sub>H<sub>14</sub>O<sub>3</sub>

Exact Mass: 266,0943

Molecular Weight: 266,2960

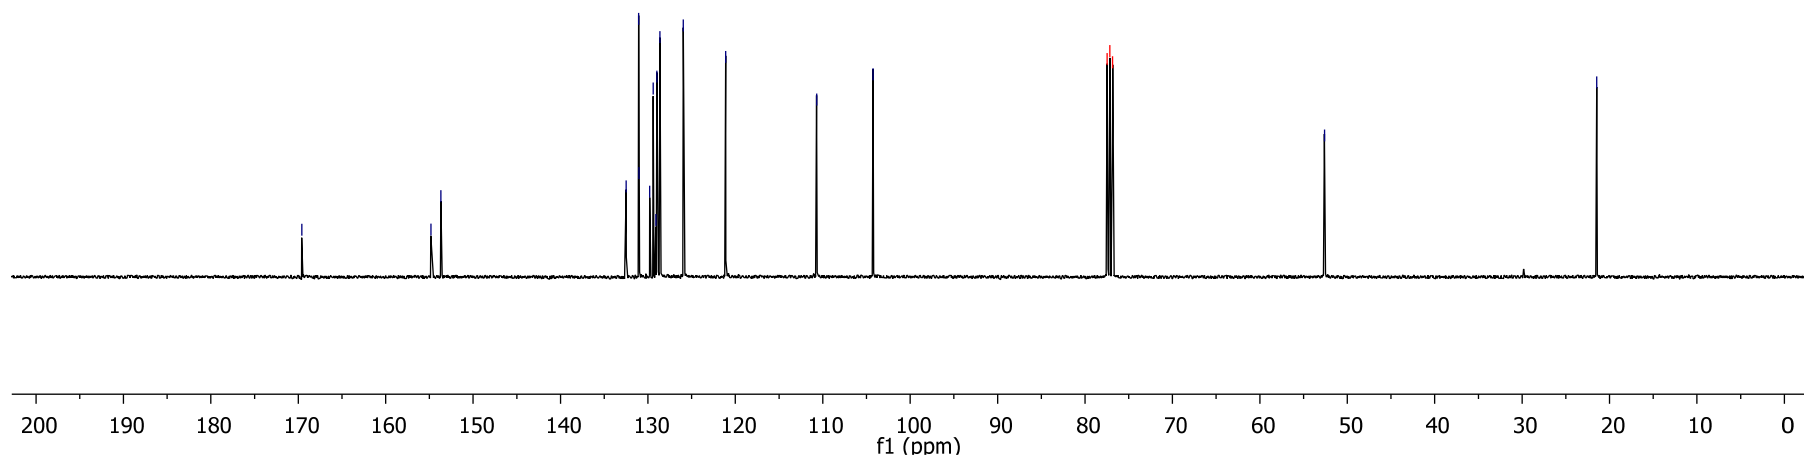

1,2-dimethyl-3-(phenyldiazenyl)-indole (1bb)

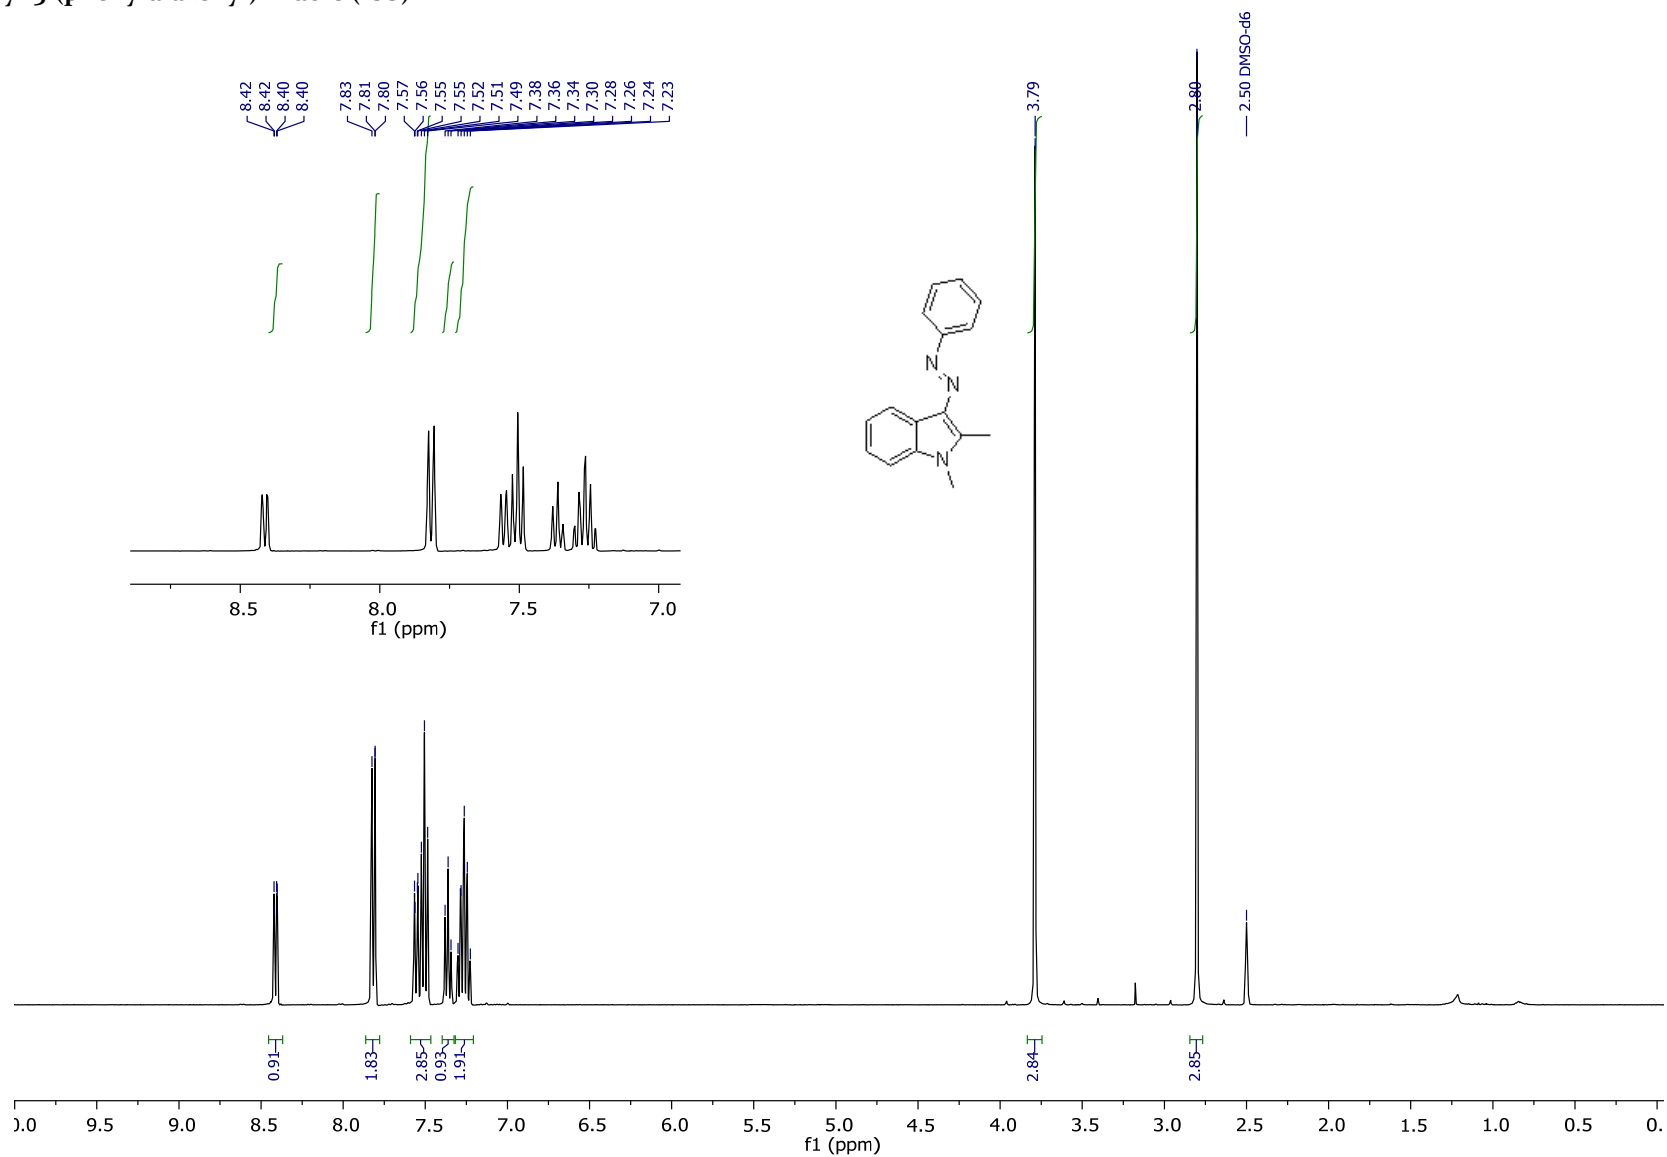

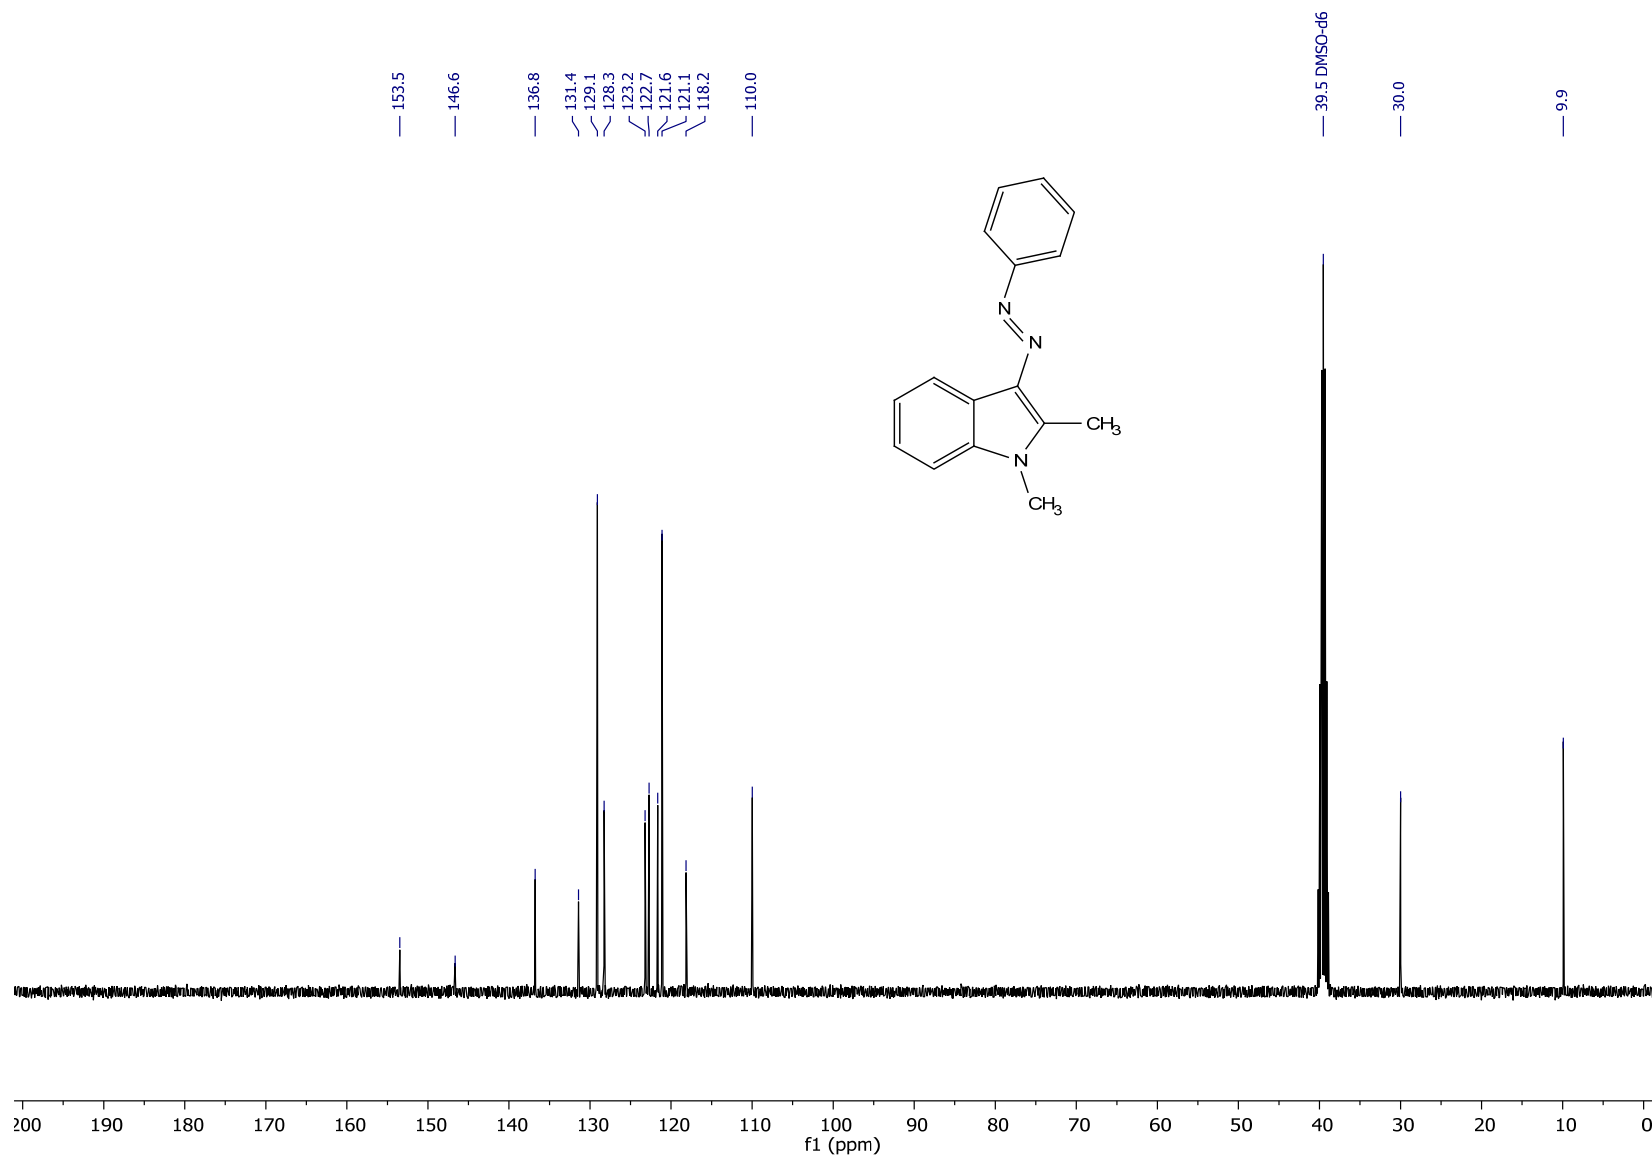

Supplement: SC-008-C6SC02595A-s001.pdf [file SC-008-C6SC02595A-s001.pdf]
